# Supplementary material for: Tropomyosin micelles are the major white components in the boiled soup of shellfish
Source: Research Square preprint supplement (doi:10.21203/rs.3.rs-1139359/v1), 2021-12-06
Supplement: Supplementary file 1 [file 2f11b58fb5584ac983635f61.xlsx]

## Sheet: Sheet1
Sequence	A	R	N	D	C	Q	E	G	H	I	L	K	M	F	P	S	T	W	Y	V	X	unique_aa_number	length
sp|Q6IE81|JADE1_HUMAN Protein Jade-1 OS=Homo sapiens (Human) OX=9606 GN=JADE1 PE=1 SV=1	40	58	33	48	28	36	71	46	23	29	69	67	18	25	51	77	35	11	20	57	0	20	842
sp|Q9HCU9|BRMS1_HUMAN Breast cancer metastasis-suppressor 1 OS=Homo sapiens (Human) OX=9606 GN=BRMS1 PE=1 SV=1	13	20	2	16	3	14	41	13	2	9	27	17	6	3	11	25	5	4	7	8	0	20	246
sp|O43823|AKAP8_HUMAN A-kinase anchor protein 8 OS=Homo sapiens (Human) OX=9606 GN=AKAP8 PE=1 SV=1	66	52	21	54	10	32	67	72	13	13	32	38	17	27	47	50	29	4	23	25	0	20	692
sp|P05166|PCCB_HUMAN Propionyl-CoA carboxylase beta chain, mitochondrial OS=Homo sapiens (Human) OX=9606 GN=PCCB PE=1 SV=3	59	34	21	32	11	15	25	47	11	35	36	24	12	27	25	33	27	2	13	50	0	20	539
sp|Q5TAX3|TUT4_HUMAN Terminal uridylyltransferase 4 OS=Homo sapiens (Human) OX=9606 GN=TUT4 PE=1 SV=3	96	89	86	99	52	78	121	77	36	85	144	144	28	60	114	139	71	12	35	78	0	20	1644
sp|Q9Y3C5|RNF11_HUMAN RING finger protein 11 OS=Homo sapiens (Human) OX=9606 GN=RNF11 PE=1 SV=1	5	8	2	12	7	9	12	8	5	10	12	4	6	4	16	12	8	1	6	7	0	20	154
sp|P38936|CDN1A_HUMAN Cyclin-dependent kinase inhibitor 1 OS=Homo sapiens (Human) OX=9606 GN=CDKN1A PE=1 SV=3	9	20	2	11	5	7	12	20	2	2	15	6	3	6	13	13	8	2	2	6	0	20	164
sp|Q9BXV9|GON7_HUMAN EKC/KEOPS complex subunit GON7 OS=Homo sapiens (Human) OX=9606 GN=GON7 PE=1 SV=2	7	4	4	14	1	6	10	10	1	1	8	5	3	3	8	4	3	0	1	7	0	19	100
sp|Q9UKB1|FBW1B_HUMAN F-box/WD repeat-containing protein 11 OS=Homo sapiens (Human) OX=9606 GN=FBXW11 PE=1 SV=1	22	43	21	37	21	20	32	27	15	38	53	24	10	13	16	53	27	14	16	40	0	20	542
sp|Q0P651|ABD18_HUMAN Protein ABHD18 OS=Homo sapiens (Human) OX=9606 GN=ABHD18 PE=2 SV=1	19	27	16	18	8	14	21	26	13	22	44	26	16	16	21	42	19	7	13	26	0	20	414
sp|Q12888|TP53B_HUMAN TP53-binding protein 1 OS=Homo sapiens (Human) OX=9606 GN=TP53BP1 PE=1 SV=2	109	77	57	121	36	110	209	135	40	71	154	105	32	39	151	246	125	8	27	120	0	20	1972
sp|P01579|IFNG_HUMAN Interferon gamma OS=Homo sapiens (Human) OX=9606 GN=IFNG PE=1 SV=1	9	8	10	10	3	10	9	7	2	9	14	21	5	11	2	13	6	1	7	9	0	20	166
sp|Q76FK4|NOL8_HUMAN Nucleolar protein 8 OS=Homo sapiens (Human) OX=9606 GN=NOL8 PE=1 SV=1	58	60	56	87	16	48	117	59	27	44	74	139	23	38	50	130	69	8	15	49	0	20	1167
sp|Q8N9V7|TOPZ1_HUMAN Protein TOPAZ1 OS=Homo sapiens (Human) OX=9606 GN=TOPAZ1 PE=2 SV=3	81	81	102	73	44	64	152	79	29	81	172	153	38	57	83	169	79	15	40	100	0	20	1692
sp|Q9UQ84|EXO1_HUMAN Exonuclease 1 OS=Homo sapiens (Human) OX=9606 GN=EXO1 PE=1 SV=2	48	45	42	56	20	35	53	45	16	43	72	74	10	32	47	98	41	5	19	45	0	20	846
tr|A0A0J9YWD0|A0A0J9YWD0_HUMAN Immunoglobulin heavy diversity 3-3 OS=Homo sapiens (Human) OX=9606 GN=IGHD3-3 PE=4 SV=1	0	1	0	0	0	0	1	0	0	0	4	0	0	1	0	0	0	1	1	1	0	7	10
sp|Q6UWT4|CE046_HUMAN Uncharacterized protein C5orf46 OS=Homo sapiens (Human) OX=9606 GN=C5orf46 PE=3 SV=2	3	3	2	11	1	0	5	5	1	3	11	8	3	6	6	8	4	0	1	6	0	18	87
sp|Q8NAA5|LR75A_HUMAN Leucine-rich repeat-containing protein 75A OS=Homo sapiens (Human) OX=9606 GN=LRRC75A PE=2 SV=2	25	32	7	21	4	15	20	33	10	9	48	12	7	6	26	20	21	3	6	19	0	20	344
sp|Q6W2J9|BCOR_HUMAN BCL-6 corepressor OS=Homo sapiens (Human) OX=9606 GN=BCOR PE=1 SV=1	134	93	72	96	27	62	130	104	42	46	153	110	29	40	177	184	90	15	51	100	0	20	1755
sp|Q9UM01|YLAT1_HUMAN Y+L amino acid transporter 1 OS=Homo sapiens (Human) OX=9606 GN=SLC7A7 PE=1 SV=2	46	17	15	16	12	11	22	37	4	50	61	14	10	34	26	43	21	7	24	41	0	20	511
sp|A6NI73|LIRA5_HUMAN Leukocyte immunoglobulin-like receptor subfamily A member 5 OS=Homo sapiens (Human) OX=9606 GN=LILRA5 PE=1 SV=1	21	17	9	11	5	16	15	24	9	10	34	7	6	7	25	33	15	8	8	19	0	20	299
sp|Q8IZL2|MAML2_HUMAN Mastermind-like protein 2 OS=Homo sapiens (Human) OX=9606 GN=MAML2 PE=1 SV=2	80	45	83	33	5	194	29	87	27	33	94	32	40	21	114	127	62	4	14	32	0	20	1156
sp|Q5TGZ0|MIC10_HUMAN MICOS complex subunit MIC10 OS=Homo sapiens (Human) OX=9606 GN=MICOS10 PE=1 SV=1	5	4	1	3	2	4	4	10	2	2	8	5	4	6	2	5	2	2	3	4	0	20	78
sp|Q9UBR1|BUP1_HUMAN Beta-ureidopropionase OS=Homo sapiens (Human) OX=9606 GN=UPB1 PE=1 SV=1	38	24	21	14	9	12	33	24	12	19	31	17	8	18	20	22	16	7	12	27	0	20	384
sp|P02538|K2C6A_HUMAN Keratin, type II cytoskeletal 6A OS=Homo sapiens (Human) OX=9606 GN=KRT6A PE=1 SV=3	42	36	24	24	5	30	40	81	5	27	52	30	8	17	8	60	26	2	17	30	0	20	564
sp|Q9H4B6|SAV1_HUMAN Protein salvador homolog 1 OS=Homo sapiens (Human) OX=9606 GN=SAV1 PE=1 SV=2	20	32	18	19	2	24	24	20	14	10	31	18	8	12	30	30	21	7	24	19	0	20	383
sp|Q13277|STX3_HUMAN Syntaxin-3 OS=Homo sapiens (Human) OX=9606 GN=STX3 PE=1 SV=3	16	16	11	21	0	13	34	9	7	29	28	28	10	7	4	20	14	0	3	19	0	18	289
sp|Q9Y5V3|MAGD1_HUMAN Melanoma-associated antigen D1 OS=Homo sapiens (Human) OX=9606 GN=MAGED1 PE=1 SV=3	92	39	46	41	2	49	40	44	5	33	53	35	14	25	90	41	49	33	14	33	0	20	778
sp|Q86TL2|STIMA_HUMAN Store-operated calcium entry regulator STIMATE OS=Homo sapiens (Human) OX=9606 GN=STIMATE PE=1 SV=1	21	18	9	12	4	9	21	22	5	16	37	17	10	16	14	18	7	7	6	25	0	20	294
sp|Q8IVU3|HERC6_HUMAN Probable E3 ubiquitin-protein ligase HERC6 OS=Homo sapiens (Human) OX=9606 GN=HERC6 PE=1 SV=2	61	49	38	47	26	49	66	63	33	54	107	70	28	55	50	88	49	12	23	54	0	20	1022
sp|Q99941|ATF6B_HUMAN Cyclic AMP-dependent transcription factor ATF-6 beta OS=Homo sapiens (Human) OX=9606 GN=ATF6B PE=1 SV=2	42	45	18	32	10	44	49	37	11	22	77	28	15	19	85	85	27	4	6	47	0	20	703
sp|Q9NX01|TXN4B_HUMAN Thioredoxin-like protein 4B OS=Homo sapiens (Human) OX=9606 GN=TXNL4B PE=1 SV=1	6	4	2	16	1	8	4	6	2	12	14	14	4	9	7	12	8	0	8	12	0	19	149
sp|Q68DA7|FMN1_HUMAN Formin-1 OS=Homo sapiens (Human) OX=9606 GN=FMN1 PE=1 SV=3	82	80	40	66	23	63	122	88	38	52	134	123	16	45	153	125	73	10	25	61	0	20	1419
sp|P55087|AQP4_HUMAN Aquaporin-4 OS=Homo sapiens (Human) OX=9606 GN=AQP4 PE=1 SV=2	28	11	9	11	8	8	14	34	7	26	26	15	10	17	12	21	19	7	7	33	0	20	323
sp|O60609|GFRA3_HUMAN GDNF family receptor alpha-3 OS=Homo sapiens (Human) OX=9606 GN=GFRA3 PE=1 SV=2	31	27	19	16	29	15	18	14	13	8	57	11	13	12	38	31	20	5	6	17	0	20	400
sp|P49257|LMAN1_HUMAN Protein ERGIC-53 OS=Homo sapiens (Human) OX=9606 GN=LMAN1 PE=1 SV=2	31	29	23	27	5	35	38	43	17	30	34	30	10	29	27	28	22	5	13	34	0	20	510
sp|P45974|UBP5_HUMAN Ubiquitin carboxyl-terminal hydrolase 5 OS=Homo sapiens (Human) OX=9606 GN=USP5 PE=1 SV=2	57	42	25	63	16	33	72	62	17	39	72	51	24	37	58	61	37	9	27	56	0	20	858
sp|Q96PG2|M4A10_HUMAN Membrane-spanning 4-domains subfamily A member 10 OS=Homo sapiens (Human) OX=9606 GN=MS4A10 PE=2 SV=3	21	7	7	7	6	15	9	11	9	14	37	16	5	11	21	21	18	8	5	19	0	20	267
sp|P57058|HUNK_HUMAN Hormonally up-regulated neu tumor-associated kinase OS=Homo sapiens (Human) OX=9606 GN=HUNK PE=1 SV=1	43	46	31	36	13	25	42	46	22	31	77	52	19	20	62	60	27	4	21	37	0	20	714
sp|Q8WUR7|CO040_HUMAN UPF0235 protein C15orf40 OS=Homo sapiens (Human) OX=9606 GN=C15orf40 PE=1 SV=2	18	10	4	4	3	2	13	10	2	4	18	19	2	0	12	10	10	0	1	11	0	18	153
sp|P35548|MSX2_HUMAN Homeobox protein MSX-2 OS=Homo sapiens (Human) OX=9606 GN=MSX2 PE=1 SV=3	29	16	5	4	1	8	20	18	6	5	25	18	7	10	33	30	12	2	7	11	0	20	267
sp|Q6T310|RSLBA_HUMAN Ras-like protein family member 11A OS=Homo sapiens (Human) OX=9606 GN=RASL11A PE=2 SV=1	12	15	5	15	3	15	10	17	6	15	29	15	5	7	15	24	6	1	9	18	0	20	242
sp|Q9UHI5|LAT2_HUMAN Large neutral amino acids transporter small subunit 2 OS=Homo sapiens (Human) OX=9606 GN=SLC7A8 PE=1 SV=1	41	13	19	12	11	16	27	50	5	41	63	21	12	32	32	30	27	11	20	52	0	20	535
sp|O75326|SEM7A_HUMAN Semaphorin-7A OS=Homo sapiens (Human) OX=9606 GN=SEMA7A PE=1 SV=1	44	44	26	29	19	33	40	48	25	21	61	26	11	25	52	52	28	12	26	44	0	20	666
sp|Q9H019|MFR1L_HUMAN Mitochondrial fission regulator 1-like OS=Homo sapiens (Human) OX=9606 GN=MTFR1L PE=1 SV=2	27	19	8	16	8	6	23	8	6	14	31	15	6	8	24	37	15	3	1	17	0	20	292
sp|Q92988|DLX4_HUMAN Homeobox protein DLX-4 OS=Homo sapiens (Human) OX=9606 GN=DLX4 PE=1 SV=4	22	11	6	7	4	19	9	14	6	2	29	12	3	6	32	27	11	3	11	6	0	20	240
sp|P16519|NEC2_HUMAN Neuroendocrine convertase 2 OS=Homo sapiens (Human) OX=9606 GN=PCSK2 PE=1 SV=2	54	34	33	44	10	20	35	61	19	24	51	35	18	22	23	42	39	14	22	38	0	20	638
sp|P47871|GLR_HUMAN Glucagon receptor OS=Homo sapiens (Human) OX=9606 GN=GCGR PE=1 SV=1	33	27	15	16	14	23	18	33	15	14	69	18	9	29	27	34	18	16	13	36	0	20	477
sp|A0A0J9YXM7|TJB15_HUMAN T cell receptor beta joining 1-5 OS=Homo sapiens (Human) OX=9606 GN=TRBJ1-5 PE=4 SV=2	0	1	1	1	0	2	0	2	1	1	2	0	0	1	1	2	1	0	0	0	0	12	16
sp|O75153|CLU_HUMAN Clustered mitochondria protein homolog OS=Homo sapiens (Human) OX=9606 GN=CLUH PE=1 SV=2	103	79	54	69	25	61	105	77	41	54	144	63	29	53	76	88	57	7	38	86	0	20	1309
sp|Q9HBL0|TENS1_HUMAN Tensin-1 OS=Homo sapiens (Human) OX=9606 GN=TNS1 PE=1 SV=2	141	93	55	69	16	83	89	143	62	49	133	65	32	52	188	223	91	9	48	94	0	20	1735
sp|B4DS77|SHSA9_HUMAN Protein shisa-9 OS=Homo sapiens (Human) OX=9606 GN=SHISA9 PE=2 SV=3	31	27	24	22	13	20	18	33	16	9	36	23	10	14	37	24	29	4	12	22	0	20	424
sp|Q9NY61|AATF_HUMAN Protein AATF OS=Homo sapiens (Human) OX=9606 GN=AATF PE=1 SV=1	37	36	11	54	2	26	64	39	13	16	58	43	10	20	28	45	22	5	9	22	0	20	560
sp|Q8N6W0|CELF5_HUMAN CUGBP Elav-like family member 5 OS=Homo sapiens (Human) OX=9606 GN=CELF5 PE=1 SV=1	43	20	9	18	7	40	19	42	13	19	45	21	14	24	48	35	29	0	12	27	0	19	485
sp|O15260|SURF4_HUMAN Surfeit locus protein 4 OS=Homo sapiens (Human) OX=9606 GN=SURF4 PE=1 SV=3	18	9	8	11	4	12	8	22	3	14	43	11	13	22	6	15	14	7	9	20	0	20	269
sp|Q9UFV1|TBC29_HUMAN Putative TBC1 domain family member 29 OS=Homo sapiens (Human) OX=9606 GN=TBC1D29P PE=5 SV=1	7	12	2	4	4	7	8	16	2	7	23	5	4	2	10	19	9	3	2	4	0	20	150
sp|Q12913|PTPRJ_HUMAN Receptor-type tyrosine-protein phosphatase eta OS=Homo sapiens (Human) OX=9606 GN=PTPRJ PE=1 SV=3	83	48	72	65	21	47	78	100	26	82	86	63	14	41	82	125	125	19	54	106	0	20	1337
sp|P29275|AA2BR_HUMAN Adenosine receptor A2b OS=Homo sapiens (Human) OX=9606 GN=ADORA2B PE=1 SV=1	36	12	16	9	14	11	7	19	5	19	45	10	8	19	13	17	20	5	12	35	0	20	332
sp|Q8N4G2|ARL14_HUMAN ADP-ribosylation factor-like protein 14 OS=Homo sapiens (Human) OX=9606 GN=ARL14 PE=1 SV=2	9	8	9	10	5	11	11	15	3	7	23	18	6	7	5	10	14	3	4	14	0	20	192
sp|Q9Y4C1|KDM3A_HUMAN Lysine-specific demethylase 3A OS=Homo sapiens (Human) OX=9606 GN=KDM3A PE=1 SV=4	77	57	72	73	39	59	84	71	33	57	126	112	17	41	87	111	64	24	21	96	0	20	1321
sp|Q15276|RABE1_HUMAN Rab GTPase-binding effector protein 1 OS=Homo sapiens (Human) OX=9606 GN=RABEP1 PE=1 SV=2	66	49	29	49	7	89	120	23	16	31	107	71	21	15	13	63	34	5	11	43	0	20	862
sp|Q8NBZ0|IN80E_HUMAN INO80 complex subunit E OS=Homo sapiens (Human) OX=9606 GN=INO80E PE=1 SV=1	13	16	4	20	2	6	12	18	1	4	29	18	4	7	36	27	11	0	7	9	0	19	244
sp|P17028|ZNF24_HUMAN Zinc finger protein 24 OS=Homo sapiens (Human) OX=9606 GN=ZNF24 PE=1 SV=4	14	26	11	16	11	24	44	23	17	15	35	22	3	11	23	29	10	5	6	23	0	20	368
sp|Q8IWQ3|BRSK2_HUMAN Serine/threonine-protein kinase BRSK2 OS=Homo sapiens (Human) OX=9606 GN=BRSK2 PE=1 SV=3	41	47	20	37	11	29	50	53	25	36	70	52	15	25	64	66	33	4	15	43	0	20	736
sp|P12724|ECP_HUMAN Eosinophil cationic protein OS=Homo sapiens (Human) OX=9606 GN=RNASE3 PE=1 SV=2	9	18	15	6	9	7	1	6	6	9	15	2	3	7	13	7	10	2	4	11	0	20	160
sp|Q15274|NADC_HUMAN Nicotinate-nucleotide pyrophosphorylase [carboxylating] OS=Homo sapiens (Human) OX=9606 GN=QPRT PE=1 SV=3	50	11	6	12	6	10	16	27	7	6	37	12	4	11	18	15	12	4	3	30	0	20	297
sp|Q9P2H0|CE126_HUMAN Centrosomal protein of 126 kDa OS=Homo sapiens (Human) OX=9606 GN=CEP126 PE=1 SV=3	57	55	81	39	20	74	95	39	28	64	86	99	11	35	58	129	74	7	18	48	0	20	1117
sp|Q12893|TM115_HUMAN Transmembrane protein 115 OS=Homo sapiens (Human) OX=9606 GN=TMEM115 PE=1 SV=1	37	17	5	14	4	12	12	24	7	11	59	11	8	17	22	24	17	6	9	35	0	20	351
sp|P30530|UFO_HUMAN Tyrosine-protein kinase receptor UFO OS=Homo sapiens (Human) OX=9606 GN=AXL PE=1 SV=4	69	49	22	42	22	50	61	72	21	26	94	25	20	22	79	56	54	19	26	65	0	20	894
sp|Q9NQB0|TF7L2_HUMAN Transcription factor 7-like 2 OS=Homo sapiens (Human) OX=9606 GN=TCF7L2 PE=1 SV=2	42	28	20	26	9	34	35	35	28	19	60	40	11	11	79	69	29	5	17	22	0	20	619
sp|Q8NI36|WDR36_HUMAN WD repeat-containing protein 36 OS=Homo sapiens (Human) OX=9606 GN=WDR36 PE=1 SV=1	60	40	42	49	18	40	46	68	26	59	114	55	21	42	45	85	48	15	20	58	0	20	951
sp|Q68G75|LEMD1_HUMAN LEM domain-containing protein 1 OS=Homo sapiens (Human) OX=9606 GN=LEMD1 PE=2 SV=2	9	9	5	10	5	6	13	11	0	11	20	18	2	5	12	13	11	3	6	12	0	19	181
sp|Q14623|IHH_HUMAN Indian hedgehog protein OS=Homo sapiens (Human) OX=9606 GN=IHH PE=1 SV=4	45	34	8	18	6	11	23	34	18	7	47	13	5	16	28	27	18	8	11	34	0	20	411
tr|A0A075B711|A0A075B711_HUMAN T cell receptor alpha joining 29 OS=Homo sapiens (Human) OX=9606 GN=TRAJ29 PE=4 SV=1	1	1	2	0	0	0	0	3	0	1	2	1	0	1	1	2	2	0	0	2	1	12	20
sp|K7EIQ3|CS082_HUMAN Uncharacterized protein ZNF561-AS1 OS=Homo sapiens (Human) OX=9606 GN=ZNF561-AS1 PE=4 SV=1	5	7	1	4	3	6	5	9	3	5	14	5	3	3	8	9	6	3	1	4	0	20	104
sp|Q00577|PURA_HUMAN Transcriptional activator protein Pur-alpha OS=Homo sapiens (Human) OX=9606 GN=PURA PE=1 SV=2	24	21	9	15	2	25	29	49	5	9	26	20	5	13	12	20	12	1	10	15	0	20	322
sp|Q9H0E9|BRD8_HUMAN Bromodomain-containing protein 8 OS=Homo sapiens (Human) OX=9606 GN=BRD8 PE=1 SV=2	96	50	31	80	14	53	146	69	27	53	96	62	38	28	90	125	63	12	15	87	0	20	1235
sp|O75695|XRP2_HUMAN Protein XRP2 OS=Homo sapiens (Human) OX=9606 GN=RP2 PE=1 SV=4	20	18	17	24	15	17	26	20	2	21	22	22	6	26	15	24	16	4	8	27	0	20	350
sp|Q16676|FOXD1_HUMAN Forkhead box protein D1 OS=Homo sapiens (Human) OX=9606 GN=FOXD1 PE=1 SV=1	97	23	10	19	5	9	28	60	7	13	36	10	4	13	58	38	11	2	12	10	0	20	465
sp|O00570|SOX1_HUMAN Transcription factor SOX-1 OS=Homo sapiens (Human) OX=9606 GN=SOX1 PE=1 SV=2	80	17	11	8	1	15	13	65	22	5	22	16	18	2	32	27	6	3	14	14	0	20	391
sp|Q9BV40|VAMP8_HUMAN Vesicle-associated membrane protein 8 OS=Homo sapiens (Human) OX=9606 GN=VAMP8 PE=1 SV=1	6	6	7	2	1	3	11	6	2	9	8	7	3	6	0	5	6	2	0	10	0	18	100
sp|P31415|CASQ1_HUMAN Calsequestrin-1 OS=Homo sapiens (Human) OX=9606 GN=CASQ1 PE=1 SV=3	27	9	12	48	0	8	56	19	5	20	40	24	9	22	20	16	14	5	12	30	0	19	396
sp|Q96A56|T53I1_HUMAN Tumor protein p53-inducible nuclear protein 1 OS=Homo sapiens (Human) OX=9606 GN=TP53INP1 PE=1 SV=1	11	11	11	9	10	12	30	8	11	8	16	6	6	12	19	26	14	4	4	12	0	20	240
sp|Q9NX58|LYAR_HUMAN Cell growth-regulating nucleolar protein OS=Homo sapiens (Human) OX=9606 GN=LYAR PE=1 SV=2	21	19	21	18	8	19	42	20	12	17	19	68	3	9	16	23	9	5	5	25	0	20	379
sp|Q3LI81|KR271_HUMAN Keratin-associated protein 27-1 OS=Homo sapiens (Human) OX=9606 GN=KRTAP27-1 PE=2 SV=1	9	7	11	5	19	18	13	8	6	2	13	5	3	9	18	34	17	0	1	9	0	19	207
sp|Q8N8I0|SAM12_HUMAN Sterile alpha motif domain-containing protein 12 OS=Homo sapiens (Human) OX=9606 GN=SAMD12 PE=2 SV=2	11	12	8	7	3	19	15	13	7	14	28	17	3	3	7	8	11	3	2	10	0	20	201
sp|Q6L8G9|KRA56_HUMAN Keratin-associated protein 5-6 OS=Homo sapiens (Human) OX=9606 GN=KRTAP5-6 PE=1 SV=1	2	0	0	0	45	4	0	31	0	3	0	7	1	0	6	24	1	0	1	4	0	12	129
sp|Q902F9|EN113_HUMAN Endogenous retrovirus group K member 113 Env polyprotein OS=Homo sapiens (Human) OX=9606 GN=HERVK_113 PE=1 SV=1	41	41	36	27	18	32	35	29	18	43	63	37	24	16	47	54	46	20	16	56	0	20	699
sp|Q86V48|LUZP1_HUMAN Leucine zipper protein 1 OS=Homo sapiens (Human) OX=9606 GN=LUZP1 PE=1 SV=2	64	84	57	49	10	41	123	53	21	33	94	97	14	19	51	135	64	4	12	51	0	20	1076
sp|Q8N136|DAW1_HUMAN Dynein assembly factor with WDR repeat domains 1 OS=Homo sapiens (Human) OX=9606 GN=DAW1 PE=1 SV=1	28	14	19	25	14	11	23	32	13	29	42	28	4	15	8	34	39	8	11	18	0	20	415
sp|P0DPH8|TBA3D_HUMAN Tubulin alpha-3D chain OS=Homo sapiens (Human) OX=9606 GN=TUBA3D PE=1 SV=1	40	21	16	27	12	15	36	35	13	26	33	19	10	20	20	20	29	4	19	35	0	20	450
sp|A0A0G2JMD5|PRA33_HUMAN PRAME family member 33 OS=Homo sapiens (Human) OX=9606 GN=PRAMEF33 PE=3 SV=1	21	31	13	19	15	22	30	17	12	17	83	25	15	22	30	34	21	10	15	22	0	20	474
sp|A6NM03|O2AG2_HUMAN Olfactory receptor 2AG2 OS=Homo sapiens (Human) OX=9606 GN=OR2AG2 PE=2 SV=1	25	14	8	7	7	3	10	15	8	23	57	8	17	14	14	25	23	3	15	20	0	20	316
sp|Q13573|SNW1_HUMAN SNW domain-containing protein 1 OS=Homo sapiens (Human) OX=9606 GN=SNW1 PE=1 SV=1	46	53	17	37	1	32	50	31	10	24	27	53	16	13	36	33	13	4	15	25	0	20	536
sp|Q86T75|NBPFB_HUMAN Neuroblastoma breakpoint family member 11 OS=Homo sapiens (Human) OX=9606 GN=NBPF11 PE=2 SV=3	44	50	26	55	21	66	129	30	18	23	94	65	11	15	46	72	24	6	20	50	0	20	865
sp|Q9UBX5|FBLN5_HUMAN Fibulin-5 OS=Homo sapiens (Human) OX=9606 GN=FBLN5 PE=1 SV=1	16	27	27	28	41	27	25	33	5	28	26	4	11	14	35	27	28	1	26	19	0	20	448
sp|Q6GMV1|ALG1L_HUMAN Putative glycosyltransferase ALG1-like OS=Homo sapiens (Human) OX=9606 GN=ALG1L PE=2 SV=2	7	8	6	10	8	9	14	11	5	2	28	7	8	11	11	17	5	5	0	15	0	19	187
sp|A6NKD9|CC85C_HUMAN Coiled-coil domain-containing protein 85C OS=Homo sapiens (Human) OX=9606 GN=CCDC85C PE=1 SV=1	44	34	9	23	5	23	35	42	16	6	52	20	5	5	29	40	6	4	4	17	0	20	419
sp|Q8N3E9|PLCD3_HUMAN 1-phosphatidylinositol 4,5-bisphosphate phosphodiesterase delta-3 OS=Homo sapiens (Human) OX=9606 GN=PLCD3 PE=1 SV=3	69	68	26	38	16	46	64	45	25	26	91	28	17	27	51	49	34	8	21	40	0	20	789
sp|Q9NYM4|GPR83_HUMAN Probable G-protein coupled receptor 83 OS=Homo sapiens (Human) OX=9606 GN=GPR83 PE=2 SV=2	34	20	20	12	12	13	13	10	11	27	54	20	12	29	25	30	24	10	14	33	0	20	423
sp|Q149N8|SHPRH_HUMAN E3 ubiquitin-protein ligase SHPRH OS=Homo sapiens (Human) OX=9606 GN=SHPRH PE=1 SV=2	85	98	60	81	46	86	145	69	59	108	166	127	34	50	82	129	84	22	48	104	0	20	1683
sp|Q49AN0|CRY2_HUMAN Cryptochrome-2 OS=Homo sapiens (Human) OX=9606 GN=CRY2 PE=1 SV=2	57	47	18	25	13	19	41	35	11	22	60	26	11	26	46	45	23	17	19	32	0	20	593
sp|P50226|ST1A2_HUMAN Sulfotransferase 1A2 OS=Homo sapiens (Human) OX=9606 GN=SULT1A2 PE=1 SV=2	16	14	6	13	2	11	22	14	9	11	28	22	14	16	21	18	17	6	15	20	0	20	295
sp|Q96EH3|MASU1_HUMAN Mitochondrial assembly of ribosomal large subunit protein 1 OS=Homo sapiens (Human) OX=9606 GN=MALSU1 PE=1 SV=1	18	17	3	16	6	6	19	16	7	10	22	9	9	7	15	12	12	3	6	21	0	20	234
sp|Q6UXI7|VITRN_HUMAN Vitrin OS=Homo sapiens (Human) OX=9606 GN=VIT PE=2 SV=1	55	34	29	32	10	31	28	50	12	39	47	44	9	28	39	59	49	6	20	57	0	20	678
sp|Q13315|ATM_HUMAN Serine-protein kinase ATM OS=Homo sapiens (Human) OX=9606 GN=ATM PE=1 SV=4	157	152	137	156	89	154	233	119	72	179	389	214	79	123	98	234	158	38	96	179	0	20	3056
sp|Q9UBU6|FA8A1_HUMAN Protein FAM8A1 OS=Homo sapiens (Human) OX=9606 GN=FAM8A1 PE=1 SV=1	55	27	5	14	7	15	23	34	9	24	28	9	8	18	45	31	20	4	12	25	0	20	413
sp|A9YTQ3|AHRR_HUMAN Aryl hydrocarbon receptor repressor OS=Homo sapiens (Human) OX=9606 GN=AHRR PE=1 SV=3	61	57	7	34	23	38	31	56	22	13	70	27	18	21	77	59	35	6	11	35	0	20	701
sp|Q8WWQ8|STAB2_HUMAN Stabilin-2 OS=Homo sapiens (Human) OX=9606 GN=STAB2 PE=1 SV=3	145	106	157	135	202	102	126	251	62	124	213	120	33	87	128	159	181	18	79	123	0	20	2551
sp|Q9UJH8|METRN_HUMAN Meteorin OS=Homo sapiens (Human) OX=9606 GN=METRN PE=2 SV=2	43	31	0	8	13	11	19	35	9	7	34	0	2	13	24	11	10	4	3	16	0	18	293
sp|Q5T5B0|LCE3E_HUMAN Late cornified envelope protein 3E OS=Homo sapiens (Human) OX=9606 GN=LCE3E PE=1 SV=1	2	7	4	1	14	9	1	15	5	0	2	4	1	1	12	13	0	0	0	1	0	16	92
sp|Q8IV50|LYSM2_HUMAN LysM and putative peptidoglycan-binding domain-containing protein 2 OS=Homo sapiens (Human) OX=9606 GN=LYSMD2 PE=1 SV=1	18	15	7	10	1	9	22	11	3	8	21	11	2	5	20	27	10	0	4	11	0	19	215
sp|P49407|ARRB1_HUMAN Beta-arrestin-1 OS=Homo sapiens (Human) OX=9606 GN=ARRB1 PE=1 SV=2	23	24	19	31	7	10	35	23	9	15	42	35	5	16	30	17	27	0	13	37	0	19	418
sp|O60895|RAMP2_HUMAN Receptor activity-modifying protein 2 OS=Homo sapiens (Human) OX=9606 GN=RAMP2 PE=1 SV=2	16	11	5	9	5	6	11	9	5	10	22	4	4	8	16	8	10	4	3	9	0	20	175
sp|Q9NYP9|MS18A_HUMAN Protein Mis18-alpha OS=Homo sapiens (Human) OX=9606 GN=MIS18A PE=1 SV=1	16	14	6	12	17	8	25	13	1	4	29	17	6	4	3	31	5	4	4	14	0	20	233
sp|Q9H8T0|AKTIP_HUMAN AKT-interacting protein OS=Homo sapiens (Human) OX=9606 GN=AKTIP PE=1 SV=1	19	13	9	14	2	11	15	12	8	11	20	25	5	15	28	24	17	6	12	26	0	20	292
sp|Q9Y6U7|RN215_HUMAN RING finger protein 215 OS=Homo sapiens (Human) OX=9606 GN=RNF215 PE=4 SV=2	40	29	9	17	11	26	16	31	5	9	62	12	5	6	29	19	11	8	6	26	0	20	377
sp|Q8WXH4|ASB11_HUMAN Ankyrin repeat and SOCS box protein 11 OS=Homo sapiens (Human) OX=9606 GN=ASB11 PE=1 SV=1	39	16	15	9	13	12	19	22	16	14	46	16	3	13	12	13	11	2	7	25	0	20	323
sp|Q8N319|CF223_HUMAN Uncharacterized protein C6orf223 OS=Homo sapiens (Human) OX=9606 GN=C6orf223 PE=2 SV=2	35	41	4	4	2	6	7	23	7	2	27	8	5	2	24	20	13	2	2	8	0	20	242
sp|O60939|SCN2B_HUMAN Sodium channel subunit beta-2 OS=Homo sapiens (Human) OX=9606 GN=SCN2B PE=1 SV=1	8	13	13	12	6	7	16	14	5	7	20	12	8	10	13	14	10	2	5	20	0	20	215
sp|Q8N5W8|FA24B_HUMAN Protein FAM24B OS=Homo sapiens (Human) OX=9606 GN=FAM24B PE=3 SV=2	13	1	5	3	8	2	5	4	2	6	11	7	2	2	6	4	2	2	2	7	0	20	94
sp|Q9Y303|NAGA_HUMAN N-acetylglucosamine-6-phosphate deacetylase OS=Homo sapiens (Human) OX=9606 GN=AMDHD2 PE=1 SV=2	45	30	6	24	7	14	21	46	18	19	46	8	5	17	20	21	21	3	5	33	0	20	409
sp|Q6Q6R5|CRIP3_HUMAN Cysteine-rich protein 3 OS=Homo sapiens (Human) OX=9606 GN=CRIP3 PE=2 SV=2	6	12	6	3	17	5	8	26	15	2	13	10	5	9	28	15	10	6	9	12	0	20	217
sp|Q9NXF7|DCA16_HUMAN DDB1- and CUL4-associated factor 16 OS=Homo sapiens (Human) OX=9606 GN=DCAF16 PE=1 SV=1	9	8	10	6	8	6	19	7	6	7	27	12	2	3	22	27	17	6	6	8	0	20	216
sp|Q6ZS11|RINL_HUMAN Ras and Rab interactor-like protein OS=Homo sapiens (Human) OX=9606 GN=RINL PE=2 SV=2	51	50	8	35	4	27	47	43	21	11	74	13	3	7	59	29	31	10	9	34	0	20	566
sp|Q9P289|STK26_HUMAN Serine/threonine-protein kinase 26 OS=Homo sapiens (Human) OX=9606 GN=STK26 PE=1 SV=2	30	12	16	29	5	20	36	23	7	30	34	39	9	18	20	32	22	5	8	21	0	20	416
sp|Q8IVI9|NOSTN_HUMAN Nostrin OS=Homo sapiens (Human) OX=9606 GN=NOSTRIN PE=1 SV=2	35	19	31	19	9	29	46	18	10	21	57	60	11	12	14	52	26	7	15	15	0	20	506
sp|Q9HAR2|AGRL3_HUMAN Adhesion G protein-coupled receptor L3 OS=Homo sapiens (Human) OX=9606 GN=ADGRL3 PE=1 SV=2	90	69	85	78	33	46	75	85	43	84	142	60	32	51	72	126	107	20	62	87	0	20	1447
sp|Q15714|T22D1_HUMAN TSC22 domain family protein 1 OS=Homo sapiens (Human) OX=9606 GN=TSC22D1 PE=1 SV=3	105	14	43	19	1	126	41	80	26	47	69	20	19	12	116	160	76	1	8	90	0	20	1073
sp|Q96HJ5|MS4A3_HUMAN Membrane-spanning 4-domains subfamily A member 3 OS=Homo sapiens (Human) OX=9606 GN=MS4A3 PE=1 SV=1	19	3	13	4	7	8	9	16	5	16	22	4	6	11	10	27	12	3	7	12	0	20	214
sp|A0A1B0GTL2|CT204_HUMAN Uncharacterized protein C20orf204 OS=Homo sapiens (Human) OX=9606 GN=C20orf204 PE=3 SV=1	27	32	1	4	4	5	6	16	5	5	21	7	3	4	12	14	8	4	2	9	0	20	189
tr|A0A191URJ7|A0A191URJ7_HUMAN KIR2DL protein OS=Homo sapiens (Human) OX=9606 GN=KIR2DL1 PE=2 SV=1	18	19	10	17	9	14	19	25	15	12	35	12	7	16	29	40	20	5	11	27	0	20	360
sp|Q5JNZ5|RS26L_HUMAN Putative 40S ribosomal protein S26-like 1 OS=Homo sapiens (Human) OX=9606 GN=RPS26P11 PE=5 SV=1	11	14	5	4	6	1	3	3	4	6	3	12	2	3	12	6	4	0	3	13	0	19	115
sp|P49848|TAF6_HUMAN Transcription initiation factor TFIID subunit 6 OS=Homo sapiens (Human) OX=9606 GN=TAF6 PE=1 SV=1	59	28	16	22	11	40	39	44	11	31	68	42	11	13	74	59	48	4	14	43	0	20	677
sp|Q9H9H4|VP37B_HUMAN Vacuolar protein sorting-associated protein 37B OS=Homo sapiens (Human) OX=9606 GN=VPS37B PE=1 SV=1	27	15	6	7	1	25	22	15	2	6	41	14	8	8	41	16	12	0	7	12	0	19	285
sp|Q2M2I5|K1C24_HUMAN Keratin, type I cytoskeletal 24 OS=Homo sapiens (Human) OX=9606 GN=KRT24 PE=1 SV=1	39	30	20	25	9	23	45	81	2	21	41	23	11	18	2	73	24	2	14	22	0	20	525
sp|Q8IY85|EFC13_HUMAN EF-hand calcium-binding domain-containing protein 13 OS=Homo sapiens (Human) OX=9606 GN=EFCAB13 PE=2 SV=2	45	27	59	63	19	34	82	32	20	72	101	108	23	37	29	95	49	2	22	54	0	20	973
sp|Q86YH2|Z280B_HUMAN Zinc finger protein 280B OS=Homo sapiens (Human) OX=9606 GN=ZNF280B PE=1 SV=2	17	18	29	22	17	31	41	16	31	22	38	46	8	24	39	55	41	3	8	37	0	20	543
sp|Q96R45|OR2A7_HUMAN Olfactory receptor 2A7 OS=Homo sapiens (Human) OX=9606 GN=OR2A7 PE=2 SV=3	19	13	11	5	13	7	8	17	9	23	54	9	12	20	15	18	18	2	12	25	0	20	310
sp|Q9UBN6|TR10D_HUMAN Tumor necrosis factor receptor superfamily member 10D OS=Homo sapiens (Human) OX=9606 GN=TNFRSF10D PE=1 SV=1	29	27	11	14	19	20	31	28	4	16	31	16	4	7	23	35	30	2	8	31	0	20	386
sp|Q5TAQ9|DCAF8_HUMAN DDB1- and CUL4-associated factor 8 OS=Homo sapiens (Human) OX=9606 GN=DCAF8 PE=1 SV=1	35	43	24	49	12	22	56	43	24	13	43	30	8	19	22	63	31	9	11	40	0	20	597
sp|Q9UGU0|TCF20_HUMAN Transcription factor 20 OS=Homo sapiens (Human) OX=9606 GN=TCF20 PE=1 SV=3	124	108	75	70	26	167	119	190	60	42	115	119	40	42	188	253	88	8	52	74	0	20	1960
sp|Q96DC8|ECHD3_HUMAN Enoyl-CoA hydratase domain-containing protein 3, mitochondrial OS=Homo sapiens (Human) OX=9606 GN=ECHDC3 PE=1 SV=2	38	20	8	13	6	13	16	20	7	13	32	14	9	9	19	25	11	2	4	24	0	20	303
sp|Q9UQV4|LAMP3_HUMAN Lysosome-associated membrane glycoprotein 3 OS=Homo sapiens (Human) OX=9606 GN=LAMP3 PE=1 SV=3	42	12	14	14	6	29	11	24	13	20	28	17	7	14	32	34	57	0	12	30	0	19	416
sp|Q02223|TNR17_HUMAN Tumor necrosis factor receptor superfamily member 17 OS=Homo sapiens (Human) OX=9606 GN=TNFRSF17 PE=1 SV=2	12	6	9	8	12	5	13	9	2	12	23	11	5	5	9	17	14	1	4	7	0	20	184
tr|A0N4Z3|A0N4Z3_HUMAN HCG2039775 OS=Homo sapiens (Human) OX=9606 GN=TRAJ14 PE=4 SV=1	0	1	0	0	0	0	0	2	0	2	1	1	0	2	1	3	2	0	1	1	0	11	17
sp|O95475|SIX6_HUMAN Homeobox protein SIX6 OS=Homo sapiens (Human) OX=9606 GN=SIX6 PE=1 SV=2	26	21	9	8	4	14	19	15	7	7	26	15	1	8	14	17	12	5	6	12	0	20	246
sp|Q9UPY8|MARE3_HUMAN Microtubule-associated protein RP/EB family member 3 OS=Homo sapiens (Human) OX=9606 GN=MAPRE3 PE=1 SV=1	16	9	16	19	5	18	22	16	8	16	24	22	6	15	17	15	10	2	9	16	0	20	281
sp|Q96JS3|PGBD1_HUMAN PiggyBac transposable element-derived protein 1 OS=Homo sapiens (Human) OX=9606 GN=PGBD1 PE=1 SV=1	42	42	38	42	24	43	77	42	21	34	77	52	22	32	45	54	37	12	23	50	0	20	809
sp|P29622|KAIN_HUMAN Kallistatin OS=Homo sapiens (Human) OX=9606 GN=SERPINA4 PE=1 SV=3	26	17	17	21	3	14	23	22	19	20	60	27	10	29	16	35	25	4	14	25	0	20	427
sp|Q99584|S10AD_HUMAN Protein S100-A13 OS=Homo sapiens (Human) OX=9606 GN=S100A13 PE=1 SV=1	4	5	3	6	0	4	13	3	1	4	13	13	2	5	2	6	6	1	1	6	0	19	98
sp|Q96RJ3|TR13C_HUMAN Tumor necrosis factor receptor superfamily member 13C OS=Homo sapiens (Human) OX=9606 GN=TNFRSF13C PE=1 SV=1	25	15	0	8	4	5	9	19	2	3	23	4	1	2	28	11	11	2	0	12	0	18	184
sp|Q9UGL1|KDM5B_HUMAN Lysine-specific demethylase 5B OS=Homo sapiens (Human) OX=9606 GN=KDM5B PE=1 SV=3	100	98	51	84	55	71	133	68	36	55	176	105	36	46	101	106	67	25	38	93	0	20	1544
sp|Q8N4M7|CJ126_HUMAN Putative uncharacterized protein C10orf126 OS=Homo sapiens (Human) OX=9606 GN=C10orf126 PE=2 SV=2	14	6	4	6	6	13	11	12	4	5	21	6	2	13	13	13	6	7	4	6	0	20	172
sp|Q96N03|VTM2L_HUMAN V-set and transmembrane domain-containing protein 2-like protein OS=Homo sapiens (Human) OX=9606 GN=VSTM2L PE=1 SV=1	23	12	4	10	3	8	12	15	10	4	17	13	3	4	16	17	9	5	5	14	0	20	204
sp|Q6MZW2|FSTL4_HUMAN Follistatin-related protein 4 OS=Homo sapiens (Human) OX=9606 GN=FSTL4 PE=2 SV=3	50	45	28	51	22	42	45	64	30	42	91	32	14	30	45	68	48	11	20	64	0	20	842
sp|P22680|CP7A1_HUMAN Cytochrome P450 7A1 OS=Homo sapiens (Human) OX=9606 GN=CYP7A1 PE=1 SV=2	35	25	26	23	11	16	30	27	17	33	63	33	16	29	24	28	31	6	18	13	0	20	504
sp|Q9HBF5|ST20_HUMAN Suppressor of tumorigenicity 20 protein OS=Homo sapiens (Human) OX=9606 GN=ST20 PE=2 SV=2	4	3	2	1	3	2	6	4	0	4	9	6	3	6	3	4	11	1	3	4	0	19	79
sp|Q86SQ9|DHDDS_HUMAN Dehydrodolichyl diphosphate synthase complex subunit DHDDS OS=Homo sapiens (Human) OX=9606 GN=DHDDS PE=1 SV=3	25	27	12	14	8	22	28	16	9	14	45	19	8	14	8	21	12	8	7	16	0	20	333
sp|Q96BY6|DOC10_HUMAN Dedicator of cytokinesis protein 10 OS=Homo sapiens (Human) OX=9606 GN=DOCK10 PE=1 SV=3	136	104	114	124	43	102	153	78	62	119	203	163	51	110	92	189	125	16	76	126	0	20	2186
sp|Q96EP0|RNF31_HUMAN E3 ubiquitin-protein ligase RNF31 OS=Homo sapiens (Human) OX=9606 GN=RNF31 PE=1 SV=1	92	83	27	45	54	70	83	72	32	17	135	30	14	31	87	67	43	16	27	47	0	20	1072
sp|P23141|EST1_HUMAN Liver carboxylesterase 1 OS=Homo sapiens (Human) OX=9606 GN=CES1 PE=1 SV=2	46	16	20	23	5	22	37	45	13	24	63	38	16	27	39	35	32	12	14	40	0	20	567
sp|Q6ZRY4|RBPS2_HUMAN RNA-binding protein with multiple splicing 2 OS=Homo sapiens (Human) OX=9606 GN=RBPMS2 PE=1 SV=1	30	10	7	7	1	6	11	18	5	7	19	10	4	10	18	13	15	3	8	7	0	20	209
sp|Q9NUD7|CT096_HUMAN Uncharacterized protein C20orf96 OS=Homo sapiens (Human) OX=9606 GN=C20orf96 PE=2 SV=2	13	24	10	15	4	35	38	4	9	17	40	34	13	10	19	25	21	4	6	22	0	20	363
sp|Q13838|DX39B_HUMAN Spliceosome RNA helicase DDX39B OS=Homo sapiens (Human) OX=9606 GN=DDX39B PE=1 SV=1	26	25	16	32	8	23	35	21	11	26	41	29	15	24	15	20	15	0	10	36	0	19	428
sp|Q86U44|MTA70_HUMAN N6-adenosine-methyltransferase catalytic subunit OS=Homo sapiens (Human) OX=9606 GN=METTL3 PE=1 SV=2	42	34	16	43	13	29	38	36	19	27	58	36	11	15	33	46	35	8	9	32	0	20	580
sp|Q8IXH7|NELFD_HUMAN Negative elongation factor C/D OS=Homo sapiens (Human) OX=9606 GN=NELFCD PE=1 SV=2	48	19	18	32	11	33	50	29	20	30	66	30	16	24	24	35	36	7	17	45	0	20	590
sp|Q9UN73|PCDA6_HUMAN Protocadherin alpha-6 OS=Homo sapiens (Human) OX=9606 GN=PCDHA6 PE=2 SV=1	83	45	45	61	12	33	65	66	17	38	100	42	10	29	62	86	44	7	22	83	0	20	950
sp|O14656|TOR1A_HUMAN Torsin-1A OS=Homo sapiens (Human) OX=9606 GN=TOR1A PE=1 SV=1	22	14	14	23	6	9	17	21	9	23	40	24	7	21	11	21	10	4	15	21	0	20	332
sp|Q9BPX6|MICU1_HUMAN Calcium uptake protein 1, mitochondrial OS=Homo sapiens (Human) OX=9606 GN=MICU1 PE=1 SV=1	30	29	15	30	7	22	35	33	11	20	42	41	18	33	15	29	27	4	10	25	0	20	476
sp|Q96GQ7|DDX27_HUMAN Probable ATP-dependent RNA helicase DDX27 OS=Homo sapiens (Human) OX=9606 GN=DDX27 PE=1 SV=2	73	62	20	45	9	40	79	49	13	36	72	86	21	29	29	37	40	2	9	45	0	20	796
sp|P21583|SCF_HUMAN Kit ligand OS=Homo sapiens (Human) OX=9606 GN=KITLG PE=1 SV=1	13	11	16	17	5	7	18	6	2	16	29	22	7	14	15	31	13	4	5	22	0	20	273
sp|Q68BL8|OLM2B_HUMAN Olfactomedin-like protein 2B OS=Homo sapiens (Human) OX=9606 GN=OLFML2B PE=2 SV=2	63	43	38	46	12	38	54	37	14	31	63	30	11	18	46	52	59	12	32	51	0	20	750
sp|Q96NW7|LRRC7_HUMAN Leucine-rich repeat-containing protein 7 OS=Homo sapiens (Human) OX=9606 GN=LRRC7 PE=1 SV=1	67	85	86	79	22	99	108	83	33	63	156	91	36	47	125	148	85	14	35	75	0	20	1537
sp|Q9UHF7|TRPS1_HUMAN Zinc finger transcription factor Trps1 OS=Homo sapiens (Human) OX=9606 GN=TRPS1 PE=1 SV=2	65	53	68	68	39	73	83	90	51	40	99	99	14	39	84	143	65	7	36	65	0	20	1281
sp|Q96RD9|FCRL5_HUMAN Fc receptor-like protein 5 OS=Homo sapiens (Human) OX=9606 GN=FCRL5 PE=1 SV=3	76	54	36	30	23	32	57	69	32	34	103	28	5	38	65	114	61	12	34	74	0	20	977
sp|Q8N6C8|LIRA3_HUMAN Leukocyte immunoglobulin-like receptor subfamily A member 3 OS=Homo sapiens (Human) OX=9606 GN=LILRA3 PE=1 SV=3	27	22	7	15	12	22	20	40	11	14	47	17	3	11	39	53	27	7	18	27	0	20	439
sp|B4DX44|ZN736_HUMAN Zinc finger protein 736 OS=Homo sapiens (Human) OX=9606 GN=ZNF736 PE=2 SV=2	16	24	14	17	34	10	36	24	28	16	27	57	4	24	12	28	25	5	14	12	0	20	427
sp|P19113|DCHS_HUMAN Histidine decarboxylase OS=Homo sapiens (Human) OX=9606 GN=HDC PE=1 SV=2	50	38	17	34	19	27	36	38	18	31	67	37	20	33	40	57	31	12	14	43	0	20	662
sp|Q9H2X8|I27L2_HUMAN Interferon alpha-inducible protein 27-like protein 2 OS=Homo sapiens (Human) OX=9606 GN=IFI27L2 PE=2 SV=1	27	2	4	1	1	2	9	16	1	4	11	6	5	1	9	17	3	0	0	11	0	18	130
sp|P04179|SODM_HUMAN Superoxide dismutase [Mn], mitochondrial OS=Homo sapiens (Human) OX=9606 GN=SOD2 PE=1 SV=3	19	7	14	8	3	12	12	22	10	11	24	15	3	6	11	10	8	6	10	11	0	20	222
sp|O75643|U520_HUMAN U5 small nuclear ribonucleoprotein 200 kDa helicase OS=Homo sapiens (Human) OX=9606 GN=SNRNP200 PE=1 SV=2	126	123	81	135	29	102	173	102	57	130	248	137	61	73	85	121	115	20	73	145	0	20	2136
sp|Q06033|ITIH3_HUMAN Inter-alpha-trypsin inhibitor heavy chain H3 OS=Homo sapiens (Human) OX=9606 GN=ITIH3 PE=1 SV=2	56	37	48	56	5	34	63	61	21	43	77	59	22	47	39	52	59	8	29	74	0	20	890
sp|P61009|SPCS3_HUMAN Signal peptidase complex subunit 3 OS=Homo sapiens (Human) OX=9606 GN=SPCS3 PE=1 SV=1	9	8	14	12	1	2	5	10	2	8	22	11	4	14	7	13	14	3	5	16	0	20	180
sp|P56178|DLX5_HUMAN Homeobox protein DLX-5 OS=Homo sapiens (Human) OX=9606 GN=DLX5 PE=1 SV=2	29	12	11	6	2	18	12	17	12	6	16	14	6	6	31	44	15	3	19	10	0	20	289
sp|Q9BYF1|ACE2_HUMAN Angiotensin-converting enzyme 2 OS=Homo sapiens (Human) OX=9606 GN=ACE2 PE=1 SV=2	51	31	54	43	8	38	56	43	16	40	76	47	27	39	37	54	39	23	33	50	0	20	805
sp|Q96BH1|RNF25_HUMAN E3 ubiquitin-protein ligase RNF25 OS=Homo sapiens (Human) OX=9606 GN=RNF25 PE=1 SV=1	32	31	6	14	11	40	46	34	14	18	37	22	6	5	51	29	22	5	15	21	0	20	459
sp|Q5T7M4|ADIPL_HUMAN Adipolin OS=Homo sapiens (Human) OX=9606 GN=C1QTNF12 PE=1 SV=2	32	27	4	11	6	20	16	32	7	4	40	7	2	14	19	24	12	3	1	21	0	20	302
sp|Q9BUJ0|ABHEA_HUMAN Protein ABHD14A OS=Homo sapiens (Human) OX=9606 GN=ABHD14A PE=2 SV=2	22	15	9	6	4	14	11	22	14	5	50	5	4	9	20	17	13	4	7	20	0	20	271
sp|O14920|IKKB_HUMAN Inhibitor of nuclear factor kappa-B kinase subunit beta OS=Homo sapiens (Human) OX=9606 GN=IKBKB PE=1 SV=1	38	45	33	36	18	61	67	37	13	34	97	43	22	18	33	52	40	15	14	40	0	20	756
sp|A0AVF1|IFT56_HUMAN Intraflagellar transport protein 56 OS=Homo sapiens (Human) OX=9606 GN=TTC26 PE=2 SV=1	45	29	29	27	11	26	45	28	12	28	65	40	16	27	13	30	17	6	33	27	0	20	554
sp|P15036|ETS2_HUMAN Protein C-ets-2 OS=Homo sapiens (Human) OX=9606 GN=ETS2 PE=1 SV=1	19	16	27	28	10	31	32	29	7	13	50	26	11	25	28	49	22	11	12	23	0	20	469
sp|Q6NT04|TIGD7_HUMAN Tigger transposable element-derived protein 7 OS=Homo sapiens (Human) OX=9606 GN=TIGD7 PE=1 SV=1	26	30	20	31	10	23	48	33	11	29	50	60	10	31	18	44	23	10	13	29	0	20	549
sp|Q8IZ40|RCOR2_HUMAN REST corepressor 2 OS=Homo sapiens (Human) OX=9606 GN=RCOR2 PE=1 SV=2	37	40	14	24	3	28	38	33	11	15	50	29	11	12	71	41	23	6	11	26	0	20	523
sp|Q8NBN7|RDH13_HUMAN Retinol dehydrogenase 13 OS=Homo sapiens (Human) OX=9606 GN=RDH13 PE=1 SV=2	39	20	12	13	5	8	23	26	11	17	41	18	4	9	14	20	21	4	6	20	0	20	331
sp|Q8NEE8|TTC16_HUMAN Tetratricopeptide repeat protein 16 OS=Homo sapiens (Human) OX=9606 GN=TTC16 PE=2 SV=2	76	59	26	36	15	86	61	44	18	22	94	58	16	28	36	82	52	6	25	33	0	20	873
sp|O15553|MEFV_HUMAN Pyrin OS=Homo sapiens (Human) OX=9606 GN=MEFV PE=1 SV=1	55	55	19	31	17	46	68	61	19	31	71	49	9	21	60	67	36	6	19	41	0	20	781
sp|O00230|CORT_HUMAN Cortistatin OS=Homo sapiens (Human) OX=9606 GN=CORT PE=1 SV=1	13	9	1	2	2	5	8	9	1	2	13	3	3	5	8	10	6	4	0	1	0	19	105
sp|Q6ZRH7|CTSRG_HUMAN Cation channel sperm-associated protein subunit gamma OS=Homo sapiens (Human) OX=9606 GN=CATSPERG PE=2 SV=3	47	53	45	46	24	47	70	70	26	64	119	47	37	70	59	105	61	24	64	81	0	20	1159
sp|P04921|GLPC_HUMAN Glycophorin-C OS=Homo sapiens (Human) OX=9606 GN=GYPC PE=1 SV=1	15	5	2	8	0	2	7	9	3	7	8	3	8	3	9	12	13	3	4	7	0	19	128
sp|Q8N9I9|DTX3_HUMAN Probable E3 ubiquitin-protein ligase DTX3 OS=Homo sapiens (Human) OX=9606 GN=DTX3 PE=1 SV=2	23	23	9	10	12	15	23	33	7	12	38	20	7	9	41	13	23	2	10	17	0	20	347
sp|P22309|UD11_HUMAN UDP-glucuronosyltransferase 1-1 OS=Homo sapiens (Human) OX=9606 GN=UGT1A1 PE=1 SV=1	37	20	20	23	11	19	24	30	21	23	64	30	20	27	31	42	22	6	17	46	0	20	533
sp|Q5TGI0|FAXC_HUMAN Failed axon connections homolog OS=Homo sapiens (Human) OX=9606 GN=FAXC PE=2 SV=2	22	18	14	25	6	10	32	34	15	21	41	22	15	22	17	30	21	13	16	15	0	20	409
sp|Q9NPJ4|PNRC2_HUMAN Proline-rich nuclear receptor coactivator 2 OS=Homo sapiens (Human) OX=9606 GN=PNRC2 PE=1 SV=1	8	5	15	1	0	14	5	9	3	3	8	15	4	5	12	16	3	3	3	7	0	19	139
sp|Q9NPC7|MYNN_HUMAN Myoneurin OS=Homo sapiens (Human) OX=9606 GN=MYNN PE=1 SV=1	33	23	30	27	24	32	42	29	28	25	51	56	9	24	24	56	43	1	19	34	0	20	610
sp|Q5I0X4|CF226_HUMAN Uncharacterized protein C6orf226 OS=Homo sapiens (Human) OX=9606 GN=C6orf226 PE=1 SV=1	17	7	0	0	1	6	8	6	3	3	11	2	1	0	15	9	6	2	0	4	0	16	101
sp|Q12950|FOXD4_HUMAN Forkhead box protein D4 OS=Homo sapiens (Human) OX=9606 GN=FOXD4 PE=2 SV=4	52	42	9	17	10	21	24	39	14	10	43	11	3	13	53	38	13	4	9	14	0	20	439
sp|O94777|DPM2_HUMAN Dolichol phosphate-mannose biosynthesis regulatory protein OS=Homo sapiens (Human) OX=9606 GN=DPM2 PE=1 SV=3	9	2	0	2	0	3	0	5	2	7	14	5	2	5	3	3	6	1	5	10	0	17	84
sp|Q7L4E1|MIGA2_HUMAN Mitoguardin 2 OS=Homo sapiens (Human) OX=9606 GN=MIGA2 PE=1 SV=1	52	40	10	26	7	24	48	40	9	12	80	24	19	29	32	61	30	5	13	32	0	20	593
sp|O43310|CTIF_HUMAN CBP80/20-dependent translation initiation factor OS=Homo sapiens (Human) OX=9606 GN=CTIF PE=1 SV=1	33	43	23	35	10	36	52	37	20	21	55	34	18	17	36	52	39	7	9	21	0	20	598
sp|Q99536|VAT1_HUMAN Synaptic vesicle membrane protein VAT-1 homolog OS=Homo sapiens (Human) OX=9606 GN=VAT1 PE=1 SV=2	46	15	14	18	4	14	23	37	9	9	40	20	15	10	28	18	20	4	10	39	0	20	393
sp|Q8TBP6|S2540_HUMAN Solute carrier family 25 member 40 OS=Homo sapiens (Human) OX=9606 GN=SLC25A40 PE=1 SV=1	21	12	12	8	8	15	15	22	4	26	32	26	11	18	18	24	21	9	12	24	0	20	338
sp|Q3LI66|KRA62_HUMAN Keratin-associated protein 6-2 OS=Homo sapiens (Human) OX=9606 GN=KRTAP6-2 PE=1 SV=1	0	2	1	1	9	0	1	20	2	0	2	0	1	2	0	6	0	0	15	0	0	12	62
sp|Q9UJ71|CLC4K_HUMAN C-type lectin domain family 4 member K OS=Homo sapiens (Human) OX=9606 GN=CD207 PE=1 SV=2	21	11	19	13	5	17	20	18	3	17	32	25	6	12	19	29	19	9	9	24	0	20	328
sp|Q6P5Z2|PKN3_HUMAN Serine/threonine-protein kinase N3 OS=Homo sapiens (Human) OX=9606 GN=PKN3 PE=1 SV=1	73	74	12	30	19	55	74	61	20	22	118	41	13	36	80	44	44	11	11	51	0	20	889
sp|Q96H78|S2544_HUMAN Solute carrier family 25 member 44 OS=Homo sapiens (Human) OX=9606 GN=SLC25A44 PE=2 SV=1	20	19	7	10	3	17	13	24	6	24	28	17	10	15	12	22	20	5	14	28	0	20	314
sp|O60676|CST8_HUMAN Cystatin-8 OS=Homo sapiens (Human) OX=9606 GN=CST8 PE=1 SV=1	10	7	9	5	6	6	11	3	0	6	20	15	3	4	6	8	6	3	3	11	0	19	142
tr|A0A075B7E8|A0A075B7E8_HUMAN Ig-like domain-containing protein OS=Homo sapiens (Human) OX=9606 GN=IGHV3OR16-13 PE=1 SV=1	8	6	4	4	3	6	4	12	1	3	11	4	5	5	2	15	5	4	5	10	0	20	117
sp|Q9GZR2|REXO4_HUMAN RNA exonuclease 4 OS=Homo sapiens (Human) OX=9606 GN=REXO4 PE=1 SV=2	39	25	8	21	4	22	33	28	7	15	27	58	10	6	33	30	14	5	6	31	0	20	422
sp|Q00534|CDK6_HUMAN Cyclin-dependent kinase 6 OS=Homo sapiens (Human) OX=9606 GN=CDK6 PE=1 SV=1	19	22	7	23	6	14	22	18	9	12	39	18	6	16	17	20	19	3	8	28	0	20	326
sp|Q8WXA8|5HT3C_HUMAN 5-hydroxytryptamine receptor 3C OS=Homo sapiens (Human) OX=9606 GN=HTR3C PE=1 SV=2	23	16	19	21	9	16	17	27	6	25	65	16	16	26	29	32	33	11	13	27	0	20	447
sp|Q14576|ELAV3_HUMAN ELAV-like protein 3 OS=Homo sapiens (Human) OX=9606 GN=ELAVL3 PE=2 SV=3	31	16	20	16	3	19	13	39	4	21	35	22	9	16	16	29	22	2	12	22	0	20	367
sp|Q0VDE8|ADIG_HUMAN Adipogenin OS=Homo sapiens (Human) OX=9606 GN=ADIG PE=3 SV=1	1	2	2	4	4	2	6	4	1	2	15	4	2	6	6	6	2	6	1	4	0	20	80
sp|Q9Y2U9|KLDC2_HUMAN Kelch domain-containing protein 2 OS=Homo sapiens (Human) OX=9606 GN=KLHDC2 PE=1 SV=1	21	22	23	23	11	9	23	34	18	15	34	16	8	21	21	34	20	15	14	24	0	20	406
sp|P17035|ZNF28_HUMAN Zinc finger protein 28 OS=Homo sapiens (Human) OX=9606 GN=ZNF28 PE=1 SV=5	28	42	30	21	46	32	57	38	60	27	45	83	10	31	23	50	41	2	27	25	0	20	718
sp|P31314|TLX1_HUMAN T-cell leukemia homeobox protein 1 OS=Homo sapiens (Human) OX=9606 GN=TLX1 PE=1 SV=1	39	19	11	8	6	19	13	49	10	7	28	13	7	8	28	21	20	4	8	12	0	20	330
sp|P0C880|YT014_HUMAN Putative uncharacterized protein FLJ40606 OS=Homo sapiens (Human) OX=9606 GN=- PE=5 SV=1	21	22	0	2	7	3	3	12	2	2	10	1	1	1	23	10	9	2	0	4	0	18	135
sp|Q6NVV9|ADAM5_HUMAN Putative disintegrin and metalloproteinase domain-containing protein 5 OS=Homo sapiens (Human) OX=9606 GN=ADAM5 PE=5 SV=2	12	24	24	27	26	16	22	27	16	26	25	20	12	19	21	31	19	2	22	21	0	20	412
sp|P30531|SC6A1_HUMAN Sodium- and chloride-dependent GABA transporter 1 OS=Homo sapiens (Human) OX=9606 GN=SLC6A1 PE=1 SV=2	42	18	23	19	14	18	17	50	3	48	59	23	21	44	28	45	31	20	30	46	0	20	599
sp|Q8N461|FXL16_HUMAN F-box/LRR-repeat protein 16 OS=Homo sapiens (Human) OX=9606 GN=FBXL16 PE=2 SV=2	42	22	15	20	20	15	25	36	10	14	77	18	6	13	35	37	28	7	10	29	0	20	479
sp|Q5NUL3|FFAR4_HUMAN Free fatty acid receptor 4 OS=Homo sapiens (Human) OX=9606 GN=FFAR4 PE=1 SV=2	34	27	10	11	11	10	12	15	6	29	55	9	6	24	16	28	21	10	5	38	0	20	377
sp|O15040|TCPR2_HUMAN Tectonin beta-propeller repeat-containing protein 2 OS=Homo sapiens (Human) OX=9606 GN=TECPR2 PE=1 SV=4	97	60	38	76	35	77	81	110	31	53	142	59	19	42	84	161	82	36	29	99	0	20	1411
sp|P23771|GATA3_HUMAN Trans-acting T-cell-specific transcription factor GATA-3 OS=Homo sapiens (Human) OX=9606 GN=GATA3 PE=1 SV=1	25	22	18	14	12	11	10	36	31	7	35	21	12	10	51	62	30	5	14	17	0	20	443
sp|Q9UMX9|S45A2_HUMAN Membrane-associated transporter protein OS=Homo sapiens (Human) OX=9606 GN=SLC45A2 PE=1 SV=2	38	22	15	18	13	15	20	51	13	25	65	16	18	32	25	38	27	6	26	47	0	20	530
sp|O60883|G37L1_HUMAN G-protein coupled receptor 37-like 1 OS=Homo sapiens (Human) OX=9606 GN=GPR37L1 PE=1 SV=2	36	22	13	10	24	21	26	32	7	21	62	15	9	17	34	40	29	11	14	38	0	20	481
sp|O94966|UBP19_HUMAN Ubiquitin carboxyl-terminal hydrolase 19 OS=Homo sapiens (Human) OX=9606 GN=USP19 PE=1 SV=2	103	85	36	68	33	62	100	87	32	32	126	61	16	50	110	105	67	18	28	99	0	20	1318
sp|Q8WVJ9|TWST2_HUMAN Twist-related protein 2 OS=Homo sapiens (Human) OX=9606 GN=TWIST2 PE=1 SV=1	11	14	3	6	1	9	14	8	2	5	13	12	5	5	8	25	6	2	5	6	0	20	160
sp|O95935|TBX18_HUMAN T-box transcription factor TBX18 OS=Homo sapiens (Human) OX=9606 GN=TBX18 PE=1 SV=3	51	34	18	25	9	31	24	61	16	20	46	24	18	21	49	77	35	4	17	27	0	20	607
sp|Q8TAF3|WDR48_HUMAN WD repeat-containing protein 48 OS=Homo sapiens (Human) OX=9606 GN=WDR48 PE=1 SV=1	41	33	42	51	15	26	35	39	20	35	63	49	14	16	25	44	47	15	17	50	0	20	677
sp|Q6PEY0|CXB7_HUMAN Gap junction beta-7 protein OS=Homo sapiens (Human) OX=9606 GN=GJB7 PE=2 SV=1	6	7	5	8	11	6	9	11	4	14	31	18	5	17	9	14	9	6	10	23	0	20	223
sp|J3KSC0|CR064_HUMAN Putative uncharacterized protein encoded by LINC01387 OS=Homo sapiens (Human) OX=9606 GN=LINC01387 PE=5 SV=1	6	11	3	5	5	8	10	9	2	6	19	5	1	3	13	13	3	2	0	11	0	19	135
sp|P0C617|O5AL1_HUMAN Olfactory receptor 5AL1 OS=Homo sapiens (Human) OX=9606 GN=OR5AL1 PE=3 SV=1	22	6	15	8	12	8	10	12	9	30	42	13	8	27	10	27	20	0	18	31	0	19	328
sp|Q8WWI5|CTL1_HUMAN Choline transporter-like protein 1 OS=Homo sapiens (Human) OX=9606 GN=SLC44A1 PE=1 SV=1	52	25	24	18	27	18	23	36	9	52	83	34	20	38	25	48	35	13	23	54	0	20	657
sp|Q8N9I5|FADS6_HUMAN Fatty acid desaturase 6 OS=Homo sapiens (Human) OX=9606 GN=FADS6 PE=2 SV=2	26	22	10	7	8	6	23	19	19	12	55	10	12	18	22	23	19	8	10	27	0	20	356
sp|Q9H9Q4|NHEJ1_HUMAN Non-homologous end-joining factor 1 OS=Homo sapiens (Human) OX=9606 GN=NHEJ1 PE=1 SV=1	23	12	8	13	7	25	21	14	8	8	44	15	9	10	18	26	13	4	4	17	0	20	299
sp|P29372|3MG_HUMAN DNA-3-methyladenine glycosylase OS=Homo sapiens (Human) OX=9606 GN=MPG PE=1 SV=3	31	30	4	11	7	18	18	25	5	6	27	12	8	9	26	20	12	3	8	18	0	20	298
sp|Q0PNE2|ELP6_HUMAN Elongator complex protein 6 OS=Homo sapiens (Human) OX=9606 GN=ELP6 PE=1 SV=1	20	13	9	15	6	13	14	17	10	7	38	13	5	16	9	18	9	3	6	25	0	20	266
sp|Q9BQI9|NRIP2_HUMAN Nuclear receptor-interacting protein 2 OS=Homo sapiens (Human) OX=9606 GN=NRIP2 PE=1 SV=3	18	25	4	13	9	25	19	18	4	6	39	12	3	6	24	23	14	4	2	13	0	20	281
sp|Q9NYA4|MTMR4_HUMAN Myotubularin-related protein 4 OS=Homo sapiens (Human) OX=9606 GN=MTMR4 PE=1 SV=2	72	62	52	68	53	60	80	67	39	33	111	54	21	41	89	115	52	22	28	76	0	20	1195
sp|P33176|KINH_HUMAN Kinesin-1 heavy chain OS=Homo sapiens (Human) OX=9606 GN=KIF5B PE=1 SV=1	70	53	51	55	13	67	107	39	20	46	85	98	22	18	18	62	52	3	21	63	0	20	963
sp|Q13474|DRP2_HUMAN Dystrophin-related protein 2 OS=Homo sapiens (Human) OX=9606 GN=DRP2 PE=2 SV=2	72	53	29	45	21	69	81	40	39	35	105	46	20	31	50	93	45	14	17	52	0	20	957
sp|O95727|CRTAM_HUMAN Cytotoxic and regulatory T-cell molecule OS=Homo sapiens (Human) OX=9606 GN=CRTAM PE=1 SV=2	13	15	18	12	6	19	36	14	13	22	43	29	7	11	16	41	37	6	9	26	0	20	393
sp|Q9UN79|SOX13_HUMAN Transcription factor SOX-13 OS=Homo sapiens (Human) OX=9606 GN=SOX13 PE=1 SV=3	45	36	18	32	9	52	47	32	18	20	56	36	23	10	62	61	19	4	13	29	0	20	622
sp|Q96T37|RBM15_HUMAN RNA-binding protein 15 OS=Homo sapiens (Human) OX=9606 GN=RBM15 PE=1 SV=2	71	118	19	71	4	28	48	97	18	23	88	49	8	23	75	117	43	8	27	42	0	20	977
sp|O00425|IF2B3_HUMAN Insulin-like growth factor 2 mRNA-binding protein 3 OS=Homo sapiens (Human) OX=9606 GN=IGF2BP3 PE=1 SV=2	45	26	24	19	6	42	45	39	12	46	45	47	8	16	41	38	30	2	10	38	0	20	579
sp|Q96MT7|CFA44_HUMAN Cilia- and flagella-associated protein 44 OS=Homo sapiens (Human) OX=9606 GN=CFAP44 PE=1 SV=2	87	90	72	111	22	87	218	90	36	123	177	175	46	78	73	121	87	18	49	94	0	20	1854
sp|Q9NX00|TM160_HUMAN Transmembrane protein 160 OS=Homo sapiens (Human) OX=9606 GN=TMEM160 PE=1 SV=1	30	16	1	7	2	4	9	28	2	2	24	1	5	7	14	13	3	7	3	10	0	20	188
sp|Q6ZUT6|CCD9B_HUMAN Coiled-coil domain-containing protein 9B OS=Homo sapiens (Human) OX=9606 GN=CCDC9B PE=1 SV=1	52	58	6	21	9	37	47	64	5	10	37	21	8	2	52	47	22	11	2	23	0	20	534
sp|P0DN25|C1C1L_HUMAN C1GALT1-specific chaperone 1-like protein OS=Homo sapiens (Human) OX=9606 GN=C1GALT1C1L PE=3 SV=1	16	14	19	18	6	11	23	18	10	17	33	16	9	19	9	19	18	6	14	20	0	20	315
sp|P12111|CO6A3_HUMAN Collagen alpha-3(VI) chain OS=Homo sapiens (Human) OX=9606 GN=COL6A3 PE=1 SV=5	235	189	130	183	30	147	183	303	45	153	282	158	37	149	209	217	167	6	62	292	0	20	3177
sp|Q7Z7H8|RM10_HUMAN 39S ribosomal protein L10, mitochondrial OS=Homo sapiens (Human) OX=9606 GN=MRPL10 PE=1 SV=3	15	18	7	10	4	18	12	14	8	12	39	14	10	7	23	14	12	0	5	19	0	19	261
sp|Q8N4N3|KLH36_HUMAN Kelch-like protein 36 OS=Homo sapiens (Human) OX=9606 GN=KLHL36 PE=1 SV=1	43	42	23	36	17	28	44	44	17	26	60	26	11	22	21	47	23	12	29	45	0	20	616
sp|P78545|ELF3_HUMAN ETS-related transcription factor Elf-3 OS=Homo sapiens (Human) OX=9606 GN=ELF3 PE=1 SV=1	25	20	11	28	7	15	27	31	8	10	35	26	8	15	18	42	13	9	11	12	0	20	371
sp|P27694|RFA1_HUMAN Replication protein A 70 kDa DNA-binding subunit OS=Homo sapiens (Human) OX=9606 GN=RPA1 PE=1 SV=2	43	30	37	33	11	29	38	43	4	35	43	41	14	25	27	54	35	6	20	48	0	20	616
sp|Q9UKJ3|GPTC8_HUMAN G patch domain-containing protein 8 OS=Homo sapiens (Human) OX=9606 GN=GPATCH8 PE=1 SV=2	109	101	28	93	16	72	119	115	68	42	90	128	13	34	122	218	66	4	31	33	0	20	1502
sp|Q8WV74|NUDT8_HUMAN Nucleoside diphosphate-linked moiety X motif 8 OS=Homo sapiens (Human) OX=9606 GN=NUDT8 PE=1 SV=2	24	19	3	8	7	10	12	22	8	1	36	5	1	6	22	12	14	2	5	19	0	20	236
sp|P04440|DPB1_HUMAN HLA class II histocompatibility antigen, DP beta 1 chain OS=Homo sapiens (Human) OX=9606 GN=HLA-DPB1 PE=1 SV=1	16	21	10	9	5	17	16	20	6	8	23	8	8	11	11	15	17	4	8	25	0	20	258
sp|Q8IZV5|RDH10_HUMAN Retinol dehydrogenase 10 OS=Homo sapiens (Human) OX=9606 GN=RDH10 PE=1 SV=1	32	18	14	11	12	8	25	22	10	17	33	18	12	18	13	12	20	4	9	33	0	20	341
sp|O95149|SPN1_HUMAN Snurportin-1 OS=Homo sapiens (Human) OX=9606 GN=SNUPN PE=1 SV=1	15	16	13	21	8	14	28	21	14	7	38	27	11	11	21	34	17	6	17	21	0	20	360
sp|Q5HYL7|TM196_HUMAN Transmembrane protein 196 OS=Homo sapiens (Human) OX=9606 GN=TMEM196 PE=2 SV=2	10	7	4	2	11	5	8	19	6	13	25	7	6	7	4	23	6	2	2	11	0	20	178
sp|O00445|SYT5_HUMAN Synaptotagmin-5 OS=Homo sapiens (Human) OX=9606 GN=SYT5 PE=1 SV=2	28	27	8	21	6	21	20	31	8	11	41	25	6	12	33	21	13	4	14	36	0	20	386
sp|Q00526|CDK3_HUMAN Cyclin-dependent kinase 3 OS=Homo sapiens (Human) OX=9606 GN=CDK3 PE=1 SV=1	16	19	6	14	2	13	21	18	9	17	41	20	7	15	19	17	16	4	12	19	0	20	305
sp|Q8NGN3|O10G4_HUMAN Olfactory receptor 10G4 OS=Homo sapiens (Human) OX=9606 GN=OR10G4 PE=3 SV=1	21	14	7	11	12	6	2	15	10	20	42	8	11	19	15	26	21	2	15	34	0	20	311
sp|Q9BS91|S35A5_HUMAN Probable UDP-sugar transporter protein SLC35A5 OS=Homo sapiens (Human) OX=9606 GN=SLC35A5 PE=1 SV=2	25	18	21	14	11	14	21	16	9	30	52	22	8	38	13	41	23	7	13	28	0	20	424
sp|Q9UBB9|TFP11_HUMAN Tuftelin-interacting protein 11 OS=Homo sapiens (Human) OX=9606 GN=TFIP11 PE=1 SV=1	42	40	31	56	7	48	74	49	21	44	71	65	26	32	45	57	28	25	26	50	0	20	837
sp|O75410|TACC1_HUMAN Transforming acidic coiled-coil-containing protein 1 OS=Homo sapiens (Human) OX=9606 GN=TACC1 PE=1 SV=2	65	29	22	46	15	35	99	48	12	31	63	68	10	23	49	95	46	6	8	35	0	20	805
sp|Q9NVK5|FGOP2_HUMAN FGFR1 oncogene partner 2 OS=Homo sapiens (Human) OX=9606 GN=FGFR1OP2 PE=1 SV=1	20	21	10	13	2	22	33	6	9	16	29	17	10	5	3	18	9	0	2	8	0	19	253
sp|Q9NQ31|AKIP1_HUMAN A-kinase-interacting protein 1 OS=Homo sapiens (Human) OX=9606 GN=AKIP1 PE=1 SV=2	20	17	5	10	4	8	16	17	7	4	17	11	5	3	13	18	9	1	9	16	0	20	210
sp|O60309|L37A3_HUMAN Leucine-rich repeat-containing protein 37A3 OS=Homo sapiens (Human) OX=9606 GN=LRRC37A3 PE=2 SV=2	92	48	65	50	20	111	154	64	55	62	163	82	26	41	174	152	147	16	24	88	0	20	1634
sp|Q15466|NR0B2_HUMAN Nuclear receptor subfamily 0 group B member 2 OS=Homo sapiens (Human) OX=9606 GN=NR0B2 PE=1 SV=2	24	16	2	9	12	17	11	16	5	9	44	7	2	8	24	21	9	6	2	13	0	20	257
sp|Q7LFX5|CHSTF_HUMAN Carbohydrate sulfotransferase 15 OS=Homo sapiens (Human) OX=9606 GN=CHST15 PE=1 SV=1	34	32	31	31	12	26	27	26	24	27	61	32	15	33	29	39	27	10	22	23	0	20	561
sp|Q9ULM6|CNOT6_HUMAN CCR4-NOT transcription complex subunit 6 OS=Homo sapiens (Human) OX=9606 GN=CNOT6 PE=1 SV=2	25	26	34	23	8	19	38	32	18	27	77	33	15	22	30	46	30	7	21	26	0	20	557
sp|A5PLN7|F149A_HUMAN Protein FAM149A OS=Homo sapiens (Human) OX=9606 GN=FAM149A PE=2 SV=2	73	63	12	33	9	29	41	70	24	13	70	29	8	21	68	93	57	11	10	39	0	20	773
sp|P19447|ERCC3_HUMAN General transcription and DNA repair factor IIH helicase subunit XPB OS=Homo sapiens (Human) OX=9606 GN=ERCC3 PE=1 SV=1	54	48	22	48	14	37	63	40	18	39	60	61	22	33	32	57	42	8	30	54	0	20	782
sp|Q8NGD0|OR4M1_HUMAN Olfactory receptor 4M1 OS=Homo sapiens (Human) OX=9606 GN=OR4M1 PE=2 SV=1	21	13	10	8	12	5	12	12	7	32	41	11	12	24	12	22	18	2	14	25	0	20	313
sp|P11926|DCOR_HUMAN Ornithine decarboxylase OS=Homo sapiens (Human) OX=9606 GN=ODC1 PE=1 SV=2	40	18	17	34	12	16	28	30	8	24	33	29	13	24	22	33	21	5	17	37	0	20	461
sp|Q9BZQ2|SHP1L_HUMAN Testicular spindle-associated protein SHCBP1L OS=Homo sapiens (Human) OX=9606 GN=SHCBP1L PE=1 SV=3	50	32	26	40	13	18	58	39	10	42	59	46	18	18	30	45	33	8	16	52	0	20	653
sp|Q9UHQ9|NB5R1_HUMAN NADH-cytochrome b5 reductase 1 OS=Homo sapiens (Human) OX=9606 GN=CYB5R1 PE=1 SV=1	13	17	7	17	3	11	11	25	9	13	43	21	7	11	26	14	20	2	12	23	0	20	305
sp|P59534|T2R39_HUMAN Taste receptor type 2 member 39 OS=Homo sapiens (Human) OX=9606 GN=TAS2R39 PE=2 SV=3	26	11	18	6	7	7	10	11	8	35	50	13	12	27	12	34	16	9	13	13	0	20	338
sp|Q8TC21|ZN596_HUMAN Zinc finger protein 596 OS=Homo sapiens (Human) OX=9606 GN=ZNF596 PE=2 SV=2	16	35	16	14	29	20	38	31	47	21	39	43	9	26	15	39	35	2	13	16	0	20	504
sp|Q9H426|RIMS4_HUMAN Regulating synaptic membrane exocytosis protein 4 OS=Homo sapiens (Human) OX=9606 GN=RIMS4 PE=1 SV=3	22	16	8	12	4	15	18	24	1	10	31	12	9	9	13	26	14	2	8	15	0	20	269
sp|Q9H9J4|UBP42_HUMAN Ubiquitin carboxyl-terminal hydrolase 42 OS=Homo sapiens (Human) OX=9606 GN=USP42 PE=1 SV=3	108	97	51	77	26	50	89	95	62	33	86	89	23	28	120	143	49	9	28	61	0	20	1324
sp|Q14157|UBP2L_HUMAN Ubiquitin-associated protein 2-like OS=Homo sapiens (Human) OX=9606 GN=UBAP2L PE=1 SV=2	78	39	55	40	2	85	40	97	26	24	68	36	16	29	90	173	110	8	28	43	0	20	1087
sp|Q06055|AT5G2_HUMAN ATP synthase F(0) complex subunit C2, mitochondrial OS=Homo sapiens (Human) OX=9606 GN=ATP5MC2 PE=1 SV=1	17	5	1	3	3	4	3	11	0	9	19	5	4	10	5	22	8	0	2	10	0	18	141
sp|Q06495|NPT2A_HUMAN Sodium-dependent phosphate transport protein 2A OS=Homo sapiens (Human) OX=9606 GN=SLC34A1 PE=1 SV=1	58	28	16	16	13	17	21	42	17	39	93	19	17	28	47	54	42	9	10	53	0	20	639
sp|Q9NSE2|CISH_HUMAN Cytokine-inducible SH2-containing protein OS=Homo sapiens (Human) OX=9606 GN=CISH PE=1 SV=1	23	20	3	14	6	11	14	8	5	5	32	7	5	8	32	21	15	3	7	19	0	20	258
sp|Q5BJF6|ODFP2_HUMAN Outer dense fiber protein 2 OS=Homo sapiens (Human) OX=9606 GN=ODF2 PE=1 SV=1	62	63	28	45	14	63	100	25	17	27	94	83	25	11	18	64	38	3	12	37	0	20	829
sp|Q56P42|PYDC2_HUMAN Pyrin domain-containing protein 2 OS=Homo sapiens (Human) OX=9606 GN=PYDC2 PE=1 SV=1	8	2	3	4	2	8	8	4	3	4	11	6	4	4	4	10	5	1	1	5	0	20	97
sp|P17927|CR1_HUMAN Complement receptor type 1 OS=Homo sapiens (Human) OX=9606 GN=CR1 PE=1 SV=3	76	102	105	93	122	70	98	178	57	104	133	77	23	91	200	182	106	34	53	135	0	20	2039
sp|Q92771|DDX12_HUMAN Putative ATP-dependent RNA helicase DDX12 OS=Homo sapiens (Human) OX=9606 GN=DDX12P PE=5 SV=3	83	67	26	31	24	68	81	63	23	34	107	55	21	37	44	70	28	4	19	65	0	20	950
sp|A0A0B4J241|TVAM1_HUMAN T cell receptor alpha variable 13-1 OS=Homo sapiens (Human) OX=9606 GN=TRAV13-1 PE=3 SV=1	8	3	5	6	2	7	7	5	3	8	9	7	1	5	4	11	7	2	4	8	0	20	112
sp|Q9Y5G6|PCDG7_HUMAN Protocadherin gamma-A7 OS=Homo sapiens (Human) OX=9606 GN=PCDHGA7 PE=2 SV=1	68	42	45	64	6	41	57	66	17	37	103	32	15	29	57	79	66	6	31	71	0	20	932
sp|O60258|FGF17_HUMAN Fibroblast growth factor 17 OS=Homo sapiens (Human) OX=9606 GN=FGF17 PE=1 SV=1	14	24	11	5	5	19	12	15	5	9	16	14	4	11	10	12	15	1	6	8	0	20	216
sp|Q7RTY3|PRS45_HUMAN Putative serine protease 45 OS=Homo sapiens (Human) OX=9606 GN=PRSS45P PE=5 SV=1	16	10	10	7	12	12	13	19	6	11	22	14	10	10	17	16	13	11	8	23	0	20	260
sp|Q9H4S2|GSX1_HUMAN GS homeobox 1 OS=Homo sapiens (Human) OX=9606 GN=GSX1 PE=2 SV=1	28	15	5	9	9	10	11	25	10	4	27	14	4	8	29	30	8	1	6	11	0	20	264
sp|P85037|FOXK1_HUMAN Forkhead box protein K1 OS=Homo sapiens (Human) OX=9606 GN=FOXK1 PE=1 SV=1	107	39	12	15	8	40	30	60	16	26	48	20	9	21	88	83	43	2	15	51	0	20	733
sp|Q00839|HNRPU_HUMAN Heterogeneous nuclear ribonucleoprotein U OS=Homo sapiens (Human) OX=9606 GN=HNRNPU PE=1 SV=6	61	45	42	40	13	48	88	112	13	20	46	70	19	31	42	40	27	6	27	35	0	20	825
sp|P07911|UROM_HUMAN Uromodulin OS=Homo sapiens (Human) OX=9606 GN=UMOD PE=1 SV=1	44	30	25	39	48	19	30	52	15	17	55	16	15	21	29	55	52	12	22	44	0	20	640
sp|Q9NR30|DDX21_HUMAN Nucleolar RNA helicase 2 OS=Homo sapiens (Human) OX=9606 GN=DDX21 PE=1 SV=5	50	43	23	34	9	44	75	62	16	46	47	91	12	29	38	60	40	5	12	47	0	20	783
sp|P59827|BPIB4_HUMAN BPI fold-containing family B member 4 OS=Homo sapiens (Human) OX=9606 GN=BPIFB4 PE=2 SV=2	38	25	25	35	6	17	28	75	7	34	99	21	15	13	36	32	33	3	15	57	0	20	614
sp|Q9BXY4|RSPO3_HUMAN R-spondin-3 OS=Homo sapiens (Human) OX=9606 GN=RSPO3 PE=1 SV=1	7	20	15	7	22	14	18	21	7	12	14	33	5	8	13	22	14	3	6	11	0	20	272
sp|P07988|PSPB_HUMAN Pulmonary surfactant-associated protein B OS=Homo sapiens (Human) OX=9606 GN=SFTPB PE=1 SV=3	27	16	6	20	25	32	19	22	10	13	58	11	12	7	33	20	16	8	4	22	0	20	381
sp|Q9H0K1|SIK2_HUMAN Serine/threonine-protein kinase SIK2 OS=Homo sapiens (Human) OX=9606 GN=SIK2 PE=1 SV=1	60	51	32	38	15	86	65	44	21	34	102	34	27	32	93	76	34	4	27	51	0	20	926
sp|A0A0B4J1U7|HV601_HUMAN Immunoglobulin heavy variable 6-1 OS=Homo sapiens (Human) OX=9606 GN=IGHV6-1 PE=3 SV=1	6	6	6	4	2	8	2	7	0	5	13	4	1	3	7	19	7	5	6	10	0	19	121
sp|Q9Y315|DEOC_HUMAN Deoxyribose-phosphate aldolase OS=Homo sapiens (Human) OX=9606 GN=DERA PE=1 SV=2	38	19	9	16	5	9	18	20	8	22	32	22	7	9	9	17	23	7	8	20	0	20	318
sp|Q8N2Q7|NLGN1_HUMAN Neuroligin-1 OS=Homo sapiens (Human) OX=9606 GN=NLGN1 PE=1 SV=3	53	39	43	60	16	37	36	58	29	41	75	40	18	34	65	49	62	13	32	63	0	20	863
sp|Q6ZRP0|PR23C_HUMAN Proline-rich protein 23C OS=Homo sapiens (Human) OX=9606 GN=PRR23C PE=2 SV=1	28	17	1	13	7	6	27	20	4	5	26	2	5	6	38	27	3	4	3	20	0	20	262
sp|Q9UGQ2|FLOWR_HUMAN Calcium channel flower homolog OS=Homo sapiens (Human) OX=9606 GN=CACFD1 PE=1 SV=1	23	6	5	3	7	8	10	15	1	12	19	5	5	7	6	13	8	5	4	10	0	20	172
sp|Q14CZ0|CP072_HUMAN UPF0472 protein C16orf72 OS=Homo sapiens (Human) OX=9606 GN=C16orf72 PE=1 SV=1	24	24	11	12	4	18	23	14	10	11	20	12	4	7	16	25	17	5	3	15	0	20	275
sp|Q9H4F1|SIA7D_HUMAN Alpha-N-acetyl-neuraminyl-2,3-beta-galactosyl-1,3-N-acetyl-galactosaminide alpha-2,6-sialyltransferase OS=Homo sapiens (Human) OX=9606 GN=ST6GALNAC4 PE=2 SV=2	18	24	3	10	12	12	15	22	11	9	29	9	11	14	17	26	17	5	14	24	0	20	302
sp|O95486|SC24A_HUMAN Protein transport protein Sec24A OS=Homo sapiens (Human) OX=9606 GN=SEC24A PE=1 SV=2	63	46	64	37	14	71	39	63	22	36	133	31	27	41	110	113	69	4	39	71	0	20	1093
sp|Q96IV0|NGLY1_HUMAN Peptide-N(4)-(N-acetyl-beta-glucosaminyl)asparagine amidase OS=Homo sapiens (Human) OX=9606 GN=NGLY1 PE=1 SV=1	41	43	30	32	20	30	56	35	15	32	64	41	5	24	22	61	31	16	16	40	0	20	654
sp|O75691|UTP20_HUMAN Small subunit processome component 20 homolog OS=Homo sapiens (Human) OX=9606 GN=UTP20 PE=1 SV=3	162	112	94	122	46	125	233	101	77	178	395	238	69	125	114	178	149	22	72	173	0	20	2785
sp|Q9NXI6|RN186_HUMAN E3 ubiquitin-protein ligase RNF186 OS=Homo sapiens (Human) OX=9606 GN=RNF186 PE=1 SV=1	24	10	2	7	18	10	8	14	8	12	34	5	2	5	15	18	16	3	2	14	0	20	227
sp|P10515|ODP2_HUMAN Dihydrolipoyllysine-residue acetyltransferase component of pyruvate dehydrogenase complex, mitochondrial OS=Homo sapiens (Human) OX=9606 GN=DLAT PE=1 SV=3	68	29	17	27	9	21	37	47	7	40	49	37	14	15	69	40	47	8	11	55	0	20	647
sp|O60858|TRI13_HUMAN E3 ubiquitin-protein ligase TRIM13 OS=Homo sapiens (Human) OX=9606 GN=TRIM13 PE=1 SV=2	16	13	17	23	15	18	30	14	5	24	50	35	9	31	19	28	24	7	8	21	0	20	407
sp|Q92889|XPF_HUMAN DNA repair endonuclease XPF OS=Homo sapiens (Human) OX=9606 GN=ERCC4 PE=1 SV=3	59	62	29	42	16	32	91	42	23	51	112	65	16	35	42	65	49	6	27	52	0	20	916
sp|O14609|XKRY_HUMAN Testis-specific XK-related protein, Y-linked OS=Homo sapiens (Human) OX=9606 GN=XKRY PE=2 SV=1	11	3	6	7	5	5	3	4	6	20	21	6	3	12	6	16	8	5	4	8	0	20	159
sp|P51812|KS6A3_HUMAN Ribosomal protein S6 kinase alpha-3 OS=Homo sapiens (Human) OX=9606 GN=RPS6KA3 PE=1 SV=1	49	37	21	44	6	31	53	48	24	41	74	53	21	35	38	45	41	8	24	47	0	20	740
sp|Q01469|FABP5_HUMAN Fatty acid-binding protein 5 OS=Homo sapiens (Human) OX=9606 GN=FABP5 PE=1 SV=3	6	6	4	8	6	6	12	11	1	6	10	14	5	4	1	4	17	2	2	10	0	20	135
sp|P15884|ITF2_HUMAN Transcription factor 4 OS=Homo sapiens (Human) OX=9606 GN=TCF4 PE=1 SV=3	38	36	36	40	4	29	28	65	30	15	51	25	22	10	58	107	29	3	18	23	0	20	667
sp|Q5VXU9|SHOC1_HUMAN Protein shortage in chiasmata 1 ortholog OS=Homo sapiens (Human) OX=9606 GN=SHOC1 PE=1 SV=1	51	44	73	76	37	74	130	44	34	94	176	102	22	69	65	146	82	17	39	69	0	20	1444
sp|Q17RM4|CC142_HUMAN Coiled-coil domain-containing protein 142 OS=Homo sapiens (Human) OX=9606 GN=CCDC142 PE=2 SV=1	73	51	3	19	22	69	45	66	15	14	134	10	6	14	67	58	28	20	10	26	0	20	750
sp|A0A0B4J1X5|HV374_HUMAN Immunoglobulin heavy variable 3-74 OS=Homo sapiens (Human) OX=9606 GN=IGHV3-74 PE=3 SV=1	9	7	4	4	3	5	4	12	1	3	11	4	3	5	2	15	5	4	5	11	0	20	117
sp|Q9UIW0|VAX2_HUMAN Ventral anterior homeobox 2 OS=Homo sapiens (Human) OX=9606 GN=VAX2 PE=1 SV=1	28	31	6	15	5	10	18	31	3	4	31	11	2	6	24	36	13	2	4	10	0	20	290
sp|O94979|SC31A_HUMAN Protein transport protein Sec31A OS=Homo sapiens (Human) OX=9606 GN=SEC31A PE=1 SV=3	103	40	53	57	17	90	57	81	32	61	110	65	27	38	108	109	67	16	28	61	0	20	1220
sp|P48751|B3A3_HUMAN Anion exchange protein 3 OS=Homo sapiens (Human) OX=9606 GN=SLC4A3 PE=2 SV=2	89	82	16	60	8	34	94	91	39	47	160	50	23	54	112	96	61	13	19	84	0	20	1232
sp|Q8N7E2|CBLL2_HUMAN E3 ubiquitin-protein ligase CBLL2 OS=Homo sapiens (Human) OX=9606 GN=CBLL2 PE=1 SV=1	18	27	16	18	12	30	16	14	26	26	23	31	8	8	53	37	18	4	19	21	0	20	425
sp|Q86T24|KAISO_HUMAN Transcriptional regulator Kaiso OS=Homo sapiens (Human) OX=9606 GN=ZBTB33 PE=1 SV=2	29	22	36	47	11	34	44	32	16	56	53	39	11	18	40	75	48	2	21	38	0	20	672
sp|Q9UJC3|HOOK1_HUMAN Protein Hook homolog 1 OS=Homo sapiens (Human) OX=9606 GN=HOOK1 PE=1 SV=2	47	39	33	36	11	65	101	16	16	32	90	62	23	12	17	44	33	5	13	33	0	20	728
sp|A6NC57|ANR62_HUMAN Ankyrin repeat domain-containing protein 62 OS=Homo sapiens (Human) OX=9606 GN=ANKRD62 PE=2 SV=4	52	61	58	57	23	67	100	28	21	42	97	87	27	16	9	66	41	4	21	40	0	20	917
sp|O94788|AL1A2_HUMAN Retinal dehydrogenase 2 OS=Homo sapiens (Human) OX=9606 GN=ALDH1A2 PE=1 SV=3	49	24	23	23	8	21	37	47	5	36	36	31	13	28	27	28	26	6	13	37	0	20	518
sp|Q9Y3E0|GOT1B_HUMAN Vesicle transport protein GOT1B OS=Homo sapiens (Human) OX=9606 GN=GOLT1B PE=1 SV=1	5	6	4	3	0	2	3	19	1	11	18	6	6	24	4	4	5	1	1	15	0	19	138
sp|O00165|HAX1_HUMAN HCLS1-associated protein X-1 OS=Homo sapiens (Human) OX=9606 GN=HAX1 PE=1 SV=2	6	26	4	28	0	9	24	28	9	7	16	5	5	24	32	27	12	5	2	10	0	19	279
sp|Q70EK9|UBP51_HUMAN Ubiquitin carboxyl-terminal hydrolase 51 OS=Homo sapiens (Human) OX=9606 GN=USP51 PE=1 SV=1	36	44	17	34	31	32	44	46	31	34	57	49	13	26	56	68	40	10	15	28	0	20	711
sp|Q16553|LY6E_HUMAN Lymphocyte antigen 6E OS=Homo sapiens (Human) OX=9606 GN=LY6E PE=2 SV=1	12	3	6	3	10	3	2	12	1	5	22	4	3	6	7	16	5	0	2	9	0	19	131
sp|O75880|SCO1_HUMAN Protein SCO1 homolog, mitochondrial OS=Homo sapiens (Human) OX=9606 GN=SCO1 PE=1 SV=1	20	22	2	16	4	9	21	28	6	16	28	21	7	11	26	14	18	6	11	15	0	20	301
sp|Q9C0C9|UBE2O_HUMAN (E3-independent) E2 ubiquitin-conjugating enzyme OS=Homo sapiens (Human) OX=9606 GN=UBE2O PE=1 SV=3	92	59	32	88	25	49	114	95	25	52	86	87	22	40	102	123	57	16	27	101	0	20	1292
sp|Q5XKR4|OTP_HUMAN Homeobox protein orthopedia OS=Homo sapiens (Human) OX=9606 GN=OTP PE=1 SV=1	40	19	10	14	4	21	10	31	8	4	33	13	9	9	32	33	16	4	2	13	0	20	325
sp|P0C025|NUD17_HUMAN Nucleoside diphosphate-linked moiety X motif 17 OS=Homo sapiens (Human) OX=9606 GN=NUDT17 PE=1 SV=2	26	23	5	11	4	14	24	26	7	6	51	9	6	6	37	24	13	9	4	23	0	20	328
sp|P56278|MTCP1_HUMAN Protein p13 MTCP-1 OS=Homo sapiens (Human) OX=9606 GN=MTCP1 PE=1 SV=1	6	8	2	7	0	10	9	5	5	3	15	1	4	1	7	4	3	4	4	9	0	19	107
sp|Q8NGX1|O2T34_HUMAN Olfactory receptor 2T34 OS=Homo sapiens (Human) OX=9606 GN=OR2T34 PE=2 SV=1	24	13	8	9	12	12	6	12	9	16	53	8	22	17	12	28	25	1	14	17	0	20	318
sp|Q9H040|SPRTN_HUMAN SprT-like domain-containing protein Spartan OS=Homo sapiens (Human) OX=9606 GN=SPRTN PE=1 SV=2	24	24	34	23	10	22	35	27	17	18	37	38	8	16	25	56	20	9	13	33	0	20	489
sp|Q9GZV8|PRD14_HUMAN PR domain zinc finger protein 14 OS=Homo sapiens (Human) OX=9606 GN=PRDM14 PE=1 SV=1	28	26	11	28	25	25	37	40	29	17	43	34	8	30	55	59	18	5	25	28	0	20	571
sp|Q8NH02|O2T29_HUMAN Olfactory receptor 2T29 OS=Homo sapiens (Human) OX=9606 GN=OR2T29 PE=3 SV=2	20	11	8	9	11	4	7	12	12	18	47	10	22	20	14	26	19	2	15	28	0	20	315
sp|Q9C099|LRCC1_HUMAN Leucine-rich repeat and coiled-coil domain-containing protein 1 OS=Homo sapiens (Human) OX=9606 GN=LRRCC1 PE=1 SV=2	59	50	56	65	21	72	124	21	35	71	129	105	19	17	19	66	43	5	14	41	0	20	1032
sp|P06744|G6PI_HUMAN Glucose-6-phosphate isomerase OS=Homo sapiens (Human) OX=9606 GN=GPI PE=1 SV=4	40	27	28	27	4	29	32	41	21	32	53	35	15	28	22	29	37	12	14	32	0	20	558
sp|A6NI79|CCD69_HUMAN Coiled-coil domain-containing protein 69 OS=Homo sapiens (Human) OX=9606 GN=CCDC69 PE=1 SV=1	16	25	8	9	3	27	47	6	9	11	37	21	4	6	14	19	14	2	4	14	0	20	296
sp|Q13946|PDE7A_HUMAN High affinity cAMP-specific 3',5'-cyclic phosphodiesterase 7A OS=Homo sapiens (Human) OX=9606 GN=PDE7A PE=1 SV=2	27	37	23	25	9	25	27	22	23	22	62	14	11	24	17	48	21	7	15	23	0	20	482
sp|Q9UL12|SARDH_HUMAN Sarcosine dehydrogenase, mitochondrial OS=Homo sapiens (Human) OX=9606 GN=SARDH PE=1 SV=1	88	64	21	46	17	29	53	91	40	31	84	30	23	33	52	58	43	16	33	66	0	20	918
sp|Q9H2S9|IKZF4_HUMAN Zinc finger protein Eos OS=Homo sapiens (Human) OX=9606 GN=IKZF4 PE=1 SV=2	21	39	17	30	21	21	43	56	27	15	51	26	11	20	56	62	22	0	14	33	0	19	585
sp|Q9NY56|OBP2A_HUMAN Odorant-binding protein 2a OS=Homo sapiens (Human) OX=9606 GN=OBP2A PE=1 SV=1	8	11	4	9	3	5	15	16	2	5	20	15	6	9	7	5	12	1	6	11	0	20	170
sp|Q9UGP8|SEC63_HUMAN Translocation protein SEC63 homolog OS=Homo sapiens (Human) OX=9606 GN=SEC63 PE=1 SV=2	41	35	29	49	7	49	76	33	10	38	74	67	19	24	40	44	36	13	31	45	0	20	760
sp|Q96C10|DHX58_HUMAN Probable ATP-dependent RNA helicase DHX58 OS=Homo sapiens (Human) OX=9606 GN=DHX58 PE=1 SV=1	55	43	26	32	16	56	43	36	28	27	82	30	18	17	24	35	33	8	15	54	0	20	678
sp|P49763|PLGF_HUMAN Placenta growth factor OS=Homo sapiens (Human) OX=9606 GN=PGF PE=1 SV=2	12	21	4	7	11	10	16	14	5	2	20	6	9	8	25	20	5	4	3	19	0	20	221
sp|Q9NW82|WDR70_HUMAN WD repeat-containing protein 70 OS=Homo sapiens (Human) OX=9606 GN=WDR70 PE=1 SV=1	37	39	21	45	13	26	55	45	15	27	38	51	18	23	41	56	45	8	14	37	0	20	654
sp|Q9GZN6|S6A16_HUMAN Orphan sodium- and chloride-dependent neurotransmitter transporter NTT5 OS=Homo sapiens (Human) OX=9606 GN=SLC6A16 PE=2 SV=1	46	21	20	14	18	26	29	44	9	50	89	30	26	52	45	72	43	22	22	58	0	20	736
sp|Q99932|SPAG8_HUMAN Sperm-associated antigen 8 OS=Homo sapiens (Human) OX=9606 GN=SPAG8 PE=1 SV=3	36	21	11	16	12	22	31	56	14	9	36	14	10	15	61	57	30	7	11	16	0	20	485
sp|P32248|CCR7_HUMAN C-C chemokine receptor type 7 OS=Homo sapiens (Human) OX=9606 GN=CCR7 PE=1 SV=2	26	17	12	14	15	14	11	12	5	30	51	17	10	26	8	30	21	5	15	39	0	20	378
sp|Q96HA8|NTAQ1_HUMAN Protein N-terminal glutamine amidohydrolase OS=Homo sapiens (Human) OX=9606 GN=WDYHV1 PE=1 SV=2	10	10	10	17	8	6	11	11	7	11	10	11	5	11	17	16	5	5	12	12	0	20	205
sp|Q9NZM6|PK2L2_HUMAN Polycystic kidney disease 2-like 2 protein OS=Homo sapiens (Human) OX=9606 GN=PKD2L2 PE=2 SV=2	27	26	38	21	9	26	37	28	7	49	68	45	12	59	9	47	31	14	38	33	0	20	624
sp|Q15834|CC85B_HUMAN Coiled-coil domain-containing protein 85B OS=Homo sapiens (Human) OX=9606 GN=CCDC85B PE=1 SV=2	21	24	4	9	6	13	26	25	1	1	32	4	3	2	10	10	3	3	0	5	0	19	202
sp|Q13342|SP140_HUMAN Nuclear body protein SP140 OS=Homo sapiens (Human) OX=9606 GN=SP140 PE=1 SV=2	43	59	42	42	37	47	102	63	13	26	64	56	25	34	49	72	26	8	20	39	0	20	867
sp|Q9H221|ABCG8_HUMAN ATP-binding cassette sub-family G member 8 OS=Homo sapiens (Human) OX=9606 GN=ABCG8 PE=1 SV=1	46	40	21	31	14	33	26	46	11	40	90	23	21	36	33	54	35	11	26	36	0	20	673
sp|P58753|TIRAP_HUMAN Toll/interleukin-1 receptor domain-containing adapter protein OS=Homo sapiens (Human) OX=9606 GN=TIRAP PE=1 SV=2	17	12	1	12	7	11	9	14	3	3	26	10	5	5	22	32	12	3	7	10	0	20	221
sp|Q8IVF1|NTM2A_HUMAN NUT family member 2A OS=Homo sapiens (Human) OX=9606 GN=NUTM2A PE=2 SV=4	75	49	13	22	22	55	59	79	18	7	93	41	17	23	121	73	43	13	7	48	0	20	878
sp|Q96FF9|CDCA5_HUMAN Sororin OS=Homo sapiens (Human) OX=9606 GN=CDCA5 PE=1 SV=1	22	22	3	7	3	5	25	14	2	7	20	20	5	7	29	28	14	3	1	15	0	20	252
sp|Q15646|OASL_HUMAN 2'-5'-oligoadenylate synthase-like protein OS=Homo sapiens (Human) OX=9606 GN=OASL PE=1 SV=2	27	33	16	25	9	35	36	28	11	28	60	30	7	20	29	31	23	10	21	35	0	20	514
sp|A8MW95|BECN2_HUMAN Beclin-2 OS=Homo sapiens (Human) OX=9606 GN=BECN2 PE=1 SV=2	41	28	17	25	10	32	39	30	7	16	56	13	7	13	13	26	22	6	11	19	0	20	431
sp|Q13156|RFA4_HUMAN Replication protein A 30 kDa subunit OS=Homo sapiens (Human) OX=9606 GN=RPA4 PE=1 SV=2	16	13	8	18	6	10	18	16	10	19	16	18	5	8	11	21	13	1	5	29	0	20	261
sp|P35240|MERL_HUMAN Merlin OS=Homo sapiens (Human) OX=9606 GN=NF2 PE=1 SV=1	52	41	18	30	4	30	77	15	10	29	65	60	24	23	21	26	27	6	15	22	0	20	595
sp|Q96QS6|KPSH2_HUMAN Serine/threonine-protein kinase H2 OS=Homo sapiens (Human) OX=9606 GN=PSKH2 PE=1 SV=1	37	29	7	14	3	17	23	29	12	21	37	23	13	11	19	31	17	6	14	22	0	20	385
sp|Q9NZJ6|COQ3_HUMAN Ubiquinone biosynthesis O-methyltransferase, mitochondrial OS=Homo sapiens (Human) OX=9606 GN=COQ3 PE=1 SV=3	22	14	15	11	9	13	26	28	9	20	37	23	4	15	18	30	24	9	12	30	0	20	369
sp|Q15669|RHOH_HUMAN Rho-related GTP-binding protein RhoH OS=Homo sapiens (Human) OX=9606 GN=RHOH PE=1 SV=1	15	15	12	8	7	9	9	11	2	8	16	9	5	8	6	15	10	2	5	19	0	20	191
sp|Q96NA8|TSNA1_HUMAN t-SNARE domain-containing protein 1 OS=Homo sapiens (Human) OX=9606 GN=TSNARE1 PE=1 SV=2	49	41	11	20	13	36	35	38	10	21	50	28	9	11	35	47	22	4	5	28	0	20	513
sp|Q9NZ38|IDAS1_HUMAN Uncharacterized protein IDI2-AS1 OS=Homo sapiens (Human) OX=9606 GN=IDI2-AS1 PE=2 SV=1	13	17	8	5	5	4	10	11	3	5	20	17	7	12	12	18	9	1	4	7	0	20	188
sp|Q15048|LRC14_HUMAN Leucine-rich repeat-containing protein 14 OS=Homo sapiens (Human) OX=9606 GN=LRRC14 PE=1 SV=1	49	37	8	23	15	28	26	26	15	8	94	8	10	18	30	35	23	4	8	28	0	20	493
sp|Q6UXS0|CL19A_HUMAN C-type lectin domain family 19 member A OS=Homo sapiens (Human) OX=9606 GN=CLEC19A PE=2 SV=1	11	5	3	6	4	6	6	6	5	6	16	5	2	8	11	14	5	7	3	7	0	20	136
sp|Q9NZ72|STMN3_HUMAN Stathmin-3 OS=Homo sapiens (Human) OX=9606 GN=STMN3 PE=1 SV=3	14	15	6	4	2	10	29	3	5	4	20	18	6	3	7	17	5	0	5	7	0	19	180
sp|Q7L2Z9|CENPQ_HUMAN Centromere protein Q OS=Homo sapiens (Human) OX=9606 GN=CENPQ PE=1 SV=1	14	9	20	9	1	17	27	6	7	13	34	37	11	2	7	24	16	1	2	11	0	20	268
sp|Q9H0W5|CCDC8_HUMAN Coiled-coil domain-containing protein 8 OS=Homo sapiens (Human) OX=9606 GN=CCDC8 PE=1 SV=2	77	67	16	31	2	40	55	42	5	8	24	22	5	12	40	29	20	8	4	31	0	20	538
sp|Q5MJ07|SPXN5_HUMAN Sperm protein associated with the nucleus on the X chromosome N5 OS=Homo sapiens (Human) OX=9606 GN=SPANXN5 PE=3 SV=1	0	3	6	4	2	3	7	1	1	1	6	10	3	0	4	10	6	0	2	3	0	17	72
sp|Q8IUL8|CILP2_HUMAN Cartilage intermediate layer protein 2 OS=Homo sapiens (Human) OX=9606 GN=CILP2 PE=2 SV=2	116	118	25	59	40	36	70	104	23	22	98	26	14	41	110	72	53	17	27	85	0	20	1156
sp|P52565|GDIR1_HUMAN Rho GDP-dissociation inhibitor 1 OS=Homo sapiens (Human) OX=9606 GN=ARHGDIA PE=1 SV=3	13	9	6	15	1	8	22	11	3	10	16	19	4	5	10	15	10	3	9	15	0	20	204
sp|Q8IVM7|CM029_HUMAN Putative uncharacterized protein encoded by LINC00346 OS=Homo sapiens (Human) OX=9606 GN=LINC00346 PE=5 SV=1	10	22	1	7	6	6	14	20	5	5	11	5	3	7	9	10	12	0	1	10	0	19	164
sp|Q92637|FCGRB_HUMAN High affinity immunoglobulin gamma Fc receptor IB OS=Homo sapiens (Human) OX=9606 GN=FCGR1B PE=2 SV=1	9	13	10	7	5	16	19	18	12	11	33	18	4	10	10	22	22	10	9	22	0	20	280
sp|A6NEY8|PRXD1_HUMAN Putative prolyl-tRNA synthetase associated domain-containing protein 1 OS=Homo sapiens (Human) OX=9606 GN=PRORSD1P PE=5 SV=3	15	3	7	9	2	5	13	15	9	5	22	13	7	10	6	4	9	1	2	12	0	20	169
sp|Q8N138|ORML3_HUMAN ORM1-like protein 3 OS=Homo sapiens (Human) OX=9606 GN=ORMDL3 PE=1 SV=1	4	5	8	3	0	5	3	9	7	12	19	6	6	9	8	9	14	3	7	16	0	19	153
sp|Q9Y275|TN13B_HUMAN Tumor necrosis factor ligand superfamily member 13B OS=Homo sapiens (Human) OX=9606 GN=TNFSF13B PE=1 SV=1	25	12	8	11	7	14	25	20	4	11	38	21	4	10	14	22	16	1	7	15	0	20	285
sp|A6NHC0|CAN8_HUMAN Calpain-8 OS=Homo sapiens (Human) OX=9606 GN=CAPN8 PE=2 SV=3	51	35	27	40	18	36	56	55	12	31	76	37	8	36	29	47	33	17	22	37	0	20	703
sp|Q8WV16|DCAF4_HUMAN DDB1- and CUL4-associated factor 4 OS=Homo sapiens (Human) OX=9606 GN=DCAF4 PE=1 SV=3	33	41	25	25	14	19	20	34	17	18	56	22	13	19	22	50	22	8	14	23	0	20	495
sp|Q92804|RBP56_HUMAN TATA-binding protein-associated factor 2N OS=Homo sapiens (Human) OX=9606 GN=TAF15 PE=1 SV=1	9	56	26	55	4	42	15	175	7	8	2	16	7	13	18	62	14	2	54	7	0	20	592
sp|Q5SWH9|TMM69_HUMAN Transmembrane protein 69 OS=Homo sapiens (Human) OX=9606 GN=TMEM69 PE=2 SV=1	20	9	3	3	4	10	5	11	4	14	32	15	8	21	21	28	15	4	8	12	0	20	247
sp|Q9GZY8|MFF_HUMAN Mitochondrial fission factor OS=Homo sapiens (Human) OX=9606 GN=MFF PE=1 SV=1	27	35	17	17	1	17	25	14	4	18	31	10	9	8	26	33	18	4	6	22	0	20	342
sp|A6NK06|IRG1_HUMAN Cis-aconitate decarboxylase OS=Homo sapiens (Human) OX=9606 GN=ACOD1 PE=1 SV=1	52	20	19	22	6	14	23	26	18	24	53	24	9	22	30	42	27	6	12	32	0	20	481
sp|Q8NDW4|ZN248_HUMAN Zinc finger protein 248 OS=Homo sapiens (Human) OX=9606 GN=ZNF248 PE=1 SV=1	15	26	34	20	32	29	52	36	29	26	35	59	5	28	20	42	39	6	24	22	0	20	579
sp|Q96EY5|MB12A_HUMAN Multivesicular body subunit 12A OS=Homo sapiens (Human) OX=9606 GN=MVB12A PE=1 SV=1	28	14	4	15	6	5	10	24	1	9	26	18	6	12	24	35	11	2	6	17	0	20	273
sp|Q9GZW8|MS4A7_HUMAN Membrane-spanning 4-domains subfamily A member 7 OS=Homo sapiens (Human) OX=9606 GN=MS4A7 PE=2 SV=1	12	3	6	6	5	13	7	16	5	14	32	8	7	10	12	37	18	3	12	14	0	20	240
sp|P53701|CCHL_HUMAN Cytochrome c-type heme lyase OS=Homo sapiens (Human) OX=9606 GN=HCCS PE=1 SV=1	23	15	13	14	7	9	21	14	5	13	12	18	9	5	24	21	9	12	11	13	0	20	268
sp|Q3ZCV2|LEXM_HUMAN Lymphocyte expansion molecule OS=Homo sapiens (Human) OX=9606 GN=LEXM PE=2 SV=4	18	28	18	12	7	17	22	36	11	6	31	37	12	19	33	38	30	9	20	14	0	20	418
sp|Q9NY27|PP4R2_HUMAN Serine/threonine-protein phosphatase 4 regulatory subunit 2 OS=Homo sapiens (Human) OX=9606 GN=PPP4R2 PE=1 SV=3	12	21	26	27	7	14	65	20	6	11	22	26	14	13	23	51	27	1	5	26	0	20	417
sp|Q8WZB0|CI130_HUMAN Putative uncharacterized protein encoded by LINC00476 OS=Homo sapiens (Human) OX=9606 GN=LINC00476 PE=5 SV=1	12	24	6	4	3	4	5	16	0	6	11	3	1	3	11	13	7	1	0	6	0	18	136
sp|Q9NVA2|SEP11_HUMAN Septin-11 OS=Homo sapiens (Human) OX=9606 GN=SEPTIN11 PE=1 SV=3	25	18	21	23	5	23	47	18	12	19	38	48	12	20	12	25	23	1	11	28	0	20	429
sp|Q15828|CYTM_HUMAN Cystatin-M OS=Homo sapiens (Human) OX=9606 GN=CST6 PE=1 SV=1	17	10	5	9	5	11	5	7	3	4	18	6	6	4	7	9	7	1	4	11	0	20	149
sp|Q8NFT8|DNER_HUMAN Delta and Notch-like epidermal growth factor-related receptor OS=Homo sapiens (Human) OX=9606 GN=DNER PE=1 SV=1	60	23	36	33	65	30	41	62	17	34	59	24	8	17	56	66	40	6	24	36	0	20	737
sp|Q8TE49|OTU7A_HUMAN OTU domain-containing protein 7A OS=Homo sapiens (Human) OX=9606 GN=OTUD7A PE=1 SV=1	115	77	32	44	16	37	69	75	24	19	80	45	15	22	62	77	44	13	18	42	0	20	926
sp|O75648|MTU1_HUMAN Mitochondrial tRNA-specific 2-thiouridylase 1 OS=Homo sapiens (Human) OX=9606 GN=TRMU PE=1 SV=2	33	28	13	26	10	19	24	30	16	13	41	25	8	25	18	20	18	6	13	35	0	20	421
sp|Q9UJD0|RIMS3_HUMAN Regulating synaptic membrane exocytosis protein 3 OS=Homo sapiens (Human) OX=9606 GN=RIMS3 PE=1 SV=1	23	18	6	13	5	16	14	32	2	13	27	18	10	8	15	38	26	3	5	16	0	20	308
sp|Q15697|ZN174_HUMAN Zinc finger protein 174 OS=Homo sapiens (Human) OX=9606 GN=ZNF174 PE=1 SV=1	21	35	12	9	15	35	33	25	20	9	37	33	7	9	33	36	15	4	7	12	0	20	407
sp|Q9NP66|HM20A_HUMAN High mobility group protein 20A OS=Homo sapiens (Human) OX=9606 GN=HMG20A PE=1 SV=1	20	32	19	18	0	20	42	13	9	8	28	23	9	11	18	30	21	2	7	17	0	19	347
sp|Q8TDN6|BRX1_HUMAN Ribosome biogenesis protein BRX1 homolog OS=Homo sapiens (Human) OX=9606 GN=BRIX1 PE=1 SV=2	21	28	14	17	5	15	25	13	11	22	27	43	11	18	25	14	15	4	8	17	0	20	353
sp|P01705|LV223_HUMAN Immunoglobulin lambda variable 2-23 OS=Homo sapiens (Human) OX=9606 GN=IGLV2-23 PE=1 SV=2	10	2	3	4	3	7	3	11	1	4	11	4	2	1	5	20	9	3	6	4	0	20	113
sp|Q9NZ42|PEN2_HUMAN Gamma-secretase subunit PEN-2 OS=Homo sapiens (Human) OX=9606 GN=PSENEN PE=1 SV=1	5	6	4	1	1	3	5	7	0	7	13	3	1	11	5	5	5	6	6	7	0	19	101
sp|O00567|NOP56_HUMAN Nucleolar protein 56 OS=Homo sapiens (Human) OX=9606 GN=NOP56 PE=1 SV=4	50	31	22	19	7	19	60	33	14	30	61	65	12	20	21	61	20	1	12	36	0	20	594
tr|A0A0C4DH90|A0A0C4DH90_HUMAN Ig-like domain-containing protein OS=Homo sapiens (Human) OX=9606 GN=IGKV3OR2-268 PE=4 SV=5	10	5	1	4	2	9	4	8	0	4	16	1	2	4	9	16	10	2	6	3	0	19	116
sp|Q86Y97|KMT5C_HUMAN Histone-lysine N-methyltransferase KMT5C OS=Homo sapiens (Human) OX=9606 GN=KMT5C PE=1 SV=1	44	56	9	19	16	18	26	33	14	9	52	17	4	15	48	20	20	9	11	22	0	20	462
sp|A0A1W2PR82|PERC1_HUMAN Protein PERCC1 OS=Homo sapiens (Human) OX=9606 GN=PERCC1 PE=3 SV=1	23	21	0	16	5	9	35	27	4	5	30	5	2	7	33	18	11	4	7	5	0	19	267
sp|Q9NWA0|MED9_HUMAN Mediator of RNA polymerase II transcription subunit 9 OS=Homo sapiens (Human) OX=9606 GN=MED9 PE=1 SV=1	10	7	4	6	2	17	11	3	3	5	14	10	5	3	23	11	4	0	2	6	0	19	146
sp|O15264|MK13_HUMAN Mitogen-activated protein kinase 13 OS=Homo sapiens (Human) OX=9606 GN=MAPK13 PE=1 SV=1	24	18	8	22	3	19	25	18	10	17	38	32	13	18	17	21	19	5	15	23	0	20	365
sp|P04196|HRG_HUMAN Histidine-rich glycoprotein OS=Homo sapiens (Human) OX=9606 GN=HRG PE=1 SV=1	22	33	20	31	17	18	28	35	66	13	34	22	3	26	65	36	17	2	11	26	0	20	525
sp|Q9Y2B4|T53G5_HUMAN TP53-target gene 5 protein OS=Homo sapiens (Human) OX=9606 GN=TP53TG5 PE=1 SV=1	10	33	13	8	6	12	21	13	7	10	24	33	9	4	18	28	13	9	4	15	0	20	290
sp|Q52LW3|RHG29_HUMAN Rho GTPase-activating protein 29 OS=Homo sapiens (Human) OX=9606 GN=ARHGAP29 PE=1 SV=2	72	61	71	63	27	60	114	51	27	62	134	106	27	51	64	122	62	7	17	63	0	20	1261
sp|Q92583|CCL17_HUMAN C-C motif chemokine 17 OS=Homo sapiens (Human) OX=9606 GN=CCL17 PE=1 SV=1	9	7	4	3	4	4	4	5	2	4	12	7	2	2	3	6	5	1	3	7	0	20	94
sp|Q9BR11|ZSWM1_HUMAN Zinc finger SWIM domain-containing protein 1 OS=Homo sapiens (Human) OX=9606 GN=ZSWIM1 PE=2 SV=2	39	21	16	15	13	33	28	18	21	21	66	21	13	24	30	37	28	9	12	20	0	20	485
sp|Q8NCT1|ARRD4_HUMAN Arrestin domain-containing protein 4 OS=Homo sapiens (Human) OX=9606 GN=ARRDC4 PE=1 SV=3	35	20	11	10	13	15	33	29	8	23	35	17	6	16	38	36	21	4	13	35	0	20	418
sp|Q8NHV5|MOSMO_HUMAN Modulator of smoothened protein OS=Homo sapiens (Human) OX=9606 GN=MOSMO PE=2 SV=3	14	7	5	4	6	3	4	15	2	19	18	4	4	12	9	8	13	4	4	12	0	20	167
sp|Q16401|PSMD5_HUMAN 26S proteasome non-ATPase regulatory subunit 5 OS=Homo sapiens (Human) OX=9606 GN=PSMD5 PE=1 SV=3	39	28	20	21	7	24	41	24	9	31	68	21	10	17	22	40	24	2	15	41	0	20	504
sp|Q9HD87|CF050_HUMAN Putative uncharacterized protein C6orf50 OS=Homo sapiens (Human) OX=9606 GN=C6orf50 PE=5 SV=1	5	4	3	5	4	4	6	1	3	9	15	9	5	6	1	5	6	3	6	2	0	20	102
sp|P36575|ARRC_HUMAN Arrestin-C OS=Homo sapiens (Human) OX=9606 GN=ARR3 PE=1 SV=2	22	16	11	23	8	16	28	24	7	20	39	27	6	15	22	31	22	1	10	40	0	20	388
sp|Q8NFQ5|BPIB6_HUMAN BPI fold-containing family B member 6 OS=Homo sapiens (Human) OX=9606 GN=BPIFB6 PE=1 SV=1	32	12	21	16	5	19	22	27	7	23	65	33	22	16	27	29	31	2	9	35	0	20	453
sp|Q0VDD5|CQ091_HUMAN Putative uncharacterized protein encoded by MIR22HG OS=Homo sapiens (Human) OX=9606 GN=MIR22HG PE=5 SV=1	7	8	1	3	1	2	2	5	0	1	5	2	1	4	4	4	2	3	0	2	0	18	57
sp|P0CG29|GST2_HUMAN Glutathione S-transferase theta-2 OS=Homo sapiens (Human) OX=9606 GN=GSTT2 PE=1 SV=1	22	14	3	11	3	15	17	16	5	14	37	13	5	9	15	11	9	5	7	13	0	20	244
sp|P78369|CLD10_HUMAN Claudin-10 OS=Homo sapiens (Human) OX=9606 GN=CLDN10 PE=1 SV=2	22	3	8	10	9	3	5	21	1	17	16	15	7	15	5	23	20	5	9	14	0	20	228
sp|Q96AC1|FERM2_HUMAN Fermitin family homolog 2 OS=Homo sapiens (Human) OX=9606 GN=FERMT2 PE=1 SV=1	41	23	28	42	11	28	50	33	15	45	70	63	22	24	28	47	39	17	22	32	0	20	680
sp|Q8NGC2|OR4E2_HUMAN Olfactory receptor 4E2 OS=Homo sapiens (Human) OX=9606 GN=OR4E2 PE=3 SV=1	15	12	11	10	11	8	8	11	7	26	41	9	11	27	12	24	28	1	13	28	0	20	313
sp|Q16540|RM23_HUMAN 39S ribosomal protein L23, mitochondrial OS=Homo sapiens (Human) OX=9606 GN=MRPL23 PE=1 SV=1	8	18	6	9	0	10	9	10	3	4	11	5	4	8	12	7	6	1	7	15	0	19	153
sp|P26439|3BHS2_HUMAN 3 beta-hydroxysteroid dehydrogenase/Delta 5-->4-isomerase type 2 OS=Homo sapiens (Human) OX=9606 GN=HSD3B2 PE=1 SV=2	23	17	19	13	5	12	26	22	7	19	44	24	3	14	19	29	21	8	18	29	0	20	372
sp|Q96IR3|YV007_HUMAN Putative uncharacterized protein MGC15705 OS=Homo sapiens (Human) OX=9606 GN=- PE=5 SV=1	2	2	3	2	1	4	4	2	0	1	2	3	2	1	2	2	3	1	0	4	0	18	41
sp|O75665|OFD1_HUMAN Oral-facial-digital syndrome 1 protein OS=Homo sapiens (Human) OX=9606 GN=OFD1 PE=1 SV=1	62	59	43	43	8	73	131	29	22	43	119	96	24	29	34	93	33	2	22	47	0	20	1012
sp|P08183|MDR1_HUMAN ATP-dependent translocase ABCB1 OS=Homo sapiens (Human) OX=9606 GN=ABCB1 PE=1 SV=3	117	63	53	56	7	53	75	99	19	104	119	85	32	70	29	88	69	11	35	96	0	20	1280
sp|Q5T7B8|KIF24_HUMAN Kinesin-like protein KIF24 OS=Homo sapiens (Human) OX=9606 GN=KIF24 PE=1 SV=2	82	80	44	72	24	85	96	90	48	57	116	80	21	40	89	145	84	14	30	71	0	20	1368
sp|Q96A70|AZIN2_HUMAN Antizyme inhibitor 2 OS=Homo sapiens (Human) OX=9606 GN=AZIN2 PE=1 SV=1	41	12	10	22	18	15	30	38	14	23	45	25	12	22	21	35	19	6	12	40	0	20	460
sp|Q8IVN3|MSTN1_HUMAN Musculoskeletal embryonic nuclear protein 1 OS=Homo sapiens (Human) OX=9606 GN=MUSTN1 PE=3 SV=2	8	5	2	2	1	5	7	7	0	2	2	11	2	3	6	6	7	0	1	5	0	18	82
sp|P55263|ADK_HUMAN Adenosine kinase OS=Homo sapiens (Human) OX=9606 GN=ADK PE=1 SV=2	39	12	15	21	7	16	29	19	10	25	27	34	8	21	14	16	19	2	9	19	0	20	362
sp|Q92733|PRCC_HUMAN Proline-rich protein PRCC OS=Homo sapiens (Human) OX=9606 GN=PRCC PE=1 SV=1	48	15	11	23	0	23	43	42	4	12	43	36	6	15	75	37	27	3	14	14	0	19	491
sp|O75339|CILP1_HUMAN Cartilage intermediate layer protein 1 OS=Homo sapiens (Human) OX=9606 GN=CILP PE=1 SV=4	82	92	51	62	40	55	68	81	18	44	83	59	26	48	79	80	77	15	38	86	0	20	1184
sp|P0DKB6|MPC1L_HUMAN Mitochondrial pyruvate carrier 1-like protein OS=Homo sapiens (Human) OX=9606 GN=MPC1L PE=2 SV=1	21	10	3	3	2	6	4	8	2	4	10	6	8	7	9	12	6	3	7	5	0	20	136
sp|Q14651|PLSI_HUMAN Plastin-1 OS=Homo sapiens (Human) OX=9606 GN=PLS1 PE=1 SV=2	42	20	53	37	7	14	50	35	9	50	75	51	15	19	24	46	25	8	15	34	0	20	629
sp|Q5T751|LCE1C_HUMAN Late cornified envelope protein 1C OS=Homo sapiens (Human) OX=9606 GN=LCE1C PE=2 SV=1	0	5	0	0	24	9	0	21	5	0	1	6	1	0	16	26	2	0	0	2	0	12	118
sp|Q96B54|ZN428_HUMAN Zinc finger protein 428 OS=Homo sapiens (Human) OX=9606 GN=ZNF428 PE=1 SV=2	15	13	1	11	7	5	43	21	5	0	11	2	2	2	23	10	10	0	5	2	0	18	188
sp|Q7Z2V1|TNT_HUMAN Protein TNT OS=Homo sapiens (Human) OX=9606 GN=C16orf82 PE=2 SV=1	10	10	5	5	1	17	16	19	11	5	21	8	2	2	19	40	13	1	3	9	0	20	217
sp|Q9Y2W7|CSEN_HUMAN Calsenilin OS=Homo sapiens (Human) OX=9606 GN=KCNIP3 PE=1 SV=1	16	11	8	18	4	14	21	16	7	13	26	18	9	15	9	16	14	3	7	11	0	20	256
sp|Q6S5H5|POTEG_HUMAN POTE ankyrin domain family member G OS=Homo sapiens (Human) OX=9606 GN=POTEG PE=2 SV=5	30	25	26	35	17	24	40	35	18	16	47	47	16	9	20	43	20	8	10	22	0	20	508
sp|Q6DJT9|PLAG1_HUMAN Zinc finger protein PLAG1 OS=Homo sapiens (Human) OX=9606 GN=PLAG1 PE=1 SV=1	19	18	17	25	16	27	24	27	28	13	51	42	12	22	32	59	34	0	13	21	0	19	500
sp|P53985|MOT1_HUMAN Monocarboxylate transporter 1 OS=Homo sapiens (Human) OX=9606 GN=SLC16A1 PE=1 SV=3	38	14	16	14	12	12	19	57	6	32	52	29	14	34	28	38	21	6	19	39	0	20	500
sp|Q3MIV0|KR221_HUMAN Keratin-associated protein 22-1 OS=Homo sapiens (Human) OX=9606 GN=KRTAP22-1 PE=3 SV=2	2	1	2	1	6	1	1	11	1	0	2	1	1	3	1	5	0	2	7	0	0	17	48
sp|Q8WWP7|GIMA1_HUMAN GTPase IMAP family member 1 OS=Homo sapiens (Human) OX=9606 GN=GIMAP1 PE=1 SV=1	28	34	7	12	6	14	25	29	7	4	35	9	5	8	8	18	15	10	5	27	0	20	306
sp|Q5VSD8|YI029_HUMAN Putative uncharacterized protein LOC401522 OS=Homo sapiens (Human) OX=9606 GN=- PE=4 SV=2	4	3	1	2	3	4	0	8	2	1	9	5	1	2	11	8	10	0	1	4	0	18	79
sp|Q96S96|PEBP4_HUMAN Phosphatidylethanolamine-binding protein 4 OS=Homo sapiens (Human) OX=9606 GN=PEBP4 PE=1 SV=3	18	12	8	12	5	13	16	15	6	8	20	13	8	10	16	11	11	5	7	13	0	20	227
sp|Q13530|SERC3_HUMAN Serine incorporator 3 OS=Homo sapiens (Human) OX=9606 GN=SERINC3 PE=2 SV=2	30	13	16	18	15	9	14	26	6	33	56	20	15	29	20	56	29	12	20	36	0	20	473
sp|Q9NPG3|UBN1_HUMAN Ubinuclein-1 OS=Homo sapiens (Human) OX=9606 GN=UBN1 PE=1 SV=2	103	43	25	49	10	55	80	89	31	29	104	120	14	33	92	145	38	4	16	54	0	20	1134
sp|Q8IVW8|SPNS2_HUMAN Protein spinster homolog 2 OS=Homo sapiens (Human) OX=9606 GN=SPNS2 PE=1 SV=2	68	33	8	18	15	20	12	62	5	32	58	15	12	30	24	43	33	9	13	39	0	20	549
sp|Q9UBS0|KS6B2_HUMAN Ribosomal protein S6 kinase beta-2 OS=Homo sapiens (Human) OX=9606 GN=RPS6KB2 PE=1 SV=2	33	33	11	23	7	12	37	39	13	20	53	26	8	24	46	31	27	4	11	24	0	20	482
sp|Q8NH93|OR1L3_HUMAN Olfactory receptor 1L3 OS=Homo sapiens (Human) OX=9606 GN=OR1L3 PE=2 SV=1	18	13	17	7	12	6	6	9	8	30	45	15	12	23	12	32	19	0	15	25	0	19	324
sp|P39687|AN32A_HUMAN Acidic leucine-rich nuclear phosphoprotein 32 family member A OS=Homo sapiens (Human) OX=9606 GN=ANP32A PE=1 SV=1	5	11	16	32	2	3	57	17	2	5	32	16	2	4	7	12	8	0	6	12	0	19	249
sp|O60216|RAD21_HUMAN Double-strand-break repair protein rad21 homolog OS=Homo sapiens (Human) OX=9606 GN=RAD21 PE=1 SV=2	37	30	26	55	5	33	74	28	11	35	61	42	19	21	48	34	27	5	9	31	0	20	631
sp|A8MZG2|CP090_HUMAN Uncharacterized protein C16orf90 OS=Homo sapiens (Human) OX=9606 GN=C16orf90 PE=2 SV=3	15	15	3	6	7	9	11	19	5	2	23	5	4	2	23	20	5	4	2	2	0	20	182
sp|Q6P161|RM54_HUMAN 39S ribosomal protein L54, mitochondrial OS=Homo sapiens (Human) OX=9606 GN=MRPL54 PE=1 SV=1	12	11	6	7	1	3	10	10	1	2	15	13	4	2	10	5	9	6	5	6	0	20	138
sp|P08319|ADH4_HUMAN All-trans-retinol dehydrogenase [NAD(+)] ADH4 OS=Homo sapiens (Human) OX=9606 GN=ADH4 PE=1 SV=5	35	8	13	20	16	6	17	39	6	31	30	33	5	19	17	23	27	3	5	27	0	20	380
sp|P49223|SPIT3_HUMAN Kunitz-type protease inhibitor 3 OS=Homo sapiens (Human) OX=9606 GN=SPINT3 PE=3 SV=3	4	4	5	2	7	3	8	6	0	2	13	6	3	9	3	4	6	1	2	1	0	19	89
tr|A0A087WUV0|A0A087WUV0_HUMAN Uncharacterized protein OS=Homo sapiens (Human) OX=9606 GN=ENSG00000233757 PE=1 SV=1	26	27	17	15	25	36	56	31	35	21	35	45	3	17	21	49	31	3	15	14	0	20	522
sp|Q9H222|ABCG5_HUMAN ATP-binding cassette sub-family G member 5 OS=Homo sapiens (Human) OX=9606 GN=ABCG5 PE=1 SV=1	37	38	24	21	13	29	27	46	13	40	84	24	20	37	27	55	38	5	19	54	0	20	651
sp|Q14642|I5P1_HUMAN Inositol polyphosphate-5-phosphatase A OS=Homo sapiens (Human) OX=9606 GN=INPP5A PE=1 SV=1	28	21	17	27	10	13	30	17	15	13	34	33	11	29	16	27	16	5	19	31	0	20	412
sp|P09661|RU2A_HUMAN U2 small nuclear ribonucleoprotein A' OS=Homo sapiens (Human) OX=9606 GN=SNRPA1 PE=1 SV=2	18	19	14	17	2	10	20	19	1	14	34	21	3	6	12	11	14	0	6	14	0	19	255
sp|P53007|TXTP_HUMAN Tricarboxylate transport protein, mitochondrial OS=Homo sapiens (Human) OX=9606 GN=SLC25A1 PE=1 SV=2	27	22	10	11	6	11	11	34	7	16	30	20	7	13	17	12	18	3	10	26	0	20	311
sp|P54852|EMP3_HUMAN Epithelial membrane protein 3 OS=Homo sapiens (Human) OX=9606 GN=EMP3 PE=1 SV=1	13	5	5	3	7	3	6	10	4	11	30	6	4	9	3	11	9	7	6	11	0	20	163
sp|Q6ZSI9|CAN12_HUMAN Calpain-12 OS=Homo sapiens (Human) OX=9606 GN=CAPN12 PE=2 SV=1	54	59	15	37	19	33	53	66	25	15	90	16	11	38	33	43	36	19	16	41	0	20	719
sp|Q9BRP7|FDXA1_HUMAN Ferredoxin-fold anticodon-binding domain-containing protein 1 OS=Homo sapiens (Human) OX=9606 GN=FDXACB1 PE=1 SV=3	36	28	19	32	22	37	36	36	20	30	75	33	8	42	31	50	28	10	11	40	0	20	624
sp|P0DP03|HVC05_HUMAN Immunoglobulin heavy variable 3-30-5 OS=Homo sapiens (Human) OX=9606 GN=IGHV3-30-5 PE=3 SV=1	9	7	4	4	3	6	4	12	1	2	11	5	3	5	2	13	4	3	7	12	0	20	117
sp|P30550|GRPR_HUMAN Gastrin-releasing peptide receptor OS=Homo sapiens (Human) OX=9606 GN=GRPR PE=2 SV=1	26	14	19	12	14	8	9	13	16	37	48	15	9	23	18	37	19	4	16	27	0	20	384
sp|Q96CP6|ASTRA_HUMAN Protein Aster-A OS=Homo sapiens (Human) OX=9606 GN=GRAMD1A PE=1 SV=2	39	46	15	36	12	35	51	45	19	32	85	34	6	27	52	87	42	13	15	33	0	20	724
sp|Q96L03|SPT17_HUMAN Spermatogenesis-associated protein 17 OS=Homo sapiens (Human) OX=9606 GN=SPATA17 PE=2 SV=1	20	35	16	12	4	21	28	9	5	17	31	34	9	15	19	23	14	8	23	18	0	20	361
sp|O15530|PDPK1_HUMAN 3-phosphoinositide-dependent protein kinase 1 OS=Homo sapiens (Human) OX=9606 GN=PDPK1 PE=1 SV=1	33	30	18	28	9	28	41	34	15	25	56	38	10	27	38	44	26	6	23	27	0	20	556
sp|A8MUX0|KR161_HUMAN Keratin-associated protein 16-1 OS=Homo sapiens (Human) OX=9606 GN=KRTAP16-1 PE=3 SV=1	27	20	3	8	95	27	25	9	0	15	14	10	2	5	72	96	31	1	11	46	0	19	517
sp|P61201|CSN2_HUMAN COP9 signalosome complex subunit 2 OS=Homo sapiens (Human) OX=9606 GN=COPS2 PE=1 SV=1	22	17	29	32	5	23	40	16	10	30	53	41	14	15	12	26	22	3	20	13	0	20	443
sp|O95996|APCL_HUMAN Adenomatous polyposis coli protein 2 OS=Homo sapiens (Human) OX=9606 GN=APC2 PE=1 SV=1	300	208	33	92	38	100	161	175	45	44	226	78	28	32	239	248	110	14	24	108	0	20	2303
sp|Q13363|CTBP1_HUMAN C-terminal-binding protein 1 OS=Homo sapiens (Human) OX=9606 GN=CTBP1 PE=1 SV=2	50	28	15	23	8	15	26	35	20	24	46	14	8	11	28	24	21	3	7	34	0	20	440
sp|Q96HT8|MR1L1_HUMAN MORF4 family-associated protein 1-like 1 OS=Homo sapiens (Human) OX=9606 GN=MRFAP1L1 PE=1 SV=1	10	9	3	6	1	4	27	2	3	8	12	6	6	2	5	9	2	2	1	9	0	20	127
sp|O75426|FBX24_HUMAN F-box only protein 24 OS=Homo sapiens (Human) OX=9606 GN=FBXO24 PE=1 SV=2	36	44	9	22	23	35	30	52	15	16	68	25	13	23	33	36	28	7	22	43	0	20	580
sp|Q9NVP2|ASF1B_HUMAN Histone chaperone ASF1B OS=Homo sapiens (Human) OX=9606 GN=ASF1B PE=1 SV=1	11	8	14	11	6	6	16	12	4	13	20	4	5	10	19	13	7	2	5	16	0	20	202
sp|P49356|FNTB_HUMAN Protein farnesyltransferase subunit beta OS=Homo sapiens (Human) OX=9606 GN=FNTB PE=1 SV=1	32	18	9	18	16	25	30	35	16	18	51	15	8	17	28	31	18	8	20	24	0	20	437
sp|Q9UQ10|DHDH_HUMAN Trans-1,2-dihydrobenzene-1,2-diol dehydrogenase OS=Homo sapiens (Human) OX=9606 GN=DHDH PE=1 SV=1	35	18	6	13	8	13	25	25	9	13	30	19	8	12	18	21	16	4	6	35	0	20	334
sp|Q8N743|KI3L3_HUMAN Killer cell immunoglobulin-like receptor 3DL3 OS=Homo sapiens (Human) OX=9606 GN=KIR3DL3 PE=2 SV=2	23	24	15	15	10	15	18	33	17	11	40	9	9	19	37	37	25	6	9	38	0	20	410
sp|Q8TEW6|DOK4_HUMAN Docking protein 4 OS=Homo sapiens (Human) OX=9606 GN=DOK4 PE=1 SV=2	20	22	11	14	12	15	25	19	7	14	31	21	5	10	16	26	22	5	14	17	0	20	326
sp|P56856|CLD18_HUMAN Claudin-18 OS=Homo sapiens (Human) OX=9606 GN=CLDN18 PE=1 SV=1	25	8	8	7	8	8	7	30	3	15	21	9	15	12	6	21	21	4	11	22	0	20	261
sp|Q86U06|RBM23_HUMAN Probable RNA-binding protein 23 OS=Homo sapiens (Human) OX=9606 GN=RBM23 PE=1 SV=1	41	51	17	27	5	18	26	34	9	18	34	20	10	16	21	45	19	1	9	18	0	20	439
sp|Q13797|ITA9_HUMAN Integrin alpha-9 OS=Homo sapiens (Human) OX=9606 GN=ITGA9 PE=1 SV=2	71	47	45	56	23	37	66	88	27	61	89	54	27	50	47	75	46	10	35	81	0	20	1035
sp|Q96DD0|LRC39_HUMAN Leucine-rich repeat-containing protein 39 OS=Homo sapiens (Human) OX=9606 GN=LRRC39 PE=1 SV=1	8	20	24	14	5	15	34	12	6	21	54	24	9	8	15	18	22	6	2	18	0	20	335
sp|Q9NUG4|CCM2L_HUMAN Cerebral cavernous malformations 2 protein-like OS=Homo sapiens (Human) OX=9606 GN=CCM2L PE=2 SV=3	46	48	7	42	15	21	35	68	14	22	59	16	7	16	34	52	23	9	19	18	0	20	571
sp|Q9NRL3|STRN4_HUMAN Striatin-4 OS=Homo sapiens (Human) OX=9606 GN=STRN4 PE=1 SV=2	75	38	19	54	13	25	55	70	25	23	71	38	11	19	52	65	34	9	10	47	0	20	753
sp|Q8TBP0|TBC16_HUMAN TBC1 domain family member 16 OS=Homo sapiens (Human) OX=9606 GN=TBC1D16 PE=2 SV=1	42	56	16	43	19	37	62	54	22	23	84	27	20	32	50	76	28	11	21	44	0	20	767
sp|O75840|KLF7_HUMAN Krueppel-like factor 7 OS=Homo sapiens (Human) OX=9606 GN=KLF7 PE=1 SV=1	28	18	5	14	13	13	20	14	13	6	34	19	2	9	14	33	20	3	7	17	0	20	302
sp|Q9NRM6|I17RB_HUMAN Interleukin-17 receptor B OS=Homo sapiens (Human) OX=9606 GN=IL17RB PE=1 SV=2	28	17	21	21	22	20	22	28	15	23	48	33	10	21	29	41	37	9	15	42	0	20	502
sp|Q96BR5|COA7_HUMAN Cytochrome c oxidase assembly factor 7 OS=Homo sapiens (Human) OX=9606 GN=COA7 PE=1 SV=2	23	7	10	19	13	12	15	21	7	3	19	21	8	9	6	9	5	1	12	11	0	20	231
sp|Q6VUC0|AP2E_HUMAN Transcription factor AP-2-epsilon OS=Homo sapiens (Human) OX=9606 GN=TFAP2E PE=2 SV=1	68	24	7	17	9	15	22	41	13	8	60	20	7	11	46	31	14	1	11	17	0	20	442
sp|O95750|FGF19_HUMAN Fibroblast growth factor 19 OS=Homo sapiens (Human) OX=9606 GN=FGF19 PE=1 SV=1	15	16	2	11	5	5	14	19	10	6	26	7	7	8	14	20	4	3	7	17	0	20	216
sp|Q9HCP6|HHATL_HUMAN Protein-cysteine N-palmitoyltransferase HHAT-like protein OS=Homo sapiens (Human) OX=9606 GN=HHATL PE=2 SV=1	49	23	12	18	11	14	24	35	13	21	71	17	14	36	21	30	23	15	19	38	0	20	504
sp|O94805|ACL6B_HUMAN Actin-like protein 6B OS=Homo sapiens (Human) OX=9606 GN=ACTL6B PE=1 SV=1	28	16	16	21	8	17	31	41	10	23	34	25	16	16	26	28	23	6	13	28	0	20	426
sp|Q13007|IL24_HUMAN Interleukin-24 OS=Homo sapiens (Human) OX=9606 GN=IL24 PE=1 SV=1	15	10	8	6	4	20	10	6	4	4	30	10	6	15	7	13	12	5	4	17	0	20	206
sp|Q96QT6|PHF12_HUMAN PHD finger protein 12 OS=Homo sapiens (Human) OX=9606 GN=PHF12 PE=1 SV=2	66	54	39	46	36	52	58	59	35	39	90	54	19	20	91	97	69	7	16	57	0	20	1004
sp|Q8NEA6|GLIS3_HUMAN Zinc finger protein GLIS3 OS=Homo sapiens (Human) OX=9606 GN=GLIS3 PE=2 SV=5	51	41	21	30	18	44	32	57	40	24	69	26	10	22	89	106	37	3	21	34	0	20	775
sp|Q17R89|RHG44_HUMAN Rho GTPase-activating protein 44 OS=Homo sapiens (Human) OX=9606 GN=ARHGAP44 PE=1 SV=1	73	35	22	33	11	54	59	44	16	30	86	49	26	17	81	82	40	7	15	38	0	20	818
sp|Q5VV11|U633B_HUMAN Putative UPF0633 protein ENSP00000303136 OS=Homo sapiens (Human) OX=9606 GN=- PE=5 SV=1	5	18	3	3	2	3	3	6	4	2	7	1	1	2	13	11	3	2	1	4	0	20	94
sp|Q5T870|PRR9_HUMAN Proline-rich protein 9 OS=Homo sapiens (Human) OX=9606 GN=PRR9 PE=4 SV=1	4	0	0	2	18	23	12	3	1	0	6	10	1	2	16	7	3	0	1	7	0	16	116
sp|Q5QGT7|RTP2_HUMAN Receptor-transporting protein 2 OS=Homo sapiens (Human) OX=9606 GN=RTP2 PE=1 SV=1	16	12	4	7	11	10	22	11	8	7	23	10	5	12	9	20	9	9	8	12	0	20	225
sp|Q7Z4K8|TRI46_HUMAN Tripartite motif-containing protein 46 OS=Homo sapiens (Human) OX=9606 GN=TRIM46 PE=2 SV=2	57	57	10	33	32	42	50	62	20	20	83	30	10	25	55	49	46	6	17	55	0	20	759
sp|A0A0A0MT76|LJ01_HUMAN Immunoglobulin lambda joining 1 OS=Homo sapiens (Human) OX=9606 GN=IGLJ1 PE=4 SV=1	1	4	0	1	2	3	1	3	0	0	5	1	0	2	6	4	3	2	1	3	0	16	42
sp|Q495M9|USH1G_HUMAN Usher syndrome type-1G protein OS=Homo sapiens (Human) OX=9606 GN=USH1G PE=1 SV=1	36	44	11	35	7	13	34	37	16	8	65	21	13	11	20	43	20	5	9	13	0	20	461
sp|Q4G0W2|DUS28_HUMAN Dual specificity phosphatase 28 OS=Homo sapiens (Human) OX=9606 GN=DUSP28 PE=1 SV=1	32	14	3	3	6	9	12	16	2	0	18	4	4	4	18	10	3	1	3	14	0	19	176
sp|A7E2Y1|MYH7B_HUMAN Myosin-7B OS=Homo sapiens (Human) OX=9606 GN=MYH7B PE=1 SV=4	226	156	63	94	22	134	257	91	40	50	255	159	39	48	39	94	78	12	38	88	0	20	1983
sp|Q9NY64|GTR8_HUMAN Solute carrier family 2, facilitated glucose transporter member 8 OS=Homo sapiens (Human) OX=9606 GN=SLC2A8 PE=1 SV=3	61	20	3	9	9	15	19	47	5	19	66	9	15	31	31	33	18	13	8	46	0	20	477
sp|Q9Y277|VDAC3_HUMAN Voltage-dependent anion-selective channel protein 3 OS=Homo sapiens (Human) OX=9606 GN=VDAC3 PE=1 SV=1	22	4	19	14	6	6	11	32	4	11	26	27	4	15	4	22	26	5	12	13	0	20	283
sp|A0PK11|CLRN2_HUMAN Clarin-2 OS=Homo sapiens (Human) OX=9606 GN=CLRN2 PE=2 SV=1	25	6	6	5	5	9	12	17	5	19	31	10	4	15	7	13	7	5	6	25	0	20	232
sp|P10243|MYBA_HUMAN Myb-related protein A OS=Homo sapiens (Human) OX=9606 GN=MYBL1 PE=1 SV=2	35	37	43	40	11	42	66	32	18	38	66	66	16	21	45	63	53	14	15	31	0	20	752
sp|Q3SXP7|SHSL1_HUMAN Protein shisa-like-1 OS=Homo sapiens (Human) OX=9606 GN=SHISAL1 PE=2 SV=2	16	11	10	6	8	12	4	12	9	4	21	5	7	11	16	13	9	4	10	11	0	20	199
sp|Q8N9H6|CH031_HUMAN Putative uncharacterized protein C8orf31 OS=Homo sapiens (Human) OX=9606 GN=C8orf31 PE=5 SV=1	16	10	4	6	2	13	5	10	9	2	14	4	1	4	6	10	10	2	1	3	0	20	132
sp|Q9UHP6|RSP14_HUMAN Radial spoke head 14 homolog OS=Homo sapiens (Human) OX=9606 GN=RSPH14 PE=1 SV=1	39	14	14	10	6	18	29	12	11	22	49	22	11	8	13	20	17	1	7	25	0	20	348
sp|Q92966|SNPC3_HUMAN snRNA-activating protein complex subunit 3 OS=Homo sapiens (Human) OX=9606 GN=SNAPC3 PE=1 SV=1	24	27	12	32	17	10	35	31	14	18	38	19	7	22	21	23	20	5	16	20	0	20	411
sp|P69849|NOMO3_HUMAN Nodal modulator 3 OS=Homo sapiens (Human) OX=9606 GN=NOMO3 PE=3 SV=2	61	43	45	61	17	53	79	105	25	62	118	68	19	56	67	96	86	6	45	110	0	20	1222
sp|O00624|NPT3_HUMAN Sodium-dependent phosphate transport protein 3 OS=Homo sapiens (Human) OX=9606 GN=SLC17A2 PE=2 SV=2	35	13	10	11	11	14	6	37	6	50	56	11	11	28	22	47	30	8	11	22	0	20	439
sp|P05362|ICAM1_HUMAN Intercellular adhesion molecule 1 OS=Homo sapiens (Human) OX=9606 GN=ICAM1 PE=1 SV=2	36	30	22	15	14	31	34	36	5	12	62	23	5	10	50	33	49	5	12	48	0	20	532
sp|O95177|GAAS1_HUMAN Uncharacterized protein GAS8-AS1 OS=Homo sapiens (Human) OX=9606 GN=GAS8-AS1 PE=5 SV=1	16	5	0	1	11	6	5	9	5	2	4	3	3	0	18	20	7	2	0	8	0	17	125
sp|Q9UK08|GBG8_HUMAN Guanine nucleotide-binding protein G(I)/G(S)/G(O) subunit gamma-8 OS=Homo sapiens (Human) OX=9606 GN=GNG8 PE=1 SV=1	10	4	4	4	2	2	6	0	1	2	8	6	3	3	4	2	3	0	0	6	0	17	70
sp|Q12840|KIF5A_HUMAN Kinesin heavy chain isoform 5A OS=Homo sapiens (Human) OX=9606 GN=KIF5A PE=1 SV=2	67	55	49	54	15	65	118	45	26	48	104	91	20	22	28	82	51	2	30	60	0	20	1032
sp|Q6VB84|FX4L3_HUMAN Forkhead box protein D4-like 3 OS=Homo sapiens (Human) OX=9606 GN=FOXD4L3 PE=2 SV=2	46	46	10	15	16	15	20	31	14	12	41	13	3	13	56	29	12	5	9	11	0	20	417
sp|Q86SQ3|AGRE4_HUMAN Putative adhesion G protein-coupled receptor E4P OS=Homo sapiens (Human) OX=9606 GN=ADGRE4P PE=5 SV=1	20	15	18	11	24	11	17	35	13	33	60	24	6	28	15	38	30	8	17	34	0	20	457
sp|O95294|RASL1_HUMAN RasGAP-activating-like protein 1 OS=Homo sapiens (Human) OX=9606 GN=RASAL1 PE=1 SV=3	67	63	13	52	16	38	55	53	17	20	106	35	19	32	49	52	35	14	13	55	0	20	804
sp|Q13432|U119A_HUMAN Protein unc-119 homolog A OS=Homo sapiens (Human) OX=9606 GN=UNC119 PE=1 SV=1	10	17	8	15	3	9	17	20	5	13	14	12	5	16	25	19	10	0	9	13	0	19	240
sp|Q9NRJ7|PCDBG_HUMAN Protocadherin beta-16 OS=Homo sapiens (Human) OX=9606 GN=PCDHB16 PE=1 SV=3	51	42	39	41	7	31	55	50	13	30	94	26	11	31	52	67	48	3	17	68	0	20	776
sp|A0A1B0GVV1|SIM35_HUMAN Small integral membrane protein 35 OS=Homo sapiens (Human) OX=9606 GN=SMIM35 PE=3 SV=1	1	2	4	3	1	2	3	12	1	6	14	3	3	4	3	8	4	2	5	4	0	20	85
sp|Q86YJ6|THNS2_HUMAN Threonine synthase-like 2 OS=Homo sapiens (Human) OX=9606 GN=THNSL2 PE=2 SV=3	37	26	19	22	10	25	30	26	16	18	55	18	13	19	22	36	30	8	11	43	0	20	484
sp|Q99819|GDIR3_HUMAN Rho GDP-dissociation inhibitor 3 OS=Homo sapiens (Human) OX=9606 GN=ARHGDIG PE=1 SV=2	15	16	1	18	5	7	15	16	5	4	35	11	3	4	16	10	8	3	8	25	0	20	225
sp|A0A0A6YYC5|TVA14_HUMAN T cell receptor alpha variable 14/delta variable 4 OS=Homo sapiens (Human) OX=9606 GN=TRAV14DV4 PE=3 SV=5	9	3	3	5	2	10	5	8	0	5	11	6	5	5	4	14	7	2	7	5	0	19	116
sp|P0C7X0|F90AO_HUMAN Putative protein FAM90A24P OS=Homo sapiens (Human) OX=9606 GN=FAM90A24P PE=5 SV=1	47	38	9	16	10	26	26	34	13	3	40	29	9	8	64	47	19	4	2	20	0	20	464
sp|Q8TBE1|CNIH3_HUMAN Protein cornichon homolog 3 OS=Homo sapiens (Human) OX=9606 GN=CNIH3 PE=2 SV=1	14	7	4	6	10	3	7	1	5	10	24	4	5	16	7	10	5	4	11	7	0	20	160
sp|P31277|HXD11_HUMAN Homeobox protein Hox-D11 OS=Homo sapiens (Human) OX=9606 GN=HOXD11 PE=3 SV=3	48	21	10	11	6	15	19	50	2	4	16	16	6	16	41	23	7	2	15	10	0	20	338
sp|O43609|SPY1_HUMAN Protein sprouty homolog 1 OS=Homo sapiens (Human) OX=9606 GN=SPRY1 PE=1 SV=2	15	24	13	12	26	16	17	22	12	14	26	15	5	3	24	39	14	1	10	11	0	20	319
sp|P78560|CRADD_HUMAN Death domain-containing protein CRADD OS=Homo sapiens (Human) OX=9606 GN=CRADD PE=1 SV=1	12	15	7	9	1	15	16	11	6	9	31	8	5	6	10	12	9	3	3	11	0	20	199
sp|Q05048|CSTF1_HUMAN Cleavage stimulation factor subunit 1 OS=Homo sapiens (Human) OX=9606 GN=CSTF1 PE=1 SV=1	29	25	18	29	14	18	21	24	13	28	34	19	11	14	15	39	33	4	19	24	0	20	431
sp|P58876|H2B1D_HUMAN Histone H2B type 1-D OS=Homo sapiens (Human) OX=9606 GN=HIST1H2BD PE=1 SV=2	12	8	3	3	0	3	7	7	3	6	6	20	3	2	6	14	9	0	5	9	0	18	126
sp|Q14508|WFDC2_HUMAN WAP four-disulfide core domain protein 2 OS=Homo sapiens (Human) OX=9606 GN=WFDC2 PE=1 SV=2	9	3	7	6	17	9	5	11	0	1	14	5	2	5	8	9	6	0	0	7	0	17	124
sp|Q99603|TRGV9_HUMAN T cell receptor gamma variable 9 OS=Homo sapiens (Human) OX=9606 GN=TRGV9 PE=1 SV=1	7	5	1	3	3	4	9	8	3	9	12	5	1	2	4	14	13	2	6	11	0	20	122
sp|Q71RS6|NCKX5_HUMAN Sodium/potassium/calcium exchanger 5 OS=Homo sapiens (Human) OX=9606 GN=SLC24A5 PE=1 SV=1	36	18	15	18	15	14	19	42	3	52	62	16	13	27	20	43	32	11	18	26	0	20	500
sp|P47869|GBRA2_HUMAN Gamma-aminobutyric acid receptor subunit alpha-2 OS=Homo sapiens (Human) OX=9606 GN=GABRA2 PE=2 SV=2	31	19	28	23	4	11	17	18	6	25	39	31	16	26	22	31	39	9	20	36	0	20	451
sp|Q8IYJ0|PIANP_HUMAN PILR alpha-associated neural protein OS=Homo sapiens (Human) OX=9606 GN=PIANP PE=2 SV=1	22	23	5	11	3	11	11	30	6	10	27	3	4	9	49	23	13	6	3	13	0	20	282
sp|P32780|TF2H1_HUMAN General transcription factor IIH subunit 1 OS=Homo sapiens (Human) OX=9606 GN=GTF2H1 PE=1 SV=1	42	24	31	26	6	34	38	22	14	27	52	47	15	21	20	48	30	5	16	30	0	20	548
sp|Q6B0B8|TIGD3_HUMAN Tigger transposable element-derived protein 3 OS=Homo sapiens (Human) OX=9606 GN=TIGD3 PE=2 SV=1	46	32	6	19	12	18	40	34	10	14	60	27	6	19	35	37	14	9	7	26	0	20	471
sp|Q5VYJ5|MALR1_HUMAN MAM and LDL-receptor class A domain-containing protein 1 OS=Homo sapiens (Human) OX=9606 GN=MALRD1 PE=1 SV=4	118	83	97	154	113	102	121	146	68	110	181	92	34	113	95	208	128	50	51	92	0	20	2156
sp|Q9Y458|TBX22_HUMAN T-box transcription factor TBX22 OS=Homo sapiens (Human) OX=9606 GN=TBX22 PE=1 SV=3	22	25	22	22	9	26	32	35	14	21	43	28	16	21	40	69	25	6	18	26	0	20	520
sp|Q15904|VAS1_HUMAN V-type proton ATPase subunit S1 OS=Homo sapiens (Human) OX=9606 GN=ATP6AP1 PE=1 SV=2	49	21	14	23	3	22	17	24	9	14	65	12	14	25	27	42	30	11	15	33	0	20	470
sp|Q9BTL4|IER2_HUMAN Immediate early response gene 2 protein OS=Homo sapiens (Human) OX=9606 GN=IER2 PE=1 SV=1	31	20	3	7	5	8	23	9	4	1	22	9	7	4	25	21	8	1	2	13	0	20	223
sp|O43913|ORC5_HUMAN Origin recognition complex subunit 5 OS=Homo sapiens (Human) OX=9606 GN=ORC5 PE=1 SV=1	21	20	18	23	9	15	26	15	17	24	61	30	3	27	20	27	28	3	20	28	0	20	435
sp|Q9ULK2|AT7L1_HUMAN Ataxin-7-like protein 1 OS=Homo sapiens (Human) OX=9606 GN=ATXN7L1 PE=1 SV=3	63	41	36	33	16	21	30	43	30	20	68	68	17	19	88	158	47	4	9	50	0	20	861
sp|Q5T0N5|FBP1L_HUMAN Formin-binding protein 1-like OS=Homo sapiens (Human) OX=9606 GN=FNBP1L PE=1 SV=3	31	38	27	42	8	36	59	38	18	26	40	55	18	23	29	39	26	8	21	23	0	20	605
sp|P03897|NU3M_HUMAN NADH-ubiquinone oxidoreductase chain 3 OS=Homo sapiens (Human) OX=9606 GN=MT-ND3 PE=1 SV=1	8	1	4	3	1	3	5	3	0	9	28	3	8	8	8	6	7	4	3	3	0	19	115
sp|Q8NDX2|VGLU3_HUMAN Vesicular glutamate transporter 3 OS=Homo sapiens (Human) OX=9606 GN=SLC17A8 PE=1 SV=1	44	20	23	13	16	18	40	54	11	45	45	26	18	36	26	44	32	12	21	45	0	20	589
sp|Q969F0|FATE1_HUMAN Fetal and adult testis-expressed transcript protein OS=Homo sapiens (Human) OX=9606 GN=FATE1 PE=1 SV=1	20	16	10	3	0	12	18	14	6	5	17	9	11	3	6	11	7	4	3	8	0	19	183
sp|Q6XE24|RBMS3_HUMAN RNA-binding motif, single-stranded-interacting protein 3 OS=Homo sapiens (Human) OX=9606 GN=RBMS3 PE=1 SV=1	34	11	21	16	5	43	13	27	9	22	24	20	20	8	45	40	35	2	23	19	0	20	437
sp|Q86X10|RLGPB_HUMAN Ral GTPase-activating protein subunit beta OS=Homo sapiens (Human) OX=9606 GN=RALGAPB PE=1 SV=1	83	77	65	68	31	67	92	70	35	80	168	71	37	60	110	144	82	17	32	105	0	20	1494
sp|O95236|APOL3_HUMAN Apolipoprotein L3 OS=Homo sapiens (Human) OX=9606 GN=APOL3 PE=1 SV=3	47	30	11	8	7	18	35	27	8	21	39	16	4	16	8	36	32	5	11	23	0	20	402
sp|Q96GX5|GWL_HUMAN Serine/threonine-protein kinase greatwall OS=Homo sapiens (Human) OX=9606 GN=MASTL PE=1 SV=1	52	30	52	53	20	39	58	44	20	45	78	63	27	25	54	96	48	8	20	47	0	20	879
sp|Q56P03|EAPP_HUMAN E2F-associated phosphoprotein OS=Homo sapiens (Human) OX=9606 GN=EAPP PE=1 SV=4	17	18	12	26	8	11	32	9	8	5	17	23	9	6	13	25	15	1	12	18	0	20	285
tr|A0A0A0MS06|A0A0A0MS06_HUMAN Ig-like domain-containing protein OS=Homo sapiens (Human) OX=9606 GN=TRBV23-1 PE=4 SV=6	9	2	4	3	6	10	6	7	4	2	13	10	4	5	5	9	8	1	3	4	0	20	115
sp|Q8N5N4|CC022_HUMAN Uncharacterized protein C3orf22 OS=Homo sapiens (Human) OX=9606 GN=C3orf22 PE=2 SV=1	11	10	4	4	4	8	6	5	2	2	18	9	1	5	19	16	8	4	1	4	0	20	141
sp|P35498|SCN1A_HUMAN Sodium channel protein type 1 subunit alpha OS=Homo sapiens (Human) OX=9606 GN=SCN1A PE=1 SV=2	112	93	106	103	36	62	136	104	23	147	199	118	70	142	75	148	109	27	61	138	0	20	2009
sp|Q9P2W3|GBG13_HUMAN Guanine nucleotide-binding protein G(I)/G(S)/G(O) subunit gamma-13 OS=Homo sapiens (Human) OX=9606 GN=GNG13 PE=3 SV=1	2	1	3	4	1	3	8	2	0	4	7	9	4	2	6	2	2	3	1	3	0	19	67
sp|Q86X53|ERIC1_HUMAN Glutamate-rich protein 1 OS=Homo sapiens (Human) OX=9606 GN=ERICH1 PE=1 SV=1	42	22	9	41	4	19	58	27	13	11	29	35	7	9	27	35	27	3	7	18	0	20	443
sp|Q96L92|SNX27_HUMAN Sorting nexin-27 OS=Homo sapiens (Human) OX=9606 GN=SNX27 PE=1 SV=2	34	34	24	26	11	25	47	47	17	25	38	30	11	26	20	29	24	6	23	44	0	20	541
sp|P34998|CRFR1_HUMAN Corticotropin-releasing factor receptor 1 OS=Homo sapiens (Human) OX=9606 GN=CRHR1 PE=1 SV=1	31	29	22	9	14	15	15	27	13	30	46	14	8	28	18	32	21	14	19	39	0	20	444
sp|P62841|RS15_HUMAN 40S ribosomal protein S15 OS=Homo sapiens (Human) OX=9606 GN=RPS15 PE=1 SV=2	5	15	3	4	0	7	10	10	5	7	14	16	8	5	8	7	6	0	6	9	0	18	145
sp|Q06520|ST2A1_HUMAN Bile salt sulfotransferase OS=Homo sapiens (Human) OX=9606 GN=SULT2A1 PE=1 SV=3	9	12	9	15	3	9	26	13	5	15	29	24	10	22	13	25	11	12	9	14	0	20	285
sp|Q9NVC3|S38A7_HUMAN Putative sodium-coupled neutral amino acid transporter 7 OS=Homo sapiens (Human) OX=9606 GN=SLC38A7 PE=1 SV=1	49	15	9	15	12	15	20	39	2	37	48	12	12	27	21	28	28	12	13	48	0	20	462
sp|Q9H6S0|YTDC2_HUMAN 3'-5' RNA helicase YTHDC2 OS=Homo sapiens (Human) OX=9606 GN=YTHDC2 PE=1 SV=2	103	95	53	74	25	65	94	84	32	72	147	87	36	59	76	122	77	21	24	84	0	20	1430
sp|Q9NXU5|ARL15_HUMAN ADP-ribosylation factor-like protein 15 OS=Homo sapiens (Human) OX=9606 GN=ARL15 PE=1 SV=1	16	10	7	14	7	9	13	10	4	10	27	12	4	8	11	18	6	2	7	9	0	20	204
sp|Q8IU81|I2BP1_HUMAN Interferon regulatory factor 2-binding protein 1 OS=Homo sapiens (Human) OX=9606 GN=IRF2BP1 PE=1 SV=1	78	44	9	18	16	24	42	66	11	7	51	22	9	18	64	38	20	7	11	29	0	20	584
sp|P49767|VEGFC_HUMAN Vascular endothelial growth factor C OS=Homo sapiens (Human) OX=9606 GN=VEGFC PE=1 SV=1	31	24	21	17	38	20	29	21	10	10	30	25	9	16	26	33	24	5	12	18	0	20	419
sp|Q5VV41|ARHGG_HUMAN Rho guanine nucleotide exchange factor 16 OS=Homo sapiens (Human) OX=9606 GN=ARHGEF16 PE=1 SV=1	52	55	14	36	5	49	59	39	21	24	82	38	16	25	42	62	29	7	13	41	0	20	709
sp|Q8NBP7|PCSK9_HUMAN Proprotein convertase subtilisin/kexin type 9 OS=Homo sapiens (Human) OX=9606 GN=PCSK9 PE=1 SV=3	74	47	13	28	26	30	46	61	27	18	72	15	9	16	39	53	42	9	11	56	0	20	692
sp|P63302|SELW_HUMAN Selenoprotein W OS=Homo sapiens (Human) OX=9606 GN=SELENOW PE=1 SV=3	10	2	0	4	2	3	5	10	1	3	9	12	2	4	2	3	3	0	4	7	1	18	87
sp|P84022|SMAD3_HUMAN Mothers against decapentaplegic homolog 3 OS=Homo sapiens (Human) OX=9606 GN=SMAD3 PE=1 SV=1	20	22	25	14	15	20	29	24	15	19	37	19	10	15	36	33	23	9	13	27	0	20	425
sp|P22234|PUR6_HUMAN Multifunctional protein ADE2 OS=Homo sapiens (Human) OX=9606 GN=PAICS PE=1 SV=3	31	16	16	20	13	19	31	31	5	27	40	35	7	16	20	30	22	10	7	29	0	20	425
sp|P51788|CLCN2_HUMAN Chloride channel protein 2 OS=Homo sapiens (Human) OX=9606 GN=CLCN2 PE=1 SV=2	92	59	14	26	17	34	56	65	16	47	99	32	23	47	54	66	53	14	17	67	0	20	898
sp|P21860|ERBB3_HUMAN Receptor tyrosine-protein kinase erbB-3 OS=Homo sapiens (Human) OX=9606 GN=ERBB3 PE=1 SV=1	70	81	58	63	60	51	91	122	46	45	134	51	34	35	93	99	69	15	41	84	0	20	1342
sp|Q02930|CREB5_HUMAN Cyclic AMP-responsive element-binding protein 5 OS=Homo sapiens (Human) OX=9606 GN=CREB5 PE=1 SV=3	28	26	24	11	8	47	28	20	46	13	36	18	31	7	53	51	35	1	3	22	0	20	508
sp|Q9NZD4|AHSP_HUMAN Alpha-hemoglobin-stabilizing protein OS=Homo sapiens (Human) OX=9606 GN=AHSP PE=1 SV=1	6	4	7	6	0	7	9	2	2	2	14	6	3	5	7	7	3	1	4	7	0	19	102
sp|P13489|RINI_HUMAN Ribonuclease inhibitor OS=Homo sapiens (Human) OX=9606 GN=RNH1 PE=1 SV=2	32	24	17	27	32	24	35	32	5	12	92	16	3	4	14	45	13	6	3	25	0	20	461
sp|Q9UBF6|RBX2_HUMAN RING-box protein 2 OS=Homo sapiens (Human) OX=9606 GN=RNF7 PE=1 SV=1	8	4	6	8	12	7	7	7	3	2	5	7	5	2	1	10	2	6	0	11	0	19	113
sp|Q6ISS4|LAIR2_HUMAN Leukocyte-associated immunoglobulin-like receptor 2 OS=Homo sapiens (Human) OX=9606 GN=LAIR2 PE=1 SV=1	10	8	2	7	3	3	12	16	5	4	14	4	2	6	14	18	9	1	5	9	0	20	152
sp|O15090|ZN536_HUMAN Zinc finger protein 536 OS=Homo sapiens (Human) OX=9606 GN=ZNF536 PE=1 SV=3	92	59	43	71	31	72	87	111	54	27	124	93	38	35	91	145	43	7	20	57	0	20	1300
sp|Q5T2D2|TRML2_HUMAN Trem-like transcript 2 protein OS=Homo sapiens (Human) OX=9606 GN=TREML2 PE=1 SV=2	17	20	7	12	7	11	8	24	3	10	35	16	11	8	26	34	31	5	12	24	0	20	321
sp|Q06643|TNFC_HUMAN Lymphotoxin-beta OS=Homo sapiens (Human) OX=9606 GN=LTB PE=1 SV=1	23	14	1	9	1	14	13	41	2	3	36	4	3	7	18	10	16	2	9	18	0	20	244
sp|Q6MZN7|HCP5_HUMAN HLA class I histocompatibility antigen protein P5 OS=Homo sapiens (Human) OX=9606 GN=HCP5 PE=2 SV=1	5	6	4	3	3	2	5	17	6	3	21	3	6	2	9	21	6	5	1	4	0	20	132
sp|Q6ZVH7|ESPNL_HUMAN Espin-like protein OS=Homo sapiens (Human) OX=9606 GN=ESPNL PE=2 SV=3	116	75	14	47	22	45	70	97	41	22	121	20	12	26	86	71	47	17	12	44	0	20	1005
sp|Q8N8E2|ZN513_HUMAN Zinc finger protein 513 OS=Homo sapiens (Human) OX=9606 GN=ZNF513 PE=1 SV=2	36	43	11	19	34	15	41	74	28	1	49	18	8	13	58	41	24	3	12	13	0	20	541
sp|H7C241|CLD34_HUMAN Claudin-34 OS=Homo sapiens (Human) OX=9606 GN=CLDN34 PE=3 SV=2	13	10	9	6	6	9	6	15	1	16	17	4	11	20	10	17	15	4	10	15	0	20	214
sp|O95231|VENTX_HUMAN Homeobox protein VENTX OS=Homo sapiens (Human) OX=9606 GN=VENTX PE=1 SV=1	24	17	4	4	6	20	10	23	7	2	28	6	8	9	32	32	13	4	2	7	0	20	258
sp|P41240|CSK_HUMAN Tyrosine-protein kinase CSK OS=Homo sapiens (Human) OX=9606 GN=CSK PE=1 SV=1	33	21	15	24	10	13	34	33	11	17	46	35	13	15	19	24	22	8	20	37	0	20	450
sp|P51677|CCR3_HUMAN C-C chemokine receptor type 3 OS=Homo sapiens (Human) OX=9606 GN=CCR3 PE=1 SV=1	19	19	7	9	9	2	17	15	13	28	51	11	11	27	13	21	27	5	20	31	0	20	355
sp|P98095|FBLN2_HUMAN Fibulin-2 OS=Homo sapiens (Human) OX=9606 GN=FBLN2 PE=1 SV=2	113	56	40	55	101	59	102	113	33	35	84	25	12	30	94	67	63	7	32	63	0	20	1184
sp|P38935|SMBP2_HUMAN DNA-binding protein SMUBP-2 OS=Homo sapiens (Human) OX=9606 GN=IGHMBP2 PE=1 SV=3	99	79	26	43	16	57	74	65	30	33	111	57	9	26	51	79	52	3	16	67	0	20	993
sp|Q9BZM5|ULBP2_HUMAN UL16-binding protein 2 OS=Homo sapiens (Human) OX=9606 GN=ULBP2 PE=1 SV=1	19	10	5	12	9	10	12	16	5	12	31	14	9	10	15	16	18	7	4	12	0	20	246
sp|Q8TAT2|FGFP3_HUMAN Fibroblast growth factor-binding protein 3 OS=Homo sapiens (Human) OX=9606 GN=FGFBP3 PE=1 SV=1	37	26	9	5	9	7	17	25	7	0	25	13	2	6	30	17	9	4	3	7	0	19	258
sp|P06310|KV230_HUMAN Immunoglobulin kappa variable 2-30 OS=Homo sapiens (Human) OX=9606 GN=IGKV2-30 PE=3 SV=2	3	8	3	6	2	8	2	12	1	3	13	2	4	3	9	17	6	3	5	10	0	20	120
sp|Q6ZSG2|INSY2_HUMAN Inhibitory synaptic factor 2A OS=Homo sapiens (Human) OX=9606 GN=INSYN2A PE=2 SV=1	42	28	18	19	16	32	40	23	9	12	40	35	8	8	41	40	31	3	11	23	0	20	479
sp|Q9UII5|ZN107_HUMAN Zinc finger protein 107 OS=Homo sapiens (Human) OX=9606 GN=ZNF107 PE=1 SV=1	28	27	49	7	50	26	72	48	55	41	39	122	3	39	22	51	58	2	31	13	0	20	783
sp|P10635|CP2D6_HUMAN Cytochrome P450 2D6 OS=Homo sapiens (Human) OX=9606 GN=CYP2D6 PE=1 SV=2	41	39	12	23	6	22	30	33	16	15	66	12	10	33	38	23	25	7	6	40	0	20	497
sp|Q8NEV9|IL27A_HUMAN Interleukin-27 subunit alpha OS=Homo sapiens (Human) OX=9606 GN=IL27 PE=1 SV=2	15	21	3	5	1	16	22	20	7	1	53	3	4	9	18	16	9	7	2	11	0	20	243
sp|Q9H2F3|3BHS7_HUMAN 3 beta-hydroxysteroid dehydrogenase type 7 OS=Homo sapiens (Human) OX=9606 GN=HSD3B7 PE=1 SV=2	35	27	10	10	6	16	21	35	13	8	44	7	7	14	20	12	23	8	16	37	0	20	369
sp|Q86YG4|NT5D4_HUMAN 5'-nucleotidase domain-containing protein 4 OS=Homo sapiens (Human) OX=9606 GN=NT5DC4 PE=2 SV=2	23	20	16	25	14	16	26	26	12	21	53	21	11	24	16	32	21	6	22	23	0	20	428
sp|Q96MV8|ZDH15_HUMAN Palmitoyltransferase ZDHHC15 OS=Homo sapiens (Human) OX=9606 GN=ZDHHC15 PE=1 SV=1	13	15	14	11	15	10	18	16	10	14	34	19	9	26	16	24	16	10	17	30	0	20	337
sp|Q9BY89|K1671_HUMAN Uncharacterized protein KIAA1671 OS=Homo sapiens (Human) OX=9606 GN=KIAA1671 PE=1 SV=2	145	143	30	94	18	69	153	128	36	31	127	117	28	39	200	207	102	26	16	97	0	20	1806
sp|Q5VUY2|ADCL4_HUMAN Arylacetamide deacetylase-like 4 OS=Homo sapiens (Human) OX=9606 GN=AADACL4 PE=3 SV=1	29	21	13	22	11	13	15	22	12	26	51	21	6	26	26	24	13	7	15	34	0	20	407
sp|P48067|SC6A9_HUMAN Sodium- and chloride-dependent glycine transporter 1 OS=Homo sapiens (Human) OX=9606 GN=SLC6A9 PE=1 SV=3	55	27	27	21	17	25	17	60	14	45	82	15	22	46	42	52	33	17	35	54	0	20	706
sp|A0A075B6R2|HV404_HUMAN Immunoglobulin heavy variable 4-4 OS=Homo sapiens (Human) OX=9606 GN=IGHV4-4 PE=3 SV=2	7	4	4	2	2	5	3	9	2	4	13	7	1	3	6	19	6	6	4	10	0	20	117
sp|A0PJX2|TLDC2_HUMAN TLD domain-containing protein 2 OS=Homo sapiens (Human) OX=9606 GN=TLDC2 PE=2 SV=1	11	14	4	10	4	11	19	21	2	4	24	4	4	17	13	25	10	5	3	10	0	20	215
sp|Q16134|ETFD_HUMAN Electron transfer flavoprotein-ubiquinone oxidoreductase, mitochondrial OS=Homo sapiens (Human) OX=9606 GN=ETFDH PE=1 SV=2	43	27	26	28	14	19	38	61	23	34	59	39	9	22	41	28	29	13	24	40	0	20	617
sp|Q969X0|RIPL2_HUMAN RILP-like protein 2 OS=Homo sapiens (Human) OX=9606 GN=RILPL2 PE=1 SV=1	9	18	7	10	1	10	33	16	1	4	26	15	5	6	13	10	7	0	3	17	0	19	211
sp|Q5HYK9|ZN667_HUMAN Zinc finger protein 667 OS=Homo sapiens (Human) OX=9606 GN=ZNF667 PE=2 SV=2	22	40	28	12	37	32	39	35	40	32	45	79	7	25	23	60	22	3	12	17	0	20	610
sp|Q8WWR8|NEUR4_HUMAN Sialidase-4 OS=Homo sapiens (Human) OX=9606 GN=NEU4 PE=1 SV=3	43	41	7	20	13	14	22	57	12	9	46	3	4	17	56	41	24	11	10	34	0	20	484
sp|P62714|PP2AB_HUMAN Serine/threonine-protein phosphatase 2A catalytic subunit beta isoform OS=Homo sapiens (Human) OX=9606 GN=PPP2CB PE=1 SV=1	13	20	14	25	10	14	19	23	10	12	31	11	6	14	14	12	19	5	16	21	0	20	309
sp|Q02383|SEMG2_HUMAN Semenogelin-2 OS=Homo sapiens (Human) OX=9606 GN=SEMG2 PE=1 SV=1	14	18	28	24	2	76	42	49	41	30	31	58	4	7	12	77	27	3	15	24	0	20	582
sp|Q76N89|HECW1_HUMAN E3 ubiquitin-protein ligase HECW1 OS=Homo sapiens (Human) OX=9606 GN=HECW1 PE=1 SV=3	104	111	60	80	24	75	147	112	50	68	141	54	24	66	95	176	76	16	50	77	0	20	1606
sp|Q9NQX4|MYO5C_HUMAN Unconventional myosin-Vc OS=Homo sapiens (Human) OX=9606 GN=MYO5C PE=1 SV=2	98	100	85	80	23	116	164	64	42	105	186	146	49	77	44	114	78	13	61	97	0	20	1742
sp|Q9Y2K3|MYH15_HUMAN Myosin-15 OS=Homo sapiens (Human) OX=9606 GN=MYH15 PE=1 SV=5	153	112	87	80	25	138	256	73	35	87	240	184	48	67	26	111	87	16	33	88	0	20	1946
sp|O43639|NCK2_HUMAN Cytoplasmic protein NCK2 OS=Homo sapiens (Human) OX=9606 GN=NCK2 PE=1 SV=2	26	23	19	20	4	12	32	27	8	11	30	27	4	12	17	34	17	10	16	31	0	20	380
sp|Q6NXP0|EFC12_HUMAN EF-hand calcium-binding domain-containing protein 12 OS=Homo sapiens (Human) OX=9606 GN=EFCAB12 PE=1 SV=1	31	39	16	27	9	39	35	18	23	27	57	48	15	18	45	38	30	8	21	28	0	20	572
sp|Q9H6B4|CLMP_HUMAN CXADR-like membrane protein OS=Homo sapiens (Human) OX=9606 GN=CLMP PE=1 SV=1	23	25	12	11	6	15	33	25	8	14	40	21	4	4	19	41	25	4	14	29	0	20	373
sp|Q15038|DAZP2_HUMAN DAZ-associated protein 2 OS=Homo sapiens (Human) OX=9606 GN=DAZAP2 PE=1 SV=1	20	3	6	3	1	9	2	21	2	4	9	2	6	5	30	9	11	1	12	12	0	20	168
sp|Q2M218|ZN630_HUMAN Zinc finger protein 630 OS=Homo sapiens (Human) OX=9606 GN=ZNF630 PE=2 SV=1	19	38	14	19	37	41	51	42	41	37	37	62	11	31	33	49	41	5	25	24	0	20	657
sp|Q8NHY6|ZFP28_HUMAN Zinc finger protein 28 homolog OS=Homo sapiens (Human) OX=9606 GN=ZFP28 PE=1 SV=1	47	58	28	27	38	46	60	61	48	30	58	81	6	35	45	72	55	12	25	36	0	20	868
sp|Q8IXB3|TARG1_HUMAN Trafficking regulator of GLUT4 1 OS=Homo sapiens (Human) OX=9606 GN=TRARG1 PE=2 SV=2	17	10	6	7	2	9	9	8	2	14	22	7	6	5	13	19	8	1	2	10	0	20	177
sp|P84243|H33_HUMAN Histone H3.3 OS=Homo sapiens (Human) OX=9606 GN=H3-3A PE=1 SV=2	18	18	1	4	1	8	7	8	2	8	12	13	2	4	6	6	10	0	3	5	0	19	136
tr|A0A499FJF3|A0A499FJF3_HUMAN Uncharacterized protein OS=Homo sapiens (Human) OX=9606 GN=ENSG00000282168 PE=1 SV=1	18	16	11	10	6	9	17	15	13	11	38	21	5	11	11	18	9	4	5	19	0	20	267
sp|P21741|MK_HUMAN Midkine OS=Homo sapiens (Human) OX=9606 GN=MDK PE=1 SV=1	14	8	3	5	10	6	6	17	1	2	9	23	1	4	6	4	12	4	2	6	0	20	143
sp|Q8TED0|UTP15_HUMAN U3 small nucleolar RNA-associated protein 15 homolog OS=Homo sapiens (Human) OX=9606 GN=UTP15 PE=1 SV=3	30	31	15	31	6	16	28	32	16	32	52	41	9	20	22	41	31	3	22	40	0	20	518
sp|Q7Z494|NPHP3_HUMAN Nephrocystin-3 OS=Homo sapiens (Human) OX=9606 GN=NPHP3 PE=1 SV=1	99	70	43	68	21	73	110	73	36	58	172	95	24	44	54	102	56	17	49	66	0	20	1330
sp|A8MUK1|U17L5_HUMAN Ubiquitin carboxyl-terminal hydrolase 17-like protein 5 OS=Homo sapiens (Human) OX=9606 GN=USP17L5 PE=3 SV=2	43	29	18	24	17	37	31	27	29	14	55	31	12	13	27	42	30	6	17	28	0	20	530
sp|A0FGR8|ESYT2_HUMAN Extended synaptotagmin-2 OS=Homo sapiens (Human) OX=9606 GN=ESYT2 PE=1 SV=1	55	68	34	47	9	41	54	70	23	47	115	52	13	31	61	76	40	12	14	59	0	20	921
sp|Q96BY7|ATG2B_HUMAN Autophagy-related protein 2 homolog B OS=Homo sapiens (Human) OX=9606 GN=ATG2B PE=1 SV=5	109	100	72	115	33	89	156	106	66	99	214	104	49	94	135	221	114	18	53	131	0	20	2078
sp|Q13509|TBB3_HUMAN Tubulin beta-3 chain OS=Homo sapiens (Human) OX=9606 GN=TUBB3 PE=1 SV=2	30	22	21	26	8	21	37	34	11	19	33	16	19	22	20	32	27	4	17	31	0	20	450
sp|Q1L6U9|MSMP_HUMAN Prostate-associated microseminoprotein OS=Homo sapiens (Human) OX=9606 GN=MSMP PE=1 SV=1	10	4	1	5	11	8	5	17	6	4	12	6	3	5	13	9	5	4	4	7	0	20	139
sp|Q9H6Y7|RN167_HUMAN E3 ubiquitin-protein ligase RNF167 OS=Homo sapiens (Human) OX=9606 GN=RNF167 PE=1 SV=1	31	18	12	19	9	17	20	24	10	15	37	10	5	13	36	20	15	4	9	26	0	20	350
sp|Q15078|CD5R1_HUMAN Cyclin-dependent kinase 5 activator 1 OS=Homo sapiens (Human) OX=9606 GN=CDK5R1 PE=1 SV=1	20	14	16	12	8	15	11	14	7	10	38	23	5	9	19	37	14	4	10	21	0	20	307
sp|O43747|AP1G1_HUMAN AP-1 complex subunit gamma-1 OS=Homo sapiens (Human) OX=9606 GN=AP1G1 PE=1 SV=5	60	43	43	40	15	38	49	39	15	53	99	41	28	23	42	60	56	3	21	54	0	20	822
sp|Q9BTE0|NAT9_HUMAN N-acetyltransferase 9 OS=Homo sapiens (Human) OX=9606 GN=NAT9 PE=1 SV=1	12	7	4	7	5	13	26	12	5	5	25	10	7	6	8	15	16	4	5	15	0	20	207
sp|Q8NCG7|DGLB_HUMAN Sn1-specific diacylglycerol lipase beta OS=Homo sapiens (Human) OX=9606 GN=DAGLB PE=1 SV=2	59	34	15	39	21	24	25	48	21	39	81	20	15	22	33	59	26	12	24	55	0	20	672
sp|Q13562|NDF1_HUMAN Neurogenic differentiation factor 1 OS=Homo sapiens (Human) OX=9606 GN=NEUROD1 PE=1 SV=3	25	16	15	21	6	13	36	17	14	9	30	22	11	15	33	36	17	2	9	9	0	20	356
sp|P42263|GRIA3_HUMAN Glutamate receptor 3 OS=Homo sapiens (Human) OX=9606 GN=GRIA3 PE=1 SV=2	60	50	45	38	10	36	55	66	15	53	69	52	28	49	32	67	47	14	41	67	0	20	894
sp|Q587J7|TDR12_HUMAN Putative ATP-dependent RNA helicase TDRD12 OS=Homo sapiens (Human) OX=9606 GN=TDRD12 PE=2 SV=2	79	40	48	68	39	50	82	49	33	65	129	98	19	43	70	76	55	14	35	85	0	20	1177
sp|Q9NZQ0|DJC27_HUMAN DnaJ homolog subfamily C member 27 OS=Homo sapiens (Human) OX=9606 GN=DNAJC27 PE=1 SV=1	21	17	14	17	7	6	20	19	5	18	15	25	8	13	8	16	11	3	9	21	0	20	273
sp|Q9Y5H0|PCDG3_HUMAN Protocadherin gamma-A3 OS=Homo sapiens (Human) OX=9606 GN=PCDHGA3 PE=2 SV=2	72	43	52	61	7	37	56	69	15	48	109	36	8	29	55	83	54	5	25	68	0	20	932
sp|Q5VZ18|SHE_HUMAN SH2 domain-containing adapter protein E OS=Homo sapiens (Human) OX=9606 GN=SHE PE=1 SV=1	43	33	14	21	6	22	40	46	10	16	39	41	5	6	37	56	20	7	16	17	0	20	495
sp|Q9P055|JKAMP_HUMAN JNK1/MAPK8-associated membrane protein OS=Homo sapiens (Human) OX=9606 GN=JKAMP PE=2 SV=3	21	10	5	8	12	8	13	19	7	20	52	14	9	16	15	22	17	6	23	22	0	20	319
sp|Q6P1W5|CA094_HUMAN Uncharacterized protein C1orf94 OS=Homo sapiens (Human) OX=9606 GN=C1orf94 PE=1 SV=2	34	25	23	22	12	39	33	48	9	15	62	36	12	22	70	53	31	6	16	30	0	20	598
sp|Q14BN4|SLMAP_HUMAN Sarcolemmal membrane-associated protein OS=Homo sapiens (Human) OX=9606 GN=SLMAP PE=1 SV=1	57	47	32	42	15	70	107	20	20	33	107	72	12	16	19	64	45	6	10	34	0	20	828
sp|Q8WZ92|OR5P2_HUMAN Olfactory receptor 5P2 OS=Homo sapiens (Human) OX=9606 GN=OR5P2 PE=2 SV=1	19	9	14	10	10	6	6	12	9	29	42	9	10	22	9	35	24	0	16	31	0	19	322
sp|P62244|RS15A_HUMAN 40S ribosomal protein S15a OS=Homo sapiens (Human) OX=9606 GN=RPS15A PE=1 SV=2	6	11	7	6	2	4	6	11	4	11	12	11	5	8	3	5	5	1	1	11	0	20	130
sp|Q8WV15|T255B_HUMAN Transmembrane protein 255B OS=Homo sapiens (Human) OX=9606 GN=TMEM255B PE=2 SV=1	29	11	6	8	13	14	10	30	3	14	38	6	3	14	36	27	16	2	18	28	0	20	326
sp|Q6ZRG5|YQ015_HUMAN Putative uncharacterized protein FLJ43944 OS=Homo sapiens (Human) OX=9606 GN=- PE=5 SV=1	15	3	8	5	2	22	27	1	2	9	15	11	2	5	37	27	11	2	0	17	0	19	221
sp|P28676|GRAN_HUMAN Grancalcin OS=Homo sapiens (Human) OX=9606 GN=GCA PE=1 SV=2	17	10	7	15	4	12	9	24	4	10	16	7	9	13	8	14	14	2	12	10	0	20	217
sp|Q96SE7|ZN347_HUMAN Zinc finger protein 347 OS=Homo sapiens (Human) OX=9606 GN=ZNF347 PE=1 SV=2	33	41	50	12	44	50	59	63	58	31	51	82	8	31	31	62	56	6	34	37	0	20	839
sp|Q969U6|FBXW5_HUMAN F-box/WD repeat-containing protein 5 OS=Homo sapiens (Human) OX=9606 GN=FBXW5 PE=1 SV=1	44	42	19	39	11	24	29	30	19	24	59	14	10	27	32	47	27	11	17	41	0	20	566
sp|Q9BWT7|CAR10_HUMAN Caspase recruitment domain-containing protein 10 OS=Homo sapiens (Human) OX=9606 GN=CARD10 PE=1 SV=2	84	106	17	43	26	66	118	71	15	25	138	39	12	14	67	81	28	16	16	50	0	20	1032
sp|Q96PF2|TSSK2_HUMAN Testis-specific serine/threonine-protein kinase 2 OS=Homo sapiens (Human) OX=9606 GN=TSSK2 PE=1 SV=2	20	26	9	28	9	10	21	20	12	26	34	33	9	12	14	26	14	2	13	20	0	20	358
sp|P98194|AT2C1_HUMAN Calcium-transporting ATPase type 2C member 1 OS=Homo sapiens (Human) OX=9606 GN=ATP2C1 PE=1 SV=3	65	34	30	43	20	41	52	62	11	70	90	57	33	37	36	70	58	7	16	87	0	20	919
sp|Q92522|H1X_HUMAN Histone H1x OS=Homo sapiens (Human) OX=9606 GN=H1FX PE=1 SV=1	32	13	7	4	0	8	10	24	2	3	12	41	2	2	13	13	11	1	4	11	0	19	213
sp|Q9UJ83|HACL1_HUMAN 2-hydroxyacyl-CoA lyase 1 OS=Homo sapiens (Human) OX=9606 GN=HACL1 PE=1 SV=2	56	24	26	19	13	29	35	41	9	38	45	30	19	23	36	34	27	8	21	45	0	20	578
sp|Q5T754|LCE1F_HUMAN Late cornified envelope protein 1F OS=Homo sapiens (Human) OX=9606 GN=LCE1F PE=1 SV=1	1	6	0	1	24	9	0	20	5	0	1	6	1	0	16	24	2	0	0	2	0	14	118
sp|Q4AE62|GTDC1_HUMAN Glycosyltransferase-like domain-containing protein 1 OS=Homo sapiens (Human) OX=9606 GN=GTDC1 PE=2 SV=1	21	19	15	28	12	18	27	23	19	21	56	34	10	26	25	35	18	6	18	27	0	20	458
sp|P0DPI3|CENL2_HUMAN Centromere protein V-like protein 2 OS=Homo sapiens (Human) OX=9606 GN=CENPVL2 PE=3 SV=1	33	35	2	11	12	10	14	23	12	4	17	11	1	7	22	17	11	5	3	22	0	20	272
sp|Q9UBD9|CLCF1_HUMAN Cardiotrophin-like cytokine factor 1 OS=Homo sapiens (Human) OX=9606 GN=CLCF1 PE=1 SV=1	21	14	8	11	4	9	8	17	7	2	38	8	5	7	20	10	15	7	8	6	0	20	225
sp|Q9Y5J6|T10B_HUMAN Mitochondrial import inner membrane translocase subunit Tim10 B OS=Homo sapiens (Human) OX=9606 GN=TIMM10B PE=1 SV=1	13	9	3	3	4	11	7	4	5	2	12	1	4	2	5	7	1	0	3	7	0	19	103
sp|P23759|PAX7_HUMAN Paired box protein Pax-7 OS=Homo sapiens (Human) OX=9606 GN=PAX7 PE=1 SV=4	39	36	15	24	6	26	27	44	15	20	37	24	11	12	45	48	30	3	17	26	0	20	505
sp|Q8N4C8|MINK1_HUMAN Misshapen-like kinase 1 OS=Homo sapiens (Human) OX=9606 GN=MINK1 PE=1 SV=2	80	104	49	73	12	89	105	99	34	58	101	76	28	28	110	97	56	15	40	78	0	20	1332
sp|Q8IYF3|TEX11_HUMAN Testis-expressed protein 11 OS=Homo sapiens (Human) OX=9606 GN=TEX11 PE=1 SV=3	77	35	47	45	21	44	90	27	23	48	124	58	37	40	23	73	40	17	28	43	0	20	940
sp|P36382|CXA5_HUMAN Gap junction alpha-5 protein OS=Homo sapiens (Human) OX=9606 GN=GJA5 PE=1 SV=3	18	22	14	10	11	20	21	28	12	16	30	16	9	18	20	27	17	6	12	31	0	20	358
sp|Q14588|ZN234_HUMAN Zinc finger protein 234 OS=Homo sapiens (Human) OX=9606 GN=ZNF234 PE=2 SV=3	21	36	17	20	46	41	57	54	53	24	40	72	8	36	21	55	34	4	25	36	0	20	700
sp|Q9Y5K1|SPO11_HUMAN Meiotic recombination protein SPO11 OS=Homo sapiens (Human) OX=9606 GN=SPO11 PE=2 SV=1	24	23	17	25	8	11	16	19	7	32	43	27	13	16	18	36	23	5	10	23	0	20	396
sp|Q6ZT62|BGIN_HUMAN Bargin OS=Homo sapiens (Human) OX=9606 GN=BARGIN PE=1 SV=2	81	37	15	34	8	29	60	35	17	17	81	29	21	15	51	55	40	3	13	36	0	20	677
sp|Q9H0N0|RAB6C_HUMAN Ras-related protein Rab-6C OS=Homo sapiens (Human) OX=9606 GN=RAB6C PE=1 SV=2	14	18	10	17	4	11	13	18	0	16	22	13	5	12	10	25	18	3	8	17	0	19	254
sp|O00294|TULP1_HUMAN Tubby-related protein 1 OS=Homo sapiens (Human) OX=9606 GN=TULP1 PE=1 SV=3	49	53	18	30	4	16	57	38	4	13	40	53	7	16	51	33	23	3	10	24	0	20	542
sp|Q8WZ71|TM158_HUMAN Transmembrane protein 158 OS=Homo sapiens (Human) OX=9606 GN=TMEM158 PE=2 SV=2	67	19	6	5	8	8	12	26	4	8	35	2	4	9	33	15	15	6	1	17	0	20	300
sp|Q9H1B7|I2BPL_HUMAN Probable E3 ubiquitin-protein ligase IRF2BPL OS=Homo sapiens (Human) OX=9606 GN=IRF2BPL PE=1 SV=1	103	41	21	25	17	51	40	77	16	9	60	31	16	18	96	84	30	6	13	42	0	20	796
sp|Q7Z5L3|C1QL2_HUMAN Complement C1q-like protein 2 OS=Homo sapiens (Human) OX=9606 GN=C1QL2 PE=2 SV=2	26	9	9	17	4	9	10	48	6	7	22	12	7	9	32	17	13	1	12	17	0	20	287
sp|P07108|ACBP_HUMAN Acyl-CoA-binding protein OS=Homo sapiens (Human) OX=9606 GN=DBI PE=1 SV=2	8	2	3	5	0	2	11	6	2	4	5	13	4	3	2	3	5	2	4	3	0	19	87
sp|Q8NCM8|DYHC2_HUMAN Cytoplasmic dynein 2 heavy chain 1 OS=Homo sapiens (Human) OX=9606 GN=DYNC2H1 PE=1 SV=4	248	218	190	243	61	251	325	214	90	258	540	304	84	182	159	309	193	75	116	247	0	20	4307
sp|O15145|ARPC3_HUMAN Actin-related protein 2/3 complex subunit 3 OS=Homo sapiens (Human) OX=9606 GN=ARPC3 PE=1 SV=3	10	7	10	9	4	10	12	9	1	11	15	18	6	9	13	9	9	2	9	5	0	20	178
sp|Q8TC27|ADA32_HUMAN Disintegrin and metalloproteinase domain-containing protein 32 OS=Homo sapiens (Human) OX=9606 GN=ADAM32 PE=1 SV=2	37	31	39	42	43	41	51	48	10	52	61	47	15	30	35	82	39	7	34	43	0	20	787
sp|Q7Z6V5|ADAT2_HUMAN tRNA-specific adenosine deaminase 2 OS=Homo sapiens (Human) OX=9606 GN=ADAT2 PE=1 SV=1	21	8	11	3	9	7	21	11	3	5	10	15	9	4	11	10	8	2	5	18	0	20	191
sp|Q8N668|COMD1_HUMAN COMM domain-containing protein 1 OS=Homo sapiens (Human) OX=9606 GN=COMMD1 PE=1 SV=1	13	8	6	6	1	12	18	14	4	12	22	13	4	8	8	19	9	3	3	7	0	20	190
tr|A0A075B6W4|A0A075B6W4_HUMAN T cell receptor alpha joining 46 OS=Homo sapiens (Human) OX=9606 GN=TRAJ46 PE=4 SV=1	1	2	0	1	0	0	0	3	0	0	2	3	0	1	1	2	3	0	0	1	1	11	21
sp|P10153|RNAS2_HUMAN Non-secretory ribonuclease OS=Homo sapiens (Human) OX=9606 GN=RNASE2 PE=1 SV=2	7	8	17	4	9	14	2	4	6	8	14	5	5	6	13	8	13	2	4	12	0	20	161
sp|Q9H993|ARMT1_HUMAN Damage-control phosphatase ARMT1 OS=Homo sapiens (Human) OX=9606 GN=ARMT1 PE=1 SV=1	20	12	17	25	7	23	34	22	16	28	54	31	6	23	18	33	21	14	17	20	0	20	441
sp|O14786|NRP1_HUMAN Neuropilin-1 OS=Homo sapiens (Human) OX=9606 GN=NRP1 PE=1 SV=3	40	37	45	53	22	28	64	86	24	60	62	57	20	39	53	73	51	18	38	53	0	20	923
sp|Q13360|ZN177_HUMAN Zinc finger protein 177 OS=Homo sapiens (Human) OX=9606 GN=ZNF177 PE=1 SV=4	15	21	19	18	28	24	40	32	28	17	29	47	7	19	16	46	37	4	16	18	0	20	481
sp|O00410|IPO5_HUMAN Importin-5 OS=Homo sapiens (Human) OX=9606 GN=IPO5 PE=1 SV=4	97	35	48	68	26	70	89	48	29	60	129	59	42	42	46	56	39	13	27	74	0	20	1097
sp|A6NNC1|P12LL_HUMAN Putative POM121-like protein 1-like OS=Homo sapiens (Human) OX=9606 GN=- PE=5 SV=3	105	79	21	40	14	40	27	62	26	14	70	28	8	19	93	144	63	3	9	32	0	20	897
sp|Q01064|PDE1B_HUMAN Calcium/calmodulin-dependent 3',5'-cyclic nucleotide phosphodiesterase 1B OS=Homo sapiens (Human) OX=9606 GN=PDE1B PE=1 SV=2	37	28	21	32	9	27	47	14	17	29	56	30	14	25	25	42	32	8	10	33	0	20	536
sp|P0CF51|TRGC1_HUMAN T cell receptor gamma constant 1 OS=Homo sapiens (Human) OX=9606 GN=TRGC1 PE=1 SV=1	7	4	10	12	7	6	9	5	3	12	20	18	4	7	8	10	15	2	6	8	0	20	173
sp|Q6ZVL8|YP033_HUMAN Putative uncharacterized protein FLJ42384 OS=Homo sapiens (Human) OX=9606 GN=- PE=2 SV=1	9	14	3	5	6	3	8	11	5	5	14	4	2	7	13	9	8	3	5	6	0	20	140
sp|Q6IEG0|SNR48_HUMAN U11/U12 small nuclear ribonucleoprotein 48 kDa protein OS=Homo sapiens (Human) OX=9606 GN=SNRNP48 PE=1 SV=2	17	35	16	27	7	13	41	9	12	14	20	30	6	7	12	31	9	2	12	19	0	20	339
sp|P33316|DUT_HUMAN Deoxyuridine 5'-triphosphate nucleotidohydrolase, mitochondrial OS=Homo sapiens (Human) OX=9606 GN=DUT PE=1 SV=4	33	21	4	9	5	8	14	32	4	11	18	11	4	8	21	17	10	1	8	13	0	20	252
sp|Q9HD90|NDF4_HUMAN Neurogenic differentiation factor 4 OS=Homo sapiens (Human) OX=9606 GN=NEUROD4 PE=1 SV=2	10	16	11	13	5	11	31	25	13	8	32	24	11	10	27	38	19	2	11	14	0	20	331
sp|Q9UL41|PNMA3_HUMAN Paraneoplastic antigen Ma3 OS=Homo sapiens (Human) OX=9606 GN=PNMA3 PE=2 SV=3	35	51	18	15	11	22	41	36	8	15	53	23	9	12	26	26	17	9	6	30	0	20	463
sp|Q9UKZ4|TEN1_HUMAN Teneurin-1 OS=Homo sapiens (Human) OX=9606 GN=TENM1 PE=1 SV=2	120	145	137	153	85	127	146	217	86	160	232	105	51	98	136	217	189	38	113	170	0	20	2725
sp|Q8N9L7|YV006_HUMAN Putative uncharacterized protein FLJ36925 OS=Homo sapiens (Human) OX=9606 GN=- PE=5 SV=1	5	10	5	1	4	8	7	11	5	6	7	6	5	2	6	13	9	3	3	4	0	20	120
sp|O43315|AQP9_HUMAN Aquaporin-9 OS=Homo sapiens (Human) OX=9606 GN=AQP9 PE=2 SV=2	33	9	9	6	4	6	13	34	4	25	32	11	9	21	14	18	9	4	8	26	0	20	295
sp|Q5H913|AR13A_HUMAN ADP-ribosylation factor-like protein 13A OS=Homo sapiens (Human) OX=9606 GN=ARL13A PE=2 SV=2	12	20	14	12	13	10	20	12	6	18	37	26	8	5	12	26	18	3	6	12	0	20	290
sp|A4FU01|MTMRB_HUMAN Myotubularin-related protein 11 OS=Homo sapiens (Human) OX=9606 GN=MTMR11 PE=2 SV=2	46	57	19	33	12	43	42	56	15	22	91	15	9	28	58	62	27	24	12	38	0	20	709
sp|Q9BW66|CINP_HUMAN Cyclin-dependent kinase 2-interacting protein OS=Homo sapiens (Human) OX=9606 GN=CINP PE=1 SV=1	12	7	10	9	3	3	24	7	9	7	33	20	5	3	8	16	17	4	7	8	0	20	212
sp|C9JSJ3|BHMG1_HUMAN Basic helix-loop-helix and HMG box domain-containing protein 1 OS=Homo sapiens (Human) OX=9606 GN=BHMG1 PE=3 SV=2	43	35	16	32	16	39	39	38	15	14	65	53	8	13	61	77	35	10	10	19	0	20	638
sp|O14775|GNB5_HUMAN Guanine nucleotide-binding protein subunit beta-5 OS=Homo sapiens (Human) OX=9606 GN=GNB5 PE=1 SV=2	33	18	14	27	19	12	21	28	11	11	32	24	11	17	7	40	23	8	10	29	0	20	395
sp|Q16270|IBP7_HUMAN Insulin-like growth factor-binding protein 7 OS=Homo sapiens (Human) OX=9606 GN=IGFBP7 PE=1 SV=1	25	16	4	8	18	9	19	39	4	9	25	15	3	0	23	24	13	3	6	19	0	19	282
sp|Q5VZ66|JKIP3_HUMAN Janus kinase and microtubule-interacting protein 3 OS=Homo sapiens (Human) OX=9606 GN=JAKMIP3 PE=2 SV=2	72	72	18	44	3	71	126	25	15	35	109	76	17	20	14	38	27	4	12	46	0	20	844
sp|Q9HC07|TM165_HUMAN Transmembrane protein 165 OS=Homo sapiens (Human) OX=9606 GN=TMEM165 PE=1 SV=1	39	15	6	10	3	13	18	26	5	21	35	12	8	18	22	14	23	3	6	27	0	20	324
sp|Q9Y274|SIA10_HUMAN Type 2 lactosamine alpha-2,3-sialyltransferase OS=Homo sapiens (Human) OX=9606 GN=ST3GAL6 PE=1 SV=1	20	14	20	16	7	7	13	16	12	23	39	25	7	23	19	14	16	4	17	19	0	20	331
sp|Q86U02|CN165_HUMAN Putative uncharacterized protein encoded by LINC00596 OS=Homo sapiens (Human) OX=9606 GN=LINC00596 PE=5 SV=1	4	4	5	4	5	2	4	7	4	2	13	2	4	13	9	13	6	5	5	6	0	20	117
sp|O75368|SH3L1_HUMAN SH3 domain-binding glutamic acid-rich-like protein OS=Homo sapiens (Human) OX=9606 GN=SH3BGRL PE=1 SV=1	14	6	8	4	0	7	12	7	0	6	5	8	2	6	7	7	3	1	5	6	0	18	114
sp|Q8N3X6|LCORL_HUMAN Ligand-dependent nuclear receptor corepressor-like protein OS=Homo sapiens (Human) OX=9606 GN=LCORL PE=1 SV=4	41	33	26	33	15	35	47	34	10	23	59	51	15	12	27	66	31	3	16	25	0	20	602
sp|Q9UMN6|KMT2B_HUMAN Histone-lysine N-methyltransferase 2B OS=Homo sapiens (Human) OX=9606 GN=KMT2B PE=1 SV=1	208	232	38	119	76	111	201	255	61	58	215	116	37	68	387	206	108	28	36	155	0	20	2715
sp|P48645|NMU_HUMAN Neuromedin-U OS=Homo sapiens (Human) OX=9606 GN=NMU PE=1 SV=1	12	14	5	6	5	14	10	9	4	5	24	7	5	10	13	16	4	2	2	7	0	20	174
sp|Q8TC59|PIWL2_HUMAN Piwi-like protein 2 OS=Homo sapiens (Human) OX=9606 GN=PIWIL2 PE=1 SV=1	48	56	34	44	23	51	49	62	30	54	101	63	33	33	67	62	48	14	26	75	0	20	973
sp|A6NHQ4|EPOP_HUMAN Elongin BC and Polycomb repressive complex 2-associated protein OS=Homo sapiens (Human) OX=9606 GN=EPOP PE=1 SV=1	51	34	4	11	11	9	19	38	5	2	30	11	3	11	81	27	16	6	1	9	0	20	379
sp|Q99879|H2B1M_HUMAN Histone H2B type 1-M OS=Homo sapiens (Human) OX=9606 GN=H2BC14 PE=1 SV=3	11	8	4	3	0	3	7	7	3	7	6	20	3	2	6	14	7	0	5	10	0	18	126
sp|Q0P670|SPEM2_HUMAN Uncharacterized protein SPEM2 OS=Homo sapiens (Human) OX=9606 GN=SPEM2 PE=2 SV=2	29	49	20	18	10	35	24	25	28	10	43	11	9	9	56	58	14	13	15	25	0	20	501
sp|Q8IWB9|TEX2_HUMAN Testis-expressed protein 2 OS=Homo sapiens (Human) OX=9606 GN=TEX2 PE=1 SV=2	53	46	25	55	11	35	109	63	28	45	111	93	23	34	87	142	59	11	31	66	0	20	1127
sp|Q5T8R8|CI066_HUMAN Uncharacterized protein C9orf66 OS=Homo sapiens (Human) OX=9606 GN=C9orf66 PE=2 SV=1	42	49	5	10	4	3	15	38	8	1	27	7	2	2	34	25	7	4	1	11	0	20	295
sp|Q9NVZ3|NECP2_HUMAN Adaptin ear-binding coat-associated protein 2 OS=Homo sapiens (Human) OX=9606 GN=NECAP2 PE=1 SV=1	23	14	8	14	2	18	12	30	2	11	15	14	3	12	25	18	15	6	5	16	0	20	263
sp|Q15047|SETB1_HUMAN Histone-lysine N-methyltransferase SETDB1 OS=Homo sapiens (Human) OX=9606 GN=SETDB1 PE=1 SV=1	74	71	44	89	36	51	93	96	20	50	94	92	27	43	85	125	72	13	43	73	0	20	1291
sp|Q9BZV3|IMPG2_HUMAN Interphotoreceptor matrix proteoglycan 2 OS=Homo sapiens (Human) OX=9606 GN=IMPG2 PE=1 SV=3	62	48	44	72	17	45	125	59	25	64	118	49	23	51	73	155	71	19	35	86	0	20	1241
sp|P51857|AK1D1_HUMAN Aldo-keto reductase family 1 member D1 OS=Homo sapiens (Human) OX=9606 GN=AKR1D1 PE=1 SV=1	19	18	18	16	6	10	25	17	10	23	31	23	6	12	20	18	13	5	14	22	0	20	326
sp|A0A1B0GX78|TVBL5_HUMAN T cell receptor beta variable 12-5 OS=Homo sapiens (Human) OX=9606 GN=TRBV12-5 PE=3 SV=1	9	9	2	6	5	6	7	6	2	3	14	3	7	4	7	5	9	1	3	7	0	20	115
sp|P08123|CO1A2_HUMAN Collagen alpha-2(I) chain OS=Homo sapiens (Human) OX=9606 GN=COL1A2 PE=1 SV=7	129	72	41	43	9	33	66	381	15	32	61	50	10	22	232	52	42	5	16	55	0	20	1366
sp|Q96AZ6|ISG20_HUMAN Interferon-stimulated gene 20 kDa protein OS=Homo sapiens (Human) OX=9606 GN=ISG20 PE=1 SV=2	13	19	2	11	3	6	11	13	8	7	23	7	6	3	5	14	8	1	5	16	0	20	181
sp|Q9HCJ5|ZSWM6_HUMAN Zinc finger SWIM domain-containing protein 6 OS=Homo sapiens (Human) OX=9606 GN=ZSWIM6 PE=1 SV=2	121	70	38	54	30	60	70	95	43	57	134	51	32	37	54	87	76	18	29	59	0	20	1215
sp|Q14145|KEAP1_HUMAN Kelch-like ECH-associated protein 1 OS=Homo sapiens (Human) OX=9606 GN=KEAP1 PE=1 SV=2	45	40	26	30	27	34	37	49	20	26	48	16	21	20	27	40	31	7	27	53	0	20	624
sp|Q9NX38|ABITM_HUMAN Protein Abitram OS=Homo sapiens (Human) OX=9606 GN=ABITRAM PE=1 SV=1	9	8	6	4	7	8	17	8	4	12	14	15	3	5	9	17	13	1	7	14	0	20	181
sp|Q9Y5B8|NDK7_HUMAN Nucleoside diphosphate kinase 7 OS=Homo sapiens (Human) OX=9606 GN=NME7 PE=1 SV=1	31	22	18	22	8	10	27	25	11	27	31	21	14	24	15	18	20	2	11	19	0	20	376
sp|Q6PEY2|TBA3E_HUMAN Tubulin alpha-3E chain OS=Homo sapiens (Human) OX=9606 GN=TUBA3E PE=1 SV=2	41	20	15	26	13	15	35	34	13	26	33	19	10	20	20	22	29	5	18	36	0	20	450
sp|Q53QV2|LBH_HUMAN Protein LBH OS=Homo sapiens (Human) OX=9606 GN=LBH PE=1 SV=1	2	5	3	8	4	5	16	4	1	5	7	6	5	4	10	7	4	1	3	5	0	20	105
sp|Q9BVA0|KTNB1_HUMAN Katanin p80 WD40 repeat-containing subunit B1 OS=Homo sapiens (Human) OX=9606 GN=KATNB1 PE=1 SV=1	48	43	24	40	17	24	36	34	14	30	62	34	11	17	47	62	34	11	11	56	0	20	655
sp|O95359|TACC2_HUMAN Transforming acidic coiled-coil-containing protein 2 OS=Homo sapiens (Human) OX=9606 GN=TACC2 PE=1 SV=3	319	116	50	165	42	161	291	241	53	60	210	157	39	51	360	302	156	14	23	138	0	20	2948
sp|O43920|NDUS5_HUMAN NADH dehydrogenase [ubiquinone] iron-sulfur protein 5 OS=Homo sapiens (Human) OX=9606 GN=NDUFS5 PE=1 SV=3	5	10	1	5	4	5	10	9	4	9	6	11	3	4	7	1	5	2	4	1	0	20	106
sp|Q8NFG4|FLCN_HUMAN Folliculin OS=Homo sapiens (Human) OX=9606 GN=FLCN PE=1 SV=1	39	30	17	23	17	26	49	37	20	22	56	28	15	25	32	58	26	10	9	40	0	20	579
sp|Q9H2U1|DHX36_HUMAN ATP-dependent DNA/RNA helicase DHX36 OS=Homo sapiens (Human) OX=9606 GN=DHX36 PE=1 SV=2	50	65	43	58	16	47	76	75	29	70	96	70	23	32	42	63	42	12	37	62	0	20	1008
sp|Q9P291|ARMX1_HUMAN Armadillo repeat-containing X-linked protein 1 OS=Homo sapiens (Human) OX=9606 GN=ARMCX1 PE=1 SV=1	39	23	29	18	10	10	28	41	7	26	44	39	6	17	16	33	26	4	8	29	0	20	453
sp|Q400G9|AMZ1_HUMAN Archaemetzincin-1 OS=Homo sapiens (Human) OX=9606 GN=AMZ1 PE=1 SV=1	50	36	4	27	20	22	35	31	12	9	67	15	6	22	38	46	19	10	7	22	0	20	498
sp|P52736|ZN133_HUMAN Zinc finger protein 133 OS=Homo sapiens (Human) OX=9606 GN=ZNF133 PE=1 SV=2	21	52	18	14	39	38	48	62	38	19	46	45	9	25	41	61	32	4	13	29	0	20	654
sp|Q01850|CDR2_HUMAN Cerebellar degeneration-related protein 2 OS=Homo sapiens (Human) OX=9606 GN=CDR2 PE=1 SV=2	29	19	11	19	6	40	61	14	12	12	54	35	9	9	18	39	25	2	13	27	0	20	454
sp|O95248|MTMR5_HUMAN Myotubularin-related protein 5 OS=Homo sapiens (Human) OX=9606 GN=SBF1 PE=1 SV=4	142	143	34	89	37	103	133	120	47	44	213	66	28	76	131	150	93	24	47	148	0	20	1868
sp|P80294|MT1H_HUMAN Metallothionein-1H OS=Homo sapiens (Human) OX=9606 GN=MT1H PE=1 SV=1	7	0	1	1	20	1	2	6	0	1	1	9	1	0	2	8	1	0	0	0	0	14	61
sp|O15016|TRI66_HUMAN Tripartite motif-containing protein 66 OS=Homo sapiens (Human) OX=9606 GN=TRIM66 PE=1 SV=4	69	51	39	30	45	107	90	55	44	39	115	59	31	35	130	130	55	10	16	66	0	20	1216
sp|P55774|CCL18_HUMAN C-C motif chemokine 18 OS=Homo sapiens (Human) OX=9606 GN=CCL18 PE=1 SV=1	7	2	3	3	7	6	2	4	0	5	11	9	2	1	5	5	5	2	3	7	0	19	89
sp|Q9Y5H9|PCDA2_HUMAN Protocadherin alpha-2 OS=Homo sapiens (Human) OX=9606 GN=PCDHA2 PE=1 SV=1	79	43	37	52	9	30	69	68	15	40	95	47	5	25	57	101	55	11	22	88	0	20	948
sp|Q3MUY2|PIGY_HUMAN Phosphatidylinositol N-acetylglucosaminyltransferase subunit Y OS=Homo sapiens (Human) OX=9606 GN=PIGY PE=1 SV=1	3	1	2	0	2	1	2	3	2	4	13	1	2	7	5	7	6	2	3	5	0	19	71
sp|A0A0B4J2D9|KVD13_HUMAN Immunoglobulin kappa variable 1D-13 OS=Homo sapiens (Human) OX=9606 GN=IGKV1D-13 PE=3 SV=1	10	5	1	5	3	9	2	9	0	5	15	3	2	4	8	18	7	2	5	4	0	19	117
sp|O95918|OR2H2_HUMAN Olfactory receptor 2H2 OS=Homo sapiens (Human) OX=9606 GN=OR2H2 PE=2 SV=2	17	13	9	8	10	11	10	15	6	17	48	9	5	20	17	27	23	4	11	32	0	20	312
sp|P02042|HBD_HUMAN Hemoglobin subunit delta OS=Homo sapiens (Human) OX=9606 GN=HBD PE=1 SV=2	15	4	8	7	2	5	7	13	7	0	18	11	3	8	6	6	5	2	3	17	0	19	147
sp|P48307|TFPI2_HUMAN Tissue factor pathway inhibitor 2 OS=Homo sapiens (Human) OX=9606 GN=TFPI2 PE=1 SV=1	18	19	13	13	18	6	13	15	1	7	19	18	4	15	12	12	11	2	13	6	0	20	235
sp|P22891|PROZ_HUMAN Vitamin K-dependent protein Z OS=Homo sapiens (Human) OX=9606 GN=PROZ PE=1 SV=2	19	22	15	16	23	16	33	33	14	11	41	15	7	11	19	25	26	9	12	33	0	20	400
sp|P22304|IDS_HUMAN Iduronate 2-sulfatase OS=Homo sapiens (Human) OX=9606 GN=IDS PE=1 SV=1	31	26	22	39	7	24	25	33	15	22	61	19	9	28	52	45	24	8	26	34	0	20	550
sp|A5PL33|KRBA1_HUMAN Protein KRBA1 OS=Homo sapiens (Human) OX=9606 GN=KRBA1 PE=1 SV=3	85	74	12	33	27	48	65	118	30	10	105	28	6	10	167	114	41	17	4	36	0	20	1030
sp|Q6PML9|ZNT9_HUMAN Zinc transporter 9 OS=Homo sapiens (Human) OX=9606 GN=SLC30A9 PE=1 SV=1	39	38	21	20	11	21	44	40	10	28	66	32	14	22	22	47	30	6	17	40	0	20	568
sp|Q8IZQ5|SELH_HUMAN Selenoprotein H OS=Homo sapiens (Human) OX=9606 GN=SELENOH PE=1 SV=2	14	11	3	1	1	2	15	9	1	2	11	12	2	2	10	6	5	1	2	11	1	20	122
sp|P47736|RPGP1_HUMAN Rap1 GTPase-activating protein 1 OS=Homo sapiens (Human) OX=9606 GN=RAP1GAP PE=1 SV=2	36	30	22	31	9	28	58	52	19	28	49	40	13	36	48	65	37	2	19	41	0	20	663
sp|Q14498|RBM39_HUMAN RNA-binding protein 39 OS=Homo sapiens (Human) OX=9606 GN=RBM39 PE=1 SV=2	48	58	17	26	5	21	36	34	9	27	37	36	15	21	23	56	22	2	10	27	0	20	530
sp|Q3LIE5|ADPRM_HUMAN Manganese-dependent ADP-ribose/CDP-alcohol diphosphatase OS=Homo sapiens (Human) OX=9606 GN=ADPRM PE=1 SV=1	16	14	20	24	7	15	23	19	17	12	29	15	9	22	18	24	11	5	17	25	0	20	342
sp|Q9ULV4|COR1C_HUMAN Coronin-1C OS=Homo sapiens (Human) OX=9606 GN=CORO1C PE=1 SV=1	31	25	23	34	12	14	29	28	12	39	34	36	12	15	25	31	23	8	11	32	0	20	474
sp|Q99590|SCAFB_HUMAN Protein SCAF11 OS=Homo sapiens (Human) OX=9606 GN=SCAF11 PE=1 SV=2	60	100	97	68	31	76	136	67	30	53	76	122	21	34	94	196	86	18	23	75	0	20	1463
sp|Q9P2Q2|FRM4A_HUMAN FERM domain-containing protein 4A OS=Homo sapiens (Human) OX=9606 GN=FRMD4A PE=1 SV=3	70	67	27	49	10	51	71	68	39	43	98	68	15	24	60	141	50	11	36	41	0	20	1039
sp|P51582|P2RY4_HUMAN P2Y purinoceptor 4 OS=Homo sapiens (Human) OX=9606 GN=P2RY4 PE=1 SV=1	27	26	8	13	16	6	9	19	9	10	59	6	4	20	22	30	24	8	17	32	0	20	365
sp|Q9H963|ZN702_HUMAN Putative zinc finger protein 702 OS=Homo sapiens (Human) OX=9606 GN=ZNF702P PE=5 SV=2	5	5	6	2	12	5	9	8	10	5	7	21	1	6	3	9	4	0	7	4	0	19	129
sp|Q14094|CCNI_HUMAN Cyclin-I OS=Homo sapiens (Human) OX=9606 GN=CCNI PE=1 SV=1	25	18	12	17	11	18	21	11	14	14	52	23	11	16	24	36	16	4	8	26	0	20	377
sp|Q3SY56|SP6_HUMAN Transcription factor Sp6 OS=Homo sapiens (Human) OX=9606 GN=SP6 PE=2 SV=1	36	17	4	17	13	16	21	46	26	1	36	18	5	8	40	32	16	6	6	12	0	20	376
sp|Q08708|CLM6_HUMAN CMRF35-like molecule 6 OS=Homo sapiens (Human) OX=9606 GN=CD300C PE=2 SV=1	11	16	8	7	4	6	11	15	5	4	26	8	4	7	22	25	16	8	3	18	0	20	224
sp|Q86UK0|ABCAC_HUMAN ATP-binding cassette sub-family A member 12 OS=Homo sapiens (Human) OX=9606 GN=ABCA12 PE=1 SV=3	132	102	136	113	41	102	136	135	56	177	318	152	70	139	112	233	162	29	98	152	0	20	2595
sp|Q9H208|O10A2_HUMAN Olfactory receptor 10A2 OS=Homo sapiens (Human) OX=9606 GN=OR10A2 PE=2 SV=2	23	9	14	5	11	5	6	10	5	21	45	12	11	25	18	26	23	2	12	20	0	20	303
sp|Q6NZI2|CAVN1_HUMAN Caveolae-associated protein 1 OS=Homo sapiens (Human) OX=9606 GN=CAVIN1 PE=1 SV=1	32	29	8	21	0	13	56	23	5	13	38	39	6	6	15	29	19	0	5	33	0	18	390
sp|Q1AE95|T183B_HUMAN Transmembrane protein 183B OS=Homo sapiens (Human) OX=9606 GN=TMEM183B PE=2 SV=1	26	32	11	20	11	13	22	19	12	17	33	23	10	15	25	26	17	7	10	27	0	20	376
sp|Q8N344|MIER2_HUMAN Mesoderm induction early response protein 2 OS=Homo sapiens (Human) OX=9606 GN=MIER2 PE=1 SV=2	41	30	17	42	14	21	57	36	14	11	52	19	8	17	46	51	20	4	13	32	0	20	545
sp|Q5T8I9|HENMT_HUMAN Small RNA 2'-O-methyltransferase OS=Homo sapiens (Human) OX=9606 GN=HENMT1 PE=1 SV=1	18	23	17	24	9	16	32	24	7	15	40	20	5	25	25	28	16	3	12	34	0	20	393
sp|P04075|ALDOA_HUMAN Fructose-bisphosphate aldolase A OS=Homo sapiens (Human) OX=9606 GN=ALDOA PE=1 SV=2	42	15	14	14	8	17	24	30	9	20	34	26	4	8	19	20	22	3	13	22	0	20	364
sp|Q8NGS4|O13F1_HUMAN Olfactory receptor 13F1 OS=Homo sapiens (Human) OX=9606 GN=OR13F1 PE=2 SV=1	22	9	13	6	11	6	6	11	7	29	48	11	20	19	13	31	17	3	12	25	0	20	319
sp|Q5T1J6|F182A_HUMAN Protein FAM182A OS=Homo sapiens (Human) OX=9606 GN=FAM182A PE=2 SV=1	8	6	4	5	5	8	12	12	9	6	11	9	5	4	11	15	5	6	0	13	0	19	154
sp|P07900|HS90A_HUMAN Heat shock protein HSP 90-alpha OS=Homo sapiens (Human) OX=9606 GN=HSP90AA1 PE=1 SV=5	34	30	31	54	7	25	97	32	12	50	62	80	20	25	21	42	43	4	25	38	0	20	732
sp|P0CJ77|HMN10_HUMAN Humanin-like 10 OS=Homo sapiens (Human) OX=9606 GN=MTRNR2L10 PE=2 SV=1	1	4	0	1	1	0	1	1	0	3	5	1	1	1	0	2	2	0	0	0	0	13	24
sp|Q2M3T9|HYAL4_HUMAN Hyaluronidase-4 OS=Homo sapiens (Human) OX=9606 GN=HYAL4 PE=1 SV=2	36	22	25	22	14	15	21	29	9	28	50	29	10	16	23	45	19	13	27	28	0	20	481
sp|Q2VYF4|LETM2_HUMAN LETM1 domain-containing protein LETM2, mitochondrial OS=Homo sapiens (Human) OX=9606 GN=LETM2 PE=2 SV=2	28	24	11	16	7	29	36	17	11	18	62	43	16	22	35	40	35	4	12	25	0	20	491
sp|Q8TES7|FBF1_HUMAN Fas-binding factor 1 OS=Homo sapiens (Human) OX=9606 GN=FBF1 PE=1 SV=2	120	96	10	50	7	98	119	64	29	20	125	67	22	18	74	111	55	6	8	34	0	20	1133
sp|Q9Y2T4|2ABG_HUMAN Serine/threonine-protein phosphatase 2A 55 kDa regulatory subunit B gamma isoform OS=Homo sapiens (Human) OX=9606 GN=PPP2R2C PE=1 SV=4	23	27	25	36	8	8	32	15	18	28	35	30	11	20	16	42	26	6	15	26	0	20	447
sp|Q66LE6|2ABD_HUMAN Serine/threonine-protein phosphatase 2A 55 kDa regulatory subunit B delta isoform OS=Homo sapiens (Human) OX=9606 GN=PPP2R2D PE=1 SV=1	26	32	25	35	10	10	33	21	15	30	30	27	10	24	16	44	20	7	14	24	0	20	453
sp|A0A087X1C5|CP2D7_HUMAN Putative cytochrome P450 2D7 OS=Homo sapiens (Human) OX=9606 GN=CYP2D7 PE=5 SV=1	42	41	11	23	9	23	28	36	16	16	66	15	11	31	40	25	25	7	6	44	0	20	515
sp|Q86XI2|CNDG2_HUMAN Condensin-2 complex subunit G2 OS=Homo sapiens (Human) OX=9606 GN=NCAPG2 PE=1 SV=1	64	63	36	51	30	45	100	44	35	77	145	78	29	44	43	84	47	15	29	84	0	20	1143
sp|O95867|LY66C_HUMAN Lymphocyte antigen 6 complex locus protein G6c OS=Homo sapiens (Human) OX=9606 GN=LY6G6C PE=1 SV=1	7	6	7	3	11	5	4	9	3	1	21	5	3	3	7	7	10	3	3	7	0	20	125
sp|O60449|LY75_HUMAN Lymphocyte antigen 75 OS=Homo sapiens (Human) OX=9606 GN=LY75 PE=1 SV=3	84	69	85	99	64	60	112	102	54	83	145	120	25	78	79	149	91	73	66	84	0	20	1722
sp|O95239|KIF4A_HUMAN Chromosome-associated kinesin KIF4A OS=Homo sapiens (Human) OX=9606 GN=KIF4A PE=1 SV=3	75	65	52	60	28	98	141	51	15	50	136	124	25	27	42	90	62	5	17	69	0	20	1232
sp|Q9BZY9|TRI31_HUMAN E3 ubiquitin-protein ligase TRIM31 OS=Homo sapiens (Human) OX=9606 GN=TRIM31 PE=1 SV=2	23	17	18	18	15	30	37	19	16	17	41	39	6	21	16	38	20	4	5	25	0	20	425
sp|Q9P0U1|TOM7_HUMAN Mitochondrial import receptor subunit TOM7 homolog OS=Homo sapiens (Human) OX=9606 GN=TOMM7 PE=1 SV=1	3	3	0	1	0	4	2	6	0	3	8	5	2	4	4	3	1	2	1	3	0	17	55
sp|Q5JTY5|CBWD3_HUMAN COBW domain-containing protein 3 OS=Homo sapiens (Human) OX=9606 GN=CBWD3 PE=2 SV=1	18	13	17	27	6	18	40	27	9	29	49	28	5	7	12	22	28	5	6	29	0	20	395
sp|Q96FX8|PERP_HUMAN p53 apoptosis effector related to PMP-22 OS=Homo sapiens (Human) OX=9606 GN=PERP PE=2 SV=1	22	7	4	4	11	7	6	18	2	17	25	3	4	14	6	12	7	7	10	7	0	20	193
sp|Q8IUH4|ZDH13_HUMAN Palmitoyltransferase ZDHHC13 OS=Homo sapiens (Human) OX=9606 GN=ZDHHC13 PE=1 SV=3	37	20	28	23	20	25	22	39	24	37	83	31	16	47	26	40	32	16	20	36	0	20	622
sp|P62330|ARF6_HUMAN ADP-ribosylation factor 6 OS=Homo sapiens (Human) OX=9606 GN=ARF6 PE=1 SV=2	8	12	8	13	2	7	8	14	3	14	17	13	5	5	5	6	13	4	7	11	0	20	175
sp|P02679|FIBG_HUMAN Fibrinogen gamma chain OS=Homo sapiens (Human) OX=9606 GN=FGG PE=1 SV=3	28	12	24	34	11	24	26	34	12	26	34	34	9	20	15	30	30	11	24	15	0	20	453
sp|Q8NH10|OR8U1_HUMAN Olfactory receptor 8U1 OS=Homo sapiens (Human) OX=9606 GN=OR8U1 PE=3 SV=1	20	7	13	10	11	9	6	10	8	28	43	11	17	25	10	26	19	1	16	19	0	20	309
sp|Q9NUC0|SRTD4_HUMAN SERTA domain-containing protein 4 OS=Homo sapiens (Human) OX=9606 GN=SERTAD4 PE=2 SV=1	25	16	21	15	13	11	26	24	8	17	23	22	7	15	26	44	11	4	14	14	0	20	356
sp|O95994|AGR2_HUMAN Anterior gradient protein 2 homolog OS=Homo sapiens (Human) OX=9606 GN=AGR2 PE=1 SV=1	13	7	5	11	1	7	10	5	4	7	26	18	4	4	10	10	14	2	8	9	0	20	175
sp|A6NGB7|TM221_HUMAN Transmembrane protein 221 OS=Homo sapiens (Human) OX=9606 GN=TMEM221 PE=4 SV=3	48	23	0	8	6	7	14	34	9	6	51	2	7	7	17	18	14	3	5	12	0	19	291
sp|P61960|UFM1_HUMAN Ubiquitin-fold modifier 1 OS=Homo sapiens (Human) OX=9606 GN=UFM1 PE=1 SV=1	8	4	3	3	1	1	4	5	1	7	6	6	1	5	7	8	7	0	1	7	0	19	85
sp|Q8N1M1|BEST3_HUMAN Bestrophin-3 OS=Homo sapiens (Human) OX=9606 GN=BEST3 PE=2 SV=1	31	40	19	37	7	20	37	35	17	30	72	26	19	37	44	71	46	15	26	39	0	20	668
sp|Q02878|RL6_HUMAN 60S ribosomal protein L6 OS=Homo sapiens (Human) OX=9606 GN=RPL6 PE=1 SV=3	16	22	6	9	1	9	13	20	8	16	24	52	4	7	18	14	16	0	10	23	0	19	288
sp|Q8TEE9|SAP25_HUMAN Histone deacetylase complex subunit SAP25 OS=Homo sapiens (Human) OX=9606 GN=SAP25 PE=1 SV=2	17	10	2	8	6	9	5	18	4	2	20	4	5	4	36	25	8	5	3	8	0	20	199
sp|Q8N9Y4|F181A_HUMAN Protein FAM181A OS=Homo sapiens (Human) OX=9606 GN=FAM181A PE=2 SV=3	25	28	8	11	9	16	21	33	8	4	38	25	6	8	45	30	6	4	9	20	0	20	354
sp|O60381|HBP1_HUMAN HMG box-containing protein 1 OS=Homo sapiens (Human) OX=9606 GN=HBP1 PE=1 SV=2	25	22	26	32	16	21	34	31	18	11	39	31	16	18	31	66	22	11	16	28	0	20	514
sp|Q9Y6N5|SQOR_HUMAN Sulfide:quinone oxidoreductase, mitochondrial OS=Homo sapiens (Human) OX=9606 GN=SQOR PE=1 SV=1	39	20	18	19	5	17	24	34	9	26	39	34	13	17	27	25	27	6	19	32	0	20	450
sp|Q6NXP2|F71F2_HUMAN Protein FAM71F2 OS=Homo sapiens (Human) OX=9606 GN=FAM71F2 PE=1 SV=3	13	13	16	9	4	13	21	15	9	18	38	13	4	11	28	28	20	6	6	24	0	20	309
sp|P80511|S10AC_HUMAN Protein S100-A12 OS=Homo sapiens (Human) OX=9606 GN=S100A12 PE=1 SV=2	7	1	4	6	0	6	9	4	6	8	10	10	1	5	0	3	5	0	2	5	0	17	92
sp|Q9ULV5|HSF4_HUMAN Heat shock factor protein 4 OS=Homo sapiens (Human) OX=9606 GN=HSF4 PE=1 SV=2	33	35	9	22	5	26	39	50	7	12	66	14	8	13	63	40	15	5	5	25	0	20	492
sp|A8MWE9|EFCB8_HUMAN EF-hand calcium-binding domain-containing protein 8 OS=Homo sapiens (Human) OX=9606 GN=EFCAB8 PE=4 SV=2	7	3	2	9	1	9	12	6	3	7	15	12	9	8	8	14	6	1	4	8	0	20	144
sp|P17987|TCPA_HUMAN T-complex protein 1 subunit alpha OS=Homo sapiens (Human) OX=9606 GN=TCP1 PE=1 SV=1	57	27	27	37	9	17	37	36	8	45	56	40	15	11	14	36	28	1	9	46	0	20	556
sp|Q9H0I9|TKTL2_HUMAN Transketolase-like protein 2 OS=Homo sapiens (Human) OX=9606 GN=TKTL2 PE=2 SV=1	68	30	23	34	14	24	36	47	19	44	44	28	14	25	27	43	40	5	14	47	0	20	626
sp|Q16849|PTPRN_HUMAN Receptor-type tyrosine-protein phosphatase-like N OS=Homo sapiens (Human) OX=9606 GN=PTPRN PE=1 SV=1	91	64	17	39	17	61	60	79	29	30	115	30	17	21	91	84	43	8	21	62	0	20	979
sp|Q9BTC8|MTA3_HUMAN Metastasis-associated protein MTA3 OS=Homo sapiens (Human) OX=9606 GN=MTA3 PE=1 SV=2	46	40	22	27	13	25	41	24	15	24	55	38	13	17	33	55	39	8	28	31	0	20	594
sp|Q9UMY1|NOL7_HUMAN Nucleolar protein 7 OS=Homo sapiens (Human) OX=9606 GN=NOL7 PE=1 SV=2	25	23	12	13	1	17	29	10	2	5	23	32	4	7	9	15	11	2	2	15	0	20	257
sp|Q07326|PIGF_HUMAN Phosphatidylinositol-glycan biosynthesis class F protein OS=Homo sapiens (Human) OX=9606 GN=PIGF PE=1 SV=1	9	6	10	3	9	3	6	10	4	18	35	9	2	16	10	20	16	9	7	17	0	20	219
sp|Q6ZTY9|CG065_HUMAN Uncharacterized protein C7orf65 OS=Homo sapiens (Human) OX=9606 GN=C7orf65 PE=2 SV=1	13	13	4	4	5	2	13	16	2	5	11	12	2	6	10	13	8	6	2	4	0	20	151
tr|A0A096LPG2|A0A096LPG2_HUMAN Uncharacterized protein OS=Homo sapiens (Human) OX=9606 GN=ENSG00000269167 PE=4 SV=1	0	2	0	1	3	0	1	1	1	0	4	0	0	1	3	3	1	2	0	0	0	12	23
sp|Q96F07|CYFP2_HUMAN Cytoplasmic FMR1-interacting protein 2 OS=Homo sapiens (Human) OX=9606 GN=CYFIP2 PE=1 SV=2	72	78	52	58	35	67	97	52	33	81	139	75	40	63	58	76	56	13	58	75	0	20	1278
sp|Q9UGP4|LIMD1_HUMAN LIM domain-containing protein 1 OS=Homo sapiens (Human) OX=9606 GN=LIMD1 PE=1 SV=1	43	33	16	36	30	30	36	73	22	10	66	30	11	19	66	74	23	6	17	35	0	20	676
sp|O60927|PP1RB_HUMAN E3 ubiquitin-protein ligase PPP1R11 OS=Homo sapiens (Human) OX=9606 GN=PPP1R11 PE=1 SV=1	5	11	2	4	5	3	16	10	5	2	4	8	3	1	14	9	16	1	1	6	0	20	126
sp|P60893|GPR85_HUMAN Probable G-protein coupled receptor 85 OS=Homo sapiens (Human) OX=9606 GN=GPR85 PE=1 SV=1	30	25	13	9	14	9	6	21	8	20	49	12	10	32	16	22	26	8	13	27	0	20	370
sp|Q7Z3F1|GP155_HUMAN Integral membrane protein GPR155 OS=Homo sapiens (Human) OX=9606 GN=GPR155 PE=2 SV=2	53	25	45	23	23	36	43	52	14	73	106	37	21	58	42	74	44	11	28	62	0	20	870
sp|P54652|HSP72_HUMAN Heat shock-related 70 kDa protein 2 OS=Homo sapiens (Human) OX=9606 GN=HSPA2 PE=1 SV=1	49	32	31	45	5	26	49	58	7	46	45	52	10	21	22	34	48	2	16	41	0	20	639
sp|Q9GZR5|ELOV4_HUMAN Elongation of very long chain fatty acids protein 4 OS=Homo sapiens (Human) OX=9606 GN=ELOVL4 PE=1 SV=1	18	9	16	8	3	11	10	20	8	21	33	22	12	22	11	20	15	16	19	20	0	20	314
sp|P06454|PTMA_HUMAN Prothymosin alpha OS=Homo sapiens (Human) OX=9606 GN=PTMA PE=1 SV=2	11	2	6	19	0	2	35	9	0	1	1	8	1	0	1	4	6	0	0	5	0	15	111
sp|Q93008|USP9X_HUMAN Probable ubiquitin carboxyl-terminal hydrolase FAF-X OS=Homo sapiens (Human) OX=9606 GN=USP9X PE=1 SV=3	161	133	134	158	60	138	180	131	71	137	287	133	60	101	137	175	102	37	85	150	0	20	2570
sp|A0A087WT03|TVAZ1_HUMAN T cell receptor alpha variable 26-1 OS=Homo sapiens (Human) OX=9606 GN=TRAV26-1 PE=3 SV=1	8	7	6	4	3	4	5	5	4	10	8	3	3	2	4	7	12	1	6	7	0	20	109
sp|Q13258|PD2R_HUMAN Prostaglandin D2 receptor OS=Homo sapiens (Human) OX=9606 GN=PTGDR PE=2 SV=2	29	28	10	8	14	8	13	21	7	11	59	8	13	25	18	33	14	4	12	24	0	20	359
sp|Q86XS5|ANGL5_HUMAN Angiopoietin-related protein 5 OS=Homo sapiens (Human) OX=9606 GN=ANGPTL5 PE=1 SV=3	13	17	26	28	14	14	20	27	11	19	33	26	13	19	11	33	21	7	13	23	0	20	388
sp|Q6JVE5|LCN12_HUMAN Epididymal-specific lipocalin-12 OS=Homo sapiens (Human) OX=9606 GN=LCN12 PE=2 SV=1	13	13	5	11	4	13	7	15	4	4	27	1	4	11	14	13	12	7	2	12	0	20	192
sp|Q9Y2H8|ZN510_HUMAN Zinc finger protein 510 OS=Homo sapiens (Human) OX=9606 GN=ZNF510 PE=2 SV=1	17	29	48	17	33	43	59	40	38	27	36	81	9	34	22	49	51	5	20	25	0	20	683
sp|Q9H582|ZN644_HUMAN Zinc finger protein 644 OS=Homo sapiens (Human) OX=9606 GN=ZNF644 PE=1 SV=2	64	56	74	74	33	58	100	60	55	46	105	130	27	49	58	144	83	6	31	74	0	20	1327
sp|Q9GZK7|O11A1_HUMAN Olfactory receptor 11A1 OS=Homo sapiens (Human) OX=9606 GN=OR11A1 PE=2 SV=1	24	13	6	8	9	9	9	15	7	23	45	6	11	25	13	19	22	1	15	35	0	20	315
sp|Q8TDM0|BCAS4_HUMAN Breast carcinoma-amplified sequence 4 OS=Homo sapiens (Human) OX=9606 GN=BCAS4 PE=1 SV=1	24	18	4	10	4	7	18	18	5	7	25	5	6	6	15	13	10	1	1	14	0	20	211
sp|Q96ST3|SIN3A_HUMAN Paired amphipathic helix protein Sin3a OS=Homo sapiens (Human) OX=9606 GN=SIN3A PE=1 SV=2	82	72	54	61	14	96	103	58	40	57	107	87	25	44	83	92	62	11	44	81	0	20	1273
sp|Q9HCX3|ZN304_HUMAN Zinc finger protein 304 OS=Homo sapiens (Human) OX=9606 GN=ZNF304 PE=1 SV=2	34	46	14	19	43	33	49	49	53	18	44	41	10	37	18	63	31	3	20	34	0	20	659
sp|Q7Z7M8|B3GN8_HUMAN UDP-GlcNAc:betaGal beta-1,3-N-acetylglucosaminyltransferase 8 OS=Homo sapiens (Human) OX=9606 GN=B3GNT8 PE=1 SV=1	43	28	5	17	10	16	14	32	5	7	60	8	2	18	42	29	19	12	12	18	0	20	397
sp|P26885|FKBP2_HUMAN Peptidyl-prolyl cis-trans isomerase FKBP2 OS=Homo sapiens (Human) OX=9606 GN=FKBP2 PE=1 SV=2	6	9	1	5	3	5	11	17	3	7	17	12	3	5	7	8	8	2	2	11	0	20	142
sp|Q96DN0|ERP27_HUMAN Endoplasmic reticulum resident protein 27 OS=Homo sapiens (Human) OX=9606 GN=ERP27 PE=1 SV=1	21	5	12	13	3	10	28	13	6	19	31	15	8	17	12	18	15	2	5	20	0	20	273
sp|Q9Y210|TRPC6_HUMAN Short transient receptor potential channel 6 OS=Homo sapiens (Human) OX=9606 GN=TRPC6 PE=1 SV=1	70	45	47	43	15	37	73	48	19	58	104	63	29	51	34	70	28	13	35	49	0	20	931
sp|Q9Y2D0|CAH5B_HUMAN Carbonic anhydrase 5B, mitochondrial OS=Homo sapiens (Human) OX=9606 GN=CA5B PE=1 SV=1	15	17	12	18	6	11	18	15	13	11	33	20	6	16	24	23	18	9	9	23	0	20	317
sp|Q8IWV2|CNTN4_HUMAN Contactin-4 OS=Homo sapiens (Human) OX=9606 GN=CNTN4 PE=1 SV=1	62	54	58	46	14	31	67	75	17	65	67	59	15	35	67	82	75	19	30	88	0	20	1026
tr|A0A286YF18|A0A286YF18_HUMAN Uncharacterized protein OS=Homo sapiens (Human) OX=9606 GN=ENSG00000284638 PE=4 SV=1	19	8	0	9	0	3	14	13	2	4	20	4	2	3	22	9	2	4	5	6	0	18	149
sp|Q9C0C6|CIPC_HUMAN CLOCK-interacting pacemaker OS=Homo sapiens (Human) OX=9606 GN=CIPC PE=1 SV=2	34	17	11	12	5	24	25	22	9	9	40	27	7	9	36	64	21	4	3	20	0	20	399
sp|Q96FK6|WDR89_HUMAN WD repeat-containing protein 89 OS=Homo sapiens (Human) OX=9606 GN=WDR89 PE=2 SV=1	18	16	24	30	12	12	20	28	13	21	32	24	8	12	8	34	25	7	12	31	0	20	387
sp|P14621|ACYP2_HUMAN Acylphosphatase-2 OS=Homo sapiens (Human) OX=9606 GN=ACYP2 PE=1 SV=2	2	6	5	4	1	4	6	8	0	4	3	9	3	4	2	14	7	2	4	11	0	19	99
sp|Q8N1D0|BWR1B_HUMAN Beckwith-Wiedemann syndrome chromosomal region 1 candidate gene B protein OS=Homo sapiens (Human) OX=9606 GN=SLC22A18AS PE=2 SV=3	24	22	5	5	7	9	15	33	4	3	27	10	6	9	25	21	9	7	1	11	0	20	253
sp|Q5VZT2|CJ113_HUMAN Putative uncharacterized protein C10orf113 OS=Homo sapiens (Human) OX=9606 GN=C10orf113 PE=2 SV=2	11	14	4	3	3	4	12	10	1	8	13	14	7	7	14	13	4	3	4	6	0	20	155
sp|O95995|DRC4_HUMAN Dynein regulatory complex subunit 4 OS=Homo sapiens (Human) OX=9606 GN=GAS8 PE=1 SV=1	32	37	20	23	2	31	68	15	13	17	55	55	15	10	9	12	22	2	10	30	0	20	478
sp|O60810|PRAM4_HUMAN PRAME family member 4 OS=Homo sapiens (Human) OX=9606 GN=PRAMEF4 PE=2 SV=5	21	32	19	23	25	21	26	14	8	21	86	28	16	20	25	27	22	9	11	24	0	20	478
sp|A6NHY6|CI118_HUMAN Putative uncharacterized protein C9orf118 OS=Homo sapiens (Human) OX=9606 GN=C9orf118 PE=4 SV=2	4	3	2	3	4	3	3	4	1	4	4	5	2	3	4	6	4	3	3	4	0	20	69
sp|Q9P241|AT10D_HUMAN Probable phospholipid-transporting ATPase VD OS=Homo sapiens (Human) OX=9606 GN=ATP10D PE=2 SV=3	94	72	53	62	34	62	90	79	30	80	160	76	38	67	71	121	71	18	48	100	0	20	1426
sp|P09913|IFIT2_HUMAN Interferon-induced protein with tetratricopeptide repeats 2 OS=Homo sapiens (Human) OX=9606 GN=IFIT2 PE=1 SV=1	39	24	27	22	12	23	53	22	14	17	55	46	11	16	13	26	8	6	19	19	0	20	472
sp|O75044|SRGP2_HUMAN SLIT-ROBO Rho GTPase-activating protein 2 OS=Homo sapiens (Human) OX=9606 GN=SRGAP2 PE=1 SV=3	65	60	43	66	21	66	85	40	30	53	91	79	28	35	54	109	57	3	24	62	0	20	1071
sp|Q16322|KCA10_HUMAN Potassium voltage-gated channel subfamily A member 10 OS=Homo sapiens (Human) OX=9606 GN=KCNA10 PE=1 SV=2	22	29	23	26	7	15	41	32	5	41	42	18	14	39	28	42	32	5	13	37	0	20	511
sp|Q9Y6U3|ADSV_HUMAN Adseverin OS=Homo sapiens (Human) OX=9606 GN=SCIN PE=1 SV=4	47	32	27	45	8	39	57	60	13	38	56	54	13	29	29	46	33	15	26	48	0	20	715
sp|Q8IV45|UN5CL_HUMAN UNC5C-like protein OS=Homo sapiens (Human) OX=9606 GN=UNC5CL PE=1 SV=2	36	33	16	17	22	34	35	35	20	14	70	11	11	19	39	38	23	10	8	27	0	20	518
sp|Q3KRA6|CB076_HUMAN UPF0538 protein C2orf76 OS=Homo sapiens (Human) OX=9606 GN=C2orf76 PE=1 SV=3	8	6	7	7	1	3	11	3	4	9	13	11	1	7	7	7	7	1	5	8	0	20	126
sp|Q07352|TISB_HUMAN mRNA decay activator protein ZFP36L1 OS=Homo sapiens (Human) OX=9606 GN=ZFP36L1 PE=1 SV=1	25	23	9	18	8	10	14	29	11	8	35	11	5	20	31	49	21	0	6	5	0	19	338
sp|Q75N90|FBN3_HUMAN Fibrillin-3 OS=Homo sapiens (Human) OX=9606 GN=FBN3 PE=2 SV=3	150	161	130	170	356	107	165	345	78	72	190	40	38	108	177	169	146	19	55	133	0	20	2809
sp|Q96HY7|DHTK1_HUMAN Probable 2-oxoglutarate dehydrogenase E1 component DHKTD1, mitochondrial OS=Homo sapiens (Human) OX=9606 GN=DHTKD1 PE=1 SV=2	61	50	28	39	13	50	63	71	38	41	98	42	27	44	55	61	44	10	26	58	0	20	919
sp|Q9BWG4|SSBP4_HUMAN Single-stranded DNA-binding protein 4 OS=Homo sapiens (Human) OX=9606 GN=SSBP4 PE=1 SV=1	39	14	12	10	3	13	14	58	9	7	19	7	26	11	62	43	12	5	11	10	0	20	385
sp|Q8IWZ5|TRI42_HUMAN Tripartite motif-containing protein 42 OS=Homo sapiens (Human) OX=9606 GN=TRIM42 PE=1 SV=2	37	38	42	33	52	32	42	25	27	41	54	48	17	30	33	64	38	9	26	35	0	20	723
sp|Q9ULW3|ABT1_HUMAN Activator of basal transcription 1 OS=Homo sapiens (Human) OX=9606 GN=ABT1 PE=1 SV=1	34	36	4	11	1	12	29	18	6	4	20	16	3	12	15	16	11	4	7	13	0	20	272
sp|Q9Y6B7|AP4B1_HUMAN AP-4 complex subunit beta-1 OS=Homo sapiens (Human) OX=9606 GN=AP4B1 PE=1 SV=2	49	39	25	36	24	38	55	37	16	35	100	36	20	23	37	46	30	8	23	62	0	20	739
sp|P0DJH9|RD3L_HUMAN Protein RD3-like OS=Homo sapiens (Human) OX=9606 GN=RD3L PE=4 SV=1	3	11	8	14	3	11	15	7	5	11	16	15	3	6	13	19	11	6	8	13	0	20	198
sp|Q96LC7|SIG10_HUMAN Sialic acid-binding Ig-like lectin 10 OS=Homo sapiens (Human) OX=9606 GN=SIGLEC10 PE=1 SV=3	45	43	23	20	16	44	38	49	16	16	74	23	9	25	65	77	41	13	16	44	0	20	697
sp|Q5VWK0|NBPF6_HUMAN Neuroblastoma breakpoint family member 6 OS=Homo sapiens (Human) OX=9606 GN=NBPF6 PE=2 SV=2	40	35	22	44	13	44	77	21	23	17	68	36	6	12	41	63	25	6	11	34	0	20	638
sp|Q92949|FOXJ1_HUMAN Forkhead box protein J1 OS=Homo sapiens (Human) OX=9606 GN=FOXJ1 PE=1 SV=3	49	17	8	24	7	17	30	36	13	12	43	17	3	15	49	29	22	10	7	13	0	20	421
sp|Q6K0P9|IFIX_HUMAN Pyrin and HIN domain-containing protein 1 OS=Homo sapiens (Human) OX=9606 GN=PYHIN1 PE=1 SV=1	30	25	25	14	5	19	35	19	13	33	34	55	14	17	37	50	38	0	9	20	0	19	492
sp|Q8NGC5|OR6J1_HUMAN Olfactory receptor 6J1 OS=Homo sapiens (Human) OX=9606 GN=OR6J1 PE=3 SV=1	15	17	11	9	16	6	8	16	4	29	51	9	8	23	16	33	27	3	13	33	0	20	347
sp|Q5TH74|STPG1_HUMAN O(6)-methylguanine-induced apoptosis 2 OS=Homo sapiens (Human) OX=9606 GN=STPG1 PE=1 SV=1	21	12	20	10	8	14	9	20	5	13	16	32	7	21	41	40	18	2	13	12	0	20	334
sp|Q12800|TFCP2_HUMAN Alpha-globin transcription factor CP2 OS=Homo sapiens (Human) OX=9606 GN=TFCP2 PE=1 SV=2	23	24	22	26	8	38	40	28	15	33	45	27	9	23	32	34	32	6	14	23	0	20	502
sp|Q5JTC6|AMER1_HUMAN APC membrane recruitment protein 1 OS=Homo sapiens (Human) OX=9606 GN=AMER1 PE=1 SV=2	96	64	26	59	20	50	130	89	28	13	83	47	28	33	114	120	55	9	32	39	0	20	1135
sp|Q8N300|SVBP_HUMAN Small vasohibin-binding protein OS=Homo sapiens (Human) OX=9606 GN=SVBP PE=1 SV=1	5	5	1	2	1	10	9	1	0	1	3	9	3	2	4	3	2	0	1	4	0	18	66
sp|P17027|ZNF23_HUMAN Zinc finger protein 23 OS=Homo sapiens (Human) OX=9606 GN=ZNF23 PE=1 SV=3	20	27	29	12	42	43	61	53	40	32	31	59	6	34	23	56	34	2	19	20	0	20	643
sp|Q96BK5|PINX1_HUMAN PIN2/TERF1-interacting telomerase inhibitor 1 OS=Homo sapiens (Human) OX=9606 GN=PINX1 PE=1 SV=2	25	18	13	21	3	20	29	20	7	8	18	51	6	8	15	25	21	5	3	12	0	20	328
sp|O94916|NFAT5_HUMAN Nuclear factor of activated T-cells 5 OS=Homo sapiens (Human) OX=9606 GN=NFAT5 PE=1 SV=1	85	31	94	45	17	214	77	83	27	58	103	50	55	49	114	216	111	2	15	85	0	20	1531
sp|Q9NPF2|CHSTB_HUMAN Carbohydrate sulfotransferase 11 OS=Homo sapiens (Human) OX=9606 GN=CHST11 PE=1 SV=1	15	25	18	14	9	15	24	10	13	15	35	23	13	17	16	21	22	2	21	24	0	20	352
sp|Q15526|SURF1_HUMAN Surfeit locus protein 1 OS=Homo sapiens (Human) OX=9606 GN=SURF1 PE=1 SV=1	28	26	9	9	3	11	19	24	5	11	29	11	7	10	22	17	18	8	7	26	0	20	300
sp|Q96RD2|O52B2_HUMAN Olfactory receptor 52B2 OS=Homo sapiens (Human) OX=9606 GN=OR52B2 PE=2 SV=3	26	13	9	7	11	5	5	13	15	34	39	6	11	23	19	17	19	5	10	36	0	20	323
sp|O14625|CXL11_HUMAN C-X-C motif chemokine 11 OS=Homo sapiens (Human) OX=9606 GN=CXCL11 PE=1 SV=1	8	5	5	2	5	3	4	6	0	10	6	13	4	3	4	4	2	0	1	9	0	18	94
sp|Q9C0B1|FTO_HUMAN Alpha-ketoglutarate-dependent dioxygenase FTO OS=Homo sapiens (Human) OX=9606 GN=FTO PE=1 SV=3	36	29	17	33	14	25	50	22	15	19	56	29	11	16	27	26	24	13	16	27	0	20	505
sp|P0CJ86|DU4L3_HUMAN Double homeobox protein 4-like protein 3 OS=Homo sapiens (Human) OX=9606 GN=DUX4L3 PE=3 SV=1	71	40	3	9	5	34	31	43	7	8	34	3	2	9	63	25	12	12	3	10	0	20	424
sp|P78316|NOP14_HUMAN Nucleolar protein 14 OS=Homo sapiens (Human) OX=9606 GN=NOP14 PE=1 SV=3	60	59	25	48	12	40	96	46	23	24	104	85	21	27	37	59	33	5	14	39	0	20	857
sp|Q6ZTB9|ZN833_HUMAN Putative zinc finger protein 833 OS=Homo sapiens (Human) OX=9606 GN=ZNF833P PE=5 SV=1	7	8	4	3	16	5	17	12	16	6	5	23	2	11	6	18	13	1	11	3	0	20	187
sp|O00253|AGRP_HUMAN Agouti-related protein OS=Homo sapiens (Human) OX=9606 GN=AGRP PE=1 SV=1	17	12	2	5	11	8	9	7	1	1	21	3	4	3	10	5	7	0	2	4	0	19	132
sp|P0CF74|IGLC6_HUMAN Immunoglobulin lambda constant 6 OS=Homo sapiens (Human) OX=9606 GN=IGLC6 PE=1 SV=1	11	1	4	2	3	5	7	5	2	1	6	8	0	2	9	15	10	2	4	9	0	19	106
sp|Q9Y6R0|NUMBL_HUMAN Numb-like protein OS=Homo sapiens (Human) OX=9606 GN=NUMBL PE=1 SV=1	84	41	8	21	13	45	36	45	10	9	35	28	9	23	82	42	30	7	5	36	0	20	609
sp|Q96QS3|ARX_HUMAN Homeobox protein ARX OS=Homo sapiens (Human) OX=9606 GN=ARX PE=1 SV=1	107	35	4	24	7	16	50	46	10	7	57	20	4	14	61	43	29	4	8	16	0	20	562
sp|Q15427|SF3B4_HUMAN Splicing factor 3B subunit 4 OS=Homo sapiens (Human) OX=9606 GN=SF3B4 PE=1 SV=1	33	17	14	16	1	14	12	55	21	14	26	13	19	14	96	22	10	1	11	15	0	20	424
sp|Q9Y6M1|IF2B2_HUMAN Insulin-like growth factor 2 mRNA-binding protein 2 OS=Homo sapiens (Human) OX=9606 GN=IGF2BP2 PE=1 SV=2	49	30	23	18	2	37	50	45	19	50	43	41	9	20	38	38	33	2	14	38	0	20	599
sp|Q96BR6|ZN669_HUMAN Zinc finger protein 669 OS=Homo sapiens (Human) OX=9606 GN=ZNF669 PE=2 SV=2	22	38	14	12	30	17	37	37	26	15	30	33	4	17	24	43	24	5	16	20	0	20	464
sp|Q6IC83|CV042_HUMAN Uncharacterized protein C22orf42 OS=Homo sapiens (Human) OX=9606 GN=C22orf42 PE=2 SV=1	16	10	5	16	9	5	25	14	9	11	29	16	10	2	14	27	13	4	3	13	0	20	251
sp|Q6UW49|SPESP_HUMAN Sperm equatorial segment protein 1 OS=Homo sapiens (Human) OX=9606 GN=SPESP1 PE=1 SV=2	20	11	18	14	3	8	35	12	8	19	31	29	6	6	29	35	28	3	11	24	0	20	350
sp|Q12962|TAF10_HUMAN Transcription initiation factor TFIID subunit 10 OS=Homo sapiens (Human) OX=9606 GN=TAF10 PE=1 SV=1	41	8	6	10	2	3	9	23	2	8	13	10	4	4	23	23	12	0	7	10	0	19	218
sp|P35442|TSP2_HUMAN Thrombospondin-2 OS=Homo sapiens (Human) OX=9606 GN=THBS2 PE=1 SV=2	51	57	68	121	68	59	59	105	31	41	67	44	12	40	68	75	69	26	32	79	0	20	1172
sp|P10082|PYY_HUMAN Peptide YY OS=Homo sapiens (Human) OX=9606 GN=PYY PE=1 SV=3	7	11	2	7	1	1	6	5	1	1	14	3	1	3	10	5	5	2	5	7	0	20	97
sp|Q8IYD9|LAS2_HUMAN Lung adenoma susceptibility protein 2 OS=Homo sapiens (Human) OX=9606 GN=LAS2 PE=1 SV=1	16	17	25	30	9	18	18	18	11	16	34	35	8	14	17	44	19	1	9	13	0	20	372
sp|Q8WY98|TM234_HUMAN Transmembrane protein 234 OS=Homo sapiens (Human) OX=9606 GN=TMEM234 PE=1 SV=1	16	5	3	2	4	12	7	15	2	8	30	7	4	4	5	11	13	3	3	10	0	20	164
sp|Q7L513|FCRLA_HUMAN Fc receptor-like A OS=Homo sapiens (Human) OX=9606 GN=FCRLA PE=1 SV=2	33	13	3	14	8	22	23	26	10	10	40	11	8	13	37	33	20	7	8	20	0	20	359
sp|Q14541|HNF4G_HUMAN Hepatocyte nuclear factor 4-gamma OS=Homo sapiens (Human) OX=9606 GN=HNF4G PE=1 SV=3	23	27	18	25	14	28	18	25	13	27	41	23	11	13	17	34	15	2	10	24	0	20	408
sp|Q29RF7|PDS5A_HUMAN Sister chromatid cohesion protein PDS5 homolog A OS=Homo sapiens (Human) OX=9606 GN=PDS5A PE=1 SV=1	104	66	68	79	27	62	94	47	32	76	157	113	36	46	68	89	59	8	26	80	0	20	1337
sp|P38117|ETFB_HUMAN Electron transfer flavoprotein subunit beta OS=Homo sapiens (Human) OX=9606 GN=ETFB PE=1 SV=3	24	15	4	16	4	9	22	17	2	14	27	25	5	3	13	6	15	1	2	31	0	20	255
sp|Q99614|TTC1_HUMAN Tetratricopeptide repeat protein 1 OS=Homo sapiens (Human) OX=9606 GN=TTC1 PE=1 SV=1	17	17	19	20	8	15	44	12	4	12	26	26	7	8	12	25	6	0	7	7	0	19	292
sp|Q99958|FOXC2_HUMAN Forkhead box protein C2 OS=Homo sapiens (Human) OX=9606 GN=FOXC2 PE=1 SV=1	66	22	19	14	6	24	25	41	24	11	36	22	12	11	61	43	18	3	25	18	0	20	501
sp|Q70CQ4|UBP31_HUMAN Ubiquitin carboxyl-terminal hydrolase 31 OS=Homo sapiens (Human) OX=9606 GN=USP31 PE=2 SV=2	96	90	30	60	31	69	67	90	38	28	110	79	20	39	113	207	75	13	26	71	0	20	1352
sp|P80192|M3K9_HUMAN Mitogen-activated protein kinase kinase kinase 9 OS=Homo sapiens (Human) OX=9606 GN=MAP3K9 PE=1 SV=3	76	77	34	50	18	40	102	76	21	42	114	53	17	34	106	109	56	19	13	47	0	20	1104
sp|Q96JP5|ZFP91_HUMAN E3 ubiquitin-protein ligase ZFP91 OS=Homo sapiens (Human) OX=9606 GN=ZFP91 PE=1 SV=1	44	47	10	28	15	24	67	38	18	20	37	47	8	8	45	51	25	2	11	25	0	20	570
sp|Q92886|NGN1_HUMAN Neurogenin-1 OS=Homo sapiens (Human) OX=9606 GN=NEUROG1 PE=1 SV=2	29	26	6	17	6	6	13	14	4	5	25	4	2	7	25	26	10	2	4	6	0	20	237
sp|Q9Y2B0|CNPY2_HUMAN Protein canopy homolog 2 OS=Homo sapiens (Human) OX=9606 GN=CNPY2 PE=1 SV=1	12	12	4	15	6	6	20	12	6	11	20	9	3	4	4	14	6	4	4	10	0	20	182
sp|Q9NXG6|P4HTM_HUMAN Transmembrane prolyl 4-hydroxylase OS=Homo sapiens (Human) OX=9606 GN=P4HTM PE=1 SV=2	38	39	15	32	8	28	35	39	20	16	54	12	13	14	28	26	25	9	17	34	0	20	502
sp|P20853|CP2A7_HUMAN Cytochrome P450 2A7 OS=Homo sapiens (Human) OX=9606 GN=CYP2A7 PE=2 SV=2	22	29	17	25	5	23	32	32	12	25	49	29	19	45	27	34	26	2	9	32	0	20	494
sp|Q8IZR5|CKLF4_HUMAN CKLF-like MARVEL transmembrane domain-containing protein 4 OS=Homo sapiens (Human) OX=9606 GN=CMTM4 PE=1 SV=1	24	16	10	8	5	9	11	13	3	15	26	4	5	14	8	22	15	3	6	17	0	20	234
sp|P78417|GSTO1_HUMAN Glutathione S-transferase omega-1 OS=Homo sapiens (Human) OX=9606 GN=GSTO1 PE=1 SV=2	13	9	10	9	5	6	24	15	2	12	27	23	7	13	16	17	9	5	9	10	0	20	241
tr|B3KNS4|B3KNS4_HUMAN Endogenous retrovirus group K3 member 1 OS=Homo sapiens (Human) OX=9606 GN=ERVK3-1 PE=1 SV=1	7	5	4	5	4	6	5	12	1	3	7	6	5	1	11	7	11	2	1	6	0	20	109
sp|O14709|ZN197_HUMAN Zinc finger protein 197 OS=Homo sapiens (Human) OX=9606 GN=ZNF197 PE=2 SV=1	36	59	42	32	54	54	94	63	61	46	83	102	13	38	40	78	50	12	30	42	0	20	1029
sp|P23497|SP100_HUMAN Nuclear autoantigen Sp-100 OS=Homo sapiens (Human) OX=9606 GN=SP100 PE=1 SV=3	44	60	45	52	20	36	98	44	21	32	53	99	16	33	53	79	38	7	12	37	0	20	879
sp|Q4ZJI4|SL9B1_HUMAN Sodium/hydrogen exchanger 9B1 OS=Homo sapiens (Human) OX=9606 GN=SLC9B1 PE=2 SV=2	39	14	17	10	10	15	23	38	11	46	72	22	16	27	27	37	34	8	8	41	0	20	515
sp|P50851|LRBA_HUMAN Lipopolysaccharide-responsive and beige-like anchor protein OS=Homo sapiens (Human) OX=9606 GN=LRBA PE=1 SV=4	191	132	135	155	47	131	195	160	69	160	299	136	71	117	128	258	167	34	73	205	0	20	2863
sp|Q9P2M1|LR2BP_HUMAN LRP2-binding protein OS=Homo sapiens (Human) OX=9606 GN=LRP2BP PE=1 SV=2	37	16	12	16	7	17	29	24	8	12	38	31	9	13	9	14	14	4	26	11	0	20	347
sp|Q9UKX2|MYH2_HUMAN Myosin-2 OS=Homo sapiens (Human) OX=9606 GN=MYH2 PE=1 SV=1	172	106	75	93	18	131	265	77	36	104	200	209	46	58	30	92	98	9	38	84	0	20	1941
sp|Q60I27|AL2CL_HUMAN ALS2 C-terminal-like protein OS=Homo sapiens (Human) OX=9606 GN=ALS2CL PE=1 SV=1	58	63	13	50	23	63	74	81	39	17	137	32	15	34	45	56	48	18	31	56	0	20	953
sp|Q8WTS1|ABHD5_HUMAN 1-acylglycerol-3-phosphate O-acyltransferase ABHD5 OS=Homo sapiens (Human) OX=9606 GN=ABHD5 PE=1 SV=1	23	19	14	18	8	8	23	29	9	20	34	18	7	16	24	23	17	9	11	19	0	20	349
sp|Q9BTV5|FSD1_HUMAN Fibronectin type III and SPRY domain-containing protein 1 OS=Homo sapiens (Human) OX=9606 GN=FSD1 PE=1 SV=1	42	29	17	27	8	27	36	26	9	13	50	32	16	23	22	36	31	7	11	34	0	20	496
sp|Q9UKB3|DJC12_HUMAN DnaJ homolog subfamily C member 12 OS=Homo sapiens (Human) OX=9606 GN=DNAJC12 PE=1 SV=1	11	13	9	12	3	9	27	4	6	4	16	19	6	6	8	17	10	5	5	8	0	20	198
sp|Q9Y2Q3|GSTK1_HUMAN Glutathione S-transferase kappa 1 OS=Homo sapiens (Human) OX=9606 GN=GSTK1 PE=1 SV=3	18	12	9	7	2	8	16	15	7	12	33	13	11	7	16	12	9	5	5	9	0	20	226
sp|A6NFU0|F187A_HUMAN Ig-like V-type domain-containing protein FAM187A OS=Homo sapiens (Human) OX=9606 GN=FAM187A PE=3 SV=1	25	30	6	20	18	19	20	27	17	17	37	14	7	25	22	24	23	9	18	35	0	20	413
sp|Q9UJ70|NAGK_HUMAN N-acetyl-D-glucosamine kinase OS=Homo sapiens (Human) OX=9606 GN=NAGK PE=1 SV=4	30	19	8	20	6	10	19	41	10	24	37	13	8	15	12	26	12	5	11	18	0	20	344
sp|Q86T82|UBP37_HUMAN Ubiquitin carboxyl-terminal hydrolase 37 OS=Homo sapiens (Human) OX=9606 GN=USP37 PE=1 SV=2	49	52	48	57	16	53	85	47	18	47	98	76	19	33	48	116	54	8	20	35	0	20	979
sp|O00391|QSOX1_HUMAN Sulfhydryl oxidase 1 OS=Homo sapiens (Human) OX=9606 GN=QSOX1 PE=1 SV=3	91	53	27	26	14	26	45	50	21	17	83	33	11	36	54	49	26	17	17	51	0	20	747
sp|Q8IXQ4|GPAM1_HUMAN GPALPP motifs-containing protein 1 OS=Homo sapiens (Human) OX=9606 GN=GPALPP1 PE=1 SV=1	20	25	10	42	0	12	30	22	4	12	17	37	7	12	29	35	14	2	4	6	0	19	340
sp|Q7Z2Z1|TICRR_HUMAN Treslin OS=Homo sapiens (Human) OX=9606 GN=TICRR PE=1 SV=2	123	132	34	89	35	89	138	99	47	53	187	127	34	49	172	239	120	24	22	97	0	20	1910
sp|Q9NZB2|F120A_HUMAN Constitutive coactivator of PPAR-gamma-like protein 1 OS=Homo sapiens (Human) OX=9606 GN=FAM120A PE=1 SV=2	103	65	40	43	21	53	56	98	37	38	97	56	24	40	101	92	41	13	35	65	0	20	1118
sp|Q96AX9|MIB2_HUMAN E3 ubiquitin-protein ligase MIB2 OS=Homo sapiens (Human) OX=9606 GN=MIB2 PE=1 SV=3	107	91	27	60	31	55	49	99	38	26	97	34	11	19	56	49	46	14	14	90	0	20	1013
sp|P06312|KV401_HUMAN Immunoglobulin kappa variable 4-1 OS=Homo sapiens (Human) OX=9606 GN=IGKV4-1 PE=1 SV=1	7	3	4	5	2	10	3	8	0	6	12	4	2	3	6	18	8	3	9	8	0	19	121
sp|Q8NDH3|PEPL1_HUMAN Probable aminopeptidase NPEPL1 OS=Homo sapiens (Human) OX=9606 GN=NPEPL1 PE=1 SV=3	61	29	19	29	16	12	25	47	18	21	56	20	7	18	29	29	31	6	8	42	0	20	523
sp|P04054|PA21B_HUMAN Phospholipase A2 OS=Homo sapiens (Human) OX=9606 GN=PLA2G1B PE=1 SV=3	12	3	9	10	14	4	4	8	3	6	12	14	2	5	6	13	7	1	9	6	0	20	148
sp|P50502|F10A1_HUMAN Hsc70-interacting protein OS=Homo sapiens (Human) OX=9606 GN=ST13 PE=1 SV=2	40	23	14	25	3	17	45	25	6	15	23	33	18	9	24	17	6	3	6	17	0	20	369
sp|Q8ND30|LIPB2_HUMAN Liprin-beta-2 OS=Homo sapiens (Human) OX=9606 GN=PPFIBP2 PE=1 SV=3	61	53	27	45	10	47	85	50	26	30	108	59	19	20	51	67	51	12	15	40	0	20	876
sp|O60486|PLXC1_HUMAN Plexin-C1 OS=Homo sapiens (Human) OX=9606 GN=PLXNC1 PE=1 SV=1	95	77	76	75	49	58	106	87	34	82	157	108	23	68	68	131	100	20	44	110	0	20	1568
sp|Q15622|OR7A5_HUMAN Olfactory receptor 7A5 OS=Homo sapiens (Human) OX=9606 GN=OR7A5 PE=2 SV=2	21	5	12	6	9	11	6	17	11	25	47	10	16	24	12	32	19	2	15	19	0	20	319
sp|Q9Y334|VWA7_HUMAN von Willebrand factor A domain-containing protein 7 OS=Homo sapiens (Human) OX=9606 GN=VWA7 PE=2 SV=4	78	54	17	44	6	45	43	76	30	23	120	11	10	43	88	71	56	13	6	57	0	20	891
sp|O60575|ISK4_HUMAN Serine protease inhibitor Kazal-type 4 OS=Homo sapiens (Human) OX=9606 GN=SPINK4 PE=3 SV=1	8	4	2	4	6	5	4	4	1	5	9	5	5	1	4	4	5	1	1	8	0	20	86
sp|P00450|CERU_HUMAN Ceruloplasmin OS=Homo sapiens (Human) OX=9606 GN=CP PE=1 SV=1	51	40	53	67	15	33	81	77	41	58	74	66	25	52	50	61	75	19	64	63	0	20	1065
sp|Q9Y2Q5|LTOR2_HUMAN Ragulator complex protein LAMTOR2 OS=Homo sapiens (Human) OX=9606 GN=LAMTOR2 PE=1 SV=1	18	5	9	5	2	7	6	9	0	4	17	5	5	3	2	6	8	1	5	8	0	19	125
sp|P48051|KCNJ6_HUMAN G protein-activated inward rectifier potassium channel 2 OS=Homo sapiens (Human) OX=9606 GN=KCNJ6 PE=1 SV=1	19	22	17	21	6	14	38	21	10	31	41	22	12	18	15	33	30	8	14	31	0	20	423
sp|P47887|OR1E2_HUMAN Olfactory receptor 1E2 OS=Homo sapiens (Human) OX=9606 GN=OR1E2 PE=2 SV=2	19	9	11	12	14	9	4	11	8	21	55	9	19	21	15	29	19	2	15	21	0	20	323
sp|P17661|DESM_HUMAN Desmin OS=Homo sapiens (Human) OX=9606 GN=DES PE=1 SV=3	44	43	20	23	1	32	57	21	6	18	49	22	10	12	10	36	25	1	14	26	0	20	470
sp|P08240|SRPRA_HUMAN Signal recognition particle receptor subunit alpha OS=Homo sapiens (Human) OX=9606 GN=SRPRA PE=1 SV=2	53	34	24	38	8	27	39	52	8	26	64	55	18	27	22	43	42	3	8	47	0	20	638
sp|Q6IEY1|OR4F3_HUMAN Olfactory receptor 4F3/4F16/4F29 OS=Homo sapiens (Human) OX=9606 GN=OR4F29 PE=2 SV=1	18	11	8	10	9	6	5	15	10	20	44	12	11	29	13	29	17	3	11	31	0	20	312
sp|Q9HBT6|CAD20_HUMAN Cadherin-20 OS=Homo sapiens (Human) OX=9606 GN=CDH20 PE=2 SV=2	56	39	32	65	6	36	50	53	13	48	62	25	23	34	48	62	55	10	28	56	0	20	801
sp|Q5XUX1|FBXW9_HUMAN F-box/WD repeat-containing protein 9 OS=Homo sapiens (Human) OX=9606 GN=FBXW9 PE=1 SV=2	38	39	12	37	12	19	22	31	17	15	61	11	5	8	28	47	24	13	11	38	0	20	488
sp|P03891|NU2M_HUMAN NADH-ubiquinone oxidoreductase chain 2 OS=Homo sapiens (Human) OX=9606 GN=MT-ND2 PE=1 SV=2	20	4	20	0	0	10	6	13	4	31	64	12	25	15	23	28	43	11	10	8	0	18	347
sp|P26599|PTBP1_HUMAN Polypyrimidine tract-binding protein 1 OS=Homo sapiens (Human) OX=9606 GN=PTBP1 PE=1 SV=1	52	18	37	25	3	29	17	38	15	29	53	33	12	24	28	47	23	0	10	38	0	19	531
sp|P09493|TPM1_HUMAN Tropomyosin alpha-1 chain OS=Homo sapiens (Human) OX=9606 GN=TPM1 PE=1 SV=2	36	15	5	24	1	14	56	3	2	12	33	38	6	1	0	15	8	0	6	9	0	18	284
sp|Q86YR5|GPSM1_HUMAN G-protein-signaling modulator 1 OS=Homo sapiens (Human) OX=9606 GN=GPSM1 PE=1 SV=2	77	57	19	43	11	41	49	56	20	15	71	25	10	21	40	43	27	4	21	25	0	20	675
sp|Q9H1U4|MEGF9_HUMAN Multiple epidermal growth factor-like domains protein 9 OS=Homo sapiens (Human) OX=9606 GN=MEGF9 PE=2 SV=3	52	18	34	18	42	20	31	48	11	23	39	19	4	13	60	58	61	4	16	31	0	20	602
sp|P30049|ATPD_HUMAN ATP synthase subunit delta, mitochondrial OS=Homo sapiens (Human) OX=9606 GN=ATP5F1D PE=1 SV=2	33	9	6	6	0	7	11	11	3	5	19	4	3	6	8	9	10	0	2	16	0	18	168
sp|P51522|ZNF83_HUMAN Zinc finger protein 83 OS=Homo sapiens (Human) OX=9606 GN=ZNF83 PE=2 SV=3	18	21	31	9	31	26	33	34	53	27	26	59	4	23	16	38	23	3	20	21	0	20	516
sp|A2NJV5|KV229_HUMAN Immunoglobulin kappa variable 2-29 OS=Homo sapiens (Human) OX=9606 GN=IGKV2-29 PE=3 SV=2	4	4	0	5	2	8	3	11	2	6	16	4	4	3	9	18	6	2	6	7	0	19	120
sp|P23083|HV102_HUMAN Immunoglobulin heavy variable 1-2 OS=Homo sapiens (Human) OX=9606 GN=IGHV1-2 PE=1 SV=2	12	6	3	4	2	7	3	11	2	3	6	5	5	3	3	10	10	6	7	9	0	20	117
tr|A0A126GWI2|A0A126GWI2_HUMAN Olfactory receptor OS=Homo sapiens (Human) OX=9606 GN=OR2A25 PE=3 SV=1	17	7	9	4	13	10	10	18	11	23	53	13	13	21	14	22	16	2	11	23	0	20	310
sp|A1L1A6|IGS23_HUMAN Immunoglobulin superfamily member 23 OS=Homo sapiens (Human) OX=9606 GN=IGSF23 PE=2 SV=2	15	8	4	6	5	9	9	15	0	15	21	7	9	5	21	15	13	3	2	10	0	19	192
sp|O14548|COX7R_HUMAN Cytochrome c oxidase subunit 7A-related protein, mitochondrial OS=Homo sapiens (Human) OX=9606 GN=COX7A2L PE=1 SV=2	11	2	2	4	1	6	3	8	0	4	10	11	4	5	9	7	10	1	9	7	0	19	114
sp|P59826|BPIB3_HUMAN BPI fold-containing family B member 3 OS=Homo sapiens (Human) OX=9606 GN=BPIFB3 PE=2 SV=2	32	11	17	13	4	13	23	42	11	19	94	21	7	15	31	36	26	3	4	54	0	20	476
sp|Q9HAJ7|SP30L_HUMAN Histone deacetylase complex subunit SAP30L OS=Homo sapiens (Human) OX=9606 GN=SAP30L PE=1 SV=1	11	15	9	12	4	10	12	11	5	8	12	18	2	8	9	15	7	0	6	9	0	19	183
sp|Q8WVN8|UB2Q2_HUMAN Ubiquitin-conjugating enzyme E2 Q2 OS=Homo sapiens (Human) OX=9606 GN=UBE2Q2 PE=1 SV=1	13	12	19	22	5	20	39	20	10	21	44	26	7	11	20	33	13	6	13	21	0	20	375
sp|Q15436|SC23A_HUMAN Protein transport protein Sec23A OS=Homo sapiens (Human) OX=9606 GN=SEC23A PE=1 SV=2	49	43	25	36	16	54	39	50	17	42	75	29	26	38	50	55	44	10	25	42	0	20	765
sp|P08235|MCR_HUMAN Mineralocorticoid receptor OS=Homo sapiens (Human) OX=9606 GN=NR3C2 PE=1 SV=2	46	37	52	34	27	48	55	65	20	41	73	52	25	34	75	149	49	6	31	65	0	20	984
sp|B7Z1M9|C2D4D_HUMAN C2 calcium-dependent domain-containing protein 4D OS=Homo sapiens (Human) OX=9606 GN=C2CD4D PE=2 SV=2	34	44	3	13	9	7	13	38	9	4	45	6	1	12	52	32	11	3	2	15	0	20	353
sp|Q16819|MEP1A_HUMAN Meprin A subunit alpha OS=Homo sapiens (Human) OX=9606 GN=MEP1A PE=1 SV=2	36	38	34	52	19	45	39	55	22	50	60	30	13	40	31	58	46	13	26	39	0	20	746
sp|P26378|ELAV4_HUMAN ELAV-like protein 4 OS=Homo sapiens (Human) OX=9606 GN=ELAVL4 PE=1 SV=3	20	20	29	15	5	19	15	32	4	23	30	22	12	16	24	36	26	3	12	22	0	20	385
sp|Q8IVV2|LOXH1_HUMAN Lipoxygenase homology domain-containing protein 1 OS=Homo sapiens (Human) OX=9606 GN=LOXHD1 PE=2 SV=4	92	130	106	163	37	44	153	177	31	121	174	138	39	101	53	107	142	48	73	138	0	20	2067
sp|A6NN14|ZN729_HUMAN Zinc finger protein 729 OS=Homo sapiens (Human) OX=9606 GN=ZNF729 PE=2 SV=4	59	47	34	17	86	24	110	70	96	65	60	221	14	65	43	82	79	9	38	33	0	20	1252
sp|Q6PCT2|FXL19_HUMAN F-box/LRR-repeat protein 19 OS=Homo sapiens (Human) OX=9606 GN=FBXL19 PE=1 SV=3	44	76	11	29	31	17	48	66	15	6	89	32	12	8	87	58	24	12	1	28	0	20	694
sp|A8MYX2|FM25E_HUMAN Protein FAM25E OS=Homo sapiens (Human) OX=9606 GN=FAM25E PE=2 SV=2	16	5	3	1	6	6	16	21	8	6	13	9	3	0	16	18	11	6	1	10	0	19	175
sp|Q8NGD2|OR4K2_HUMAN Olfactory receptor 4K2 OS=Homo sapiens (Human) OX=9606 GN=OR4K2 PE=2 SV=1	15	5	10	10	9	6	5	12	9	28	38	11	17	30	13	31	22	3	11	29	0	20	314
sp|Q9BY71|LRRC3_HUMAN Leucine-rich repeat-containing protein 3 OS=Homo sapiens (Human) OX=9606 GN=LRRC3 PE=1 SV=1	27	15	6	14	10	8	13	15	12	10	38	9	4	8	19	17	8	2	5	17	0	20	257
sp|Q8N6M3|FITM2_HUMAN Fat storage-inducing transmembrane protein 2 OS=Homo sapiens (Human) OX=9606 GN=FITM2 PE=1 SV=1	16	10	7	3	9	8	12	17	11	10	41	12	5	15	9	21	17	9	12	18	0	20	262
sp|Q5HYW2|NHSL2_HUMAN NHS-like protein 2 OS=Homo sapiens (Human) OX=9606 GN=NHSL2 PE=1 SV=2	84	87	34	51	11	56	91	64	28	32	107	56	15	29	128	175	90	9	17	61	0	20	1225
sp|Q86TI2|DPP9_HUMAN Dipeptidyl peptidase 9 OS=Homo sapiens (Human) OX=9606 GN=DPP9 PE=1 SV=3	50	42	27	38	14	38	67	60	35	35	77	44	16	47	55	63	39	16	39	61	0	20	863
sp|B3EWF7|EP2A2_HUMAN Laforin, isoform 9 OS=Homo sapiens (Human) OX=9606 GN=EPM2A PE=1 SV=1	54	48	6	6	10	8	7	50	7	1	28	3	1	10	54	19	13	2	2	15	0	20	344
sp|Q32MQ0|ZN750_HUMAN Zinc finger protein 750 OS=Homo sapiens (Human) OX=9606 GN=ZNF750 PE=1 SV=1	80	35	20	31	15	32	43	46	22	12	57	45	7	22	92	78	42	1	21	22	0	20	723
sp|P19532|TFE3_HUMAN Transcription factor E3 OS=Homo sapiens (Human) OX=9606 GN=TFE3 PE=1 SV=4	57	36	15	24	1	34	46	35	12	22	70	19	8	8	57	72	26	1	7	25	0	20	575
sp|Q9Y3Y2|CHTOP_HUMAN Chromatin target of PRMT1 protein OS=Homo sapiens (Human) OX=9606 GN=CHTOP PE=1 SV=2	23	38	10	6	0	18	5	47	1	8	27	12	11	2	11	10	10	0	2	7	0	18	248
sp|Q9C0A6|SETD5_HUMAN Histone-lysine N-methyltransferase SETD5 OS=Homo sapiens (Human) OX=9606 GN=SETD5 PE=1 SV=2	85	98	64	60	28	68	98	94	37	41	105	77	19	27	119	201	105	9	38	69	0	20	1442
sp|P10155|RO60_HUMAN 60 kDa SS-A/Ro ribonucleoprotein OS=Homo sapiens (Human) OX=9606 GN=RO60 PE=1 SV=2	42	25	18	25	13	19	42	31	13	29	59	46	22	19	17	28	35	8	12	35	0	20	538
sp|Q6W3E5|GDPD4_HUMAN Glycerophosphodiester phosphodiesterase domain-containing protein 4 OS=Homo sapiens (Human) OX=9606 GN=GDPD4 PE=2 SV=1	35	30	22	17	9	17	35	25	24	42	82	35	17	42	45	33	37	16	18	42	0	20	623
sp|Q13888|TF2H2_HUMAN General transcription factor IIH subunit 2 OS=Homo sapiens (Human) OX=9606 GN=GTF2H2 PE=1 SV=1	19	19	8	19	19	12	31	24	20	22	39	24	9	13	21	31	23	2	14	26	0	20	395
sp|Q9Y4K1|CRBG1_HUMAN Beta/gamma crystallin domain-containing protein 1 OS=Homo sapiens (Human) OX=9606 GN=CRYBG1 PE=1 SV=3	95	75	74	89	27	69	138	124	35	68	132	116	36	63	133	198	94	17	31	109	0	20	1723
sp|P09972|ALDOC_HUMAN Fructose-bisphosphate aldolase C OS=Homo sapiens (Human) OX=9606 GN=ALDOC PE=1 SV=2	43	20	14	18	7	15	25	31	7	20	31	21	4	9	19	19	18	3	13	27	0	20	364
sp|P09467|F16P1_HUMAN Fructose-1,6-bisphosphatase 1 OS=Homo sapiens (Human) OX=9606 GN=FBP1 PE=1 SV=5	30	13	13	24	7	7	17	27	5	17	30	27	11	11	16	20	17	0	15	31	0	19	338
sp|Q92536|YLAT2_HUMAN Y+L amino acid transporter 2 OS=Homo sapiens (Human) OX=9606 GN=SLC7A6 PE=1 SV=3	38	18	16	15	13	14	23	34	6	43	59	14	11	36	27	44	30	8	20	46	0	20	515
sp|Q14C86|GAPD1_HUMAN GTPase-activating protein and VPS9 domain-containing protein 1 OS=Homo sapiens (Human) OX=9606 GN=GAPVD1 PE=1 SV=2	105	92	56	105	26	73	115	69	29	64	159	72	35	46	81	148	75	11	32	85	0	20	1478
sp|Q9H7X0|NAA60_HUMAN N-alpha-acetyltransferase 60 OS=Homo sapiens (Human) OX=9606 GN=NAA60 PE=1 SV=1	13	10	8	14	5	5	9	14	13	20	25	13	3	9	9	25	14	4	15	14	0	20	242
sp|Q9Y471|CMAH_HUMAN Inactive cytidine monophosphate-N-acetylneuraminic acid hydroxylase OS=Homo sapiens (Human) OX=9606 GN=CMAHP PE=1 SV=4	17	25	31	33	7	15	33	30	15	31	53	32	13	27	38	21	23	15	18	24	0	20	501
sp|P57678|GEMI4_HUMAN Gem-associated protein 4 OS=Homo sapiens (Human) OX=9606 GN=GEMIN4 PE=1 SV=2	78	50	22	42	31	54	85	38	30	42	161	52	22	50	53	79	55	24	17	73	0	20	1058
sp|P35414|APJ_HUMAN Apelin receptor OS=Homo sapiens (Human) OX=9606 GN=APLNR PE=1 SV=1	27	20	10	15	14	8	14	26	6	15	41	10	14	24	14	34	27	9	20	32	0	20	380
sp|P55196|AFAD_HUMAN Afadin OS=Homo sapiens (Human) OX=9606 GN=AFDN PE=1 SV=3	126	141	62	119	18	109	162	91	40	69	158	117	44	47	135	146	95	15	49	81	0	20	1824
sp|Q15413|RYR3_HUMAN Ryanodine receptor 3 OS=Homo sapiens (Human) OX=9606 GN=RYR3 PE=1 SV=3	292	238	200	257	107	205	419	302	117	247	557	303	138	224	199	331	229	60	149	296	0	20	4870
sp|Q92736|RYR2_HUMAN Ryanodine receptor 2 OS=Homo sapiens (Human) OX=9606 GN=RYR2 PE=1 SV=3	304	256	192	282	90	199	410	305	145	236	555	317	158	227	189	353	222	57	165	305	0	20	4967
sp|Q96BQ5|CC127_HUMAN Coiled-coil domain-containing protein 127 OS=Homo sapiens (Human) OX=9606 GN=CCDC127 PE=1 SV=1	23	28	14	9	3	16	29	8	2	8	33	17	6	6	7	14	6	8	9	14	0	20	260
sp|Q86XU0|ZN677_HUMAN Zinc finger protein 677 OS=Homo sapiens (Human) OX=9606 GN=ZNF677 PE=2 SV=1	21	29	43	18	31	31	41	30	38	31	40	67	6	22	22	43	27	5	24	15	0	20	584
sp|Q9NTN3|S35D1_HUMAN UDP-glucuronic acid/UDP-N-acetylgalactosamine transporter OS=Homo sapiens (Human) OX=9606 GN=SLC35D1 PE=2 SV=1	32	10	14	11	4	9	14	27	2	22	46	22	11	27	8	21	27	4	15	29	0	20	355
sp|Q86TD4|SRCA_HUMAN Sarcalumenin OS=Homo sapiens (Human) OX=9606 GN=SRL PE=2 SV=2	81	36	26	51	6	47	136	95	15	34	78	42	14	28	71	68	42	5	19	38	0	20	932
sp|P00492|HPRT_HUMAN Hypoxanthine-guanine phosphoribosyltransferase OS=Homo sapiens (Human) OX=9606 GN=HPRT1 PE=1 SV=2	10	12	8	21	4	3	9	16	5	15	21	16	7	9	9	11	11	0	11	20	0	19	218
sp|Q9P1U1|ARP3B_HUMAN Actin-related protein 3B OS=Homo sapiens (Human) OX=9606 GN=ACTR3B PE=2 SV=1	24	27	10	25	9	16	32	29	9	34	25	21	10	22	27	19	18	5	18	38	0	20	418
sp|Q9UHR6|ZNHI2_HUMAN Zinc finger HIT domain-containing protein 2 OS=Homo sapiens (Human) OX=9606 GN=ZNHIT2 PE=1 SV=1	63	33	8	13	12	14	34	38	9	4	51	6	2	8	38	18	17	7	8	20	0	20	403
sp|Q6QHK4|FIGLA_HUMAN Factor in the germline alpha OS=Homo sapiens (Human) OX=9606 GN=FIGLA PE=1 SV=2	18	18	8	10	3	11	18	13	5	7	26	11	2	5	18	22	8	1	3	12	0	20	219
sp|B6SEH8|ERVV1_HUMAN Endogenous retrovirus group V member 1 Env polyprotein OS=Homo sapiens (Human) OX=9606 GN=ERVV-1 PE=2 SV=1	31	14	30	14	19	18	14	32	14	28	52	24	7	17	39	47	27	14	15	21	0	20	477
sp|Q5SV97|PERM1_HUMAN PGC-1 and ERR-induced regulator in muscle protein 1 OS=Homo sapiens (Human) OX=9606 GN=PERM1 PE=2 SV=4	98	50	5	38	8	39	46	72	11	11	47	19	12	19	118	89	43	7	4	54	0	20	790
sp|Q6UWS5|PT117_HUMAN Protein PET117 homolog, mitochondrial OS=Homo sapiens (Human) OX=9606 GN=PET117 PE=3 SV=1	5	8	1	3	0	8	7	5	1	6	11	7	2	0	0	6	3	1	0	7	0	16	81
sp|Q9Y6X8|ZHX2_HUMAN Zinc fingers and homeoboxes protein 2 OS=Homo sapiens (Human) OX=9606 GN=ZHX2 PE=1 SV=1	64	37	27	43	12	48	66	43	20	32	61	66	13	18	63	76	61	10	17	60	0	20	837
sp|P08173|ACM4_HUMAN Muscarinic acetylcholine receptor M4 OS=Homo sapiens (Human) OX=9606 GN=CHRM4 PE=1 SV=2	50	27	26	8	11	15	16	18	5	28	43	25	13	21	35	33	39	9	15	42	0	20	479
sp|P62166|NCS1_HUMAN Neuronal calcium sensor 1 OS=Homo sapiens (Human) OX=9606 GN=NCS1 PE=1 SV=2	10	7	8	16	1	10	17	12	0	9	15	17	5	15	7	9	11	2	7	12	0	19	190
sp|A6NGG3|CI092_HUMAN Putative uncharacterized protein C9orf92 OS=Homo sapiens (Human) OX=9606 GN=C9orf92 PE=4 SV=1	5	7	4	2	5	5	3	6	2	3	4	5	2	1	5	4	7	0	2	5	0	19	77
sp|Q9GZX3|CHST6_HUMAN Carbohydrate sulfotransferase 6 OS=Homo sapiens (Human) OX=9606 GN=CHST6 PE=1 SV=1	44	40	12	13	8	13	17	20	11	8	54	6	4	18	25	34	17	10	8	33	0	20	395
sp|Q7Z5L9|I2BP2_HUMAN Interferon regulatory factor 2-binding protein 2 OS=Homo sapiens (Human) OX=9606 GN=IRF2BP2 PE=1 SV=2	82	36	19	15	13	27	35	52	16	10	43	24	8	13	72	57	27	5	4	29	0	20	587
sp|Q66K66|TM198_HUMAN Transmembrane protein 198 OS=Homo sapiens (Human) OX=9606 GN=TMEM198 PE=1 SV=1	36	36	1	10	11	12	12	32	1	9	60	6	6	14	33	20	15	7	12	27	0	20	360
sp|P30838|AL3A1_HUMAN Aldehyde dehydrogenase, dimeric NADP-preferring OS=Homo sapiens (Human) OX=9606 GN=ALDH3A1 PE=1 SV=3	34	20	15	19	7	23	34	32	10	32	40	28	13	13	26	29	22	4	18	34	0	20	453
sp|Q8NGG5|OR8K1_HUMAN Olfactory receptor 8K1 OS=Homo sapiens (Human) OX=9606 GN=OR8K1 PE=2 SV=1	14	8	14	8	7	3	7	10	8	37	49	17	13	23	11	25	21	2	19	23	0	20	319
sp|O43264|ZW10_HUMAN Centromere/kinetochore protein zw10 homolog OS=Homo sapiens (Human) OX=9606 GN=ZW10 PE=1 SV=3	45	33	30	34	15	41	71	24	20	44	105	58	22	26	31	64	43	6	21	46	0	20	779
sp|Q8WVZ9|KBTB7_HUMAN Kelch repeat and BTB domain-containing protein 7 OS=Homo sapiens (Human) OX=9606 GN=KBTBD7 PE=1 SV=1	53	41	23	44	22	33	41	31	14	26	67	26	16	26	33	68	30	11	31	48	0	20	684
sp|Q96M34|TEX55_HUMAN Testis-specific expressed protein 55 OS=Homo sapiens (Human) OX=9606 GN=TEX55 PE=2 SV=2	41	41	20	40	2	55	43	25	19	18	27	23	9	10	31	59	33	0	15	25	0	19	536
sp|A0A087WX78|ELB3C_HUMAN Putative elongin-A3 member C OS=Homo sapiens (Human) OX=9606 GN=ELOA3C PE=5 SV=3	47	31	10	18	5	25	28	35	9	4	24	20	8	6	40	33	14	5	7	18	0	20	387
sp|P47211|GALR1_HUMAN Galanin receptor type 1 OS=Homo sapiens (Human) OX=9606 GN=GALR1 PE=1 SV=3	29	13	14	6	10	6	10	16	14	21	40	20	5	25	21	31	18	7	11	32	0	20	349
sp|P04424|ARLY_HUMAN Argininosuccinate lyase OS=Homo sapiens (Human) OX=9606 GN=ASL PE=1 SV=4	44	30	13	26	5	24	30	34	11	18	58	20	15	15	11	36	25	10	10	29	0	20	464
sp|Q16585|SGCB_HUMAN Beta-sarcoglycan OS=Homo sapiens (Human) OX=9606 GN=SGCB PE=1 SV=1	18	16	24	13	6	13	16	28	8	26	23	18	11	12	9	28	20	2	4	23	0	20	318
sp|Q8TDD1|DDX54_HUMAN ATP-dependent RNA helicase DDX54 OS=Homo sapiens (Human) OX=9606 GN=DDX54 PE=1 SV=2	78	91	13	47	5	57	63	73	14	31	88	69	16	32	44	55	39	3	15	48	0	20	881
sp|Q12766|HMGX3_HUMAN HMG domain-containing protein 3 OS=Homo sapiens (Human) OX=9606 GN=HMGXB3 PE=2 SV=2	110	101	46	50	43	73	113	94	29	52	149	74	19	33	130	152	95	12	40	123	0	20	1538
sp|A0A1B0GVD1|F237B_HUMAN Protein FAM237B OS=Homo sapiens (Human) OX=9606 GN=FAM237B PE=3 SV=1	6	7	9	8	5	7	4	8	4	8	17	8	7	10	5	6	4	4	5	7	0	20	139
sp|A2A3N6|PIPSL_HUMAN Putative PIP5K1A and PSMD4-like protein OS=Homo sapiens (Human) OX=9606 GN=PIPSL PE=5 SV=1	59	35	34	53	13	36	62	60	24	42	82	54	24	35	49	74	51	3	22	50	0	20	862
sp|P14222|PERF_HUMAN Perforin-1 OS=Homo sapiens (Human) OX=9606 GN=PRF1 PE=1 SV=1	46	42	17	32	20	27	24	44	25	12	62	17	3	18	33	38	36	12	11	36	0	20	555
sp|Q96NY9|MUS81_HUMAN Crossover junction endonuclease MUS81 OS=Homo sapiens (Human) OX=9606 GN=MUS81 PE=1 SV=3	47	57	15	18	10	26	37	43	17	11	74	20	5	13	42	39	27	6	12	32	0	20	551
sp|Q01362|FCERB_HUMAN High affinity immunoglobulin epsilon receptor subunit beta OS=Homo sapiens (Human) OX=9606 GN=MS4A2 PE=2 SV=1	16	7	7	6	6	5	19	18	4	22	27	10	7	13	11	29	15	2	6	14	0	20	244
sp|Q9NRB3|CHSTC_HUMAN Carbohydrate sulfotransferase 12 OS=Homo sapiens (Human) OX=9606 GN=CHST12 PE=2 SV=2	32	39	11	26	5	14	23	16	14	12	48	22	6	27	29	28	14	9	17	22	0	20	414
sp|P78337|PITX1_HUMAN Pituitary homeobox 1 OS=Homo sapiens (Human) OX=9606 GN=PITX1 PE=1 SV=2	25	20	17	11	5	14	17	29	4	3	23	15	12	11	32	40	13	4	11	8	0	20	314
sp|Q96L11|LCFC1_HUMAN LLLL and CFNLAS motif-containing protein 1 OS=Homo sapiens (Human) OX=9606 GN=LLCFC1 PE=2 SV=1	8	3	3	4	3	11	7	6	5	2	13	5	5	9	10	12	5	1	0	10	0	19	122
sp|B2RUZ4|SMIM1_HUMAN Small integral membrane protein 1 OS=Homo sapiens (Human) OX=9606 GN=SMIM1 PE=1 SV=1	4	6	0	2	3	3	4	9	3	5	7	4	2	2	1	8	3	2	4	6	0	19	78
sp|Q13394|MB211_HUMAN Putative nucleotidyltransferase MAB21L1 OS=Homo sapiens (Human) OX=9606 GN=MAB21L1 PE=1 SV=1	27	25	15	15	13	15	26	16	9	15	41	26	7	11	17	26	11	7	11	26	0	20	359
sp|P15428|PGDH_HUMAN 15-hydroxyprostaglandin dehydrogenase [NAD(+)] OS=Homo sapiens (Human) OX=9606 GN=HPGD PE=1 SV=1	26	6	17	15	4	16	13	24	5	22	26	17	8	9	7	10	13	2	8	18	0	20	266
sp|Q9BQK8|LPIN3_HUMAN Phosphatidate phosphatase LPIN3 OS=Homo sapiens (Human) OX=9606 GN=LPIN3 PE=1 SV=3	51	47	20	52	9	37	65	66	15	27	89	48	9	23	79	84	44	16	20	50	0	20	851
sp|O60673|REV3L_HUMAN DNA polymerase zeta catalytic subunit OS=Homo sapiens (Human) OX=9606 GN=REV3L PE=1 SV=2	151	165	172	158	60	160	211	132	74	155	282	242	66	116	195	346	179	19	85	162	0	20	3130
sp|P48788|TNNI2_HUMAN Troponin I, fast skeletal muscle OS=Homo sapiens (Human) OX=9606 GN=TNNI2 PE=1 SV=2	13	17	5	11	3	8	25	7	5	5	17	23	10	3	5	10	4	1	2	8	0	20	182
sp|Q14195|DPYL3_HUMAN Dihydropyrimidinase-related protein 3 OS=Homo sapiens (Human) OX=9606 GN=DPYSL3 PE=1 SV=1	48	23	24	35	7	21	29	51	13	40	34	34	17	18	31	42	37	7	18	41	0	20	570
sp|Q8IW75|SPA12_HUMAN Serpin A12 OS=Homo sapiens (Human) OX=9606 GN=SERPINA12 PE=1 SV=1	21	16	19	20	2	18	25	25	10	29	52	40	12	25	19	23	24	3	11	20	0	20	414
sp|Q96QF7|ACRC_HUMAN Acidic repeat-containing protein OS=Homo sapiens (Human) OX=9606 GN=GCNA PE=1 SV=1	39	34	29	122	19	16	53	24	13	24	29	60	5	4	49	92	24	5	10	40	0	20	691
sp|Q13724|MOGS_HUMAN Mannosyl-oligosaccharide glucosidase OS=Homo sapiens (Human) OX=9606 GN=MOGS PE=1 SV=5	73	64	13	35	3	38	43	94	28	11	113	20	8	35	70	54	35	25	21	54	0	20	837
sp|P08581|MET_HUMAN Hepatocyte growth factor receptor OS=Homo sapiens (Human) OX=9606 GN=MET PE=1 SV=4	64	56	80	65	41	50	72	80	46	83	134	78	30	70	72	119	88	11	43	108	0	20	1390
sp|Q9NUQ8|ABCF3_HUMAN ATP-binding cassette sub-family F member 3 OS=Homo sapiens (Human) OX=9606 GN=ABCF3 PE=1 SV=2	58	57	23	40	7	37	62	49	15	29	88	35	13	27	26	49	25	5	18	46	0	20	709
sp|O43405|COCH_HUMAN Cochlin OS=Homo sapiens (Human) OX=9606 GN=COCH PE=1 SV=1	46	22	24	28	11	17	26	51	9	36	32	35	10	35	25	44	32	5	12	50	0	20	550
sp|B8ZZ34|SHSA8_HUMAN Protein shisa-8 OS=Homo sapiens (Human) OX=9606 GN=SHISA8 PE=3 SV=3	59	46	7	14	12	15	10	42	6	1	35	8	4	9	59	21	19	4	12	14	0	20	397
sp|P23490|LORI_HUMAN Loricrin OS=Homo sapiens (Human) OX=9606 GN=LOR PE=1 SV=2	3	0	0	1	19	14	0	145	1	5	0	7	1	9	9	72	6	1	8	11	0	16	312
sp|A0A0B4J265|TVAZ2_HUMAN T cell receptor alpha variable 26-2 OS=Homo sapiens (Human) OX=9606 GN=TRAV26-2 PE=3 SV=1	7	6	6	5	2	3	6	5	5	8	12	3	4	0	5	11	9	1	5	6	0	19	109
sp|Q96BM0|I27L1_HUMAN Interferon alpha-inducible protein 27-like protein 1 OS=Homo sapiens (Human) OX=9606 GN=IFI27L1 PE=1 SV=1	22	1	1	1	0	1	1	19	0	5	7	3	4	2	2	14	5	2	0	14	0	17	104
sp|Q5SW96|ARH_HUMAN Low density lipoprotein receptor adapter protein 1 OS=Homo sapiens (Human) OX=9606 GN=LDLRAP1 PE=1 SV=3	30	14	9	20	5	18	19	18	5	9	34	23	7	9	11	27	22	5	5	18	0	20	308
sp|O75116|ROCK2_HUMAN Rho-associated protein kinase 2 OS=Homo sapiens (Human) OX=9606 GN=ROCK2 PE=1 SV=4	83	76	67	90	20	91	156	46	27	66	149	144	41	37	49	85	58	11	33	59	0	20	1388
sp|A6NJ46|NKX63_HUMAN Homeobox protein Nkx-6.3 OS=Homo sapiens (Human) OX=9606 GN=NKX6-3 PE=2 SV=1	22	16	13	12	3	13	12	25	7	5	23	15	3	10	22	25	16	4	9	10	0	20	265
sp|Q14565|DMC1_HUMAN Meiotic recombination protein DMC1/LIM15 homolog OS=Homo sapiens (Human) OX=9606 GN=DMC1 PE=1 SV=2	32	17	9	21	3	15	29	28	8	27	28	25	10	18	10	15	22	0	7	16	0	19	340
sp|Q6B9Z1|IGFL4_HUMAN Insulin growth factor-like family member 4 OS=Homo sapiens (Human) OX=9606 GN=IGFL4 PE=2 SV=1	4	7	4	6	11	7	6	7	2	7	12	4	2	5	10	12	6	3	2	7	0	20	124
sp|O15084|ANR28_HUMAN Serine/threonine-protein phosphatase 6 regulatory ankyrin repeat subunit A OS=Homo sapiens (Human) OX=9606 GN=ANKRD28 PE=1 SV=5	126	37	69	67	30	29	49	74	48	41	131	47	20	23	35	72	61	5	25	64	0	20	1053
sp|Q9H082|RB33B_HUMAN Ras-related protein Rab-33B OS=Homo sapiens (Human) OX=9606 GN=RAB33B PE=1 SV=1	19	13	9	13	6	7	14	11	8	15	16	13	9	12	14	19	11	3	4	13	0	20	229
sp|Q96NM4|TOX2_HUMAN TOX high mobility group box family member 2 OS=Homo sapiens (Human) OX=9606 GN=TOX2 PE=2 SV=2	40	12	12	19	7	29	20	35	13	13	50	22	17	13	65	74	20	3	11	13	0	20	488
sp|Q6ZQY3|GADL1_HUMAN Acidic amino acid decarboxylase GADL1 OS=Homo sapiens (Human) OX=9606 GN=GADL1 PE=1 SV=4	36	26	15	33	14	15	41	33	11	22	55	41	21	22	25	33	15	10	18	35	0	20	521
sp|A6NNN8|S38A8_HUMAN Putative sodium-coupled neutral amino acid transporter 8 OS=Homo sapiens (Human) OX=9606 GN=SLC38A8 PE=1 SV=1	40	14	3	8	15	12	13	37	4	27	60	8	13	26	27	40	20	11	12	45	0	20	435
sp|O00453|LST1_HUMAN Leukocyte-specific transcript 1 protein OS=Homo sapiens (Human) OX=9606 GN=LST1 PE=1 SV=2	7	10	2	6	4	3	6	9	2	3	16	4	1	0	5	8	2	2	3	4	0	19	97
sp|A0A0C4DH32|HV320_HUMAN Immunoglobulin heavy variable 3-20 OS=Homo sapiens (Human) OX=9606 GN=IGHV3-20 PE=3 SV=2	9	7	5	5	3	4	5	16	1	3	11	4	3	5	2	12	4	4	4	10	0	20	117
sp|Q9Y5K2|KLK4_HUMAN Kallikrein-4 OS=Homo sapiens (Human) OX=9606 GN=KLK4 PE=1 SV=2	16	4	12	9	13	13	13	27	7	10	27	6	6	6	14	29	8	6	7	21	0	20	254
sp|Q8IWF7|U2D2L_HUMAN Putative ubiquitin-conjugating enzyme E2 D2-like protein OS=Homo sapiens (Human) OX=9606 GN=UBE2DNL PE=5 SV=1	4	3	2	5	1	3	2	4	4	4	8	6	2	6	7	4	3	2	3	2	0	20	75
sp|Q9H1K4|GHC2_HUMAN Mitochondrial glutamate carrier 2 OS=Homo sapiens (Human) OX=9606 GN=SLC25A18 PE=1 SV=1	36	17	9	11	9	12	10	34	6	19	36	16	14	15	10	16	19	2	7	17	0	20	315
sp|Q6UXQ4|CB066_HUMAN Uncharacterized protein C2orf66 OS=Homo sapiens (Human) OX=9606 GN=C2orf66 PE=3 SV=1	7	9	10	5	1	4	5	6	3	3	16	5	2	8	9	9	7	1	3	4	0	20	117
sp|O43361|ZN749_HUMAN Zinc finger protein 749 OS=Homo sapiens (Human) OX=9606 GN=ZNF749 PE=1 SV=2	26	51	23	26	42	50	62	52	58	33	52	68	7	41	25	57	44	4	27	30	0	20	778
sp|O95807|TM50A_HUMAN Transmembrane protein 50A OS=Homo sapiens (Human) OX=9606 GN=TMEM50A PE=1 SV=1	15	5	5	6	4	4	6	19	2	16	11	5	5	16	2	9	6	6	5	10	0	20	157
sp|P30968|GNRHR_HUMAN Gonadotropin-releasing hormone receptor OS=Homo sapiens (Human) OX=9606 GN=GNRHR PE=1 SV=1	20	9	18	7	8	15	6	11	8	19	49	19	13	28	15	27	20	9	10	17	0	20	328
sp|Q8IYA8|IHO1_HUMAN Interactor of HORMAD1 protein 1 OS=Homo sapiens (Human) OX=9606 GN=CCDC36 PE=1 SV=2	32	24	31	29	12	55	37	36	13	19	59	48	10	23	35	65	21	8	8	29	0	20	594
sp|P06748|NPM_HUMAN Nucleophosmin OS=Homo sapiens (Human) OX=9606 GN=NPM1 PE=1 SV=2	19	8	9	34	3	13	31	18	5	10	19	33	8	7	17	26	10	2	4	18	0	20	294
sp|Q6PJI9|WDR59_HUMAN GATOR complex protein WDR59 OS=Homo sapiens (Human) OX=9606 GN=WDR59 PE=1 SV=2	63	63	39	54	30	46	52	53	33	34	88	49	15	38	56	92	56	22	26	65	0	20	974
sp|Q96T17|MA7D2_HUMAN MAP7 domain-containing protein 2 OS=Homo sapiens (Human) OX=9606 GN=MAP7D2 PE=1 SV=2	59	60	20	25	8	44	102	51	7	20	57	79	15	10	48	52	34	2	9	30	0	20	732
sp|P19429|TNNI3_HUMAN Troponin I, cardiac muscle OS=Homo sapiens (Human) OX=9606 GN=TNNI3 PE=1 SV=3	24	25	4	13	2	9	21	10	3	9	22	23	4	4	7	12	8	1	3	6	0	20	210
sp|P49585|PCY1A_HUMAN Choline-phosphate cytidylyltransferase A OS=Homo sapiens (Human) OX=9606 GN=PCYT1A PE=1 SV=2	27	27	12	23	6	12	34	19	10	16	17	29	8	17	23	30	15	3	12	27	0	20	367
sp|P00451|FA8_HUMAN Coagulation factor VIII OS=Homo sapiens (Human) OX=9606 GN=F8 PE=1 SV=1	110	104	125	121	26	110	148	129	75	110	222	158	61	109	128	219	155	37	79	125	0	20	2351
sp|Q63HQ0|AP1AR_HUMAN AP-1 complex-associated regulatory protein OS=Homo sapiens (Human) OX=9606 GN=AP1AR PE=1 SV=1	15	23	15	22	6	15	38	20	5	7	27	17	7	7	8	34	16	3	8	9	0	20	302
sp|P61956|SUMO2_HUMAN Small ubiquitin-related modifier 2 OS=Homo sapiens (Human) OX=9606 GN=SUMO2 PE=1 SV=3	4	5	4	8	1	9	8	7	2	5	5	8	4	4	4	3	6	0	2	6	0	19	95
sp|P41134|ID1_HUMAN DNA-binding protein inhibitor ID-1 OS=Homo sapiens (Human) OX=9606 GN=ID1 PE=1 SV=3	20	10	5	6	6	6	10	14	1	6	19	6	2	0	8	13	7	0	3	13	0	18	155
sp|Q8N3H0|TAFA2_HUMAN Chemokine-like protein TAFA-2 OS=Homo sapiens (Human) OX=9606 GN=TAFA2 PE=2 SV=1	8	6	4	2	10	5	7	8	7	6	7	15	2	2	4	10	10	4	1	13	0	20	131
sp|P09917|LOX5_HUMAN Arachidonate 5-lipoxygenase OS=Homo sapiens (Human) OX=9606 GN=ALOX5 PE=1 SV=2	43	36	26	44	13	31	48	33	17	44	59	38	16	35	34	33	30	15	30	49	0	20	674
sp|Q96MA1|DMRTB_HUMAN Doublesex- and mab-3-related transcription factor B1 OS=Homo sapiens (Human) OX=9606 GN=DMRTB1 PE=2 SV=1	34	19	5	14	9	20	17	32	6	3	30	11	6	13	64	25	8	1	9	16	0	20	342
sp|Q92551|IP6K1_HUMAN Inositol hexakisphosphate kinase 1 OS=Homo sapiens (Human) OX=9606 GN=IP6K1 PE=1 SV=3	17	35	11	26	12	20	36	30	18	10	40	25	15	14	20	50	15	1	19	27	0	20	441
sp|Q9UKJ0|PILRB_HUMAN Paired immunoglobulin-like type 2 receptor beta OS=Homo sapiens (Human) OX=9606 GN=PILRB PE=1 SV=1	10	19	4	5	2	10	8	18	6	10	31	8	2	9	14	25	19	7	7	13	0	20	227
sp|Q8N8L2|ZN491_HUMAN Zinc finger protein 491 OS=Homo sapiens (Human) OX=9606 GN=ZNF491 PE=2 SV=1	15	37	6	6	34	12	39	33	36	16	12	49	6	25	19	36	31	1	19	5	0	20	437
sp|Q5JZY3|EPHAA_HUMAN Ephrin type-A receptor 10 OS=Homo sapiens (Human) OX=9606 GN=EPHA10 PE=1 SV=2	95	81	13	43	34	41	64	92	21	27	104	21	19	35	72	84	52	17	25	68	0	20	1008
sp|P01100|FOS_HUMAN Proto-oncogene c-Fos OS=Homo sapiens (Human) OX=9606 GN=FOS PE=1 SV=1	40	19	8	20	8	9	31	19	5	8	32	14	10	16	35	55	24	2	7	18	0	20	380
sp|Q9NYF8|BCLF1_HUMAN Bcl-2-associated transcription factor 1 OS=Homo sapiens (Human) OX=9606 GN=BCLAF1 PE=1 SV=2	32	114	27	55	2	31	86	58	31	20	30	92	9	29	49	151	42	6	32	24	0	20	920
sp|Q86YW9|MD12L_HUMAN Mediator of RNA polymerase II transcription subunit 12-like protein OS=Homo sapiens (Human) OX=9606 GN=MED12L PE=1 SV=2	140	105	99	96	48	184	115	110	52	86	244	112	57	65	135	199	102	25	55	116	0	20	2145
sp|Q86Y78|LYPD6_HUMAN Ly6/PLAUR domain-containing protein 6 OS=Homo sapiens (Human) OX=9606 GN=LYPD6 PE=1 SV=1	10	8	8	7	15	3	11	9	5	7	18	6	4	4	12	11	16	4	6	7	0	20	171
sp|P78332|RBM6_HUMAN RNA-binding protein 6 OS=Homo sapiens (Human) OX=9606 GN=RBM6 PE=1 SV=5	45	117	33	102	11	60	102	102	29	28	59	67	20	46	76	90	50	7	41	38	0	20	1123
sp|Q8IXZ2|ZC3H3_HUMAN Zinc finger CCCH domain-containing protein 3 OS=Homo sapiens (Human) OX=9606 GN=ZC3H3 PE=1 SV=3	94	98	16	23	26	36	30	67	26	17	68	68	5	13	104	137	39	9	19	53	0	20	948
sp|Q8WXG6|MADD_HUMAN MAP kinase-activating death domain protein OS=Homo sapiens (Human) OX=9606 GN=MADD PE=1 SV=2	90	99	59	98	23	70	120	103	34	62	167	89	41	60	102	179	82	14	43	112	0	20	1647
sp|P56199|ITA1_HUMAN Integrin alpha-1 OS=Homo sapiens (Human) OX=9606 GN=ITGA1 PE=1 SV=2	60	46	71	60	27	42	73	81	22	79	96	72	26	50	47	101	86	9	41	90	0	20	1179
sp|Q6KF10|GDF6_HUMAN Growth/differentiation factor 6 OS=Homo sapiens (Human) OX=9606 GN=GDF6 PE=1 SV=1	38	42	8	22	9	24	28	35	10	13	44	17	9	16	48	39	14	10	9	20	0	20	455
sp|Q9NRQ2|PLS4_HUMAN Phospholipid scramblase 4 OS=Homo sapiens (Human) OX=9606 GN=PLSCR4 PE=1 SV=2	14	18	15	17	14	15	17	23	7	15	18	9	17	16	41	17	18	3	14	21	0	20	329
sp|O95336|6PGL_HUMAN 6-phosphogluconolactonase OS=Homo sapiens (Human) OX=9606 GN=PGLS PE=1 SV=2	36	14	3	10	5	10	17	16	6	10	37	8	2	10	24	16	12	2	3	17	0	20	258
sp|A6NDN8|UBIML_HUMAN Putative ubiquitin-like protein FUBI-like protein ENSP00000310146 OS=Homo sapiens (Human) OX=9606 GN=- PE=4 SV=2	12	10	2	2	2	4	8	12	3	1	15	2	1	0	3	4	6	2	1	12	0	19	102
sp|Q03518|TAP1_HUMAN Antigen peptide transporter 1 OS=Homo sapiens (Human) OX=9606 GN=TAP1 PE=1 SV=2	79	45	17	22	10	43	41	75	14	25	123	21	14	27	46	67	44	17	18	60	0	20	808
sp|Q8NFF2|NCKX4_HUMAN Sodium/potassium/calcium exchanger 4 OS=Homo sapiens (Human) OX=9606 GN=SLC24A4 PE=1 SV=2	38	28	29	24	14	20	27	45	8	46	61	24	19	35	39	37	31	12	17	68	0	20	622
sp|A1A580|KR231_HUMAN Keratin-associated protein 23-1 OS=Homo sapiens (Human) OX=9606 GN=KRTAP23-1 PE=1 SV=1	1	1	4	1	5	2	2	9	2	1	9	0	1	2	4	13	1	0	6	1	0	18	65
sp|Q9BZ72|PITM2_HUMAN Membrane-associated phosphatidylinositol transfer protein 2 OS=Homo sapiens (Human) OX=9606 GN=PITPNM2 PE=1 SV=1	101	87	36	73	20	61	77	103	45	59	117	56	30	47	91	136	67	18	41	84	0	20	1349
sp|P47872|SCTR_HUMAN Secretin receptor OS=Homo sapiens (Human) OX=9606 GN=SCTR PE=2 SV=2	27	26	17	13	16	20	22	24	14	26	63	11	11	26	18	35	16	12	12	31	0	20	440
sp|A6ND36|FA83G_HUMAN Protein FAM83G OS=Homo sapiens (Human) OX=9606 GN=FAM83G PE=1 SV=2	62	59	19	54	5	45	59	63	23	29	60	40	17	23	86	70	26	11	17	55	0	20	823
sp|Q6ZMY3|SPOC1_HUMAN SPOC domain-containing protein 1 OS=Homo sapiens (Human) OX=9606 GN=SPOCD1 PE=2 SV=1	97	89	18	59	35	73	76	121	26	22	127	43	24	19	141	118	38	15	12	63	0	20	1216
sp|O75677|RFPL1_HUMAN Ret finger protein-like 1 OS=Homo sapiens (Human) OX=9606 GN=RFPL1 PE=1 SV=2	15	21	11	18	16	10	17	18	9	12	34	15	9	17	20	29	17	4	3	22	0	20	317
sp|P05164|PERM_HUMAN Myeloperoxidase OS=Homo sapiens (Human) OX=9606 GN=MPO PE=1 SV=1	57	66	41	36	17	34	35	45	7	30	87	22	23	31	55	47	38	12	19	43	0	20	745
sp|Q9UI14|PRAF1_HUMAN Prenylated Rab acceptor protein 1 OS=Homo sapiens (Human) OX=9606 GN=RABAC1 PE=1 SV=1	19	12	3	4	3	10	12	15	3	7	24	4	3	12	8	11	7	4	7	17	0	20	185
sp|Q9Y446|PKP3_HUMAN Plakophilin-3 OS=Homo sapiens (Human) OX=9606 GN=PKP3 PE=1 SV=1	87	75	31	42	8	37	44	60	19	20	101	27	7	19	44	79	29	7	19	42	0	20	797
sp|O00512|BCL9_HUMAN B-cell CLL/lymphoma 9 protein OS=Homo sapiens (Human) OX=9606 GN=BCL9 PE=1 SV=4	78	58	70	46	4	98	53	166	33	43	78	49	90	34	249	151	57	4	8	57	0	20	1426
sp|Q7Z5L4|SPT19_HUMAN Spermatogenesis-associated protein 19, mitochondrial OS=Homo sapiens (Human) OX=9606 GN=SPATA19 PE=2 SV=2	5	14	2	11	1	8	13	5	8	15	11	8	5	4	7	21	11	3	1	14	0	20	167
sp|P51993|FUT6_HUMAN Alpha-(1,3)-fucosyltransferase 6 OS=Homo sapiens (Human) OX=9606 GN=FUT6 PE=1 SV=1	28	26	11	18	8	16	14	13	10	10	35	13	9	17	32	30	17	17	18	17	0	20	359
sp|Q14562|DHX8_HUMAN ATP-dependent RNA helicase DHX8 OS=Homo sapiens (Human) OX=9606 GN=DHX8 PE=1 SV=1	75	98	39	80	15	54	99	60	20	64	109	90	41	35	68	76	74	10	34	79	0	20	1220
sp|P60329|KR124_HUMAN Keratin-associated protein 12-4 OS=Homo sapiens (Human) OX=9606 GN=KRTAP12-4 PE=1 SV=1	6	2	0	0	26	3	1	7	2	0	5	1	2	2	18	13	9	1	3	11	0	17	112
sp|Q6P1M0|S27A4_HUMAN Long-chain fatty acid transport protein 4 OS=Homo sapiens (Human) OX=9606 GN=SLC27A4 PE=1 SV=1	46	45	21	33	16	23	33	54	12	30	76	31	12	34	31	35	32	8	25	46	0	20	643
sp|Q8TDY8|IGDC4_HUMAN Immunoglobulin superfamily DCC subclass member 4 OS=Homo sapiens (Human) OX=9606 GN=IGDCC4 PE=1 SV=1	118	67	37	52	23	55	76	103	35	36	132	36	15	24	116	109	68	23	28	97	0	20	1250
sp|P36969|GPX4_HUMAN Phospholipid hydroperoxide glutathione peroxidase OS=Homo sapiens (Human) OX=9606 GN=GPX4 PE=1 SV=3	16	9	10	11	9	5	10	17	5	10	18	17	7	10	9	7	5	4	6	11	1	20	197
sp|Q9HAS3|S28A3_HUMAN Solute carrier family 28 member 3 OS=Homo sapiens (Human) OX=9606 GN=SLC28A3 PE=1 SV=1	53	27	30	18	14	21	34	51	16	48	73	26	23	47	25	61	38	16	21	49	0	20	691
sp|Q13636|RAB31_HUMAN Ras-related protein Rab-31 OS=Homo sapiens (Human) OX=9606 GN=RAB31 PE=1 SV=1	15	8	9	10	6	6	14	13	6	17	12	15	5	7	9	12	10	2	5	13	0	20	194
sp|Q96PE1|AGRA2_HUMAN Adhesion G protein-coupled receptor A2 OS=Homo sapiens (Human) OX=9606 GN=ADGRA2 PE=1 SV=2	138	89	46	34	41	42	64	138	42	43	173	30	20	32	101	116	63	23	29	74	0	20	1338
sp|A6NJW9|CD8B2_HUMAN T-cell surface glycoprotein CD8 beta-2 chain OS=Homo sapiens (Human) OX=9606 GN=CD8B2 PE=3 SV=3	12	15	4	5	7	11	9	11	5	8	29	14	7	8	11	16	14	3	4	17	0	20	210
sp|A8MQB3|CQ051_HUMAN Putative uncharacterized protein LINC02693 OS=Homo sapiens (Human) OX=9606 GN=LINC02693 PE=5 SV=1	19	22	2	7	10	9	11	12	7	5	23	11	4	4	29	27	9	4	2	4	0	20	221
sp|Q96LR4|TAFA4_HUMAN Chemokine-like protein TAFA-4 OS=Homo sapiens (Human) OX=9606 GN=TAFA4 PE=1 SV=1	8	9	4	2	13	7	6	8	7	4	9	10	5	2	5	14	7	4	2	14	0	20	140
sp|O14836|TR13B_HUMAN Tumor necrosis factor receptor superfamily member 13B OS=Homo sapiens (Human) OX=9606 GN=TNFRSF13B PE=1 SV=1	20	24	6	10	26	17	17	25	7	5	23	9	4	8	26	29	14	3	5	15	0	20	293
sp|O15394|NCAM2_HUMAN Neural cell adhesion molecule 2 OS=Homo sapiens (Human) OX=9606 GN=NCAM2 PE=1 SV=2	46	35	43	40	14	35	73	60	15	66	60	58	12	24	42	68	50	9	28	59	0	20	837
sp|P14854|CX6B1_HUMAN Cytochrome c oxidase subunit 6B1 OS=Homo sapiens (Human) OX=9606 GN=COX6B1 PE=1 SV=2	5	5	5	6	4	7	5	4	1	3	2	6	3	4	4	4	7	4	4	3	0	20	86
sp|Q96G97|BSCL2_HUMAN Seipin OS=Homo sapiens (Human) OX=9606 GN=BSCL2 PE=1 SV=3	24	24	9	15	6	19	29	28	8	14	49	6	8	17	26	43	22	6	18	27	0	20	398
sp|P02787|TRFE_HUMAN Serotransferrin OS=Homo sapiens (Human) OX=9606 GN=TF PE=1 SV=3	61	27	34	45	40	17	42	52	19	16	65	58	10	28	32	41	30	8	26	47	0	20	698
sp|Q68DH5|LMBD2_HUMAN G-protein coupled receptor-associated protein LMBRD2 OS=Homo sapiens (Human) OX=9606 GN=LMBRD2 PE=1 SV=1	39	38	34	28	13	25	43	31	18	46	74	33	16	47	28	47	42	14	42	37	0	20	695
sp|A0A0B4J268|TVA4_HUMAN T cell receptor alpha variable 4 OS=Homo sapiens (Human) OX=9606 GN=TRAV4 PE=1 SV=1	6	5	5	5	2	7	3	4	1	8	9	4	2	4	5	12	11	1	6	9	0	20	109
sp|P05556|ITB1_HUMAN Integrin beta-1 OS=Homo sapiens (Human) OX=9606 GN=ITGB1 PE=1 SV=2	30	29	58	42	58	29	63	62	10	48	50	57	15	29	35	59	44	6	23	51	0	20	798
sp|P43365|MAGAC_HUMAN Melanoma-associated antigen 12 OS=Homo sapiens (Human) OX=9606 GN=MAGEA12 PE=1 SV=2	22	12	5	10	4	15	37	21	9	14	38	11	3	12	22	27	15	4	10	23	0	20	314
sp|Q13423|NNTM_HUMAN NAD(P) transhydrogenase, mitochondrial OS=Homo sapiens (Human) OX=9606 GN=NNT PE=1 SV=3	127	24	40	38	13	35	43	117	16	70	119	62	35	36	53	63	71	4	35	85	0	20	1086
sp|Q8NFF5|FAD1_HUMAN FAD synthase OS=Homo sapiens (Human) OX=9606 GN=FLAD1 PE=1 SV=1	43	41	14	22	13	29	39	49	12	18	75	17	8	25	45	38	36	9	21	33	0	20	587
sp|Q6ZQT7|YJ013_HUMAN Putative uncharacterized protein FLJ44672 OS=Homo sapiens (Human) OX=9606 GN=- PE=2 SV=1	31	16	2	4	3	12	9	24	2	1	31	3	2	5	46	42	6	3	0	9	0	19	251
tr|A0A075B6W6|A0A075B6W6_HUMAN T cell receptor alpha joining 27 OS=Homo sapiens (Human) OX=9606 GN=TRAJ27 PE=4 SV=1	1	0	2	1	0	0	0	3	0	0	1	2	0	1	1	1	5	0	0	1	1	11	20
sp|O00459|P85B_HUMAN Phosphatidylinositol 3-kinase regulatory subunit beta OS=Homo sapiens (Human) OX=9606 GN=PIK3R2 PE=1 SV=2	63	58	17	38	6	38	64	50	17	20	84	34	8	19	69	39	33	8	25	38	0	20	728
sp|P61006|RAB8A_HUMAN Ras-related protein Rab-8A OS=Homo sapiens (Human) OX=9606 GN=RAB8A PE=1 SV=1	13	13	12	15	3	7	12	14	1	19	15	20	6	13	2	12	13	2	6	9	0	20	207
sp|Q96FC9|DDX11_HUMAN ATP-dependent DNA helicase DDX11 OS=Homo sapiens (Human) OX=9606 GN=DDX11 PE=1 SV=1	73	69	24	32	31	71	88	73	23	33	102	50	19	34	55	62	35	7	21	68	0	20	970
sp|Q86YB7|ECHD2_HUMAN Enoyl-CoA hydratase domain-containing protein 2, mitochondrial OS=Homo sapiens (Human) OX=9606 GN=ECHDC2 PE=1 SV=2	42	29	7	11	6	12	20	32	2	13	36	7	9	9	12	10	11	1	2	21	0	20	292
sp|Q86V25|VASH2_HUMAN Tubulinyl-Tyr carboxypeptidase 2 OS=Homo sapiens (Human) OX=9606 GN=VASH2 PE=1 SV=2	21	29	10	12	3	11	20	24	14	19	30	28	14	13	24	30	18	4	13	18	0	20	355
sp|O00213|APBB1_HUMAN Amyloid-beta A4 precursor protein-binding family B member 1 OS=Homo sapiens (Human) OX=9606 GN=APBB1 PE=1 SV=2	69	36	26	30	13	34	68	54	20	16	70	25	13	19	59	66	31	15	9	37	0	20	710
sp|E5RJ46|CH087_HUMAN Uncharacterized protein C8orf87 OS=Homo sapiens (Human) OX=9606 GN=C8orf87 PE=4 SV=1	9	12	1	3	1	5	5	5	5	1	8	6	3	1	6	9	12	3	0	6	0	19	101
sp|Q9HBU6|EKI1_HUMAN Ethanolamine kinase 1 OS=Homo sapiens (Human) OX=9606 GN=ETNK1 PE=1 SV=1	37	23	23	19	9	20	30	27	12	25	44	20	7	22	26	28	16	8	19	37	0	20	452
sp|Q8IYB0|YK038_HUMAN Putative uncharacterized protein MGC39545 OS=Homo sapiens (Human) OX=9606 GN=- PE=5 SV=2	24	19	4	9	4	6	11	18	5	3	14	11	4	4	21	19	10	4	3	3	0	20	196
sp|Q8TAK6|OLIG1_HUMAN Oligodendrocyte transcription factor 1 OS=Homo sapiens (Human) OX=9606 GN=OLIG1 PE=1 SV=2	39	18	4	6	5	14	11	28	3	4	39	10	4	3	31	27	8	0	7	10	0	19	271
sp|P05062|ALDOB_HUMAN Fructose-bisphosphate aldolase B OS=Homo sapiens (Human) OX=9606 GN=ALDOB PE=1 SV=2	44	14	17	13	9	22	23	29	9	19	33	24	7	10	13	21	21	3	11	22	0	20	364
sp|B6A8C7|TARM1_HUMAN T-cell-interacting, activating receptor on myeloid cells protein 1 OS=Homo sapiens (Human) OX=9606 GN=TARM1 PE=1 SV=1	19	14	9	9	6	10	12	22	3	10	32	12	4	11	20	27	16	4	9	22	0	20	271
sp|Q14442|PIGH_HUMAN Phosphatidylinositol N-acetylglucosaminyltransferase subunit H OS=Homo sapiens (Human) OX=9606 GN=PIGH PE=1 SV=1	11	9	2	7	9	8	11	9	3	17	24	8	5	7	7	19	11	1	9	11	0	20	188
sp|Q7L3S4|ZN771_HUMAN Zinc finger protein 771 OS=Homo sapiens (Human) OX=9606 GN=ZNF771 PE=1 SV=1	35	43	4	8	21	8	33	27	21	3	13	14	5	11	21	16	18	0	8	8	0	19	317
sp|P17612|KAPCA_HUMAN cAMP-dependent protein kinase catalytic subunit alpha OS=Homo sapiens (Human) OX=9606 GN=PRKACA PE=1 SV=2	23	15	16	18	2	14	27	22	9	21	32	35	7	25	14	17	14	6	14	20	0	20	351
sp|A6NK53|ZN233_HUMAN Zinc finger protein 233 OS=Homo sapiens (Human) OX=9606 GN=ZNF233 PE=2 SV=3	14	35	27	35	35	56	43	53	44	21	48	57	7	24	18	63	26	8	22	34	0	20	670
sp|Q9UKG1|DP13A_HUMAN DCC-interacting protein 13-alpha OS=Homo sapiens (Human) OX=9606 GN=APPL1 PE=1 SV=1	48	38	30	41	12	48	62	34	14	36	65	43	18	27	27	71	40	2	18	35	0	20	709
sp|Q15573|TAF1A_HUMAN TATA box-binding protein-associated factor RNA polymerase I subunit A OS=Homo sapiens (Human) OX=9606 GN=TAF1A PE=1 SV=1	32	18	21	19	4	18	31	22	15	23	49	44	12	21	12	32	17	14	26	20	0	20	450
sp|P55212|CASP6_HUMAN Caspase-6 OS=Homo sapiens (Human) OX=9606 GN=CASP6 PE=1 SV=2	19	17	11	20	10	7	20	19	12	13	26	20	7	18	10	18	16	2	10	18	0	20	293
sp|O75448|MED24_HUMAN Mediator of RNA polymerase II transcription subunit 24 OS=Homo sapiens (Human) OX=9606 GN=MED24 PE=1 SV=1	80	39	36	42	26	44	64	45	25	51	141	61	34	36	40	84	55	18	13	55	0	20	989
sp|Q9UHM6|OPN4_HUMAN Melanopsin OS=Homo sapiens (Human) OX=9606 GN=OPN4 PE=1 SV=1	49	27	8	8	11	15	15	31	11	27	52	10	13	23	38	47	32	14	19	28	0	20	478
sp|Q9NWH7|SPAT6_HUMAN Spermatogenesis-associated protein 6 OS=Homo sapiens (Human) OX=9606 GN=SPATA6 PE=1 SV=1	21	40	16	34	18	16	30	18	23	14	37	35	9	17	34	55	24	3	18	26	0	20	488
sp|Q719I0|AHSA2_HUMAN Putative activator of 90 kDa heat shock protein ATPase homolog 2 OS=Homo sapiens (Human) OX=9606 GN=AHSA2P PE=5 SV=2	15	9	15	9	4	12	31	24	5	16	31	31	9	10	8	15	21	9	4	21	0	20	299
sp|Q9HAH1|ZN556_HUMAN Zinc finger protein 556 OS=Homo sapiens (Human) OX=9606 GN=ZNF556 PE=2 SV=1	23	34	13	8	28	17	26	37	28	7	22	60	6	16	18	47	26	6	12	22	0	20	456
sp|P02686|MBP_HUMAN Myelin basic protein OS=Homo sapiens (Human) OX=9606 GN=MBP PE=1 SV=3	25	29	13	22	0	12	16	34	13	6	15	19	4	12	18	34	19	2	4	7	0	19	304
sp|Q68DD2|PA24F_HUMAN Cytosolic phospholipase A2 zeta OS=Homo sapiens (Human) OX=9606 GN=PLA2G4F PE=2 SV=3	57	49	22	40	15	51	60	61	17	21	119	27	14	35	56	61	43	14	31	56	0	20	849
sp|P22307|NLTP_HUMAN Non-specific lipid-transfer protein OS=Homo sapiens (Human) OX=9606 GN=SCP2 PE=1 SV=2	52	11	21	26	12	24	34	56	11	27	45	46	18	25	23	36	26	5	14	35	0	20	547
sp|P55289|CAD12_HUMAN Cadherin-12 OS=Homo sapiens (Human) OX=9606 GN=CDH12 PE=2 SV=2	47	39	34	67	7	34	53	51	10	56	65	37	9	32	51	51	55	5	29	62	0	20	794
sp|Q8IW40|CC103_HUMAN Coiled-coil domain-containing protein 103 OS=Homo sapiens (Human) OX=9606 GN=CCDC103 PE=1 SV=1	21	19	6	10	4	15	26	20	4	6	36	13	3	8	10	13	9	3	5	11	0	20	242
sp|Q92935|EXTL1_HUMAN Exostosin-like 1 OS=Homo sapiens (Human) OX=9606 GN=EXTL1 PE=2 SV=2	64	47	9	26	13	36	32	45	17	20	83	16	8	32	68	58	34	19	13	36	0	20	676
sp|O15439|MRP4_HUMAN Multidrug resistance-associated protein 4 OS=Homo sapiens (Human) OX=9606 GN=ABCC4 PE=1 SV=3	93	65	47	57	16	57	76	73	28	93	167	75	29	66	47	93	81	24	39	99	0	20	1325
sp|Q68DN1|CB016_HUMAN Uncharacterized protein C2orf16 OS=Homo sapiens (Human) OX=9606 GN=C2orf16 PE=2 SV=3	65	187	41	44	28	131	147	98	96	81	157	118	33	38	172	279	123	13	36	97	0	20	1984
sp|Q9P0V8|SLAF8_HUMAN SLAM family member 8 OS=Homo sapiens (Human) OX=9606 GN=SLAMF8 PE=1 SV=1	18	14	5	14	6	11	14	17	7	7	37	9	6	10	21	27	16	11	5	30	0	20	285
sp|P0CG36|CFC1B_HUMAN Cryptic family protein 1B OS=Homo sapiens (Human) OX=9606 GN=CFC1B PE=3 SV=1	18	22	5	5	14	7	12	22	15	3	28	4	1	7	18	15	10	5	3	9	0	20	223
sp|Q8NHP8|PLBL2_HUMAN Putative phospholipase B-like 2 OS=Homo sapiens (Human) OX=9606 GN=PLBD2 PE=1 SV=2	48	28	28	28	8	26	24	48	9	21	71	21	15	23	37	49	22	19	25	39	0	20	589
sp|Q9HC44|GPBL1_HUMAN Vasculin-like protein 1 OS=Homo sapiens (Human) OX=9606 GN=GPBP1L1 PE=1 SV=1	27	26	23	24	6	13	43	36	19	7	30	35	7	21	38	64	24	9	3	19	0	20	474
sp|Q86TU6|CN070_HUMAN Putative uncharacterized protein encoded by LINC00523 OS=Homo sapiens (Human) OX=9606 GN=LINC00523 PE=5 SV=1	2	10	5	6	0	4	11	9	1	6	10	13	4	0	0	9	6	2	1	6	0	17	105
sp|Q8N823|ZN611_HUMAN Zinc finger protein 611 OS=Homo sapiens (Human) OX=9606 GN=ZNF611 PE=1 SV=2	26	43	32	23	48	32	54	40	54	31	45	76	7	26	23	59	39	3	24	20	0	20	705
sp|Q96EY8|MMAB_HUMAN Corrinoid adenosyltransferase OS=Homo sapiens (Human) OX=9606 GN=MMAB PE=1 SV=1	22	18	4	11	6	11	17	23	3	9	26	15	4	12	14	19	17	1	7	11	0	20	250
tr|A0A494C0Z2|A0A494C0Z2_HUMAN Uncharacterized protein OS=Homo sapiens (Human) OX=9606 GN=ENSG00000286014 PE=4 SV=1	18	24	5	15	6	12	27	8	6	9	30	13	8	11	19	18	4	8	12	12	0	20	265
sp|Q9BZ81|MAGB5_HUMAN Melanoma-associated antigen B5 OS=Homo sapiens (Human) OX=9606 GN=MAGEB5 PE=2 SV=2	14	13	13	12	8	13	21	12	7	12	25	21	7	14	13	23	10	3	17	17	0	20	275
sp|A5PLL7|TM189_HUMAN Transmembrane protein 189 OS=Homo sapiens (Human) OX=9606 GN=TMEM189 PE=1 SV=3	20	14	7	12	8	9	17	18	16	18	35	10	3	13	14	9	15	13	6	13	0	20	270
sp|Q96CC6|RHDF1_HUMAN Inactive rhomboid protein 1 OS=Homo sapiens (Human) OX=9606 GN=RHBDF1 PE=1 SV=2	59	73	12	40	28	37	53	48	28	39	83	35	13	52	56	69	42	17	19	52	0	20	855
sp|Q86SH4|PRNT_HUMAN Putative testis-specific prion protein OS=Homo sapiens (Human) OX=9606 GN=PRNT PE=5 SV=1	6	2	2	2	3	4	0	0	9	5	15	5	2	7	7	10	6	2	1	6	0	18	94
sp|Q8NEG4|FA83F_HUMAN Protein FAM83F OS=Homo sapiens (Human) OX=9606 GN=FAM83F PE=1 SV=1	51	44	13	25	6	20	40	35	8	14	42	24	13	17	31	43	20	6	14	34	0	20	500
sp|Q96JT2|S45A3_HUMAN Solute carrier family 45 member 3 OS=Homo sapiens (Human) OX=9606 GN=SLC45A3 PE=2 SV=1	59	33	3	18	20	15	21	50	9	15	95	7	12	28	37	38	26	6	16	45	0	20	553
sp|Q99759|M3K3_HUMAN Mitogen-activated protein kinase kinase kinase 3 OS=Homo sapiens (Human) OX=9606 GN=MAP3K3 PE=1 SV=2	32	55	27	34	7	34	40	41	20	29	51	28	20	16	34	69	29	4	24	32	0	20	626
sp|P19838|NFKB1_HUMAN Nuclear factor NF-kappa-B p105 subunit OS=Homo sapiens (Human) OX=9606 GN=NFKB1 PE=1 SV=2	73	35	35	69	11	41	64	90	30	37	110	58	22	32	50	60	61	4	26	60	0	20	968
sp|Q6UX53|MET7B_HUMAN Methyltransferase-like protein 7B OS=Homo sapiens (Human) OX=9606 GN=METTL7B PE=1 SV=2	12	12	5	7	9	13	15	17	6	5	34	15	10	12	19	11	10	7	5	20	0	20	244
sp|Q15051|IQCB1_HUMAN IQ calmodulin-binding motif-containing protein 1 OS=Homo sapiens (Human) OX=9606 GN=IQCB1 PE=1 SV=1	41	40	13	19	8	49	53	26	17	37	88	46	13	18	21	39	21	7	14	28	0	20	598
sp|Q0VFZ6|CC173_HUMAN Coiled-coil domain-containing protein 173 OS=Homo sapiens (Human) OX=9606 GN=CCDC173 PE=2 SV=2	41	48	16	25	4	37	91	16	15	29	40	78	15	15	9	17	14	6	15	21	0	20	552
sp|Q17RF5|ODAPH_HUMAN Odontogenesis associated phosphoprotein OS=Homo sapiens (Human) OX=9606 GN=ODAPH PE=1 SV=1	6	18	4	3	5	6	5	3	5	3	6	1	1	13	19	8	9	3	5	7	0	20	130
sp|P39748|FEN1_HUMAN Flap endonuclease 1 OS=Homo sapiens (Human) OX=9606 GN=FEN1 PE=1 SV=1	31	22	8	16	6	20	38	27	8	20	36	38	10	14	17	27	12	2	8	20	0	20	380
sp|Q9Y5Z7|HCFC2_HUMAN Host cell factor 2 OS=Homo sapiens (Human) OX=9606 GN=HCFC2 PE=1 SV=1	54	35	44	33	17	26	37	59	20	35	57	46	13	24	55	79	59	16	27	56	0	20	792
sp|Q9H0V1|TM168_HUMAN Transmembrane protein 168 OS=Homo sapiens (Human) OX=9606 GN=TMEM168 PE=2 SV=2	34	33	25	25	22	9	31	41	21	49	104	29	17	49	22	53	44	18	27	44	0	20	697
sp|Q5UAW9|GP157_HUMAN G-protein coupled receptor 157 OS=Homo sapiens (Human) OX=9606 GN=GPR157 PE=2 SV=2	32	19	5	9	11	9	9	20	8	12	54	10	5	12	23	31	19	10	8	29	0	20	335
sp|Q96LB4|VATG3_HUMAN V-type proton ATPase subunit G 3 OS=Homo sapiens (Human) OX=9606 GN=ATP6V1G3 PE=2 SV=1	6	7	7	5	1	12	13	5	3	6	10	15	8	1	1	7	3	0	4	4	0	19	118
sp|Q5HYI8|RABL3_HUMAN Rab-like protein 3 OS=Homo sapiens (Human) OX=9606 GN=RABL3 PE=1 SV=1	11	14	14	16	3	8	13	18	6	9	25	14	1	10	8	19	13	3	8	23	0	20	236
sp|Q9BYT8|NEUL_HUMAN Neurolysin, mitochondrial OS=Homo sapiens (Human) OX=9606 GN=NLN PE=1 SV=1	41	41	25	43	13	26	54	41	16	28	81	49	29	30	25	42	39	6	30	45	0	20	704
sp|Q9NPC6|MYOZ2_HUMAN Myozenin-2 OS=Homo sapiens (Human) OX=9606 GN=MYOZ2 PE=1 SV=1	13	16	16	15	0	12	18	15	4	12	20	18	10	13	27	20	15	2	7	11	0	19	264
sp|Q9Y6G5|COMDA_HUMAN COMM domain-containing protein 10 OS=Homo sapiens (Human) OX=9606 GN=COMMD10 PE=1 SV=1	19	7	8	6	1	17	20	4	6	9	30	16	4	9	6	16	8	2	2	12	0	20	202
sp|Q9HBL6|LRTM1_HUMAN Leucine-rich repeat and transmembrane domain-containing protein 1 OS=Homo sapiens (Human) OX=9606 GN=LRTM1 PE=2 SV=1	22	12	18	12	13	21	18	19	14	14	58	13	5	8	26	27	15	6	6	18	0	20	345
sp|P62857|RS28_HUMAN 40S ribosomal protein S28 OS=Homo sapiens (Human) OX=9606 GN=RPS28 PE=1 SV=1	2	11	1	4	1	4	5	5	0	3	6	3	2	1	2	5	6	0	0	8	0	17	69
sp|Q9NV56|MRGBP_HUMAN MRG/MORF4L-binding protein OS=Homo sapiens (Human) OX=9606 GN=MRGBP PE=1 SV=1	14	11	8	12	3	4	23	17	7	8	9	17	8	6	12	20	6	2	1	16	0	20	204
sp|O60656|UD19_HUMAN UDP-glucuronosyltransferase 1-9 OS=Homo sapiens (Human) OX=9606 GN=UGT1A9 PE=1 SV=1	36	22	19	23	15	10	29	31	21	25	61	33	21	28	26	34	26	9	19	42	0	20	530
sp|P27815|PDE4A_HUMAN cAMP-specific 3',5'-cyclic phosphodiesterase 4A OS=Homo sapiens (Human) OX=9606 GN=PDE4A PE=1 SV=3	74	53	27	45	11	48	77	45	27	27	90	27	28	24	68	88	55	10	17	45	0	20	886
sp|Q8N9F8|ZN454_HUMAN Zinc finger protein 454 OS=Homo sapiens (Human) OX=9606 GN=ZNF454 PE=2 SV=2	27	25	22	11	29	32	45	28	39	26	30	51	7	24	21	43	31	6	11	14	0	20	522
sp|Q9UQ16|DYN3_HUMAN Dynamin-3 OS=Homo sapiens (Human) OX=9606 GN=DNM3 PE=1 SV=4	50	58	40	50	7	41	60	47	16	60	84	57	21	32	65	61	45	5	17	53	0	20	869
sp|Q8N6U8|GP161_HUMAN G-protein coupled receptor 161 OS=Homo sapiens (Human) OX=9606 GN=GPR161 PE=2 SV=1	38	28	15	14	14	14	28	38	9	30	59	20	13	26	19	55	31	13	17	48	0	20	529
sp|Q6UW02|CP20A_HUMAN Cytochrome P450 20A1 OS=Homo sapiens (Human) OX=9606 GN=CYP20A1 PE=1 SV=1	18	20	17	22	6	23	34	27	11	24	57	28	12	23	18	36	29	6	13	38	0	20	462
sp|Q13367|AP3B2_HUMAN AP-3 complex subunit beta-2 OS=Homo sapiens (Human) OX=9606 GN=AP3B2 PE=1 SV=2	92	53	32	59	11	46	92	55	19	53	107	72	27	28	61	110	56	5	27	77	0	20	1082
sp|Q96JK9|MAML3_HUMAN Mastermind-like protein 3 OS=Homo sapiens (Human) OX=9606 GN=MAML3 PE=1 SV=4	96	41	69	35	8	173	41	94	24	29	83	34	46	22	119	111	53	4	16	40	0	20	1138
sp|Q8IVY1|CA210_HUMAN Type III endosome membrane protein TEMP OS=Homo sapiens (Human) OX=9606 GN=C1orf210 PE=3 SV=1	11	8	3	6	2	2	8	14	4	3	12	2	1	3	9	6	7	1	3	8	0	20	113
sp|Q15124|PGM5_HUMAN Phosphoglucomutase-like protein 5 OS=Homo sapiens (Human) OX=9606 GN=PGM5 PE=1 SV=2	42	39	15	35	10	19	27	57	10	43	46	22	13	27	32	41	26	4	21	38	0	20	567
sp|Q92794|KAT6A_HUMAN Histone acetyltransferase KAT6A OS=Homo sapiens (Human) OX=9606 GN=KAT6A PE=1 SV=2	94	107	75	94	47	140	206	104	44	70	144	140	61	39	172	222	90	14	51	90	0	20	2004
sp|Q9BYG7|MSTRO_HUMAN Protein maestro OS=Homo sapiens (Human) OX=9606 GN=MRO PE=2 SV=2	14	17	7	12	2	19	11	9	5	12	29	25	6	16	10	17	13	2	10	12	0	20	248
sp|Q9H7S9|ZN703_HUMAN Zinc finger protein 703 OS=Homo sapiens (Human) OX=9606 GN=ZNF703 PE=1 SV=1	75	17	8	17	10	14	15	83	23	5	58	25	3	8	79	95	14	1	20	20	0	20	590
sp|Q8NEV8|EXPH5_HUMAN Exophilin-5 OS=Homo sapiens (Human) OX=9606 GN=EXPH5 PE=1 SV=3	86	122	122	96	24	98	153	94	54	64	136	131	35	86	141	291	123	15	34	84	0	20	1989
sp|P36543|VATE1_HUMAN V-type proton ATPase subunit E 1 OS=Homo sapiens (Human) OX=9606 GN=ATP6V1E1 PE=1 SV=1	19	14	10	16	1	20	20	8	1	16	24	23	10	5	5	6	6	0	7	15	0	19	226
sp|Q16348|S15A2_HUMAN Solute carrier family 15 member 2 OS=Homo sapiens (Human) OX=9606 GN=SLC15A2 PE=1 SV=2	49	21	34	24	12	29	33	43	16	53	82	41	21	44	37	55	35	12	29	59	0	20	729
sp|Q15911|ZFHX3_HUMAN Zinc finger homeobox protein 3 OS=Homo sapiens (Human) OX=9606 GN=ZFHX3 PE=1 SV=2	276	129	153	160	82	291	268	232	102	96	345	225	80	108	337	388	197	15	80	139	0	20	3703
sp|Q13286|CLN3_HUMAN Battenin OS=Homo sapiens (Human) OX=9606 GN=CLN3 PE=1 SV=1	39	18	11	11	10	14	19	36	12	18	73	5	5	25	22	49	20	10	14	27	0	20	438
sp|Q9BVP2|GNL3_HUMAN Guanine nucleotide-binding protein-like 3 OS=Homo sapiens (Human) OX=9606 GN=GNL3 PE=1 SV=2	35	30	22	24	9	25	55	29	8	27	48	67	10	16	29	44	21	5	10	35	0	20	549
tr|A0A590UK83|A0A590UK83_HUMAN Long intergenic non-protein coding RNA 634 OS=Homo sapiens (Human) OX=9606 GN=LINC00634 PE=4 SV=1	6	16	3	2	3	4	14	9	1	0	5	3	4	2	9	9	4	3	0	10	0	18	107
tr|A0A075B7D0|A0A075B7D0_HUMAN Ig-like domain-containing protein OS=Homo sapiens (Human) OX=9606 GN=IGHV1OR15-1 PE=1 SV=1	12	7	3	4	2	7	4	10	2	4	6	5	4	3	3	11	11	4	7	8	0	20	117
sp|Q6X4T0|CL054_HUMAN Uncharacterized protein C12orf54 OS=Homo sapiens (Human) OX=9606 GN=C12orf54 PE=2 SV=2	4	9	2	5	2	15	9	6	2	6	8	7	7	3	10	13	12	1	2	4	0	20	127
sp|Q495M3|S36A2_HUMAN Proton-coupled amino acid transporter 2 OS=Homo sapiens (Human) OX=9606 GN=SLC36A2 PE=1 SV=1	32	14	19	15	11	11	16	28	9	43	73	21	17	26	25	40	28	5	14	36	0	20	483
sp|Q8NBR9|CK072_HUMAN Uncharacterized protein C11orf72 OS=Homo sapiens (Human) OX=9606 GN=C11orf72 PE=2 SV=1	11	13	7	3	10	14	5	14	9	6	42	9	4	8	39	27	10	4	10	6	0	20	251
sp|A6NDX5|ZN840_HUMAN Putative zinc finger protein 840 OS=Homo sapiens (Human) OX=9606 GN=ZNF840P PE=5 SV=5	23	40	44	13	42	40	40	43	57	18	44	83	12	42	25	50	53	5	20	22	0	20	716
sp|Q9UNK9|ANGE1_HUMAN Protein angel homolog 1 OS=Homo sapiens (Human) OX=9606 GN=ANGEL1 PE=1 SV=1	49	37	19	34	24	37	57	43	15	20	89	14	17	26	49	47	25	15	19	34	0	20	670
sp|A6NHQ2|FBLL1_HUMAN rRNA/tRNA 2'-O-methyltransferase fibrillarin-like protein 1 OS=Homo sapiens (Human) OX=9606 GN=FBLL1 PE=3 SV=2	28	30	8	14	1	11	14	67	9	14	19	20	5	9	12	22	10	3	8	30	0	20	334
sp|Q13591|SEM5A_HUMAN Semaphorin-5A OS=Homo sapiens (Human) OX=9606 GN=SEMA5A PE=1 SV=3	60	68	59	39	62	47	64	78	25	43	80	34	16	43	65	91	72	29	39	60	0	20	1074
sp|Q5TAG4|NBPFC_HUMAN Neuroblastoma breakpoint family member 12 OS=Homo sapiens (Human) OX=9606 GN=NBPF12 PE=2 SV=3	64	90	40	96	39	111	208	51	25	32	159	105	18	32	83	132	38	5	43	86	0	20	1457
sp|Q8IVC4|ZN584_HUMAN Zinc finger protein 584 OS=Homo sapiens (Human) OX=9606 GN=ZNF584 PE=2 SV=1	20	33	8	14	20	19	35	30	28	9	29	32	3	22	19	31	26	4	12	27	0	20	421
sp|P35268|RL22_HUMAN 60S ribosomal protein L22 OS=Homo sapiens (Human) OX=9606 GN=RPL22 PE=1 SV=2	5	6	7	7	1	5	13	8	1	5	11	19	2	5	3	6	6	1	5	12	0	20	128
sp|Q8NH64|O51A7_HUMAN Olfactory receptor 51A7 OS=Homo sapiens (Human) OX=9606 GN=OR51A7 PE=2 SV=1	21	10	13	6	11	4	8	10	11	32	54	14	16	18	14	24	14	2	10	20	0	20	312
sp|P51172|SCNND_HUMAN Amiloride-sensitive sodium channel subunit delta OS=Homo sapiens (Human) OX=9606 GN=SCNN1D PE=1 SV=3	61	62	12	20	30	35	38	74	39	14	97	12	8	22	72	76	47	21	20	42	0	20	802
sp|P11310|ACADM_HUMAN Medium-chain specific acyl-CoA dehydrogenase, mitochondrial OS=Homo sapiens (Human) OX=9606 GN=ACADM PE=1 SV=1	48	26	16	18	8	20	32	41	5	28	27	29	13	18	15	14	22	5	15	21	0	20	421
sp|P98168|ZXDA_HUMAN Zinc finger X-linked protein ZXDA OS=Homo sapiens (Human) OX=9606 GN=ZXDA PE=1 SV=2	73	37	22	34	27	37	40	78	32	14	79	37	10	37	70	79	47	5	6	35	0	20	799
sp|Q68D51|DEN2C_HUMAN DENN domain-containing protein 2C OS=Homo sapiens (Human) OX=9606 GN=DENND2C PE=1 SV=2	31	57	39	41	23	40	82	41	19	46	92	81	16	44	62	84	42	10	28	50	0	20	928
sp|O95786|DDX58_HUMAN Antiviral innate immune response receptor RIG-I OS=Homo sapiens (Human) OX=9606 GN=DDX58 PE=1 SV=2	51	38	40	49	26	47	85	40	18	70	87	85	20	47	38	52	46	10	30	46	0	20	925
sp|P49146|NPY2R_HUMAN Neuropeptide Y receptor type 2 OS=Homo sapiens (Human) OX=9606 GN=NPY2R PE=1 SV=1	26	13	14	12	8	11	22	17	10	33	46	20	8	17	17	28	23	6	14	36	0	20	381
sp|O14753|OVOL1_HUMAN Putative transcription factor Ovo-like 1 OS=Homo sapiens (Human) OX=9606 GN=OVOL1 PE=2 SV=3	11	18	6	12	16	11	15	14	14	2	26	21	7	8	21	22	15	1	9	18	0	20	267
sp|Q495C1|RN212_HUMAN Probable E3 SUMO-protein ligase RNF212 OS=Homo sapiens (Human) OX=9606 GN=RNF212 PE=2 SV=1	17	19	5	9	17	14	16	12	9	15	29	18	6	18	23	34	15	3	4	14	0	20	297
sp|H0YL09|U2Q2L_HUMAN Putative ubiquitin-conjugating enzyme E2Q2-like protein OS=Homo sapiens (Human) OX=9606 GN=UBE2Q2L PE=5 SV=1	3	8	4	5	6	6	13	6	0	6	15	8	5	4	10	16	5	3	1	7	0	19	131
sp|Q6UXN9|WDR82_HUMAN WD repeat-containing protein 82 OS=Homo sapiens (Human) OX=9606 GN=WDR82 PE=1 SV=1	15	13	14	26	7	6	9	22	7	20	24	23	9	21	12	31	19	4	11	20	0	20	313
sp|Q969H4|CNKR1_HUMAN Connector enhancer of kinase suppressor of ras 1 OS=Homo sapiens (Human) OX=9606 GN=CNKSR1 PE=1 SV=1	43	44	13	39	15	46	59	48	21	19	92	25	7	16	66	68	34	14	10	41	0	20	720
sp|Q8NGS6|O13C3_HUMAN Olfactory receptor 13C3 OS=Homo sapiens (Human) OX=9606 GN=OR13C3 PE=2 SV=2	24	8	16	10	10	7	7	17	6	35	48	16	17	27	11	30	15	1	15	27	0	20	347
sp|P16233|LIPP_HUMAN Pancreatic triacylglycerol lipase OS=Homo sapiens (Human) OX=9606 GN=PNLIP PE=1 SV=1	25	18	31	26	14	12	21	45	11	25	32	25	5	28	26	34	27	8	15	37	0	20	465
sp|Q96AH8|RAB7B_HUMAN Ras-related protein Rab-7b OS=Homo sapiens (Human) OX=9606 GN=RAB7B PE=2 SV=1	11	10	5	13	4	10	12	12	3	16	21	14	5	7	6	16	10	3	7	14	0	20	199
sp|Q9BXA5|SUCR1_HUMAN Succinate receptor 1 OS=Homo sapiens (Human) OX=9606 GN=SUCNR1 PE=1 SV=2	19	14	24	8	7	7	9	12	6	29	52	12	9	25	12	23	15	7	20	24	0	20	334
sp|Q15181|IPYR_HUMAN Inorganic pyrophosphatase OS=Homo sapiens (Human) OX=9606 GN=PPA1 PE=1 SV=2	22	9	16	28	8	4	17	17	8	21	12	28	5	13	20	11	13	7	10	20	0	20	289
sp|Q8IZT8|HS3S5_HUMAN Heparan sulfate glucosamine 3-O-sulfotransferase 5 OS=Homo sapiens (Human) OX=9606 GN=HS3ST5 PE=1 SV=1	17	25	15	9	4	18	23	19	8	25	40	29	4	20	20	14	17	4	16	19	0	20	346
sp|O75054|IGSF3_HUMAN Immunoglobulin superfamily member 3 OS=Homo sapiens (Human) OX=9606 GN=IGSF3 PE=2 SV=3	67	82	40	52	20	64	98	66	26	51	98	46	13	46	62	120	75	28	38	102	0	20	1194
sp|P16298|PP2BB_HUMAN Serine/threonine-protein phosphatase 2B catalytic subunit beta isoform OS=Homo sapiens (Human) OX=9606 GN=PPP3CB PE=1 SV=2	39	32	26	26	12	15	42	32	15	27	48	22	13	29	39	29	25	4	17	32	0	20	524
sp|P48764|SL9A3_HUMAN Sodium/hydrogen exchanger 3 OS=Homo sapiens (Human) OX=9606 GN=SLC9A3 PE=1 SV=2	59	48	26	36	6	24	47	57	19	45	103	34	17	50	37	66	45	11	23	81	0	20	834
sp|P01213|PDYN_HUMAN Proenkephalin-B OS=Homo sapiens (Human) OX=9606 GN=PDYN PE=1 SV=1	15	16	6	14	7	10	23	23	1	4	33	20	5	12	12	25	10	3	8	7	0	20	254
sp|Q8TF50|ZN526_HUMAN Zinc finger protein 526 OS=Homo sapiens (Human) OX=9606 GN=ZNF526 PE=2 SV=2	66	45	11	17	31	39	64	44	38	8	58	16	17	21	67	46	44	4	9	25	0	20	670
sp|Q86YQ2|LATH_HUMAN Putative BPIFA4P protein OS=Homo sapiens (Human) OX=9606 GN=BPIFA4P PE=5 SV=1	10	5	9	5	2	16	8	12	1	9	31	6	3	7	10	15	12	2	1	15	0	20	179
sp|Q99873|ANM1_HUMAN Protein arginine N-methyltransferase 1 OS=Homo sapiens (Human) OX=9606 GN=PRMT1 PE=1 SV=3	25	14	15	27	11	7	28	17	9	23	27	27	13	18	12	20	23	5	19	31	0	20	371
sp|Q96DR4|STAR4_HUMAN StAR-related lipid transfer protein 4 OS=Homo sapiens (Human) OX=9606 GN=STARD4 PE=1 SV=1	9	10	9	16	6	6	12	13	3	12	20	12	5	8	9	14	13	6	10	12	0	20	205
sp|Q7L8S5|OTU6A_HUMAN OTU domain-containing protein 6A OS=Homo sapiens (Human) OX=9606 GN=OTUD6A PE=1 SV=1	22	25	6	15	3	17	32	12	8	15	27	19	11	9	12	21	9	1	9	15	0	20	288
sp|Q7Z2E3|APTX_HUMAN Aprataxin OS=Homo sapiens (Human) OX=9606 GN=APTX PE=1 SV=2	15	20	11	15	7	22	26	20	17	16	32	33	10	7	18	28	10	7	8	34	0	20	356
sp|Q8N983|RM43_HUMAN 39S ribosomal protein L43, mitochondrial OS=Homo sapiens (Human) OX=9606 GN=MRPL43 PE=1 SV=1	17	19	6	10	5	10	9	12	4	10	19	4	2	7	22	21	12	2	3	21	0	20	215
sp|Q96EL3|RM53_HUMAN 39S ribosomal protein L53, mitochondrial OS=Homo sapiens (Human) OX=9606 GN=MRPL53 PE=1 SV=1	13	11	3	7	3	3	5	9	4	3	10	4	3	5	4	8	7	0	0	10	0	18	112
sp|Q5SZD4|GLYL3_HUMAN Glycine N-acyltransferase-like protein 3 OS=Homo sapiens (Human) OX=9606 GN=GLYATL3 PE=2 SV=3	18	18	16	14	8	12	12	12	7	10	37	16	4	15	14	26	15	4	10	20	0	20	288
sp|Q9Y2G8|DJC16_HUMAN DnaJ homolog subfamily C member 16 OS=Homo sapiens (Human) OX=9606 GN=DNAJC16 PE=2 SV=3	40	42	30	40	9	32	60	36	23	41	89	54	8	49	34	65	34	12	36	48	0	20	782
sp|Q9P2J5|SYLC_HUMAN Leucine--tRNA ligase, cytoplasmic OS=Homo sapiens (Human) OX=9606 GN=LARS PE=1 SV=2	68	48	43	68	21	44	93	71	25	62	112	111	40	52	60	63	58	21	42	74	0	20	1176
sp|Q8TEZ7|PAQR8_HUMAN Membrane progestin receptor beta OS=Homo sapiens (Human) OX=9606 GN=PAQR8 PE=2 SV=1	36	18	2	9	14	16	13	15	16	14	49	11	4	27	18	27	16	8	20	21	0	20	354
sp|A1L453|PRS38_HUMAN Serine protease 38 OS=Homo sapiens (Human) OX=9606 GN=PRSS38 PE=2 SV=2	26	10	12	8	11	10	15	30	10	16	40	8	11	4	26	24	12	11	12	30	0	20	326
sp|Q16774|KGUA_HUMAN Guanylate kinase OS=Homo sapiens (Human) OX=9606 GN=GUK1 PE=1 SV=2	17	14	7	10	1	11	16	14	4	10	18	10	4	6	9	16	9	0	5	16	0	19	197
sp|Q16533|SNPC1_HUMAN snRNA-activating protein complex subunit 1 OS=Homo sapiens (Human) OX=9606 GN=SNAPC1 PE=1 SV=1	21	26	16	23	4	18	29	13	11	14	34	43	12	18	12	27	17	4	8	18	0	20	368
sp|Q9BSE2|TMM79_HUMAN Transmembrane protein 79 OS=Homo sapiens (Human) OX=9606 GN=TMEM79 PE=1 SV=1	32	29	4	16	10	10	33	31	3	12	50	6	7	19	41	28	20	7	13	23	0	20	394
sp|Q9BQ67|GRWD1_HUMAN Glutamate-rich WD repeat-containing protein 1 OS=Homo sapiens (Human) OX=9606 GN=GRWD1 PE=1 SV=1	38	28	7	28	7	22	43	37	16	12	41	11	10	15	29	30	25	12	5	30	0	20	446
sp|O00370|LORF2_HUMAN LINE-1 retrotransposable element ORF2 protein OS=Homo sapiens (Human) OX=9606 GN=- PE=1 SV=1	59	62	76	62	19	55	72	46	27	133	118	152	27	47	51	69	91	30	43	36	0	20	1275
tr|M0QZD8|M0QZD8_HUMAN Uncharacterized protein OS=Homo sapiens (Human) OX=9606 GN=LOC400499 PE=4 SV=3	300	225	78	116	63	204	186	266	117	57	487	85	49	86	168	280	169	67	52	211	0	20	3266
sp|Q9GZL7|WDR12_HUMAN Ribosome biogenesis protein WDR12 OS=Homo sapiens (Human) OX=9606 GN=WDR12 PE=1 SV=2	21	15	12	32	9	10	28	22	14	23	39	32	10	9	13	49	30	16	10	29	0	20	423
sp|Q8NHZ7|MB3L2_HUMAN Methyl-CpG-binding domain protein 3-like 2 OS=Homo sapiens (Human) OX=9606 GN=MBD3L2 PE=2 SV=3	23	29	2	5	4	11	11	16	5	5	23	10	7	4	21	14	8	1	1	8	0	20	208
sp|P15813|CD1D_HUMAN Antigen-presenting glycoprotein CD1d OS=Homo sapiens (Human) OX=9606 GN=CD1D PE=1 SV=1	20	16	9	11	7	24	16	27	6	8	46	14	4	16	16	31	18	16	7	23	0	20	335
sp|Q5GAN4|RNS12_HUMAN Probable inactive ribonuclease-like protein 12 OS=Homo sapiens (Human) OX=9606 GN=RNASE12 PE=2 SV=1	5	8	6	7	8	5	10	4	7	13	10	8	5	8	9	6	7	1	6	14	0	20	147
sp|P52435|RPB11_HUMAN DNA-directed RNA polymerase II subunit RPB11-a OS=Homo sapiens (Human) OX=9606 GN=POLR2J PE=1 SV=1	7	3	6	6	1	5	11	4	3	12	12	11	1	7	8	5	8	0	2	5	0	19	117
sp|Q9BZI1|IRX2_HUMAN Iroquois-class homeodomain protein IRX-2 OS=Homo sapiens (Human) OX=9606 GN=IRX2 PE=1 SV=2	70	18	12	26	7	12	30	48	8	6	37	24	6	6	52	45	28	4	26	6	0	20	471
sp|Q8TCU3|S7A13_HUMAN Solute carrier family 7 member 13 OS=Homo sapiens (Human) OX=9606 GN=SLC7A13 PE=2 SV=1	32	14	13	8	11	12	14	27	4	45	74	19	7	32	23	46	24	10	18	37	0	20	470
sp|Q12765|SCRN1_HUMAN Secernin-1 OS=Homo sapiens (Human) OX=9606 GN=SCRN1 PE=1 SV=2	35	20	9	27	11	15	45	25	9	20	29	21	9	20	23	31	20	7	11	27	0	20	414
sp|A0A1B0GVY4|SIM31_HUMAN Small integral membrane protein 31 OS=Homo sapiens (Human) OX=9606 GN=SMIM31 PE=3 SV=1	4	3	3	2	1	0	14	1	2	4	7	9	2	4	2	5	4	0	2	2	0	18	71
sp|P0DN87|CGB7_HUMAN Choriogonadotropin subunit beta 7 OS=Homo sapiens (Human) OX=9606 GN=CGB7 PE=2 SV=1	10	13	4	6	12	6	5	11	1	5	19	3	5	3	21	14	11	1	3	12	0	20	165
sp|Q96MW7|TIGD1_HUMAN Tigger transposable element-derived protein 1 OS=Homo sapiens (Human) OX=9606 GN=TIGD1 PE=1 SV=1	48	31	22	27	3	20	53	21	8	32	53	53	21	27	26	52	40	9	16	29	0	20	591
sp|Q16875|F263_HUMAN 6-phosphofructo-2-kinase/fructose-2,6-bisphosphatase 3 OS=Homo sapiens (Human) OX=9606 GN=PFKFB3 PE=1 SV=1	32	39	21	26	14	21	41	20	12	24	46	34	12	14	32	40	24	4	25	39	0	20	520
sp|Q5VWJ9|SNX30_HUMAN Sorting nexin-30 OS=Homo sapiens (Human) OX=9606 GN=SNX30 PE=1 SV=1	29	28	10	34	6	14	39	23	7	20	48	31	12	16	25	29	24	4	15	23	0	20	437
sp|Q8NBI2|CYAC3_HUMAN Cytochrome b ascorbate-dependent protein 3 OS=Homo sapiens (Human) OX=9606 GN=CYB561A3 PE=1 SV=1	18	8	7	2	3	4	4	20	9	11	40	6	9	19	11	21	10	11	9	20	0	20	242
sp|Q99729|ROAA_HUMAN Heterogeneous nuclear ribonucleoprotein A/B OS=Homo sapiens (Human) OX=9606 GN=HNRNPAB PE=1 SV=2	20	15	17	15	2	18	27	57	4	10	9	29	7	13	17	19	13	4	21	15	0	20	332
sp|Q8NCN5|PDPR_HUMAN Pyruvate dehydrogenase phosphatase regulatory subunit, mitochondrial OS=Homo sapiens (Human) OX=9606 GN=PDPR PE=1 SV=2	56	45	31	46	15	41	57	68	24	44	88	43	30	36	38	61	45	18	37	56	0	20	879
sp|P06315|KV502_HUMAN Immunoglobulin kappa variable 5-2 OS=Homo sapiens (Human) OX=9606 GN=IGKV5-2 PE=1 SV=1	9	2	5	9	2	7	5	7	2	9	9	3	3	7	7	10	10	2	4	3	0	20	115
sp|P61587|RND3_HUMAN Rho-related GTP-binding protein RhoE OS=Homo sapiens (Human) OX=9606 GN=RND3 PE=1 SV=1	16	13	13	16	9	10	12	7	4	11	18	21	6	7	11	25	16	2	7	20	0	20	244
sp|Q8IWA5|CTL2_HUMAN Choline transporter-like protein 2 OS=Homo sapiens (Human) OX=9606 GN=SLC44A2 PE=1 SV=3	58	36	26	26	27	16	27	45	11	56	85	35	17	54	29	33	32	10	37	46	0	20	706
sp|Q96SE0|ABHD1_HUMAN Protein ABHD1 OS=Homo sapiens (Human) OX=9606 GN=ABHD1 PE=1 SV=2	37	22	11	21	9	29	15	22	10	18	60	7	2	18	26	26	24	7	16	25	0	20	405
sp|Q7L8W6|DPH6_HUMAN Diphthine--ammonia ligase OS=Homo sapiens (Human) OX=9606 GN=DPH6 PE=1 SV=3	20	14	10	17	6	11	22	15	7	17	31	15	8	5	8	16	8	1	16	20	0	20	267
sp|O15522|NKX28_HUMAN Homeobox protein Nkx-2.8 OS=Homo sapiens (Human) OX=9606 GN=NKX2-8 PE=2 SV=2	32	23	2	9	4	13	15	18	5	1	26	8	1	6	28	22	7	4	5	10	0	20	239
sp|P35452|HXD12_HUMAN Homeobox protein Hox-D12 OS=Homo sapiens (Human) OX=9606 GN=HOXD12 PE=1 SV=3	39	19	11	7	4	15	13	24	0	4	28	16	3	10	28	17	10	3	10	9	0	19	270
sp|P02786|TFR1_HUMAN Transferrin receptor protein 1 OS=Homo sapiens (Human) OX=9606 GN=TFRC PE=1 SV=2	60	33	42	43	8	23	46	53	13	32	71	50	14	46	31	56	44	11	28	56	0	20	760
sp|P18146|EGR1_HUMAN Early growth response protein 1 OS=Homo sapiens (Human) OX=9606 GN=EGR1 PE=1 SV=1	43	22	16	18	8	26	19	34	11	16	31	19	11	25	70	95	44	1	17	17	0	20	543
sp|Q9UL40|ZN346_HUMAN Zinc finger protein 346 OS=Homo sapiens (Human) OX=9606 GN=ZNF346 PE=1 SV=1	24	13	10	13	11	24	17	16	12	9	21	31	8	7	15	22	15	1	9	16	0	20	294
sp|Q9ULL8|SHRM4_HUMAN Protein Shroom4 OS=Homo sapiens (Human) OX=9606 GN=SHROOM4 PE=1 SV=3	102	87	51	52	40	100	139	101	57	35	135	80	24	38	120	184	59	15	27	47	0	20	1493
sp|Q8NGR9|OR1N2_HUMAN Olfactory receptor 1N2 OS=Homo sapiens (Human) OX=9606 GN=OR1N2 PE=2 SV=2	21	11	9	8	11	9	9	20	9	18	56	8	16	21	17	27	20	4	15	21	0	20	330
sp|Q8IX21|SLF2_HUMAN SMC5-SMC6 complex localization factor protein 2 OS=Homo sapiens (Human) OX=9606 GN=SLF2 PE=1 SV=2	52	66	50	62	16	49	89	60	40	58	116	109	20	37	73	144	55	9	21	47	0	20	1173
sp|Q96I36|COX14_HUMAN Cytochrome c oxidase assembly protein COX14 OS=Homo sapiens (Human) OX=9606 GN=COX14 PE=1 SV=1	4	4	0	1	1	5	2	5	1	2	4	3	4	2	1	4	5	1	5	3	0	19	57
sp|Q9UNI6|DUS12_HUMAN Dual specificity protein phosphatase 12 OS=Homo sapiens (Human) OX=9606 GN=DUSP12 PE=1 SV=1	29	17	5	14	11	19	25	25	7	13	35	20	10	13	20	26	15	5	10	21	0	20	340
sp|O60243|H6ST1_HUMAN Heparan-sulfate 6-O-sulfotransferase 1 OS=Homo sapiens (Human) OX=9606 GN=HS6ST1 PE=1 SV=5	20	47	11	25	12	17	29	27	8	10	44	18	11	20	24	18	24	7	19	20	0	20	411
sp|Q9NSN8|SNTG1_HUMAN Gamma-1-syntrophin OS=Homo sapiens (Human) OX=9606 GN=SNTG1 PE=1 SV=1	37	25	19	28	21	27	31	27	10	29	53	30	5	28	19	42	35	9	11	31	0	20	517
sp|Q96PU8|QKI_HUMAN Protein quaking OS=Homo sapiens (Human) OX=9606 GN=QKI PE=1 SV=1	33	20	14	14	2	11	27	21	6	19	33	24	13	5	33	11	22	1	11	21	0	20	341
sp|O60412|OR7C2_HUMAN Olfactory receptor 7C2 OS=Homo sapiens (Human) OX=9606 GN=OR7C2 PE=3 SV=4	14	10	12	9	11	7	7	20	7	22	50	8	15	24	11	33	26	1	11	21	0	20	319
sp|P86790|CCZ1B_HUMAN Vacuolar fusion protein CCZ1 homolog B OS=Homo sapiens (Human) OX=9606 GN=CCZ1B PE=1 SV=1	25	23	28	26	8	20	38	21	11	30	47	35	16	33	24	29	19	4	18	27	0	20	482
sp|P36551|HEM6_HUMAN Oxygen-dependent coproporphyrinogen-III oxidase, mitochondrial OS=Homo sapiens (Human) OX=9606 GN=CPOX PE=1 SV=3	35	36	8	21	14	18	31	52	14	12	39	22	9	20	26	31	19	11	9	27	0	20	454
sp|O43312|MTSS1_HUMAN Protein MTSS 1 OS=Homo sapiens (Human) OX=9606 GN=MTSS1 PE=1 SV=2	53	45	16	40	10	42	50	46	15	32	53	41	19	16	73	101	48	6	16	33	0	20	755
sp|Q7L985|LIGO2_HUMAN Leucine-rich repeat and immunoglobulin-like domain-containing nogo receptor-interacting protein 2 OS=Homo sapiens (Human) OX=9606 GN=LINGO2 PE=2 SV=1	32	32	41	26	14	19	29	33	16	36	89	28	14	33	27	47	37	5	13	35	0	20	606
sp|Q8IVU1|IGDC3_HUMAN Immunoglobulin superfamily DCC subclass member 3 OS=Homo sapiens (Human) OX=9606 GN=IGDCC3 PE=2 SV=2	79	53	23	24	16	41	49	74	19	34	81	21	6	18	77	63	51	9	14	62	0	20	814
sp|Q9UFW8|CGBP1_HUMAN CGG triplet repeat-binding protein 1 OS=Homo sapiens (Human) OX=9606 GN=CGGBP1 PE=1 SV=2	12	12	10	8	5	8	12	7	6	4	15	14	2	6	8	12	10	0	3	13	0	19	167
sp|A8MY62|BLML_HUMAN Putative beta-lactamase-like 1 OS=Homo sapiens (Human) OX=9606 GN=LACTBL1 PE=2 SV=2	58	37	12	23	4	14	22	42	15	8	75	12	8	20	47	24	23	7	18	31	0	20	500
sp|Q3MIS6|ZN528_HUMAN Zinc finger protein 528 OS=Homo sapiens (Human) OX=9606 GN=ZNF528 PE=2 SV=1	23	36	26	18	40	31	41	35	46	27	43	69	5	26	24	59	31	2	21	25	0	20	628
sp|Q16864|VATF_HUMAN V-type proton ATPase subunit F OS=Homo sapiens (Human) OX=9606 GN=ATP6V1F PE=1 SV=2	10	9	6	10	0	4	9	9	4	13	11	5	3	5	4	3	6	0	2	6	0	18	119
sp|P07101|TY3H_HUMAN Tyrosine 3-monooxygenase OS=Homo sapiens (Human) OX=9606 GN=TH PE=1 SV=5	62	40	3	29	7	23	43	31	15	16	51	22	4	27	39	39	24	4	17	32	0	20	528
sp|Q0P6D6|CCD15_HUMAN Coiled-coil domain-containing protein 15 OS=Homo sapiens (Human) OX=9606 GN=CCDC15 PE=2 SV=2	46	52	38	73	13	102	76	36	23	44	98	84	14	36	62	51	29	4	29	41	0	20	951
sp|A6NGD5|ZSA5C_HUMAN Zinc finger and SCAN domain-containing protein 5C OS=Homo sapiens (Human) OX=9606 GN=ZSCAN5C PE=3 SV=1	26	35	16	20	19	31	45	29	19	8	39	35	14	15	42	42	27	3	5	26	0	20	496
sp|Q13404|UB2V1_HUMAN Ubiquitin-conjugating enzyme E2 variant 1 OS=Homo sapiens (Human) OX=9606 GN=UBE2V1 PE=1 SV=2	5	9	9	5	2	5	12	13	0	8	11	9	7	3	11	10	8	3	5	12	0	19	147
sp|Q8N1S5|S39AB_HUMAN Zinc transporter ZIP11 OS=Homo sapiens (Human) OX=9606 GN=SLC39A11 PE=2 SV=3	52	11	7	8	0	9	15	43	3	16	41	8	11	23	19	27	13	6	6	24	0	19	342
sp|P51151|RAB9A_HUMAN Ras-related protein Rab-9A OS=Homo sapiens (Human) OX=9606 GN=RAB9A PE=1 SV=1	12	11	9	16	5	8	13	11	4	8	15	12	3	14	6	18	13	3	6	14	0	20	201
sp|Q6ZVD8|PHLP2_HUMAN PH domain leucine-rich repeat-containing protein phosphatase 2 OS=Homo sapiens (Human) OX=9606 GN=PHLPP2 PE=1 SV=3	65	65	70	66	40	58	93	73	39	51	192	53	27	35	66	121	93	7	29	80	0	20	1323
sp|Q96B01|R51A1_HUMAN RAD51-associated protein 1 OS=Homo sapiens (Human) OX=9606 GN=RAD51AP1 PE=1 SV=1	24	15	14	28	4	11	24	11	5	9	25	47	4	6	27	49	16	1	3	29	0	20	352
sp|Q7Z2H8|S36A1_HUMAN Proton-coupled amino acid transporter 1 OS=Homo sapiens (Human) OX=9606 GN=SLC36A1 PE=1 SV=1	23	16	22	13	13	13	16	30	10	43	68	11	12	33	26	38	26	5	19	39	0	20	476
sp|Q8N2G6|ZCH24_HUMAN Zinc finger CCHC domain-containing protein 24 OS=Homo sapiens (Human) OX=9606 GN=ZCCHC24 PE=1 SV=1	17	11	10	9	11	14	12	17	9	5	24	19	3	8	20	23	7	3	12	7	0	20	241
sp|O00533|NCHL1_HUMAN Neural cell adhesion molecule L1-like protein OS=Homo sapiens (Human) OX=9606 GN=CHL1 PE=1 SV=4	60	48	64	58	19	46	100	86	31	75	96	77	15	43	84	89	77	20	40	80	0	20	1208
sp|P05026|AT1B1_HUMAN Sodium/potassium-transporting ATPase subunit beta-1 OS=Homo sapiens (Human) OX=9606 GN=ATP1B1 PE=1 SV=1	8	15	14	15	7	12	25	26	1	19	24	31	5	18	20	13	12	4	18	16	0	20	303
sp|Q8IY17|PLPL6_HUMAN Neuropathy target esterase OS=Homo sapiens (Human) OX=9606 GN=PNPLA6 PE=1 SV=3	108	108	23	73	26	60	81	110	28	56	150	49	31	40	91	109	77	14	34	107	0	20	1375
sp|Q86X29|LSR_HUMAN Lipolysis-stimulated lipoprotein receptor OS=Homo sapiens (Human) OX=9606 GN=LSR PE=1 SV=4	61	65	15	43	20	25	30	53	12	15	44	13	9	13	61	59	30	12	29	40	0	20	649
sp|Q4G1C9|GRPL2_HUMAN GLIPR1-like protein 2 OS=Homo sapiens (Human) OX=9606 GN=GLIPR1L2 PE=2 SV=2	19	21	15	13	15	10	47	18	7	21	30	18	12	16	16	15	14	9	11	17	0	20	344
sp|P06576|ATPB_HUMAN ATP synthase subunit beta, mitochondrial OS=Homo sapiens (Human) OX=9606 GN=ATP5F1B PE=1 SV=3	59	26	9	27	0	24	37	49	10	36	48	23	14	16	32	26	33	0	13	47	0	18	529
sp|A6NJT0|UNC4_HUMAN Homeobox protein unc-4 homolog OS=Homo sapiens (Human) OX=9606 GN=UNCX PE=3 SV=1	86	27	7	24	9	13	30	65	15	4	38	25	6	17	84	41	14	3	5	18	0	20	531
sp|O14791|APOL1_HUMAN Apolipoprotein L1 OS=Homo sapiens (Human) OX=9606 GN=APOL1 PE=1 SV=5	36	21	19	19	1	16	34	29	6	19	50	25	9	11	13	29	19	7	7	28	0	20	398
sp|P10600|TGFB3_HUMAN Transforming growth factor beta-3 proprotein OS=Homo sapiens (Human) OX=9606 GN=TGFB3 PE=1 SV=1	16	29	23	17	14	15	33	23	17	19	45	25	9	14	24	23	24	4	13	25	0	20	412
sp|Q13426|XRCC4_HUMAN DNA repair protein XRCC4 OS=Homo sapiens (Human) OX=9606 GN=XRCC4 PE=1 SV=2	21	19	17	22	5	13	42	12	6	17	31	26	7	12	10	34	18	3	6	15	0	20	336
sp|Q6UXK5|LRRN1_HUMAN Leucine-rich repeat neuronal protein 1 OS=Homo sapiens (Human) OX=9606 GN=LRRN1 PE=1 SV=1	38	23	58	36	14	33	40	22	17	46	89	40	21	20	31	61	51	8	22	46	0	20	716
sp|Q9Y4H2|IRS2_HUMAN Insulin receptor substrate 2 OS=Homo sapiens (Human) OX=9606 GN=IRS2 PE=1 SV=2	150	82	31	49	21	40	56	158	34	23	97	39	23	26	178	177	53	7	37	57	0	20	1338
sp|Q6ZRV3|CC074_HUMAN Putative uncharacterized protein encoded by LINC00696 OS=Homo sapiens (Human) OX=9606 GN=LINC00696 PE=5 SV=1	11	8	2	7	7	5	12	30	2	2	16	5	4	4	8	18	8	6	1	7	0	20	163
sp|Q5CZA5|ZN805_HUMAN Zinc finger protein 805 OS=Homo sapiens (Human) OX=9606 GN=ZNF805 PE=2 SV=3	24	35	17	21	35	30	58	51	38	24	42	47	11	28	29	49	41	5	18	24	0	20	627
sp|C9J6K1|CS081_HUMAN Putative uncharacterized protein C19orf81 OS=Homo sapiens (Human) OX=9606 GN=C19orf81 PE=4 SV=1	16	22	4	7	5	9	19	11	5	7	27	4	9	5	15	12	8	1	3	9	0	20	198
sp|Q66K41|Z385C_HUMAN Zinc finger protein 385C OS=Homo sapiens (Human) OX=9606 GN=ZNF385C PE=1 SV=3	59	24	8	6	10	20	12	33	18	8	42	27	6	12	57	40	22	1	3	16	0	20	424
sp|Q8NDT2|RB15B_HUMAN Putative RNA-binding protein 15B OS=Homo sapiens (Human) OX=9606 GN=RBM15B PE=1 SV=3	85	96	19	45	5	31	57	93	32	19	80	42	10	18	68	90	35	5	29	31	0	20	890
sp|P43003|EAA1_HUMAN Excitatory amino acid transporter 1 OS=Homo sapiens (Human) OX=9606 GN=SLC1A3 PE=1 SV=1	41	24	26	16	3	15	33	42	5	49	56	28	26	25	19	24	40	3	12	55	0	20	542
sp|O95400|CD2B2_HUMAN CD2 antigen cytoplasmic tail-binding protein 2 OS=Homo sapiens (Human) OX=9606 GN=CD2BP2 PE=1 SV=1	20	23	8	30	2	17	36	40	3	8	32	15	8	10	23	22	15	5	9	15	0	20	341
sp|Q9NZM3|ITSN2_HUMAN Intersectin-2 OS=Homo sapiens (Human) OX=9606 GN=ITSN2 PE=1 SV=3	96	83	75	68	19	122	157	89	24	71	189	150	45	57	88	141	86	28	40	69	0	20	1697
sp|O95196|CSPG5_HUMAN Chondroitin sulfate proteoglycan 5 OS=Homo sapiens (Human) OX=9606 GN=CSPG5 PE=1 SV=3	48	20	21	36	13	17	52	61	12	14	55	17	7	18	55	45	33	7	10	25	0	20	566
sp|Q03167|TGBR3_HUMAN Transforming growth factor beta receptor type 3 OS=Homo sapiens (Human) OX=9606 GN=TGFBR3 PE=1 SV=3	51	27	42	34	17	33	60	56	25	50	73	41	20	39	68	80	46	9	19	61	0	20	851
sp|Q9H3M7|TXNIP_HUMAN Thioredoxin-interacting protein OS=Homo sapiens (Human) OX=9606 GN=TXNIP PE=1 SV=1	17	20	13	22	11	13	25	24	4	22	28	28	13	14	27	34	20	4	13	39	0	20	391
sp|P41439|FOLR3_HUMAN Folate receptor gamma OS=Homo sapiens (Human) OX=9606 GN=FOLR3 PE=1 SV=2	21	13	15	10	16	11	14	13	7	7	17	13	8	7	13	23	12	12	7	6	0	20	245
sp|A0A1B0GUW6|SPEM3_HUMAN Uncharacterized protein SPEM3 OS=Homo sapiens (Human) OX=9606 GN=SPEM3 PE=3 SV=1	89	43	39	55	30	84	38	71	57	31	96	62	12	28	141	140	91	9	23	57	0	20	1196
sp|Q9Y496|KIF3A_HUMAN Kinesin-like protein KIF3A OS=Homo sapiens (Human) OX=9606 GN=KIF3A PE=1 SV=4	39	50	32	41	6	29	85	41	13	38	64	69	22	12	21	42	37	3	18	37	0	20	699
sp|Q8IUC6|TCAM1_HUMAN TIR domain-containing adapter molecule 1 OS=Homo sapiens (Human) OX=9606 GN=TICAM1 PE=1 SV=1	67	32	15	33	17	46	41	43	19	17	78	18	13	19	97	75	36	9	10	27	0	20	712
sp|Q496M5|PLK5_HUMAN Inactive serine/threonine-protein kinase PLK5 OS=Homo sapiens (Human) OX=9606 GN=PLK5 PE=1 SV=4	23	19	4	13	7	18	19	34	15	8	44	5	6	11	43	25	17	4	7	14	0	20	336
sp|Q8NHB1|OR2V1_HUMAN Olfactory receptor 2V1 OS=Homo sapiens (Human) OX=9606 GN=OR2V1 PE=3 SV=2	27	15	7	11	12	10	3	23	8	19	46	7	16	22	10	26	12	3	13	25	0	20	315
sp|C9JQL5|DSA2D_HUMAN Putative dispanin subfamily A member 2d OS=Homo sapiens (Human) OX=9606 GN=- PE=5 SV=1	9	4	8	1	3	4	3	6	7	11	12	6	5	7	10	9	10	2	3	13	0	20	133
sp|Q9NR22|ANM8_HUMAN Protein arginine N-methyltransferase 8 OS=Homo sapiens (Human) OX=9606 GN=PRMT8 PE=1 SV=2	21	16	15	25	10	10	27	18	12	23	26	33	16	19	18	25	22	5	19	34	0	20	394
sp|Q6QNK2|AGRD1_HUMAN Adhesion G-protein coupled receptor D1 OS=Homo sapiens (Human) OX=9606 GN=ADGRD1 PE=1 SV=1	63	27	34	23	18	27	35	56	36	44	98	34	18	44	37	102	54	19	34	71	0	20	874
sp|A0AVT1|UBA6_HUMAN Ubiquitin-like modifier-activating enzyme 6 OS=Homo sapiens (Human) OX=9606 GN=UBA6 PE=1 SV=1	72	36	43	59	23	40	77	54	31	67	103	76	18	54	56	71	70	12	25	65	0	20	1052
sp|Q92954|PRG4_HUMAN Proteoglycan 4 OS=Homo sapiens (Human) OX=9606 GN=PRG4 PE=1 SV=3	108	42	37	37	21	29	104	40	10	37	48	165	14	22	243	91	284	7	24	41	0	20	1404
sp|Q96HH6|TMM19_HUMAN Transmembrane protein 19 OS=Homo sapiens (Human) OX=9606 GN=TMEM19 PE=1 SV=1	23	8	16	11	5	6	9	31	2	26	43	16	8	16	15	33	20	11	9	28	0	20	336
sp|P07711|CATL1_HUMAN Cathepsin L1 OS=Homo sapiens (Human) OX=9606 GN=CTSL PE=1 SV=2	25	13	19	15	8	13	29	32	7	9	18	21	15	16	12	23	14	9	16	19	0	20	333
sp|Q8NGS8|O13C5_HUMAN Olfactory receptor 13C5 OS=Homo sapiens (Human) OX=9606 GN=OR13C5 PE=2 SV=1	15	11	14	10	9	4	11	13	6	31	46	14	14	22	13	26	24	2	10	23	0	20	318
tr|A0A1W2PRP0|A0A1W2PRP0_HUMAN Fork-head domain-containing protein OS=Homo sapiens (Human) OX=9606 GN=ENSG00000248767 PE=4 SV=1	20	23	10	12	4	8	12	24	4	8	15	9	4	10	27	19	4	3	13	4	0	20	233
sp|Q9ULB4|CADH9_HUMAN Cadherin-9 OS=Homo sapiens (Human) OX=9606 GN=CDH9 PE=2 SV=2	44	36	42	78	6	29	46	49	15	59	61	44	19	31	40	49	58	6	31	46	0	20	789
sp|Q5VZ52|MORN5_HUMAN MORN repeat-containing protein 5 OS=Homo sapiens (Human) OX=9606 GN=MORN5 PE=2 SV=1	6	10	7	14	3	2	11	19	4	8	8	11	6	6	7	4	11	3	16	5	0	20	161
sp|P59551|T2R60_HUMAN Taste receptor type 2 member 60 OS=Homo sapiens (Human) OX=9606 GN=TAS2R60 PE=2 SV=1	22	15	9	6	8	6	4	15	9	20	49	14	11	28	14	27	18	11	9	23	0	20	318
sp|Q5JSQ8|KHDCL_HUMAN Putative KHDC1-like protein OS=Homo sapiens (Human) OX=9606 GN=KHDC1L PE=5 SV=1	5	6	2	7	4	6	9	7	6	3	16	4	6	5	8	9	11	3	2	9	0	20	128
sp|Q9H3H5|GPT_HUMAN UDP-N-acetylglucosamine--dolichyl-phosphate N-acetylglucosaminephosphotransferase OS=Homo sapiens (Human) OX=9606 GN=DPAGT1 PE=1 SV=2	22	14	17	10	11	12	14	25	12	33	69	13	11	39	20	21	22	3	12	28	0	20	408
sp|Q9Y5P4|CERT_HUMAN Ceramide transfer protein OS=Homo sapiens (Human) OX=9606 GN=CERT PE=1 SV=1	37	34	29	45	12	23	54	33	19	29	38	40	10	22	24	58	35	14	19	49	0	20	624
sp|Q6XUX3|DUSTY_HUMAN Dual serine/threonine and tyrosine protein kinase OS=Homo sapiens (Human) OX=9606 GN=DSTYK PE=1 SV=2	48	61	33	47	26	49	73	63	30	46	118	48	20	28	39	64	39	13	23	61	0	20	929
sp|Q9GZT4|SRR_HUMAN Serine racemase OS=Homo sapiens (Human) OX=9606 GN=SRR PE=1 SV=1	33	10	13	14	8	15	20	22	6	25	29	21	5	7	20	24	20	3	9	36	0	20	340
sp|O14645|IDLC_HUMAN Axonemal dynein light intermediate polypeptide 1 OS=Homo sapiens (Human) OX=9606 GN=DNALI1 PE=1 SV=2	17	22	6	10	5	23	29	7	2	13	26	21	5	3	19	15	15	2	4	14	0	20	258
sp|P22570|ADRO_HUMAN NADPH:adrenodoxin oxidoreductase, mitochondrial OS=Homo sapiens (Human) OX=9606 GN=FDXR PE=1 SV=3	41	40	7	23	8	20	30	45	11	15	51	18	7	15	43	27	27	11	8	44	0	20	491
sp|P08575|PTPRC_HUMAN Receptor-type tyrosine-protein phosphatase C OS=Homo sapiens (Human) OX=9606 GN=PTPRC PE=1 SV=3	78	50	83	71	26	57	98	56	41	67	95	88	22	50	76	104	102	13	50	79	0	20	1306
sp|O95544|NADK_HUMAN NAD kinase OS=Homo sapiens (Human) OX=9606 GN=NADK PE=1 SV=1	33	21	15	21	12	19	31	29	13	24	34	24	14	17	26	40	23	5	10	35	0	20	446
sp|Q8N5Q1|F71E2_HUMAN Protein FAM71E2 OS=Homo sapiens (Human) OX=9606 GN=FAM71E2 PE=2 SV=3	90	49	11	30	11	51	56	46	21	24	88	61	18	16	117	97	55	20	6	55	0	20	922
sp|Q6UY01|LRC31_HUMAN Leucine-rich repeat-containing protein 31 OS=Homo sapiens (Human) OX=9606 GN=LRRC31 PE=2 SV=1	26	18	26	31	14	29	37	30	10	22	96	41	15	19	14	59	28	8	3	26	0	20	552
sp|Q9HCK0|ZBT26_HUMAN Zinc finger and BTB domain-containing protein 26 OS=Homo sapiens (Human) OX=9606 GN=ZBTB26 PE=1 SV=2	19	17	24	30	17	30	25	21	22	19	39	34	13	20	18	41	16	2	7	27	0	20	441
sp|Q7Z5H4|VN1R5_HUMAN Vomeronasal type-1 receptor 5 OS=Homo sapiens (Human) OX=9606 GN=VN1R5 PE=2 SV=2	17	11	11	11	9	15	5	14	13	33	52	17	10	36	16	33	18	5	9	22	0	20	357
sp|Q99574|NEUS_HUMAN Neuroserpin OS=Homo sapiens (Human) OX=9606 GN=SERPINI1 PE=1 SV=1	31	13	27	17	0	17	38	23	7	22	38	22	20	28	12	29	18	3	14	31	0	19	410
sp|P18754|RCC1_HUMAN Regulator of chromosome condensation OS=Homo sapiens (Human) OX=9606 GN=RCC1 PE=1 SV=1	25	20	11	19	8	20	25	55	12	8	37	24	12	13	18	38	19	4	9	44	0	20	421
sp|Q5JWR5|DOP1_HUMAN Protein dopey-1 OS=Homo sapiens (Human) OX=9606 GN=DOP1A PE=2 SV=1	140	105	100	116	39	140	164	100	69	139	311	129	67	92	110	261	135	26	66	156	0	20	2465
sp|O75064|DEN4B_HUMAN DENN domain-containing protein 4B OS=Homo sapiens (Human) OX=9606 GN=DENND4B PE=1 SV=4	125	105	23	46	35	73	101	109	36	33	200	38	20	45	160	130	59	20	43	95	0	20	1496
sp|Q9NZV8|KCND2_HUMAN Potassium voltage-gated channel subfamily D member 2 OS=Homo sapiens (Human) OX=9606 GN=KCND2 PE=1 SV=2	53	45	19	24	16	24	38	33	16	38	45	21	15	36	33	59	42	5	23	45	0	20	630
sp|Q6P087|RUSD3_HUMAN Mitochondrial mRNA pseudouridine synthase RPUSD3 OS=Homo sapiens (Human) OX=9606 GN=RPUSD3 PE=1 SV=3	28	33	5	11	6	24	16	29	10	4	57	13	4	9	27	22	18	2	4	29	0	20	351
sp|Q8NG98|OR7D4_HUMAN Olfactory receptor 7D4 OS=Homo sapiens (Human) OX=9606 GN=OR7D4 PE=2 SV=1	19	6	9	9	10	6	7	16	8	16	49	10	16	22	12	36	19	2	13	27	0	20	312
sp|P58872|RHBL3_HUMAN Rhomboid-related protein 3 OS=Homo sapiens (Human) OX=9606 GN=RHBDL3 PE=2 SV=1	35	21	11	12	6	15	21	27	15	15	51	12	12	19	25	28	13	9	17	40	0	20	404
sp|O95169|NDUB8_HUMAN NADH dehydrogenase [ubiquinone] 1 beta subcomplex subunit 8, mitochondrial OS=Homo sapiens (Human) OX=9606 GN=NDUFB8 PE=1 SV=1	11	14	7	12	2	7	10	14	6	2	11	6	12	5	20	7	5	7	14	14	0	20	186
sp|Q969P6|TOP1M_HUMAN DNA topoisomerase I, mitochondrial OS=Homo sapiens (Human) OX=9606 GN=TOP1MT PE=1 SV=1	50	59	19	30	10	29	57	30	13	21	52	52	11	25	24	27	27	10	17	38	0	20	601
sp|O95388|WISP1_HUMAN WNT1-inducible-signaling pathway protein 1 OS=Homo sapiens (Human) OX=9606 GN=WISP1 PE=1 SV=1	30	23	16	21	38	13	13	22	5	15	23	11	5	11	33	25	21	9	11	22	0	20	367
sp|P22079|PERL_HUMAN Lactoperoxidase OS=Homo sapiens (Human) OX=9606 GN=LPO PE=1 SV=2	50	49	32	40	16	32	34	42	13	27	84	37	14	33	51	53	40	14	19	32	0	20	712
sp|Q92759|TF2H4_HUMAN General transcription factor IIH subunit 4 OS=Homo sapiens (Human) OX=9606 GN=GTF2H4 PE=1 SV=1	32	31	11	15	3	32	26	31	12	16	69	16	12	24	23	36	22	8	12	31	0	20	462
sp|Q8NCU1|CC197_HUMAN Uncharacterized protein CCDC197 OS=Homo sapiens (Human) OX=9606 GN=CCDC197 PE=1 SV=2	12	9	1	7	4	10	16	10	4	4	14	12	3	3	4	12	6	2	3	7	0	20	143
sp|O43511|S26A4_HUMAN Pendrin OS=Homo sapiens (Human) OX=9606 GN=SLC26A4 PE=1 SV=1	59	30	28	34	12	31	40	50	6	72	87	40	12	40	32	57	44	6	24	76	0	20	780
sp|Q8N6N3|CA052_HUMAN UPF0690 protein C1orf52 OS=Homo sapiens (Human) OX=9606 GN=C1orf52 PE=1 SV=1	14	9	8	13	1	2	25	8	2	5	9	22	2	4	22	14	8	3	6	5	0	20	182
sp|Q7Z3Z4|PIWL4_HUMAN Piwi-like protein 4 OS=Homo sapiens (Human) OX=9606 GN=PIWIL4 PE=1 SV=2	48	50	39	42	23	43	37	38	14	52	87	52	24	31	37	76	53	11	34	61	0	20	852
sp|Q9NRJ1|MOST1_HUMAN Protein MOST-1 OS=Homo sapiens (Human) OX=9606 GN=C8orf17 PE=1 SV=1	8	8	0	3	3	1	6	8	5	2	10	3	3	1	7	9	9	7	2	4	0	19	99
sp|Q6L8H4|KRA51_HUMAN Keratin-associated protein 5-1 OS=Homo sapiens (Human) OX=9606 GN=KRTAP5-1 PE=2 SV=1	3	1	0	0	85	4	0	88	0	1	0	17	2	0	10	55	1	0	0	11	0	12	278
sp|O95096|NKX22_HUMAN Homeobox protein Nkx-2.2 OS=Homo sapiens (Human) OX=9606 GN=NKX2-2 PE=2 SV=1	29	17	8	14	1	19	18	18	6	4	23	16	4	7	25	24	15	4	10	11	0	20	273
sp|A0A087WXS9|TBC3I_HUMAN TBC1 domain family member 3I OS=Homo sapiens (Human) OX=9606 GN=TBC1D3I PE=3 SV=1	37	47	10	30	13	32	33	42	15	21	47	31	13	17	47	38	23	15	13	25	0	20	549
sp|P05060|SCG1_HUMAN Secretogranin-1 OS=Homo sapiens (Human) OX=9606 GN=CHGB PE=1 SV=2	39	55	29	39	2	36	116	48	27	7	42	47	9	14	34	58	24	10	21	20	0	20	677
sp|Q9BQE9|BCL7B_HUMAN B-cell CLL/lymphoma 7 protein family member B OS=Homo sapiens (Human) OX=9606 GN=BCL7B PE=1 SV=1	12	9	6	14	1	10	22	5	1	4	12	15	2	5	18	33	13	3	1	16	0	20	202
sp|Q6ZNQ3|LRC69_HUMAN Leucine-rich repeat-containing protein 69 OS=Homo sapiens (Human) OX=9606 GN=LRRC69 PE=2 SV=2	10	13	30	8	13	23	21	16	2	26	60	25	8	13	20	16	16	3	8	16	0	20	347
sp|P16885|PLCG2_HUMAN 1-phosphatidylinositol 4,5-bisphosphate phosphodiesterase gamma-2 OS=Homo sapiens (Human) OX=9606 GN=PLCG2 PE=1 SV=4	58	82	53	81	21	56	108	49	29	66	111	94	32	64	55	95	67	20	53	71	0	20	1265
sp|Q7Z3Y8|K1C27_HUMAN Keratin, type I cytoskeletal 27 OS=Homo sapiens (Human) OX=9606 GN=KRT27 PE=1 SV=2	37	22	27	20	11	23	47	44	9	18	50	24	6	10	6	41	28	2	11	23	0	20	459
sp|Q96HU8|DIRA2_HUMAN GTP-binding protein Di-Ras2 OS=Homo sapiens (Human) OX=9606 GN=DIRAS2 PE=1 SV=1	9	11	5	7	6	12	17	11	3	14	16	19	5	7	6	20	11	1	5	14	0	20	199
tr|A0A087WZ39|A0A087WZ39_HUMAN IGv domain-containing protein OS=Homo sapiens (Human) OX=9606 GN=TRBV15 PE=1 SV=1	7	5	7	7	4	8	1	8	4	2	12	4	5	6	7	8	7	2	6	4	0	20	114
sp|P50583|AP4A_HUMAN Bis(5'-nucleosyl)-tetraphosphatase [asymmetrical] OS=Homo sapiens (Human) OX=9606 GN=NUDT2 PE=1 SV=3	15	8	4	6	4	8	18	9	6	11	17	8	2	5	5	3	5	3	4	6	0	20	147
sp|Q96BW1|UPP_HUMAN Uracil phosphoribosyltransferase homolog OS=Homo sapiens (Human) OX=9606 GN=UPRT PE=1 SV=1	19	16	10	15	8	15	21	26	7	22	29	14	8	9	18	29	17	0	10	16	0	19	309
sp|A6NGE4|DC8L1_HUMAN DDB1- and CUL4-associated factor 8-like protein 1 OS=Homo sapiens (Human) OX=9606 GN=DCAF8L1 PE=2 SV=1	33	37	26	45	13	28	58	45	19	21	44	21	9	26	24	52	35	7	17	40	0	20	600
sp|Q5MY95|ENTP8_HUMAN Ectonucleoside triphosphate diphosphohydrolase 8 OS=Homo sapiens (Human) OX=9606 GN=ENTPD8 PE=1 SV=2	46	19	12	16	10	28	24	49	7	15	65	10	8	25	25	38	30	12	21	35	0	20	495
sp|A6NMB1|SIG16_HUMAN Sialic acid-binding Ig-like lectin 16 OS=Homo sapiens (Human) OX=9606 GN=SIGLEC16 PE=2 SV=3	34	40	12	19	14	25	21	33	10	7	57	14	7	16	34	47	28	9	9	45	0	20	481
sp|P0DSN7|KVD37_HUMAN Probable non-functional immunoglobulinn kappa variable 1D-37 OS=Homo sapiens (Human) OX=9606 GN=IGKV1D-37 PE=5 SV=1	6	7	3	5	2	8	1	10	0	5	14	3	2	2	8	17	8	2	6	8	0	19	117
sp|P32004|L1CAM_HUMAN Neural cell adhesion molecule L1 OS=Homo sapiens (Human) OX=9606 GN=L1CAM PE=1 SV=2	74	62	54	60	17	66	86	97	34	55	109	60	18	41	89	97	74	22	48	94	0	20	1257
sp|P15104|GLNA_HUMAN Glutamine synthetase OS=Homo sapiens (Human) OX=9606 GN=GLUL PE=1 SV=4	25	24	20	19	11	12	27	34	11	18	21	19	12	17	23	21	20	7	15	17	0	20	373
sp|P0C7X2|ZN688_HUMAN Zinc finger protein 688 OS=Homo sapiens (Human) OX=9606 GN=ZNF688 PE=2 SV=1	29	33	3	11	8	9	22	24	7	6	12	10	6	9	41	13	7	5	5	16	0	20	276
sp|O43602|DCX_HUMAN Neuronal migration protein doublecortin OS=Homo sapiens (Human) OX=9606 GN=DCX PE=1 SV=4	22	24	19	29	5	11	15	21	6	11	27	32	8	16	20	45	22	1	11	20	0	20	365
sp|Q9Y6F6|MRVI1_HUMAN Protein MRVI1 OS=Homo sapiens (Human) OX=9606 GN=MRVI1 PE=1 SV=4	73	47	31	32	11	44	95	62	18	19	92	57	19	13	90	95	40	8	9	49	0	20	904
sp|Q1ZYL8|IZUM4_HUMAN Izumo sperm-egg fusion protein 4 OS=Homo sapiens (Human) OX=9606 GN=IZUMO4 PE=2 SV=2	20	10	12	10	12	12	10	9	13	11	24	10	6	11	10	17	11	6	8	10	0	20	232
sp|Q9UBF8|PI4KB_HUMAN Phosphatidylinositol 4-kinase beta OS=Homo sapiens (Human) OX=9606 GN=PI4KB PE=1 SV=1	47	48	32	45	13	41	60	46	23	46	86	41	19	27	43	79	37	7	20	56	0	20	816
sp|Q8IWZ4|TRI48_HUMAN Tripartite motif-containing protein 48 OS=Homo sapiens (Human) OX=9606 GN=TRIM48 PE=2 SV=2	10	15	10	6	13	12	15	6	8	13	25	12	7	9	8	15	9	6	4	5	0	20	208
sp|Q6ICH7|ASPH2_HUMAN Aspartate beta-hydroxylase domain-containing protein 2 OS=Homo sapiens (Human) OX=9606 GN=ASPHD2 PE=2 SV=1	21	24	18	15	19	15	19	27	11	13	36	11	6	16	24	23	20	10	14	27	0	20	369
sp|Q14689|DIP2A_HUMAN Disco-interacting protein 2 homolog A OS=Homo sapiens (Human) OX=9606 GN=DIP2A PE=1 SV=2	139	92	31	73	37	54	78	110	40	55	174	69	30	40	110	122	111	18	39	149	0	20	1571
sp|Q5SQS7|SH24B_HUMAN SH2 domain-containing protein 4B OS=Homo sapiens (Human) OX=9606 GN=SH2D4B PE=2 SV=1	34	44	4	21	2	25	63	21	15	19	45	29	7	15	18	18	12	13	10	16	0	20	431
sp|B1AJZ1|CA196_HUMAN Putative uncharacterized protein C1orf196 OS=Homo sapiens (Human) OX=9606 GN=C1orf196 PE=5 SV=2	7	3	4	5	2	9	7	3	5	5	11	10	8	9	5	13	11	0	2	6	0	19	125
sp|Q96E11|RRFM_HUMAN Ribosome-recycling factor, mitochondrial OS=Homo sapiens (Human) OX=9606 GN=MRRF PE=1 SV=1	24	16	16	10	2	11	18	9	7	17	24	26	10	5	9	17	17	0	3	21	0	19	262
sp|Q9H1A3|METL9_HUMAN Methyltransferase-like protein 9 OS=Homo sapiens (Human) OX=9606 GN=METTL9 PE=2 SV=1	14	18	14	13	6	15	20	22	5	15	42	15	8	16	14	23	13	10	12	23	0	20	318
sp|P23409|MYF6_HUMAN Myogenic factor 6 OS=Homo sapiens (Human) OX=9606 GN=MYF6 PE=1 SV=1	15	18	5	13	8	12	22	14	4	9	25	13	5	6	18	27	9	2	5	12	0	20	242
sp|Q92806|KCNJ9_HUMAN G protein-activated inward rectifier potassium channel 3 OS=Homo sapiens (Human) OX=9606 GN=KCNJ9 PE=2 SV=2	34	28	9	21	8	13	35	29	9	17	43	7	7	22	15	27	21	8	10	30	0	20	393
sp|Q9NXC2|GFOD1_HUMAN Glucose-fructose oxidoreductase domain-containing protein 1 OS=Homo sapiens (Human) OX=9606 GN=GFOD1 PE=1 SV=1	25	20	9	23	10	19	21	31	6	20	43	18	14	15	19	21	28	4	11	33	0	20	390
sp|A6NGA9|TM202_HUMAN Transmembrane protein 202 OS=Homo sapiens (Human) OX=9606 GN=TMEM202 PE=4 SV=1	12	14	11	7	9	9	12	12	8	13	39	11	10	11	15	28	18	10	10	14	0	20	273
sp|Q96C36|P5CR2_HUMAN Pyrroline-5-carboxylate reductase 2 OS=Homo sapiens (Human) OX=9606 GN=PYCR2 PE=1 SV=1	38	12	6	13	6	12	16	27	8	17	40	18	10	9	15	26	19	0	3	25	0	19	320
sp|P35573|GDE_HUMAN Glycogen debranching enzyme OS=Homo sapiens (Human) OX=9606 GN=AGL PE=1 SV=3	94	84	82	75	38	56	108	96	45	91	148	83	33	66	85	90	71	31	63	93	0	20	1532
sp|Q460N3|PAR15_HUMAN Protein mono-ADP-ribosyltransferase PARP15 OS=Homo sapiens (Human) OX=9606 GN=PARP15 PE=1 SV=2	53	34	38	33	14	26	30	45	13	38	46	43	16	32	36	57	48	6	18	52	0	20	678
sp|P82921|RT21_HUMAN 28S ribosomal protein S21, mitochondrial OS=Homo sapiens (Human) OX=9606 GN=MRPS21 PE=1 SV=3	5	14	5	3	4	3	7	3	2	6	5	6	6	2	2	2	3	1	5	3	0	20	87
sp|Q5TEJ8|THMS2_HUMAN Protein THEMIS2 OS=Homo sapiens (Human) OX=9606 GN=THEMIS2 PE=1 SV=1	32	41	6	29	14	36	56	39	16	22	76	31	11	23	58	48	35	7	13	50	0	20	643
sp|Q5T953|IER5L_HUMAN Immediate early response gene 5-like protein OS=Homo sapiens (Human) OX=9606 GN=IER5L PE=2 SV=1	64	20	6	15	15	34	17	38	20	8	40	7	2	9	52	30	8	1	10	8	0	20	404
tr|A0A1B0GWI6|A0A1B0GWI6_HUMAN Uncharacterized protein OS=Homo sapiens (Human) OX=9606 GN=LOC101059915 PE=1 SV=2	40	41	6	28	6	31	34	61	8	11	38	23	5	12	62	54	17	8	4	29	0	20	518
sp|Q9NWQ8|PHAG1_HUMAN Phosphoprotein associated with glycosphingolipid-enriched microdomains 1 OS=Homo sapiens (Human) OX=9606 GN=PAG1 PE=1 SV=2	28	15	18	26	8	20	49	28	8	13	35	25	9	8	28	52	30	1	10	21	0	20	432
sp|O95758|PTBP3_HUMAN Polypyrimidine tract-binding protein 3 OS=Homo sapiens (Human) OX=9606 GN=PTBP3 PE=1 SV=2	47	20	33	23	5	27	19	41	15	32	61	31	12	26	38	45	31	0	12	34	0	19	552
sp|Q5K4E3|POLS2_HUMAN Polyserase-2 OS=Homo sapiens (Human) OX=9606 GN=PRSS36 PE=1 SV=2	85	48	14	26	35	38	54	84	26	25	103	5	9	18	92	59	35	32	13	54	0	20	855
sp|Q13428|TCOF_HUMAN Treacle protein OS=Homo sapiens (Human) OX=9606 GN=TCOF1 PE=1 SV=3	220	50	20	57	4	82	140	114	7	15	62	168	14	3	137	203	99	4	4	85	0	20	1488
sp|O95156|NXPH2_HUMAN Neurexophilin-2 OS=Homo sapiens (Human) OX=9606 GN=NXPH2 PE=2 SV=2	9	10	11	12	7	8	14	14	7	13	23	23	4	13	18	23	15	5	10	25	0	20	264
sp|Q8N5U6|RNF10_HUMAN RING finger protein 10 OS=Homo sapiens (Human) OX=9606 GN=RNF10 PE=1 SV=2	55	41	26	34	19	39	73	45	23	22	67	60	12	33	57	100	35	7	17	46	0	20	811
sp|Q15907|RB11B_HUMAN Ras-related protein Rab-11B OS=Homo sapiens (Human) OX=9606 GN=RAB11B PE=1 SV=4	18	14	14	16	2	8	15	12	4	15	18	13	2	7	5	15	14	2	8	16	0	20	218
sp|Q8NH41|OR4KF_HUMAN Olfactory receptor 4K15 OS=Homo sapiens (Human) OX=9606 GN=OR4K15 PE=2 SV=2	20	13	10	11	9	5	8	7	6	22	52	15	10	29	13	37	27	2	12	40	0	20	348
sp|P49888|ST1E1_HUMAN Sulfotransferase 1E1 OS=Homo sapiens (Human) OX=9606 GN=SULT1E1 PE=1 SV=1	8	11	14	16	4	8	29	11	9	17	21	30	11	20	16	15	12	7	15	20	0	20	294
sp|Q9NZQ7|PD1L1_HUMAN Programmed cell death 1 ligand 1 OS=Homo sapiens (Human) OX=9606 GN=CD274 PE=1 SV=1	16	15	14	14	6	12	21	12	9	19	30	19	7	11	10	13	25	3	11	23	0	20	290
sp|Q5JUW0|KRBX4_HUMAN KRAB domain-containing protein 4 OS=Homo sapiens (Human) OX=9606 GN=KRBOX4 PE=2 SV=1	8	9	2	12	3	10	16	8	2	4	14	16	4	8	6	16	8	7	7	11	0	20	171
sp|Q9H9B4|SFXN1_HUMAN Sideroflexin-1 OS=Homo sapiens (Human) OX=9606 GN=SFXN1 PE=1 SV=4	32	17	20	7	5	13	16	19	5	21	28	13	13	16	22	17	23	5	7	23	0	20	322
sp|Q6ZRS2|SRCAP_HUMAN Helicase SRCAP OS=Homo sapiens (Human) OX=9606 GN=SRCAP PE=1 SV=3	307	202	61	108	29	158	250	202	56	88	333	103	46	54	456	329	211	20	27	190	0	20	3230
sp|O43683|BUB1_HUMAN Mitotic checkpoint serine/threonine-protein kinase BUB1 OS=Homo sapiens (Human) OX=9606 GN=BUB1 PE=1 SV=1	75	37	54	47	20	66	86	55	35	42	102	77	34	48	66	85	49	13	30	64	0	20	1085
sp|Q14332|FZD2_HUMAN Frizzled-2 OS=Homo sapiens (Human) OX=9606 GN=FZD2 PE=1 SV=1	41	33	9	13	22	20	29	43	17	31	57	16	17	37	41	34	36	13	21	35	0	20	565
sp|Q9P2S2|NRX2A_HUMAN Neurexin-2 OS=Homo sapiens (Human) OX=9606 GN=NRXN2 PE=2 SV=1	140	114	71	111	37	47	87	172	32	51	184	53	34	66	115	119	115	16	42	106	0	20	1712
sp|Q9H773|DCTP1_HUMAN dCTP pyrophosphatase 1 OS=Homo sapiens (Human) OX=9606 GN=DCTPP1 PE=1 SV=1	19	15	2	11	2	7	16	14	4	6	18	3	2	5	12	12	8	3	3	8	0	20	170
sp|P48060|GLIP1_HUMAN Glioma pathogenesis-related protein 1 OS=Homo sapiens (Human) OX=9606 GN=GLIPR1 PE=1 SV=3	16	11	19	14	11	8	5	11	8	19	18	15	4	11	16	20	15	8	15	22	0	20	266
sp|P55036|PSMD4_HUMAN 26S proteasome non-ATPase regulatory subunit 4 OS=Homo sapiens (Human) OX=9606 GN=PSMD4 PE=1 SV=1	38	15	18	28	4	17	35	27	6	16	34	24	13	10	16	26	24	0	3	23	0	19	377
sp|Q8NEK5|ZN548_HUMAN Zinc finger protein 548 OS=Homo sapiens (Human) OX=9606 GN=ZNF548 PE=1 SV=2	14	41	19	14	31	23	53	34	38	20	30	34	10	27	20	42	27	7	25	24	0	20	533
sp|Q9UBR5|CKLF_HUMAN Chemokine-like factor OS=Homo sapiens (Human) OX=9606 GN=CKLF PE=2 SV=1	8	5	3	4	3	3	5	7	3	12	23	10	5	11	9	5	12	2	4	18	0	20	152
sp|Q13639|5HT4R_HUMAN 5-hydroxytryptamine receptor 4 OS=Homo sapiens (Human) OX=9606 GN=HTR4 PE=1 SV=2	27	18	15	15	18	15	12	18	7	31	42	12	12	22	18	26	25	8	15	32	0	20	388
sp|Q96EA4|SPDLY_HUMAN Protein Spindly OS=Homo sapiens (Human) OX=9606 GN=SPDL1 PE=1 SV=2	30	32	29	21	11	50	88	13	7	17	82	62	23	6	17	46	26	0	14	31	0	19	605
sp|Q6ZVX7|FBX50_HUMAN F-box only protein 50 OS=Homo sapiens (Human) OX=9606 GN=NCCRP1 PE=1 SV=1	18	24	6	9	2	14	24	20	9	6	35	5	4	5	37	18	11	8	5	15	0	20	275
sp|A6NER0|TBC3F_HUMAN TBC1 domain family member 3F OS=Homo sapiens (Human) OX=9606 GN=TBC1D3F PE=2 SV=3	37	47	10	30	13	31	33	42	15	22	47	32	12	17	47	38	22	15	13	26	0	20	549
sp|Q9NXB9|ELOV2_HUMAN Elongation of very long chain fatty acids protein 2 OS=Homo sapiens (Human) OX=9606 GN=ELOVL2 PE=1 SV=2	16	8	13	9	5	11	8	16	7	15	37	20	14	24	11	20	17	10	18	17	0	20	296
sp|P29400|CO4A5_HUMAN Collagen alpha-5(IV) chain OS=Homo sapiens (Human) OX=9606 GN=COL4A5 PE=1 SV=2	47	37	32	54	20	73	61	478	13	69	112	80	26	41	391	64	38	5	13	31	0	20	1685
tr|A0A2R8Y619|A0A2R8Y619_HUMAN Histone H2B OS=Homo sapiens (Human) OX=9606 GN=LOC114483833 PE=1 SV=1	11	10	3	2	2	7	7	10	2	4	8	12	4	2	3	14	7	0	6	8	0	19	122
sp|Q5TA82|LCE2D_HUMAN Late cornified envelope protein 2D OS=Homo sapiens (Human) OX=9606 GN=LCE2D PE=1 SV=1	3	5	1	1	23	8	2	13	5	0	2	5	1	1	20	18	1	0	0	1	0	17	110
sp|Q9HA47|UCK1_HUMAN Uridine-cytidine kinase 1 OS=Homo sapiens (Human) OX=9606 GN=UCK1 PE=1 SV=1	13	22	8	20	4	12	18	19	10	14	22	15	6	13	14	18	16	1	8	24	0	20	277
sp|O95661|DIRA3_HUMAN GTP-binding protein Di-Ras3 OS=Homo sapiens (Human) OX=9606 GN=DIRAS3 PE=1 SV=1	14	11	12	8	6	6	14	15	10	11	29	23	6	8	7	12	14	2	6	15	0	20	229
sp|Q9NZK5|ADA2_HUMAN Adenosine deaminase 2 OS=Homo sapiens (Human) OX=9606 GN=ADA2 PE=1 SV=2	33	29	15	27	5	12	33	25	22	34	50	32	25	30	23	29	29	8	16	34	0	20	511
sp|Q5SVJ3|CA100_HUMAN Uncharacterized protein C1orf100 OS=Homo sapiens (Human) OX=9606 GN=C1orf100 PE=2 SV=1	8	16	4	6	3	8	9	3	5	10	15	8	1	6	15	8	7	2	10	3	0	20	147
sp|O94830|DDHD2_HUMAN Phospholipase DDHD2 OS=Homo sapiens (Human) OX=9606 GN=DDHD2 PE=1 SV=2	24	36	31	44	12	33	55	42	17	42	65	38	16	34	46	60	34	9	26	47	0	20	711
sp|Q8TF66|LRC15_HUMAN Leucine-rich repeat-containing protein 15 OS=Homo sapiens (Human) OX=9606 GN=LRRC15 PE=2 SV=2	31	25	49	20	16	37	22	34	16	32	100	11	10	18	38	45	27	7	12	31	0	20	581
sp|Q7Z402|TMC7_HUMAN Transmembrane channel-like protein 7 OS=Homo sapiens (Human) OX=9606 GN=TMC7 PE=1 SV=1	34	42	21	26	21	26	39	27	10	66	89	35	16	52	29	70	41	11	32	36	0	20	723
sp|Q9Y2P8|RCL1_HUMAN RNA 3'-terminal phosphate cyclase-like protein OS=Homo sapiens (Human) OX=9606 GN=RCL1 PE=1 SV=3	18	23	12	17	8	14	16	37	5	23	49	23	9	15	20	29	19	0	11	25	0	19	373
sp|Q8TC94|ACTL9_HUMAN Actin-like protein 9 OS=Homo sapiens (Human) OX=9606 GN=ACTL9 PE=1 SV=3	34	24	10	16	7	22	25	31	11	9	52	15	7	16	32	30	23	4	12	36	0	20	416
sp|Q9UEU5|GGE2D_HUMAN G antigen 2D OS=Homo sapiens (Human) OX=9606 GN=GAGE2D PE=1 SV=1	8	8	1	7	3	11	21	12	1	1	0	3	4	1	18	6	5	1	2	3	0	19	116
sp|Q14494|NF2L1_HUMAN Endoplasmic reticulum membrane sensor NFE2L1 OS=Homo sapiens (Human) OX=9606 GN=NFE2L1 PE=1 SV=1	52	40	30	54	6	44	66	49	10	24	98	26	14	24	48	98	35	4	19	31	0	20	772
tr|A0A075B734|A0A075B734_HUMAN Uncharacterized protein OS=Homo sapiens (Human) OX=9606 GN=LOC100509620 PE=3 SV=1	28	14	11	7	4	6	17	32	14	24	33	8	15	19	19	28	20	9	8	31	0	20	347
sp|Q96M43|NBPF4_HUMAN Neuroblastoma breakpoint family member 4 OS=Homo sapiens (Human) OX=9606 GN=NBPF4 PE=2 SV=2	41	34	22	44	13	45	76	22	23	15	68	36	5	12	41	63	26	6	11	35	0	20	638
sp|O14519|CDKA1_HUMAN Cyclin-dependent kinase 2-associated protein 1 OS=Homo sapiens (Human) OX=9606 GN=CDK2AP1 PE=1 SV=1	15	8	4	1	1	5	8	9	3	5	11	5	4	0	7	14	6	0	6	3	0	18	115
sp|Q86U38|NOP9_HUMAN Nucleolar protein 9 OS=Homo sapiens (Human) OX=9606 GN=NOP9 PE=1 SV=1	65	49	10	20	13	36	50	47	20	13	98	19	6	20	40	45	27	4	8	46	0	20	636
sp|P30153|2AAA_HUMAN Serine/threonine-protein phosphatase 2A 65 kDa regulatory subunit A alpha isoform OS=Homo sapiens (Human) OX=9606 GN=PPP2R1A PE=1 SV=4	57	27	21	36	14	21	47	20	11	31	81	32	14	18	26	39	27	5	10	52	0	20	589
sp|Q9HCE0|EPG5_HUMAN Ectopic P granules protein 5 homolog OS=Homo sapiens (Human) OX=9606 GN=EPG5 PE=1 SV=2	164	96	75	96	51	174	184	101	83	111	358	137	70	107	136	220	126	42	73	175	0	20	2579
sp|P00918|CAH2_HUMAN Carbonic anhydrase 2 OS=Homo sapiens (Human) OX=9606 GN=CA2 PE=1 SV=2	13	7	10	19	1	11	13	22	12	9	26	24	2	12	17	18	12	7	8	17	0	20	260
sp|Q8WZ94|OR5P3_HUMAN Olfactory receptor 5P3 OS=Homo sapiens (Human) OX=9606 GN=OR5P3 PE=2 SV=1	17	9	8	7	15	2	7	18	9	30	36	12	11	19	11	29	26	1	15	29	0	20	311
sp|Q0VD83|APOBR_HUMAN Apolipoprotein B receptor OS=Homo sapiens (Human) OX=9606 GN=APOBR PE=1 SV=3	142	81	8	42	8	53	203	158	17	8	69	24	15	9	58	72	54	19	5	52	0	20	1097
sp|Q8NGC6|OR4KH_HUMAN Olfactory receptor 4K17 OS=Homo sapiens (Human) OX=9606 GN=OR4K17 PE=3 SV=3	14	5	16	8	8	8	6	13	6	33	47	16	10	25	13	23	20	3	9	32	0	20	315
sp|Q96ED9|HOOK2_HUMAN Protein Hook homolog 2 OS=Homo sapiens (Human) OX=9606 GN=HOOK2 PE=1 SV=3	59	75	19	33	10	65	99	29	17	14	107	31	16	9	27	45	25	6	10	23	0	20	719
sp|Q9BQ65|USB1_HUMAN U6 snRNA phosphodiesterase OS=Homo sapiens (Human) OX=9606 GN=USB1 PE=1 SV=1	13	19	6	14	3	14	20	17	12	4	27	9	7	18	15	20	15	3	6	23	0	20	265
sp|Q8WWY6|MB3L1_HUMAN Methyl-CpG-binding domain protein 3-like 1 OS=Homo sapiens (Human) OX=9606 GN=MBD3L1 PE=1 SV=2	13	14	4	7	6	14	17	12	4	8	21	13	3	2	11	19	9	2	4	11	0	20	194
sp|A0A1B0GV03|GG6L7_HUMAN Golgin subfamily A member 6-like protein 7 OS=Homo sapiens (Human) OX=9606 GN=GOLGA6L7 PE=3 SV=1	24	48	11	17	5	99	129	28	15	19	35	69	41	7	14	21	21	8	6	5	0	20	622
sp|Q9UHL4|DPP2_HUMAN Dipeptidyl peptidase 2 OS=Homo sapiens (Human) OX=9606 GN=DPP7 PE=1 SV=3	60	38	16	30	8	22	23	46	9	13	54	9	7	32	28	24	23	11	15	24	0	20	492
sp|P12109|CO6A1_HUMAN Collagen alpha-1(VI) chain OS=Homo sapiens (Human) OX=9606 GN=COL6A1 PE=1 SV=3	77	60	28	71	20	42	68	156	14	42	71	54	11	33	89	54	41	4	28	65	0	20	1028
sp|Q13614|MTMR2_HUMAN Myotubularin-related protein 2 OS=Homo sapiens (Human) OX=9606 GN=MTMR2 PE=1 SV=4	39	44	32	27	10	20	52	30	18	32	59	34	13	26	34	65	29	11	25	43	0	20	643
sp|Q9NUK0|MBNL3_HUMAN Muscleblind-like protein 3 OS=Homo sapiens (Human) OX=9606 GN=MBNL3 PE=1 SV=2	40	18	20	9	15	19	12	18	13	13	28	15	17	13	39	16	25	1	5	18	0	20	354
sp|P48553|TPC10_HUMAN Trafficking protein particle complex subunit 10 OS=Homo sapiens (Human) OX=9606 GN=TRAPPC10 PE=1 SV=2	74	55	43	61	30	61	94	52	41	49	143	66	27	51	69	122	70	19	39	93	0	20	1259
sp|Q8TAD7|OCC1_HUMAN Overexpressed in colon carcinoma 1 protein OS=Homo sapiens (Human) OX=9606 GN=OCC1 PE=1 SV=2	7	3	4	3	1	2	4	9	0	0	1	4	2	0	2	6	6	0	2	7	0	16	63
sp|P24278|ZBT25_HUMAN Zinc finger and BTB domain-containing protein 25 OS=Homo sapiens (Human) OX=9606 GN=ZBTB25 PE=1 SV=2	21	21	18	20	14	32	31	20	21	23	40	20	7	18	22	47	24	1	11	24	0	20	435
sp|Q5JVS0|HABP4_HUMAN Intracellular hyaluronan-binding protein 4 OS=Homo sapiens (Human) OX=9606 GN=HABP4 PE=1 SV=1	35	53	12	30	2	21	42	50	4	7	15	19	9	13	35	20	15	3	7	21	0	20	413
sp|Q10469|MGAT2_HUMAN Alpha-1,6-mannosyl-glycoprotein 2-beta-N-acetylglucosaminyltransferase OS=Homo sapiens (Human) OX=9606 GN=MGAT2 PE=1 SV=1	29	29	20	25	12	19	20	23	14	18	48	27	6	22	26	26	20	13	18	32	0	20	447
sp|P15812|CD1E_HUMAN T-cell surface glycoprotein CD1e, membrane-associated OS=Homo sapiens (Human) OX=9606 GN=CD1E PE=1 SV=2	25	17	15	10	10	27	18	31	13	20	51	18	8	19	18	32	15	13	8	20	0	20	388
sp|Q96FN9|DTD2_HUMAN D-aminoacyl-tRNA deacylase 2 OS=Homo sapiens (Human) OX=9606 GN=DTD2 PE=1 SV=1	13	9	9	5	4	10	13	14	5	8	20	10	3	6	6	7	7	1	4	14	0	20	168
sp|P54132|BLM_HUMAN Bloom syndrome protein OS=Homo sapiens (Human) OX=9606 GN=BLM PE=1 SV=1	75	65	72	103	30	59	85	61	35	68	126	123	28	57	66	157	90	9	34	74	0	20	1417
sp|P11021|BIP_HUMAN Endoplasmic reticulum chaperone BiP OS=Homo sapiens (Human) OX=9606 GN=HSPA5 PE=1 SV=2	46	28	28	47	2	24	64	50	6	42	52	61	11	23	27	28	49	2	13	51	0	20	654
sp|Q8N8M0|NAT16_HUMAN Probable N-acetyltransferase 16 OS=Homo sapiens (Human) OX=9606 GN=NAT16 PE=2 SV=2	32	31	6	17	5	19	28	34	4	11	50	13	2	9	24	23	17	7	8	29	0	20	369
sp|Q9H6L5|RETR1_HUMAN Reticulophagy regulator 1 OS=Homo sapiens (Human) OX=9606 GN=RETREG1 PE=1 SV=1	43	18	13	31	10	28	47	30	7	21	63	24	8	19	29	48	22	9	6	21	0	20	497
sp|Q96MU5|CQ077_HUMAN Uncharacterized protein C17orf77 OS=Homo sapiens (Human) OX=9606 GN=C17orf77 PE=2 SV=2	11	14	6	6	18	9	17	19	6	4	34	8	1	6	24	29	14	2	5	10	0	20	243
sp|O14686|KMT2D_HUMAN Histone-lysine N-methyltransferase 2D OS=Homo sapiens (Human) OX=9606 GN=KMT2D PE=1 SV=2	387	253	105	201	115	454	422	473	123	106	585	222	99	121	807	519	225	34	69	217	0	20	5537
sp|Q6P1N9|TATD1_HUMAN Putative deoxyribonuclease TATDN1 OS=Homo sapiens (Human) OX=9606 GN=TATDN1 PE=1 SV=2	16	13	16	20	10	10	20	22	9	20	29	25	8	18	11	13	15	2	6	14	0	20	297
sp|A1A4S6|RHG10_HUMAN Rho GTPase-activating protein 10 OS=Homo sapiens (Human) OX=9606 GN=ARHGAP10 PE=1 SV=1	46	44	35	37	11	34	71	39	21	36	71	61	18	42	50	63	42	7	17	41	0	20	786
sp|O00469|PLOD2_HUMAN Procollagen-lysine,2-oxoglutarate 5-dioxygenase 2 OS=Homo sapiens (Human) OX=9606 GN=PLOD2 PE=1 SV=2	36	33	47	49	13	22	45	51	23	44	60	52	15	42	36	31	32	14	34	58	0	20	737
sp|O14828|SCAM3_HUMAN Secretory carrier-associated membrane protein 3 OS=Homo sapiens (Human) OX=9606 GN=SCAMP3 PE=1 SV=3	43	17	15	8	7	18	18	18	3	11	34	10	7	28	32	26	16	6	10	20	0	20	347
sp|Q99062|CSF3R_HUMAN Granulocyte colony-stimulating factor receptor OS=Homo sapiens (Human) OX=9606 GN=CSF3R PE=1 SV=1	51	32	27	24	27	51	47	60	28	34	114	19	15	17	85	70	55	28	17	35	0	20	836
sp|P21127|CD11B_HUMAN Cyclin-dependent kinase 11B OS=Homo sapiens (Human) OX=9606 GN=CDK11B PE=1 SV=4	39	78	17	44	3	29	134	46	22	25	62	68	19	19	41	64	30	8	17	30	0	20	795
sp|Q6IN85|P4R3A_HUMAN Serine/threonine-protein phosphatase 4 regulatory subunit 3A OS=Homo sapiens (Human) OX=9606 GN=PPP4R3A PE=1 SV=1	40	38	34	65	11	34	81	34	16	44	98	60	25	40	33	60	49	5	21	45	0	20	833
sp|Q9BYG5|PAR6B_HUMAN Partitioning defective 6 homolog beta OS=Homo sapiens (Human) OX=9606 GN=PARD6B PE=1 SV=1	16	20	23	23	1	14	29	27	11	28	32	19	5	14	22	34	19	0	8	27	0	19	372
sp|A1Z1Q3|MACD2_HUMAN ADP-ribose glycohydrolase MACROD2 OS=Homo sapiens (Human) OX=9606 GN=MACROD2 PE=1 SV=2	25	14	26	32	9	14	60	30	9	22	25	37	8	8	19	27	21	3	10	26	0	20	425
sp|Q5TZK3|FAM74_HUMAN Protein FAM74A4/A6 OS=Homo sapiens (Human) OX=9606 GN=FAM74A4 PE=1 SV=1	5	21	1	2	5	8	13	9	2	0	7	9	3	4	4	10	6	6	1	7	0	19	123
sp|P17174|AATC_HUMAN Aspartate aminotransferase, cytoplasmic OS=Homo sapiens (Human) OX=9606 GN=GOT1 PE=1 SV=3	34	22	25	19	4	15	26	28	9	19	37	21	6	23	24	27	22	9	12	31	0	20	413
sp|Q8WWZ3|EDAD_HUMAN Ectodysplasin-A receptor-associated adapter protein OS=Homo sapiens (Human) OX=9606 GN=EDARADD PE=1 SV=3	5	16	11	19	9	9	18	10	5	6	21	13	7	6	16	15	14	4	3	8	0	20	215
sp|Q8IW70|T151B_HUMAN Transmembrane protein 151B OS=Homo sapiens (Human) OX=9606 GN=TMEM151B PE=2 SV=2	61	46	10	19	22	16	37	58	21	8	49	7	10	17	34	55	25	10	26	35	0	20	566
sp|Q5T4D3|TMTC4_HUMAN Protein O-mannosyl-transferase TMTC4 OS=Homo sapiens (Human) OX=9606 GN=TMTC4 PE=1 SV=2	68	38	41	28	15	16	31	50	24	34	113	38	14	37	24	48	23	16	27	56	0	20	741
sp|Q3ZCT1|ZN260_HUMAN Zinc finger protein 260 OS=Homo sapiens (Human) OX=9606 GN=ZNF260 PE=1 SV=3	14	15	14	3	29	23	35	31	37	24	20	54	6	16	13	30	26	0	14	8	0	19	412
sp|Q9H8Y8|GORS2_HUMAN Golgi reassembly-stacking protein 2 OS=Homo sapiens (Human) OX=9606 GN=GORASP2 PE=1 SV=3	29	11	24	17	3	8	27	38	7	18	52	14	8	10	59	52	33	3	7	32	0	20	452
sp|Q99942|RNF5_HUMAN E3 ubiquitin-protein ligase RNF5 OS=Homo sapiens (Human) OX=9606 GN=RNF5 PE=1 SV=1	13	13	3	5	7	9	14	23	5	4	12	4	1	18	17	9	8	4	2	9	0	20	180
sp|Q8HWS3|RFX6_HUMAN DNA-binding protein RFX6 OS=Homo sapiens (Human) OX=9606 GN=RFX6 PE=1 SV=2	56	31	45	41	19	52	50	61	30	42	91	46	24	36	60	101	59	7	34	43	0	20	928
sp|Q9HC24|LFG4_HUMAN Protein lifeguard 4 OS=Homo sapiens (Human) OX=9606 GN=TMBIM4 PE=1 SV=3	19	7	5	8	2	3	9	10	6	16	45	9	4	24	6	18	15	1	13	18	0	20	238
sp|P21266|GSTM3_HUMAN Glutathione S-transferase Mu 3 OS=Homo sapiens (Human) OX=9606 GN=GSTM3 PE=1 SV=3	11	11	10	17	8	11	17	9	3	13	26	18	8	15	9	11	8	4	10	6	0	20	225
sp|Q96SQ7|ATOH8_HUMAN Protein atonal homolog 8 OS=Homo sapiens (Human) OX=9606 GN=ATOH8 PE=2 SV=2	39	33	8	9	7	11	18	20	6	9	26	18	1	5	47	23	15	1	7	18	0	20	321
sp|Q03938|ZNF90_HUMAN Zinc finger protein 90 OS=Homo sapiens (Human) OX=9606 GN=ZNF90 PE=2 SV=3	25	27	15	16	38	14	52	33	38	34	38	90	5	23	16	54	38	1	25	19	0	20	601
sp|Q96RS6|NUDC1_HUMAN NudC domain-containing protein 1 OS=Homo sapiens (Human) OX=9606 GN=NUDCD1 PE=1 SV=2	32	25	28	38	14	24	51	26	15	38	65	35	13	22	24	42	30	9	22	30	0	20	583
sp|Q7Z4T8|GLTL5_HUMAN Inactive polypeptide N-acetylgalactosaminyltransferase-like protein 5 OS=Homo sapiens (Human) OX=9606 GN=GALNTL5 PE=2 SV=3	16	26	18	23	8	14	28	26	17	33	45	33	11	21	21	31	18	10	17	27	0	20	443
sp|P19022|CADH2_HUMAN Cadherin-2 OS=Homo sapiens (Human) OX=9606 GN=CDH2 PE=1 SV=4	63	40	57	74	8	42	51	58	12	69	71	38	16	28	70	52	58	8	26	65	0	20	906
sp|P05413|FABPH_HUMAN Fatty acid-binding protein, heart OS=Homo sapiens (Human) OX=9606 GN=FABP3 PE=1 SV=4	6	4	3	11	1	3	8	10	3	7	14	14	3	6	1	6	19	2	2	10	0	20	133
sp|Q96JM4|LRIQ1_HUMAN Leucine-rich repeat and IQ domain-containing protein 1 OS=Homo sapiens (Human) OX=9606 GN=LRRIQ1 PE=2 SV=3	70	74	112	90	37	95	195	52	44	108	186	177	25	43	49	151	84	27	35	68	0	20	1722
sp|Q9BXG8|SPZ1_HUMAN Spermatogenic leucine zipper protein 1 OS=Homo sapiens (Human) OX=9606 GN=SPZ1 PE=1 SV=2	24	14	35	15	4	35	49	11	12	23	40	50	14	9	14	33	23	3	5	17	0	20	430
sp|P68366|TBA4A_HUMAN Tubulin alpha-4A chain OS=Homo sapiens (Human) OX=9606 GN=TUBA4A PE=1 SV=1	36	21	16	29	13	16	35	34	13	27	31	19	11	20	22	23	27	4	19	32	0	20	448
sp|B2RUY7|VWC2L_HUMAN von Willebrand factor C domain-containing protein 2-like OS=Homo sapiens (Human) OX=9606 GN=VWC2L PE=1 SV=1	11	4	12	13	27	6	20	15	10	12	9	15	1	7	19	9	5	3	6	18	0	20	222
sp|Q13884|SNTB1_HUMAN Beta-1-syntrophin OS=Homo sapiens (Human) OX=9606 GN=SNTB1 PE=1 SV=3	54	31	12	24	6	20	34	50	16	31	49	33	8	14	31	46	30	7	11	31	0	20	538
sp|Q96FV9|THOC1_HUMAN THO complex subunit 1 OS=Homo sapiens (Human) OX=9606 GN=THOC1 PE=1 SV=1	29	30	44	34	13	28	74	27	8	28	72	48	15	31	31	48	42	10	17	28	0	20	657
sp|P08912|ACM5_HUMAN Muscarinic acetylcholine receptor M5 OS=Homo sapiens (Human) OX=9606 GN=CHRM5 PE=1 SV=2	43	29	23	16	17	17	26	20	8	28	52	38	11	17	30	41	43	13	22	38	0	20	532
sp|Q8N2Z9|CENPS_HUMAN Centromere protein S OS=Homo sapiens (Human) OX=9606 GN=CENPS PE=1 SV=1	14	9	6	5	3	10	20	3	2	6	10	14	3	5	1	10	8	0	3	6	0	19	138
sp|Q8IYK4|GT252_HUMAN Procollagen galactosyltransferase 2 OS=Homo sapiens (Human) OX=9606 GN=COLGALT2 PE=1 SV=1	41	41	22	40	6	21	49	22	16	33	61	36	18	23	44	34	35	15	31	38	0	20	626
sp|Q8TC26|TM163_HUMAN Transmembrane protein 163 OS=Homo sapiens (Human) OX=9606 GN=TMEM163 PE=2 SV=1	29	17	3	11	3	7	14	19	7	21	34	8	6	15	17	31	9	4	7	27	0	20	289
sp|Q9UJ42|GP160_HUMAN Probable G-protein coupled receptor 160 OS=Homo sapiens (Human) OX=9606 GN=GPR160 PE=2 SV=1	11	8	16	7	14	14	8	5	5	38	49	16	8	32	13	25	20	7	20	22	0	20	338
sp|Q6ICL7|S35E4_HUMAN Solute carrier family 35 member E4 OS=Homo sapiens (Human) OX=9606 GN=SLC35E4 PE=2 SV=1	49	24	6	5	13	9	8	33	9	4	68	3	9	11	22	27	20	6	4	20	0	20	350
sp|P15421|GLPE_HUMAN Glycophorin-E OS=Homo sapiens (Human) OX=9606 GN=GYPE PE=2 SV=2	4	2	2	0	1	1	1	5	1	12	6	2	5	2	0	13	7	2	3	9	0	18	78
sp|Q9H2U9|ADAM7_HUMAN Disintegrin and metalloproteinase domain-containing protein 7 OS=Homo sapiens (Human) OX=9606 GN=ADAM7 PE=1 SV=3	22	27	40	42	44	28	57	54	28	48	64	58	16	32	38	40	40	4	32	40	0	20	754
sp|P04920|B3A2_HUMAN Anion exchange protein 2 OS=Homo sapiens (Human) OX=9606 GN=SLC4A2 PE=1 SV=4	106	87	20	50	10	47	106	95	36	52	149	45	29	62	91	83	60	10	17	86	0	20	1241
sp|P58304|VSX2_HUMAN Visual system homeobox 2 OS=Homo sapiens (Human) OX=9606 GN=VSX2 PE=1 SV=1	37	25	5	17	3	15	34	29	8	9	35	26	12	6	26	36	15	4	6	13	0	20	361
sp|Q6UX01|LMBRL_HUMAN Protein LMBR1L OS=Homo sapiens (Human) OX=9606 GN=LMBR1L PE=1 SV=2	35	28	14	13	12	14	24	27	7	25	91	13	12	33	18	33	27	8	17	38	0	20	489
sp|Q53H12|AGK_HUMAN Acylglycerol kinase, mitochondrial OS=Homo sapiens (Human) OX=9606 GN=AGK PE=1 SV=2	28	20	13	17	8	22	30	28	9	23	43	30	6	17	26	25	35	8	8	26	0	20	422
sp|Q9H7T9|AUNIP_HUMAN Aurora kinase A and ninein-interacting protein OS=Homo sapiens (Human) OX=9606 GN=AUNIP PE=1 SV=1	21	18	17	21	7	26	24	19	12	10	31	27	5	12	22	35	27	9	3	11	0	20	357
sp|Q9UK23|NAGPA_HUMAN N-acetylglucosamine-1-phosphodiester alpha-N-acetylglucosaminidase OS=Homo sapiens (Human) OX=9606 GN=NAGPA PE=1 SV=2	43	42	21	25	28	20	33	54	18	9	51	8	5	19	30	33	31	10	6	29	0	20	515
sp|P26022|PTX3_HUMAN Pentraxin-related protein PTX3 OS=Homo sapiens (Human) OX=9606 GN=PTX3 PE=1 SV=3	38	25	14	15	10	14	37	35	9	17	44	8	10	10	14	22	20	10	7	22	0	20	381
sp|Q9Y3D5|RT18C_HUMAN 28S ribosomal protein S18c, mitochondrial OS=Homo sapiens (Human) OX=9606 GN=MRPS18C PE=1 SV=1	8	7	4	4	7	6	5	11	5	8	12	15	4	3	8	7	9	1	6	12	0	20	142
sp|A0JD36|TRDV2_HUMAN T cell receptor delta variable 2 OS=Homo sapiens (Human) OX=9606 GN=TRDV2 PE=1 SV=1	8	5	5	6	3	4	6	9	2	11	8	6	4	4	5	8	6	2	7	6	0	20	115
sp|P61964|WDR5_HUMAN WD repeat-containing protein 5 OS=Homo sapiens (Human) OX=9606 GN=WDR5 PE=1 SV=1	23	4	17	22	10	7	12	20	8	19	27	35	1	11	14	40	24	10	9	21	0	20	334
sp|Q8NC74|RB8NL_HUMAN RBBP8 N-terminal-like protein OS=Homo sapiens (Human) OX=9606 GN=RBBP8NL PE=2 SV=3	59	54	16	28	8	35	65	55	19	9	72	29	9	5	84	62	36	4	1	14	0	20	664
sp|Q9UGP5|DPOLL_HUMAN DNA polymerase lambda OS=Homo sapiens (Human) OX=9606 GN=POLL PE=1 SV=1	54	40	9	26	11	33	42	41	19	27	58	30	7	15	41	44	26	7	13	32	0	20	575
sp|Q8NEU8|DP13B_HUMAN DCC-interacting protein 13-beta OS=Homo sapiens (Human) OX=9606 GN=APPL2 PE=1 SV=3	54	29	35	34	9	46	62	30	9	34	69	37	22	25	25	48	39	2	17	38	0	20	664
sp|Q13454|TUSC3_HUMAN Tumor suppressor candidate 3 OS=Homo sapiens (Human) OX=9606 GN=TUSC3 PE=1 SV=1	26	27	17	11	6	17	12	25	8	19	38	16	13	24	16	25	11	5	13	19	0	20	348
sp|Q9GZQ6|NPFF1_HUMAN Neuropeptide FF receptor 1 OS=Homo sapiens (Human) OX=9606 GN=NPFFR1 PE=2 SV=1	42	31	16	8	10	8	16	25	15	19	50	7	14	23	34	31	24	9	13	35	0	20	430
sp|Q8NE63|HIPK4_HUMAN Homeodomain-interacting protein kinase 4 OS=Homo sapiens (Human) OX=9606 GN=HIPK4 PE=1 SV=1	50	42	17	30	12	22	52	37	26	26	64	29	15	24	45	45	24	8	17	31	0	20	616
sp|Q8N271|PROM2_HUMAN Prominin-2 OS=Homo sapiens (Human) OX=9606 GN=PROM2 PE=1 SV=1	83	45	26	24	22	61	56	49	17	22	132	22	12	30	36	60	36	13	16	72	0	20	834
sp|Q01664|TFAP4_HUMAN Transcription factor AP-4 OS=Homo sapiens (Human) OX=9606 GN=TFAP4 PE=1 SV=2	18	28	8	15	2	36	39	11	9	20	29	17	9	5	25	27	18	1	3	18	0	20	338
sp|O00764|PDXK_HUMAN Pyridoxal kinase OS=Homo sapiens (Human) OX=9606 GN=PDXK PE=1 SV=1	18	18	13	18	4	18	21	19	9	14	32	14	12	7	15	19	13	3	10	35	0	20	312
sp|Q5T200|ZC3HD_HUMAN Zinc finger CCCH domain-containing protein 13 OS=Homo sapiens (Human) OX=9606 GN=ZC3H13 PE=1 SV=1	59	280	46	155	12	57	213	69	47	44	78	133	18	16	88	195	83	9	23	43	0	20	1668
sp|Q0VAA2|LR74A_HUMAN Leucine-rich repeat-containing protein 74A OS=Homo sapiens (Human) OX=9606 GN=LRRC74A PE=2 SV=2	24	16	35	23	7	18	40	32	9	29	60	32	20	19	20	36	21	3	11	33	0	20	488
sp|Q8IY84|NIM1_HUMAN Serine/threonine-protein kinase NIM1 OS=Homo sapiens (Human) OX=9606 GN=NIM1K PE=1 SV=1	13	27	12	16	6	16	40	33	16	30	39	33	13	14	21	33	26	3	15	30	0	20	436
sp|O60240|PLIN1_HUMAN Perilipin-1 OS=Homo sapiens (Human) OX=9606 GN=PLIN1 PE=1 SV=2	66	37	10	19	5	21	45	33	10	10	52	21	9	8	44	46	32	6	7	41	0	20	522
sp|A8MZ36|EVPLL_HUMAN Envoplakin-like protein OS=Homo sapiens (Human) OX=9606 GN=EVPLL PE=2 SV=1	29	27	4	14	7	33	33	23	14	8	29	10	5	3	17	13	10	4	4	14	0	20	301
sp|Q8NFR3|SPTSB_HUMAN Serine palmitoyltransferase small subunit B OS=Homo sapiens (Human) OX=9606 GN=SPTSSB PE=1 SV=1	4	4	2	1	3	2	4	1	2	10	6	2	3	5	2	6	4	3	7	5	0	20	76
sp|Q9H061|T126A_HUMAN Transmembrane protein 126A OS=Homo sapiens (Human) OX=9606 GN=TMEM126A PE=1 SV=1	14	10	13	4	4	5	9	15	3	16	29	10	4	8	10	12	12	1	7	9	0	20	195
sp|O60739|EIF1B_HUMAN Eukaryotic translation initiation factor 1b OS=Homo sapiens (Human) OX=9606 GN=EIF1B PE=1 SV=2	6	4	4	9	2	10	7	9	3	9	9	12	1	6	3	2	7	0	3	7	0	19	113
sp|Q5VXU1|NKAI2_HUMAN Sodium/potassium-transporting ATPase subunit beta-1-interacting protein 2 OS=Homo sapiens (Human) OX=9606 GN=NKAIN2 PE=2 SV=1	10	6	4	8	9	10	10	16	5	19	20	4	6	12	8	12	12	7	14	16	0	20	208
sp|O15211|RGL2_HUMAN Ral guanine nucleotide dissociation stimulator-like 2 OS=Homo sapiens (Human) OX=9606 GN=RGL2 PE=1 SV=1	61	64	12	39	9	25	57	70	17	17	92	19	8	20	68	87	40	8	11	53	0	20	777
sp|Q9H609|ZN576_HUMAN Zinc finger protein 576 OS=Homo sapiens (Human) OX=9606 GN=ZNF576 PE=1 SV=1	16	12	3	6	9	13	10	11	10	5	9	9	4	10	16	9	12	0	1	5	0	19	170
sp|O14492|SH2B2_HUMAN SH2B adapter protein 2 OS=Homo sapiens (Human) OX=9606 GN=SH2B2 PE=1 SV=2	89	49	13	32	12	19	45	42	19	11	50	15	8	23	56	59	30	8	9	43	0	20	632
sp|Q14938|NFIX_HUMAN Nuclear factor 1 X-type OS=Homo sapiens (Human) OX=9606 GN=NFIX PE=1 SV=2	30	26	14	28	9	25	19	34	15	19	40	29	6	24	51	59	28	6	12	28	0	20	502
sp|Q9NUR3|TM74B_HUMAN Transmembrane protein 74B OS=Homo sapiens (Human) OX=9606 GN=TMEM74B PE=2 SV=1	18	21	8	7	3	8	19	26	5	5	30	5	7	7	23	25	12	0	7	20	0	19	256
sp|Q9P2G3|KLH14_HUMAN Kelch-like protein 14 OS=Homo sapiens (Human) OX=9606 GN=KLHL14 PE=1 SV=2	32	29	28	33	18	37	32	41	20	21	77	28	16	17	44	47	25	11	27	45	0	20	628
sp|P63000|RAC1_HUMAN Ras-related C3 botulinum toxin substrate 1 OS=Homo sapiens (Human) OX=9606 GN=RAC1 PE=1 SV=1	13	9	6	12	7	5	9	11	2	10	21	17	3	6	14	7	13	2	8	17	0	20	192
sp|P62306|RUXF_HUMAN Small nuclear ribonucleoprotein F OS=Homo sapiens (Human) OX=9606 GN=SNRPF PE=1 SV=1	2	3	6	3	1	1	11	10	1	3	11	5	6	1	4	3	2	1	5	7	0	20	86
sp|Q96DM1|PGBD4_HUMAN PiggyBac transposable element-derived protein 4 OS=Homo sapiens (Human) OX=9606 GN=PGBD4 PE=2 SV=3	26	39	29	39	13	20	28	30	16	26	58	48	18	31	30	47	33	6	16	32	0	20	585
sp|Q9Y287|ITM2B_HUMAN Integral membrane protein 2B OS=Homo sapiens (Human) OX=9606 GN=ITM2B PE=1 SV=1	22	9	12	19	9	7	21	10	6	24	24	19	5	13	15	9	9	2	13	18	0	20	266
sp|A8MTL3|R212B_HUMAN RING finger protein 212B OS=Homo sapiens (Human) OX=9606 GN=RNF212B PE=2 SV=1	16	21	7	6	8	22	15	19	11	9	24	17	4	17	18	41	22	3	7	13	0	20	300
sp|Q9NWS6|F118A_HUMAN Protein FAM118A OS=Homo sapiens (Human) OX=9606 GN=FAM118A PE=1 SV=2	21	19	9	31	9	19	22	21	11	13	40	25	10	14	13	22	17	2	9	30	0	20	357
sp|P11464|PSG1_HUMAN Pregnancy-specific beta-1-glycoprotein 1 OS=Homo sapiens (Human) OX=9606 GN=PSG1 PE=1 SV=1	15	22	25	15	7	11	23	25	7	24	45	19	6	8	33	38	39	9	24	24	0	20	419
sp|Q06732|ZN33B_HUMAN Zinc finger protein 33B OS=Homo sapiens (Human) OX=9606 GN=ZNF33B PE=1 SV=2	16	34	40	21	49	43	74	46	57	22	48	80	7	42	25	58	55	6	28	27	0	20	778
sp|O60543|CIDEA_HUMAN Cell death activator CIDE-A OS=Homo sapiens (Human) OX=9606 GN=CIDEA PE=1 SV=1	12	18	4	11	4	8	10	16	4	8	27	10	9	11	10	17	17	1	8	14	0	20	219
sp|O15315|RA51B_HUMAN DNA repair protein RAD51 homolog 2 OS=Homo sapiens (Human) OX=9606 GN=RAD51B PE=1 SV=2	29	17	8	12	12	19	31	22	8	22	54	17	8	14	16	38	26	2	8	21	0	20	384
sp|A0A578|TVB51_HUMAN T cell receptor beta variable 5-1 OS=Homo sapiens (Human) OX=9606 GN=TRBV5-1 PE=1 SV=1	4	8	4	1	4	9	4	12	1	2	15	3	2	6	5	15	7	2	4	6	0	20	114
sp|P36402|TCF7_HUMAN Transcription factor 7 OS=Homo sapiens (Human) OX=9606 GN=TCF7 PE=1 SV=3	38	18	10	16	2	22	32	37	15	8	35	25	10	8	39	33	13	4	10	9	0	20	384
sp|P35244|RFA3_HUMAN Replication protein A 14 kDa subunit OS=Homo sapiens (Human) OX=9606 GN=RPA3 PE=1 SV=1	5	4	3	9	2	4	9	10	4	11	10	7	6	7	7	5	5	0	3	10	0	19	121
sp|Q9HAV7|GRPE1_HUMAN GrpE protein homolog 1, mitochondrial OS=Homo sapiens (Human) OX=9606 GN=GRPEL1 PE=1 SV=2	19	10	6	8	4	12	24	11	5	3	30	24	3	4	12	7	12	0	5	18	0	19	217
sp|Q5UE93|PI3R6_HUMAN Phosphoinositide 3-kinase regulatory subunit 6 OS=Homo sapiens (Human) OX=9606 GN=PIK3R6 PE=1 SV=1	58	57	13	34	15	39	52	41	19	31	98	30	14	21	57	53	44	8	19	51	0	20	754
sp|O60884|DNJA2_HUMAN DnaJ homolog subfamily A member 2 OS=Homo sapiens (Human) OX=9606 GN=DNAJA2 PE=1 SV=1	16	24	18	24	11	21	38	50	11	18	29	32	11	15	20	24	9	1	12	28	0	20	412
tr|Q6JHZ5|Q6JHZ5_HUMAN NS5ATP13TP1 OS=Homo sapiens (Human) OX=9606 GN=ENSG00000277005 PE=2 SV=1	3	8	4	3	2	6	6	19	2	1	19	6	1	7	8	10	4	2	0	10	0	19	121
sp|A1L443|NTM2F_HUMAN NUT family member 2F OS=Homo sapiens (Human) OX=9606 GN=NUTM2F PE=2 SV=2	66	46	7	22	11	49	54	67	17	10	70	35	13	15	116	61	33	9	8	47	0	20	756
sp|Q8N0W5|IQCK_HUMAN IQ domain-containing protein K OS=Homo sapiens (Human) OX=9606 GN=IQCK PE=2 SV=1	18	14	4	6	9	17	29	4	8	15	20	25	6	17	29	22	15	6	6	17	0	20	287
sp|O15212|PFD6_HUMAN Prefoldin subunit 6 OS=Homo sapiens (Human) OX=9606 GN=PFDN6 PE=1 SV=1	13	8	3	4	0	17	15	8	0	4	18	13	2	2	2	6	4	0	3	7	0	17	129
sp|Q13557|KCC2D_HUMAN Calcium/calmodulin-dependent protein kinase type II subunit delta OS=Homo sapiens (Human) OX=9606 GN=CAMK2D PE=1 SV=3	38	25	20	27	11	19	36	31	18	33	42	36	11	20	25	28	30	8	15	26	0	20	499
sp|Q9UNZ2|NSF1C_HUMAN NSFL1 cofactor p47 OS=Homo sapiens (Human) OX=9606 GN=NSFL1C PE=1 SV=2	38	26	11	24	0	20	37	29	8	15	28	17	4	17	17	33	17	2	5	22	0	19	370
sp|A6NMD0|IFM10_HUMAN Interferon-induced transmembrane protein 10 OS=Homo sapiens (Human) OX=9606 GN=IFITM10 PE=2 SV=1	29	10	7	10	8	5	12	13	1	9	21	12	4	11	26	15	14	3	7	11	0	20	228
sp|P42229|STA5A_HUMAN Signal transducer and activator of transcription 5A OS=Homo sapiens (Human) OX=9606 GN=STAT5A PE=1 SV=1	57	41	36	40	10	75	55	37	20	37	90	42	13	31	39	48	37	16	19	51	0	20	794
sp|P51460|INSL3_HUMAN Insulin-like 3 OS=Homo sapiens (Human) OX=9606 GN=INSL3 PE=1 SV=2	13	13	2	4	6	5	5	11	9	0	22	1	2	2	13	4	8	3	2	6	0	19	131
sp|Q5JTH9|RRP12_HUMAN RRP12-like protein OS=Homo sapiens (Human) OX=9606 GN=RRP12 PE=1 SV=2	128	81	24	49	25	49	105	75	38	44	155	96	30	48	61	98	68	11	21	91	0	20	1297
sp|Q15438|CYH1_HUMAN Cytohesin-1 OS=Homo sapiens (Human) OX=9606 GN=CYTH1 PE=1 SV=1	21	27	27	27	8	15	42	20	6	26	36	32	9	19	16	14	19	5	12	17	0	20	398
sp|Q8N535|CB052_HUMAN Putative uncharacterized protein encoded by LINC00471 OS=Homo sapiens (Human) OX=9606 GN=LINC00471 PE=5 SV=1	5	8	5	7	7	2	15	7	3	1	7	10	2	4	5	11	4	0	0	5	0	18	108
sp|Q8N0V3|RBFA_HUMAN Putative ribosome-binding factor A, mitochondrial OS=Homo sapiens (Human) OX=9606 GN=RBFA PE=1 SV=3	32	25	9	21	9	14	27	23	8	3	40	25	7	9	15	28	18	6	9	15	0	20	343
sp|A2RUS2|DEND3_HUMAN DENN domain-containing protein 3 OS=Homo sapiens (Human) OX=9606 GN=DENND3 PE=1 SV=2	72	59	37	64	34	54	78	55	43	48	141	75	38	48	68	83	63	18	30	90	0	20	1198
sp|Q7Z3S7|CA2D4_HUMAN Voltage-dependent calcium channel subunit alpha-2/delta-4 OS=Homo sapiens (Human) OX=9606 GN=CACNA2D4 PE=1 SV=2	81	52	49	69	23	42	76	60	26	47	127	54	29	51	59	82	62	22	36	90	0	20	1137
sp|Q6UQ28|PLET1_HUMAN Placenta-expressed transcript 1 protein OS=Homo sapiens (Human) OX=9606 GN=PLET1 PE=2 SV=2	18	5	7	8	3	10	11	3	2	14	25	9	6	13	9	22	16	2	11	13	0	20	207
sp|Q9Y6R9|CCD61_HUMAN Coiled-coil domain-containing protein 61 OS=Homo sapiens (Human) OX=9606 GN=CCDC61 PE=1 SV=3	39	70	12	23	4	27	42	44	10	11	49	20	10	11	29	58	18	5	9	21	0	20	512
sp|Q2TAA2|IAH1_HUMAN Isoamyl acetate-hydrolyzing esterase 1 homolog OS=Homo sapiens (Human) OX=9606 GN=IAH1 PE=1 SV=1	18	10	11	16	8	11	13	17	4	13	37	12	3	9	13	19	8	7	6	13	0	20	248
sp|Q9NQV7|PRDM9_HUMAN Histone-lysine N-methyltransferase PRDM9 OS=Homo sapiens (Human) OX=9606 GN=PRDM9 PE=1 SV=2	29	90	27	29	40	48	77	77	43	22	57	63	12	28	47	68	48	16	32	41	0	20	894
sp|Q15431|SYCP1_HUMAN Synaptonemal complex protein 1 OS=Homo sapiens (Human) OX=9606 GN=SYCP1 PE=1 SV=2	43	36	55	39	11	60	154	17	14	43	113	141	16	23	19	64	63	4	21	40	0	20	976
sp|Q9HCH3|CPNE5_HUMAN Copine-5 OS=Homo sapiens (Human) OX=9606 GN=CPNE5 PE=1 SV=2	41	28	27	42	11	23	30	39	12	32	44	33	16	32	36	47	35	3	19	43	0	20	593
sp|Q9NZQ9|TMOD4_HUMAN Tropomodulin-4 OS=Homo sapiens (Human) OX=9606 GN=TMOD4 PE=2 SV=1	26	23	18	21	6	22	41	11	2	18	36	18	13	5	22	19	17	1	10	16	0	20	345
sp|P48681|NEST_HUMAN Nestin OS=Homo sapiens (Human) OX=9606 GN=NES PE=1 SV=2	128	99	38	63	8	111	293	149	14	22	182	58	15	23	129	124	61	22	6	76	0	20	1621
tr|X5D2U9|X5D2U9_HUMAN Ig-like domain-containing protein OS=Homo sapiens (Human) OX=9606 GN=HLA-DRB4 PE=3 SV=1	12	16	11	6	7	17	18	23	5	5	30	8	6	10	12	20	18	5	13	24	0	20	266
sp|O60294|TYW4_HUMAN tRNA wybutosine-synthesizing protein 4 OS=Homo sapiens (Human) OX=9606 GN=LCMT2 PE=1 SV=3	66	50	17	25	16	29	45	57	24	21	79	11	7	35	39	56	31	13	17	48	0	20	686
sp|Q99576|T22D3_HUMAN TSC22 domain family protein 3 OS=Homo sapiens (Human) OX=9606 GN=TSC22D3 PE=1 SV=2	10	3	7	4	1	8	17	5	2	5	14	7	5	4	8	14	4	0	3	13	0	19	134
sp|P48539|PCP4_HUMAN Calmodulin regulator protein PCP4 OS=Homo sapiens (Human) OX=9606 GN=PCP4 PE=1 SV=3	7	3	2	5	0	7	6	6	0	2	0	8	2	3	1	5	3	0	0	2	0	15	62
tr|Q9H3A6|Q9H3A6_HUMAN PRO2179 OS=Homo sapiens (Human) OX=9606 GN=ENSG00000269823 PE=2 SV=1	9	14	0	5	4	10	8	20	3	1	20	4	1	8	10	9	3	5	2	4	0	19	140
sp|Q9NW15|ANO10_HUMAN Anoctamin-10 OS=Homo sapiens (Human) OX=9606 GN=ANO10 PE=1 SV=2	47	28	27	23	9	24	49	28	9	41	91	44	21	42	24	36	30	11	33	43	0	20	660
sp|Q8N8Z6|DCBD1_HUMAN Discoidin, CUB and LCCL domain-containing protein 1 OS=Homo sapiens (Human) OX=9606 GN=DCBLD1 PE=1 SV=2	52	39	25	39	13	34	34	65	19	33	55	38	11	22	43	70	51	8	25	39	0	20	715
sp|O94898|LRIG2_HUMAN Leucine-rich repeats and immunoglobulin-like domains protein 2 OS=Homo sapiens (Human) OX=9606 GN=LRIG2 PE=2 SV=3	65	52	67	52	25	49	69	58	28	66	131	36	25	36	56	95	65	15	26	49	0	20	1065
sp|Q9H079|KTBL1_HUMAN KATNB1-like protein 1 OS=Homo sapiens (Human) OX=9606 GN=KATNBL1 PE=1 SV=1	12	14	19	13	8	14	19	14	10	15	34	29	5	9	12	28	12	5	10	22	0	20	304
sp|Q96BD0|SO4A1_HUMAN Solute carrier organic anion transporter family member 4A1 OS=Homo sapiens (Human) OX=9606 GN=SLCO4A1 PE=1 SV=2	66	27	16	20	29	27	20	72	15	30	91	18	13	40	46	68	44	12	24	44	0	20	722
sp|A0A0K2S4Q6|CD3CH_HUMAN Protein CD300H OS=Homo sapiens (Human) OX=9606 GN=CD300H PE=1 SV=1	11	8	4	7	8	9	10	15	2	7	26	6	4	6	16	20	17	5	4	16	0	20	201
sp|D6RCP7|U17LJ_HUMAN Ubiquitin carboxyl-terminal hydrolase 17-like protein 19 OS=Homo sapiens (Human) OX=9606 GN=USP17L19 PE=3 SV=1	42	28	17	23	17	37	32	28	29	14	55	32	12	13	26	41	32	6	17	29	0	20	530
sp|P06681|CO2_HUMAN Complement C2 OS=Homo sapiens (Human) OX=9606 GN=C2 PE=1 SV=2	43	41	43	38	24	30	39	62	19	32	73	36	20	32	42	64	37	13	16	48	0	20	752
sp|Q6P1N0|C2D1A_HUMAN Coiled-coil and C2 domain-containing protein 1A OS=Homo sapiens (Human) OX=9606 GN=CC2D1A PE=1 SV=1	106	73	20	50	7	65	77	60	12	30	94	57	17	23	105	45	48	2	12	48	0	20	951
sp|Q9HCN3|TMM8A_HUMAN Post-GPI attachment to proteins factor 6 OS=Homo sapiens (Human) OX=9606 GN=TMEM8A PE=1 SV=3	67	44	23	28	29	31	25	44	14	20	95	11	18	31	60	72	49	17	29	64	0	20	771
sp|O14908|GIPC1_HUMAN PDZ domain-containing protein GIPC1 OS=Homo sapiens (Human) OX=9606 GN=GIPC1 PE=1 SV=2	25	24	6	19	2	7	29	45	7	16	36	19	8	15	23	12	16	1	5	18	0	20	333
sp|Q8WWH5|TRUB1_HUMAN Probable tRNA pseudouridine synthase 1 OS=Homo sapiens (Human) OX=9606 GN=TRUB1 PE=1 SV=1	38	14	5	14	5	10	27	25	4	14	37	30	7	8	19	32	29	2	6	23	0	20	349
sp|Q9BRP9|YK016_HUMAN Putative uncharacterized protein MGC13053 OS=Homo sapiens (Human) OX=9606 GN=- PE=5 SV=2	15	13	2	4	3	10	10	20	3	2	5	4	3	3	13	10	13	4	1	9	0	20	147
sp|Q9UK97|FBX9_HUMAN F-box only protein 9 OS=Homo sapiens (Human) OX=9606 GN=FBXO9 PE=1 SV=1	27	35	9	28	9	27	37	17	10	22	38	22	11	23	21	33	23	8	21	26	0	20	447
sp|P38398|BRCA1_HUMAN Breast cancer type 1 susceptibility protein OS=Homo sapiens (Human) OX=9606 GN=BRCA1 PE=1 SV=2	84	76	121	85	44	97	198	87	49	77	156	137	30	49	96	224	111	10	31	101	0	20	1863
sp|Q9UJY5|GGA1_HUMAN ADP-ribosylation factor-binding protein GGA1 OS=Homo sapiens (Human) OX=9606 GN=GGA1 PE=1 SV=1	43	28	25	32	5	35	50	29	8	23	76	37	18	16	65	60	37	6	9	37	0	20	639
sp|Q96LA5|FCRL2_HUMAN Fc receptor-like protein 2 OS=Homo sapiens (Human) OX=9606 GN=FCRL2 PE=1 SV=1	31	20	19	19	10	31	30	39	8	23	49	24	6	19	26	62	24	9	15	44	0	20	508
sp|Q5VW22|AGAP6_HUMAN Arf-GAP with GTPase, ANK repeat and PH domain-containing protein 6 OS=Homo sapiens (Human) OX=9606 GN=AGAP6 PE=2 SV=1	45	30	29	30	21	34	43	35	21	33	56	37	18	12	35	79	47	11	13	34	0	20	663
sp|Q8NGS5|O13C4_HUMAN Olfactory receptor 13C4 OS=Homo sapiens (Human) OX=9606 GN=OR13C4 PE=3 SV=1	19	10	17	8	8	6	5	17	4	34	42	14	14	24	10	28	17	2	14	25	0	20	318
sp|O76027|ANXA9_HUMAN Annexin A9 OS=Homo sapiens (Human) OX=9606 GN=ANXA9 PE=1 SV=3	35	24	10	21	4	30	22	18	5	17	46	13	5	11	9	25	21	2	7	20	0	20	345
sp|Q8IV56|PRR15_HUMAN Proline-rich protein 15 OS=Homo sapiens (Human) OX=9606 GN=PRR15 PE=2 SV=1	11	9	4	7	0	3	9	14	2	1	7	12	1	2	20	16	4	3	1	3	0	19	129
tr|K7RE56|K7RE56_HUMAN KIR2DS3 OS=Homo sapiens (Human) OX=9606 GN=KIR2DS3 PE=4 SV=1	15	15	10	14	6	10	16	25	13	9	27	10	7	16	22	37	17	7	9	19	0	20	304
sp|A8MZ59|LEUTX_HUMAN Leucine-twenty homeobox OS=Homo sapiens (Human) OX=9606 GN=LEUTX PE=2 SV=3	12	7	7	11	2	13	8	8	2	9	14	10	3	4	12	21	9	4	4	8	0	20	168
sp|Q96IU2|ZBED3_HUMAN Zinc finger BED domain-containing protein 3 OS=Homo sapiens (Human) OX=9606 GN=ZBED3 PE=1 SV=1	36	32	0	9	6	9	22	28	6	1	22	2	3	2	26	11	6	5	2	6	0	19	234
sp|Q86UG4|SO6A1_HUMAN Solute carrier organic anion transporter family member 6A1 OS=Homo sapiens (Human) OX=9606 GN=SLCO6A1 PE=2 SV=2	46	28	26	26	35	17	32	57	5	65	74	53	13	43	30	54	39	8	22	46	0	20	719
sp|Q10586|DBP_HUMAN D site-binding protein OS=Homo sapiens (Human) OX=9606 GN=DBP PE=1 SV=1	39	27	4	13	2	9	23	31	7	4	34	15	3	6	47	25	14	2	5	15	0	20	325
sp|O00443|P3C2A_HUMAN Phosphatidylinositol 4-phosphate 3-kinase C2 domain-containing subunit alpha OS=Homo sapiens (Human) OX=9606 GN=PIK3C2A PE=1 SV=2	96	76	74	89	28	84	101	75	38	87	197	122	29	78	88	148	100	19	53	104	0	20	1686
sp|Q96RD7|PANX1_HUMAN Pannexin-1 OS=Homo sapiens (Human) OX=9606 GN=PANX1 PE=1 SV=4	27	12	19	19	11	18	25	18	4	30	61	28	10	23	17	38	15	5	17	29	0	20	426
sp|Q8NEH6|MNS1_HUMAN Meiosis-specific nuclear structural protein 1 OS=Homo sapiens (Human) OX=9606 GN=MNS1 PE=2 SV=2	35	41	23	19	3	54	92	5	6	22	54	69	21	11	1	8	4	2	12	13	0	20	495
sp|P52294|IMA5_HUMAN Importin subunit alpha-5 OS=Homo sapiens (Human) OX=9606 GN=KPNA1 PE=1 SV=3	42	25	29	25	13	34	47	27	5	38	57	28	12	20	23	38	26	7	10	32	0	20	538
sp|Q9H5J8|TAF1D_HUMAN TATA box-binding protein-associated factor RNA polymerase I subunit D OS=Homo sapiens (Human) OX=9606 GN=TAF1D PE=1 SV=1	14	23	12	21	2	6	28	13	5	15	18	30	3	15	14	30	11	1	8	9	0	20	278
sp|O75487|GPC4_HUMAN Glypican-4 OS=Homo sapiens (Human) OX=9606 GN=GPC4 PE=1 SV=4	43	27	34	32	19	24	36	32	10	16	51	37	18	29	21	44	19	5	18	41	0	20	556
sp|Q2TAL6|VWC2_HUMAN Brorin OS=Homo sapiens (Human) OX=9606 GN=VWC2 PE=1 SV=1	30	22	5	12	29	16	33	28	5	8	18	14	5	5	31	18	16	4	8	18	0	20	325
sp|P32455|GBP1_HUMAN Guanylate-binding protein 1 OS=Homo sapiens (Human) OX=9606 GN=GBP1 PE=1 SV=2	35	27	20	31	9	46	57	25	10	28	66	54	18	23	20	41	30	4	16	32	0	20	592
sp|Q9NQT6|FSCN3_HUMAN Fascin-3 OS=Homo sapiens (Human) OX=9606 GN=FSCN3 PE=2 SV=1	27	39	16	19	21	20	26	42	25	22	54	8	12	27	22	38	27	12	16	25	0	20	498
sp|O95319|CELF2_HUMAN CUGBP Elav-like family member 2 OS=Homo sapiens (Human) OX=9606 GN=CELF2 PE=1 SV=1	63	16	32	17	8	45	17	41	6	20	50	26	21	19	23	41	33	2	10	18	0	20	508
sp|Q96P16|RPR1A_HUMAN Regulation of nuclear pre-mRNA domain-containing protein 1A OS=Homo sapiens (Human) OX=9606 GN=RPRD1A PE=1 SV=1	23	23	10	19	4	14	31	9	9	11	39	27	5	7	12	29	10	3	7	20	0	20	312
sp|Q9H334|FOXP1_HUMAN Forkhead box protein P1 OS=Homo sapiens (Human) OX=9606 GN=FOXP1 PE=1 SV=1	52	24	31	19	8	91	44	29	27	18	71	28	20	12	47	58	44	5	11	38	0	20	677
sp|P50151|GBG10_HUMAN Guanine nucleotide-binding protein G(I)/G(S)/G(O) subunit gamma-10 OS=Homo sapiens (Human) OX=9606 GN=GNG10 PE=1 SV=1	11	4	2	1	3	6	5	4	0	1	9	3	2	1	3	7	0	0	1	5	0	17	68
sp|O14893|GEMI2_HUMAN Gem-associated protein 2 OS=Homo sapiens (Human) OX=9606 GN=GEMIN2 PE=1 SV=1	20	19	8	15	8	19	22	12	3	8	33	13	5	7	23	21	10	6	6	22	0	20	280
sp|A4FU49|SH321_HUMAN SH3 domain-containing protein 21 OS=Homo sapiens (Human) OX=9606 GN=SH3D21 PE=2 SV=2	39	38	13	28	3	30	75	31	9	13	45	53	10	9	89	58	43	4	8	42	0	20	640
sp|Q86X19|TMM17_HUMAN Transmembrane protein 17 OS=Homo sapiens (Human) OX=9606 GN=TMEM17 PE=1 SV=2	10	12	10	6	1	7	12	8	3	15	34	5	9	14	9	13	7	3	8	12	0	20	198
sp|Q16576|RBBP7_HUMAN Histone-binding protein RBBP7 OS=Homo sapiens (Human) OX=9606 GN=RBBP7 PE=1 SV=1	26	10	22	33	6	12	36	25	23	22	35	24	7	14	20	36	25	14	8	27	0	20	425
sp|Q9UH03|SEPT3_HUMAN Neuronal-specific septin-3 OS=Homo sapiens (Human) OX=9606 GN=SEPTIN3 PE=1 SV=3	13	18	19	16	5	10	36	23	8	26	28	33	11	13	24	16	22	3	8	26	0	20	358
sp|P46109|CRKL_HUMAN Crk-like protein OS=Homo sapiens (Human) OX=9606 GN=CRKL PE=1 SV=1	20	18	16	16	2	12	19	21	8	15	20	14	6	11	30	24	15	4	12	20	0	20	303
sp|Q9NYZ2|MFRN1_HUMAN Mitoferrin-1 OS=Homo sapiens (Human) OX=9606 GN=SLC25A37 PE=2 SV=2	34	20	17	10	3	17	13	28	11	16	26	11	17	12	13	28	23	3	17	19	0	20	338
sp|Q9BZX4|ROP1B_HUMAN Ropporin-1B OS=Homo sapiens (Human) OX=9606 GN=ROPN1B PE=1 SV=1	17	11	8	8	6	9	19	10	3	15	24	9	5	9	13	9	13	5	4	15	0	20	212
sp|O14827|RGRF2_HUMAN Ras-specific guanine nucleotide-releasing factor 2 OS=Homo sapiens (Human) OX=9606 GN=RASGRF2 PE=1 SV=2	85	80	50	66	26	57	92	50	36	74	134	78	30	49	61	96	67	11	32	63	0	20	1237
sp|Q8NBP5|MFSD9_HUMAN Major facilitator superfamily domain-containing protein 9 OS=Homo sapiens (Human) OX=9606 GN=MFSD9 PE=2 SV=2	44	23	10	10	7	10	19	45	9	20	78	16	11	21	18	46	26	6	11	44	0	20	474
sp|Q8WZ75|ROBO4_HUMAN Roundabout homolog 4 OS=Homo sapiens (Human) OX=9606 GN=ROBO4 PE=1 SV=1	90	65	19	40	18	49	53	83	23	20	120	18	16	15	117	121	48	24	13	55	0	20	1007
sp|Q8N7Z5|ANR31_HUMAN Ankyrin repeat domain-containing protein 31 OS=Homo sapiens (Human) OX=9606 GN=ANKRD31 PE=2 SV=2	98	75	123	112	37	99	166	79	60	93	188	159	33	44	83	189	93	12	39	91	0	20	1873
sp|P10114|RAP2A_HUMAN Ras-related protein Rap-2a OS=Homo sapiens (Human) OX=9606 GN=RAP2A PE=1 SV=1	10	9	5	12	4	10	17	11	0	12	11	12	6	8	7	15	8	1	7	18	0	19	183
sp|P0CJ72|HMN5_HUMAN Humanin-like 5 OS=Homo sapiens (Human) OX=9606 GN=MTRNR2L5 PE=2 SV=1	1	2	0	1	1	0	1	1	0	1	4	1	2	1	2	3	2	0	0	1	0	15	24
sp|Q96IX9|A26L1_HUMAN Putative ankyrin repeat domain-containing protein 26-like 1 OS=Homo sapiens (Human) OX=9606 GN=ANKRD36BP1 PE=5 SV=1	4	7	5	7	0	8	13	3	7	10	15	16	3	1	0	6	10	1	2	1	0	18	119
sp|Q14566|MCM6_HUMAN DNA replication licensing factor MCM6 OS=Homo sapiens (Human) OX=9606 GN=MCM6 PE=1 SV=1	54	58	31	49	17	35	82	43	19	52	77	44	12	32	29	59	40	3	22	63	0	20	821
sp|Q9UBJ2|ABCD2_HUMAN ATP-binding cassette sub-family D member 2 OS=Homo sapiens (Human) OX=9606 GN=ABCD2 PE=1 SV=1	63	35	19	32	10	26	45	46	21	54	77	57	24	23	27	48	43	11	32	47	0	20	740
sp|Q8N8J0|PI4P1_HUMAN Putative inactive phosphatidylinositol 4-kinase alpha-like protein P1 OS=Homo sapiens (Human) OX=9606 GN=PI4KAP1 PE=5 SV=1	20	11	8	14	5	11	16	13	3	16	23	19	6	15	20	24	12	2	8	16	0	20	262
sp|Q9NYM9|BET1L_HUMAN BET1-like protein OS=Homo sapiens (Human) OX=9606 GN=BET1L PE=1 SV=1	12	11	3	11	1	3	4	6	0	4	13	5	6	5	1	12	6	1	2	5	0	19	111
tr|A0A075B6H5|A0A075B6H5_HUMAN Ig-like domain-containing protein OS=Homo sapiens (Human) OX=9606 GN=TRBV20OR9-2 PE=4 SV=1	6	7	4	3	3	5	7	9	3	4	15	6	5	5	7	16	11	1	3	10	0	20	130
sp|P06870|KLK1_HUMAN Kallikrein-1 OS=Homo sapiens (Human) OX=9606 GN=KLK1 PE=1 SV=2	15	6	9	17	11	12	17	22	11	9	27	8	5	10	15	18	15	8	5	22	0	20	262
sp|Q96M66|YP010_HUMAN Putative uncharacterized protein FLJ32790 OS=Homo sapiens (Human) OX=9606 GN=- PE=2 SV=2	21	20	4	6	6	11	12	17	3	1	13	8	3	2	24	20	12	1	3	7	0	20	194
sp|Q7Z4I7|LIMS2_HUMAN LIM and senescent cell antigen-like-containing domain protein 2 OS=Homo sapiens (Human) OX=9606 GN=LIMS2 PE=1 SV=1	23	20	17	12	33	9	26	22	17	9	28	27	7	20	15	15	8	3	11	19	0	20	341
sp|Q15788|NCOA1_HUMAN Nuclear receptor coactivator 1 OS=Homo sapiens (Human) OX=9606 GN=NCOA1 PE=1 SV=3	79	64	92	67	23	135	68	92	21	57	128	55	50	34	124	172	87	4	22	67	0	20	1441
sp|Q8NGI3|O56B1_HUMAN Olfactory receptor 56B1 OS=Homo sapiens (Human) OX=9606 GN=OR56B1 PE=2 SV=2	27	9	12	7	10	10	9	10	9	33	54	11	10	16	15	30	16	5	10	21	0	20	324
sp|Q16777|H2A2C_HUMAN Histone H2A type 2-C OS=Homo sapiens (Human) OX=9606 GN=HIST2H2AC PE=1 SV=4	17	12	6	2	0	5	7	13	3	6	15	14	2	1	5	6	4	0	3	8	0	18	129
sp|Q9NRX2|RM17_HUMAN 39S ribosomal protein L17, mitochondrial OS=Homo sapiens (Human) OX=9606 GN=MRPL17 PE=1 SV=1	13	20	6	9	1	9	9	12	6	8	25	7	7	3	10	9	8	2	5	6	0	20	175
sp|Q5VUJ5|AGAP7_HUMAN Putative Arf-GAP with GTPase, ANK repeat and PH domain-containing protein 7 OS=Homo sapiens (Human) OX=9606 GN=AGAP7P PE=5 SV=1	44	31	28	31	20	33	44	36	21	35	57	36	16	12	34	77	49	11	14	34	0	20	663
sp|Q5EB52|MEST_HUMAN Mesoderm-specific transcript homolog protein OS=Homo sapiens (Human) OX=9606 GN=MEST PE=2 SV=2	12	27	12	15	1	11	12	24	12	21	47	12	6	20	23	25	11	8	16	20	0	20	335
sp|Q96N66|MBOA7_HUMAN Lysophospholipid acyltransferase 7 OS=Homo sapiens (Human) OX=9606 GN=MBOAT7 PE=1 SV=2	53	28	3	11	12	11	17	35	9	15	74	13	12	27	35	33	23	16	25	20	0	20	472
sp|Q96IT1|ZN496_HUMAN Zinc finger protein 496 OS=Homo sapiens (Human) OX=9606 GN=ZNF496 PE=1 SV=1	32	47	14	31	18	46	63	31	19	13	60	26	5	19	53	49	15	7	11	28	0	20	587
sp|Q8IYW2|CFA46_HUMAN Cilia- and flagella-associated protein 46 OS=Homo sapiens (Human) OX=9606 GN=CFAP46 PE=2 SV=3	276	162	68	101	61	147	237	142	78	89	359	171	64	72	127	195	105	42	56	163	0	20	2715
sp|O60312|AT10A_HUMAN Probable phospholipid-transporting ATPase VA OS=Homo sapiens (Human) OX=9606 GN=ATP10A PE=2 SV=2	108	106	50	61	39	64	89	85	35	56	181	63	27	67	76	143	85	20	41	103	0	20	1499
sp|O15516|CLOCK_HUMAN Circadian locomoter output cycles protein kaput OS=Homo sapiens (Human) OX=9606 GN=CLOCK PE=1 SV=1	37	37	28	33	9	102	46	36	30	38	71	35	25	34	46	105	65	5	19	45	0	20	846
sp|Q9P104|DOK5_HUMAN Docking protein 5 OS=Homo sapiens (Human) OX=9606 GN=DOK5 PE=1 SV=2	21	25	11	13	8	15	22	14	9	14	28	18	8	12	11	24	17	6	13	17	0	20	306
sp|Q7Z418|KCNKI_HUMAN Potassium channel subfamily K member 18 OS=Homo sapiens (Human) OX=9606 GN=KCNK18 PE=1 SV=1	22	15	10	14	15	14	23	20	6	25	48	21	7	35	24	23	19	4	13	26	0	20	384
sp|O94989|ARHGF_HUMAN Rho guanine nucleotide exchange factor 15 OS=Homo sapiens (Human) OX=9606 GN=ARHGEF15 PE=1 SV=4	65	77	18	32	17	48	56	52	17	14	99	18	8	20	107	83	48	8	11	43	0	20	841
sp|Q13873|BMPR2_HUMAN Bone morphogenetic protein receptor type-2 OS=Homo sapiens (Human) OX=9606 GN=BMPR2 PE=1 SV=2	59	58	68	50	23	44	73	60	26	46	91	46	28	20	63	99	81	12	28	63	0	20	1038
sp|O75376|NCOR1_HUMAN Nuclear receptor corepressor 1 OS=Homo sapiens (Human) OX=9606 GN=NCOR1 PE=1 SV=2	165	172	80	103	16	159	223	131	63	109	136	142	46	42	236	274	147	8	59	129	0	20	2440
sp|O94919|ENDD1_HUMAN Endonuclease domain-containing 1 protein OS=Homo sapiens (Human) OX=9606 GN=ENDOD1 PE=1 SV=2	40	23	14	23	13	21	29	37	3	28	56	24	10	25	24	38	27	7	16	42	0	20	500
sp|Q13002|GRIK2_HUMAN Glutamate receptor ionotropic, kainate 2 OS=Homo sapiens (Human) OX=9606 GN=GRIK2 PE=1 SV=1	56	43	39	44	12	32	53	59	15	58	93	57	31	48	38	68	57	16	32	57	0	20	908
sp|Q9UKA4|AKA11_HUMAN A-kinase anchor protein 11 OS=Homo sapiens (Human) OX=9606 GN=AKAP11 PE=1 SV=1	121	51	88	117	45	89	157	71	57	74	169	145	31	77	90	245	111	7	42	114	0	20	1901
sp|Q2M3R5|S35G1_HUMAN Solute carrier family 35 member G1 OS=Homo sapiens (Human) OX=9606 GN=SLC35G1 PE=1 SV=1	33	12	3	11	10	10	14	31	2	28	38	17	9	27	20	28	21	8	12	31	0	20	365
sp|Q9NRG4|SMYD2_HUMAN N-lysine methyltransferase SMYD2 OS=Homo sapiens (Human) OX=9606 GN=SMYD2 PE=1 SV=2	29	21	15	21	17	15	41	23	16	20	41	35	14	17	19	27	13	4	20	25	0	20	433
sp|Q6IB77|GLYAT_HUMAN Glycine N-acyltransferase OS=Homo sapiens (Human) OX=9606 GN=GLYAT PE=1 SV=3	14	8	16	11	7	23	14	15	11	13	31	20	13	12	19	19	16	6	11	17	0	20	296
sp|Q8ND25|ZNRF1_HUMAN E3 ubiquitin-protein ligase ZNRF1 OS=Homo sapiens (Human) OX=9606 GN=ZNRF1 PE=1 SV=2	19	13	3	14	9	3	9	32	10	7	15	6	8	7	17	27	10	2	7	9	0	20	227
sp|O75871|CEAM4_HUMAN Carcinoembryonic antigen-related cell adhesion molecule 4 OS=Homo sapiens (Human) OX=9606 GN=CEACAM4 PE=1 SV=2	27	10	8	9	3	11	9	21	8	15	25	4	1	5	21	20	19	3	10	15	0	20	244
sp|Q9HBG6|IF122_HUMAN Intraflagellar transport protein 122 homolog OS=Homo sapiens (Human) OX=9606 GN=IFT122 PE=1 SV=2	83	65	44	79	36	54	90	67	30	77	128	88	23	51	46	90	46	21	53	70	0	20	1241
sp|Q6IF82|O4A47_HUMAN Olfactory receptor 4A47 OS=Homo sapiens (Human) OX=9606 GN=OR4A47 PE=3 SV=2	11	9	10	8	10	8	6	17	7	24	43	11	13	26	13	28	17	3	12	33	0	20	309
sp|Q2M2E5|CE064_HUMAN Uncharacterized protein C5orf64 OS=Homo sapiens (Human) OX=9606 GN=C5orf64 PE=2 SV=2	7	7	5	2	4	5	7	6	3	6	14	10	6	8	14	7	7	0	5	7	0	19	130
sp|Q8IWN6|F223A_HUMAN Protein FAM223A OS=Homo sapiens (Human) OX=9606 GN=FAM223A PE=2 SV=1	5	10	6	6	4	5	3	10	6	5	12	7	5	3	7	11	5	4	1	7	0	20	122
sp|P17096|HMGA1_HUMAN High mobility group protein HMG-I/HMG-Y OS=Homo sapiens (Human) OX=9606 GN=HMGA1 PE=1 SV=3	4	11	1	1	0	6	14	11	0	1	3	16	1	0	13	14	8	0	0	3	0	15	107
sp|P98198|AT8B2_HUMAN Phospholipid-transporting ATPase ID OS=Homo sapiens (Human) OX=9606 GN=ATP8B2 PE=1 SV=2	80	59	55	55	22	50	75	70	23	67	128	66	35	75	38	83	76	21	43	88	0	20	1209
sp|P32019|I5P2_HUMAN Type II inositol 1,4,5-trisphosphate 5-phosphatase OS=Homo sapiens (Human) OX=9606 GN=INPP5B PE=1 SV=4	54	54	38	60	22	44	81	67	28	47	105	53	27	46	43	73	45	14	34	58	0	20	993
sp|Q6ZSJ8|CA122_HUMAN Uncharacterized protein C1orf122 OS=Homo sapiens (Human) OX=9606 GN=C1orf122 PE=4 SV=2	15	12	1	6	1	8	9	18	0	1	8	3	2	1	14	4	1	2	0	4	0	18	110
sp|Q15417|CNN3_HUMAN Calponin-3 OS=Homo sapiens (Human) OX=9606 GN=CNN3 PE=1 SV=1	21	9	18	22	3	25	17	33	7	19	22	24	11	8	14	20	23	2	18	13	0	20	329
sp|Q9H1C7|CYTM1_HUMAN Cysteine-rich and transmembrane domain-containing protein 1 OS=Homo sapiens (Human) OX=9606 GN=CYSTM1 PE=1 SV=1	3	2	2	3	6	8	4	12	0	0	5	1	4	0	24	1	7	3	9	3	0	17	97
sp|Q8WVF1|OSCP1_HUMAN Protein OSCP1 OS=Homo sapiens (Human) OX=9606 GN=OSCP1 PE=1 SV=4	18	24	19	19	1	20	35	24	5	20	49	24	16	19	20	21	21	3	10	21	0	20	389
sp|A6NKP2|D42E2_HUMAN Putative short-chain dehydrogenase/reductase family 42E member 2 OS=Homo sapiens (Human) OX=9606 GN=SDR42E2 PE=3 SV=3	42	32	8	14	5	20	22	32	14	14	52	20	8	16	25	23	23	5	14	33	0	20	422
sp|P42677|RS27_HUMAN 40S ribosomal protein S27 OS=Homo sapiens (Human) OX=9606 GN=RPS27 PE=1 SV=3	3	5	1	2	6	4	4	5	4	1	7	10	2	3	6	6	6	0	2	7	0	19	84
sp|E2RYF7|PBMU2_HUMAN Protein PBMUCL2 OS=Homo sapiens (Human) OX=9606 GN=HCG22 PE=2 SV=1	16	12	4	31	1	1	16	24	6	7	11	10	1	2	20	19	47	2	3	18	0	20	251
sp|Q99501|GA2L1_HUMAN GAS2-like protein 1 OS=Homo sapiens (Human) OX=9606 GN=GAS2L1 PE=1 SV=2	67	82	8	32	12	23	38	63	10	8	55	10	11	13	84	73	41	7	6	38	0	20	681
sp|Q8NEY4|VATC2_HUMAN V-type proton ATPase subunit C 2 OS=Homo sapiens (Human) OX=9606 GN=ATP6V1C2 PE=1 SV=2	23	20	17	26	1	16	36	17	7	16	50	36	9	21	16	34	27	5	13	37	0	20	427
sp|Q8TDW0|LRC8C_HUMAN Volume-regulated anion channel subunit LRRC8C OS=Homo sapiens (Human) OX=9606 GN=LRRC8C PE=1 SV=2	29	27	42	39	17	33	51	23	22	49	113	64	21	41	36	71	35	9	27	54	0	20	803
sp|A0A096LP49|CC187_HUMAN Coiled-coil domain-containing protein 187 OS=Homo sapiens (Human) OX=9606 GN=CCDC187 PE=2 SV=1	106	94	9	42	26	69	55	91	26	11	90	47	10	15	119	118	46	29	9	51	0	20	1063
sp|Q9H5Y7|SLIK6_HUMAN SLIT and NTRK-like protein 6 OS=Homo sapiens (Human) OX=9606 GN=SLITRK6 PE=2 SV=3	28	28	57	34	18	35	58	38	32	51	130	48	22	26	54	65	52	5	24	36	0	20	841
sp|P0C0S8|H2A1_HUMAN Histone H2A type 1 OS=Homo sapiens (Human) OX=9606 GN=H2AC13 PE=1 SV=2	17	12	6	2	0	5	7	14	4	6	16	14	1	1	5	4	5	0	3	8	0	18	130
sp|Q99217|AMELX_HUMAN Amelogenin, X isoform OS=Homo sapiens (Human) OX=9606 GN=AMELX PE=1 SV=1	7	2	2	3	1	24	5	8	14	8	16	3	11	4	49	6	8	4	7	9	0	20	191
sp|O94829|IPO13_HUMAN Importin-13 OS=Homo sapiens (Human) OX=9606 GN=IPO13 PE=1 SV=3	78	36	24	47	21	69	63	38	23	47	135	40	23	42	54	69	38	14	26	76	0	20	963
sp|P46734|MP2K3_HUMAN Dual specificity mitogen-activated protein kinase kinase 3 OS=Homo sapiens (Human) OX=9606 GN=MAP2K3 PE=1 SV=2	20	20	12	22	6	11	24	17	7	21	27	26	16	15	22	26	18	3	9	25	0	20	347
sp|Q9Y2S7|PDIP2_HUMAN Polymerase delta-interacting protein 2 OS=Homo sapiens (Human) OX=9606 GN=POLDIP2 PE=1 SV=1	29	33	9	16	4	15	25	23	16	11	29	12	4	16	23	30	23	11	13	26	0	20	368
sp|P51809|VAMP7_HUMAN Vesicle-associated membrane protein 7 OS=Homo sapiens (Human) OX=9606 GN=VAMP7 PE=1 SV=3	16	11	12	9	6	8	12	10	5	20	22	15	6	11	4	14	15	2	7	15	0	20	220
sp|O43524|FOXO3_HUMAN Forkhead box protein O3 OS=Homo sapiens (Human) OX=9606 GN=FOXO3 PE=1 SV=1	50	31	33	43	5	39	28	59	9	14	64	21	26	14	52	110	36	9	8	22	0	20	673
sp|Q9Y394|DHRS7_HUMAN Dehydrogenase/reductase SDR family member 7 OS=Homo sapiens (Human) OX=9606 GN=DHRS7 PE=1 SV=1	16	18	16	14	7	10	20	24	6	21	51	20	10	8	9	24	20	11	8	26	0	20	339
sp|Q9BYG3|MK67I_HUMAN MKI67 FHA domain-interacting nucleolar phosphoprotein OS=Homo sapiens (Human) OX=9606 GN=NIFK PE=1 SV=1	8	24	11	13	3	19	24	11	4	11	22	35	4	16	17	21	23	1	7	19	0	20	293
sp|P01023|A2MG_HUMAN Alpha-2-macroglobulin OS=Homo sapiens (Human) OX=9606 GN=A2M PE=1 SV=3	93	46	64	53	25	73	104	91	40	57	143	89	26	62	78	123	101	11	56	139	0	20	1474
sp|P38484|INGR2_HUMAN Interferon gamma receptor 2 OS=Homo sapiens (Human) OX=9606 GN=IFNGR2 PE=1 SV=2	25	11	11	16	6	18	16	14	6	20	37	13	5	18	25	31	20	9	12	24	0	20	337
sp|Q69YN2|C19L1_HUMAN CWF19-like protein 1 OS=Homo sapiens (Human) OX=9606 GN=CWF19L1 PE=1 SV=2	35	23	19	27	13	30	40	34	12	28	49	43	5	28	32	38	24	5	20	33	0	20	538
sp|Q99697|PITX2_HUMAN Pituitary homeobox 2 OS=Homo sapiens (Human) OX=9606 GN=PITX2 PE=1 SV=2	25	20	24	10	7	19	16	12	3	3	20	20	9	14	25	44	14	4	10	18	0	20	317
sp|O60499|STX10_HUMAN Syntaxin-10 OS=Homo sapiens (Human) OX=9606 GN=STX10 PE=1 SV=1	21	17	6	15	2	18	26	14	4	10	30	10	11	7	6	16	9	4	2	21	0	20	249
sp|A6NI28|RHG42_HUMAN Rho GTPase-activating protein 42 OS=Homo sapiens (Human) OX=9606 GN=ARHGAP42 PE=1 SV=3	51	44	33	38	13	43	72	45	17	50	77	70	21	36	47	96	44	7	29	41	0	20	874
sp|Q5T2Q4|CCYL2_HUMAN Cyclin-Y-like protein 2 OS=Homo sapiens (Human) OX=9606 GN=CCNYL2 PE=3 SV=2	28	18	13	19	11	13	27	13	14	23	39	22	8	17	14	26	17	4	14	21	0	20	361
sp|Q5VUJ6|LRCH2_HUMAN Leucine-rich repeat and calponin homology domain-containing protein 2 OS=Homo sapiens (Human) OX=9606 GN=LRCH2 PE=2 SV=2	31	43	41	47	15	39	56	61	20	34	82	50	14	19	50	73	30	5	12	43	0	20	765
sp|Q6ZSG1|RN165_HUMAN E3 ubiquitin-protein ligase RNF165 OS=Homo sapiens (Human) OX=9606 GN=RNF165 PE=1 SV=1	19	25	6	16	7	35	16	18	26	6	39	9	7	14	32	24	15	2	9	21	0	20	346
sp|Q9HB90|RRAGC_HUMAN Ras-related GTP-binding protein C OS=Homo sapiens (Human) OX=9606 GN=RRAGC PE=1 SV=1	28	12	15	30	7	11	27	31	12	29	33	24	10	24	12	35	18	1	16	24	0	20	399
sp|Q5GAN6|RNS10_HUMAN Inactive ribonuclease-like protein 10 OS=Homo sapiens (Human) OX=9606 GN=RNASE10 PE=2 SV=1	11	5	11	14	8	13	16	14	5	9	27	14	10	6	10	14	13	2	3	11	0	20	216
sp|O75096|LRP4_HUMAN Low-density lipoprotein receptor-related protein 4 OS=Homo sapiens (Human) OX=9606 GN=LRP4 PE=1 SV=4	112	127	95	172	94	61	100	154	54	94	160	62	33	39	87	146	117	52	48	98	0	20	1905
sp|Q01844|EWS_HUMAN RNA-binding protein EWS OS=Homo sapiens (Human) OX=9606 GN=EWSR1 PE=1 SV=1	38	45	17	32	5	59	15	131	4	3	14	18	21	15	76	58	45	3	42	15	0	20	656
tr|A0A494C0T7|A0A494C0T7_HUMAN Uncharacterized protein OS=Homo sapiens (Human) OX=9606 GN=LOC149373 PE=4 SV=1	9	9	4	4	3	11	6	13	4	2	11	4	2	7	10	12	5	1	1	5	0	20	123
sp|Q0P5P2|CQ067_HUMAN Uncharacterized protein C17orf67 OS=Homo sapiens (Human) OX=9606 GN=C17orf67 PE=1 SV=3	3	8	2	3	2	4	8	1	7	2	14	5	3	3	9	5	5	1	1	4	0	20	90
sp|O75310|UDB11_HUMAN UDP-glucuronosyltransferase 2B11 OS=Homo sapiens (Human) OX=9606 GN=UGT2B11 PE=2 SV=1	32	21	21	27	8	17	23	27	15	34	51	40	20	41	25	34	25	15	16	37	0	20	529
sp|Q13630|FCL_HUMAN GDP-L-fucose synthase OS=Homo sapiens (Human) OX=9606 GN=TSTA3 PE=1 SV=1	24	13	16	19	4	12	18	24	11	16	21	19	7	20	14	18	22	5	10	28	0	20	321
sp|Q96P53|WDFY2_HUMAN WD repeat and FYVE domain-containing protein 2 OS=Homo sapiens (Human) OX=9606 GN=WDFY2 PE=1 SV=2	17	23	10	23	14	22	24	30	16	20	27	20	12	15	15	35	25	12	6	34	0	20	400
sp|Q8NDH6|ICA1L_HUMAN Islet cell autoantigen 1-like protein OS=Homo sapiens (Human) OX=9606 GN=ICA1L PE=1 SV=1	33	19	23	31	8	34	41	20	11	10	51	35	16	26	18	51	24	5	5	21	0	20	482
sp|Q6ZQV5|ZN788_HUMAN Putative KRAB domain-containing protein ZNF788 OS=Homo sapiens (Human) OX=9606 GN=ZNF788P PE=5 SV=3	5	4	8	6	0	6	8	1	0	3	7	5	4	3	5	5	2	2	1	7	0	18	82
sp|P10620|MGST1_HUMAN Microsomal glutathione S-transferase 1 OS=Homo sapiens (Human) OX=9606 GN=MGST1 PE=1 SV=1	14	11	5	8	1	2	5	8	3	8	21	7	7	10	7	9	10	0	9	10	0	19	155
sp|Q5T6F2|UBAP2_HUMAN Ubiquitin-associated protein 2 OS=Homo sapiens (Human) OX=9606 GN=UBAP2 PE=1 SV=1	92	30	52	38	10	81	41	94	31	24	81	46	16	29	98	184	88	7	27	50	0	20	1119
sp|Q6UXR4|SPA13_HUMAN Putative serpin A13 OS=Homo sapiens (Human) OX=9606 GN=SERPINA13P PE=5 SV=1	24	19	7	15	4	13	23	17	12	11	43	12	11	17	16	22	16	8	2	15	0	20	307
sp|Q96EX1|SIM12_HUMAN Small integral membrane protein 12 OS=Homo sapiens (Human) OX=9606 GN=SMIM12 PE=1 SV=3	5	7	3	5	0	2	9	4	2	2	7	8	1	5	7	3	4	3	3	12	0	19	92
sp|A1L162|ERIC2_HUMAN Glutamate-rich protein 2 OS=Homo sapiens (Human) OX=9606 GN=ERICH2 PE=1 SV=1	8	2	9	20	2	7	32	7	1	5	12	11	6	3	5	13	6	0	3	4	0	19	156
sp|P18825|ADA2C_HUMAN Alpha-2C adrenergic receptor OS=Homo sapiens (Human) OX=9606 GN=ADRA2C PE=1 SV=2	66	46	12	10	12	11	15	47	3	16	40	8	5	27	26	39	15	8	15	41	0	20	462
sp|Q9BRJ9|MESP1_HUMAN Mesoderm posterior protein 1 OS=Homo sapiens (Human) OX=9606 GN=MESP1 PE=2 SV=1	31	29	0	10	8	12	16	24	2	3	30	4	6	2	38	29	9	6	1	8	0	19	268
sp|P59103|DAOA_HUMAN D-amino acid oxidase activator OS=Homo sapiens (Human) OX=9606 GN=DAOA PE=1 SV=2	8	13	6	4	3	9	17	7	4	5	15	11	5	5	4	14	7	3	8	5	0	20	153
sp|Q8NI22|MCFD2_HUMAN Multiple coagulation factor deficiency protein 2 OS=Homo sapiens (Human) OX=9606 GN=MCFD2 PE=1 SV=1	11	4	7	12	2	6	15	10	7	7	17	6	7	5	7	9	5	1	4	4	0	20	146
sp|Q6UXI9|NPNT_HUMAN Nephronectin OS=Homo sapiens (Human) OX=9606 GN=NPNT PE=2 SV=3	27	35	18	31	38	23	19	62	17	28	39	32	8	13	53	31	35	11	18	27	0	20	565
sp|Q30201|HFE_HUMAN Hereditary hemochromatosis protein OS=Homo sapiens (Human) OX=9606 GN=HFE PE=1 SV=1	17	23	7	18	5	23	23	24	13	16	43	12	10	11	20	20	17	11	12	23	0	20	348
sp|Q8N0V4|LGI2_HUMAN Leucine-rich repeat LGI family member 2 OS=Homo sapiens (Human) OX=9606 GN=LGI2 PE=2 SV=1	27	26	22	39	12	22	24	25	12	38	56	34	10	38	17	55	26	10	17	35	0	20	545
sp|Q9BYT5|KRA22_HUMAN Keratin-associated protein 2-2 OS=Homo sapiens (Human) OX=9606 GN=KRTAP2-2 PE=2 SV=3	2	10	0	2	33	6	2	7	0	2	2	0	1	1	16	13	15	1	1	9	0	17	123
sp|P06737|PYGL_HUMAN Glycogen phosphorylase, liver form OS=Homo sapiens (Human) OX=9606 GN=PYGL PE=1 SV=4	59	44	50	53	7	29	59	48	19	55	84	65	23	40	32	35	40	12	35	58	0	20	847
sp|Q8TBZ3|WDR20_HUMAN WD repeat-containing protein 20 OS=Homo sapiens (Human) OX=9606 GN=WDR20 PE=1 SV=2	26	29	27	31	15	15	29	44	21	17	49	35	9	28	32	58	40	7	13	44	0	20	569
sp|P49903|SPS1_HUMAN Selenide, water dikinase 1 OS=Homo sapiens (Human) OX=9606 GN=SEPHS1 PE=1 SV=2	33	16	19	18	9	20	24	32	9	23	36	18	18	12	21	14	27	4	7	32	0	20	392
sp|P50395|GDIB_HUMAN Rab GDP dissociation inhibitor beta OS=Homo sapiens (Human) OX=9606 GN=GDI2 PE=1 SV=2	19	22	17	28	8	13	34	31	5	37	36	37	12	18	21	26	25	1	26	29	0	20	445
sp|Q8IWT0|ARCH_HUMAN Protein archease OS=Homo sapiens (Human) OX=9606 GN=ZBTB8OS PE=1 SV=2	11	5	5	12	1	10	21	7	4	8	13	9	5	10	6	7	10	3	8	12	0	20	167
sp|Q9NQ34|TMM9B_HUMAN Transmembrane protein 9B OS=Homo sapiens (Human) OX=9606 GN=TMEM9B PE=1 SV=1	12	13	7	11	9	10	10	8	6	11	30	11	3	4	7	15	4	2	8	17	0	20	198
sp|O00468|AGRIN_HUMAN Agrin OS=Homo sapiens (Human) OX=9606 GN=AGRN PE=1 SV=6	195	149	44	99	143	85	120	230	41	27	178	46	13	57	184	149	119	14	29	146	0	20	2068
sp|Q5SNV9|CA167_HUMAN Uncharacterized protein C1orf167 OS=Homo sapiens (Human) OX=9606 GN=C1orf167 PE=2 SV=2	183	152	12	34	40	142	72	129	41	15	150	47	13	28	106	102	60	63	7	72	0	20	1468
sp|Q8NG48|LINES_HUMAN Protein Lines homolog 1 OS=Homo sapiens (Human) OX=9606 GN=LINS1 PE=1 SV=2	47	23	28	41	30	36	46	19	24	45	95	52	17	41	27	71	41	8	19	47	0	20	757
sp|A0PJZ3|GXLT2_HUMAN Glucoside xylosyltransferase 2 OS=Homo sapiens (Human) OX=9606 GN=GXYLT2 PE=2 SV=2	38	37	14	17	7	19	21	22	15	19	53	24	11	23	40	20	14	9	17	23	0	20	443
sp|Q00013|EM55_HUMAN 55 kDa erythrocyte membrane protein OS=Homo sapiens (Human) OX=9606 GN=MPP1 PE=1 SV=2	29	18	18	20	4	31	36	28	13	27	38	37	12	17	26	40	25	5	13	29	0	20	466
sp|P48637|GSHB_HUMAN Glutathione synthetase OS=Homo sapiens (Human) OX=9606 GN=GSS PE=1 SV=1	50	29	17	21	3	30	38	31	8	22	59	22	9	17	21	32	17	3	12	33	0	20	474
sp|Q96KV7|WDR90_HUMAN WD repeat-containing protein 90 OS=Homo sapiens (Human) OX=9606 GN=WDR90 PE=1 SV=2	169	107	18	87	59	66	68	147	56	36	189	36	26	71	118	174	101	36	24	160	0	20	1748
sp|Q8IZJ1|UNC5B_HUMAN Netrin receptor UNC5B OS=Homo sapiens (Human) OX=9606 GN=UNC5B PE=1 SV=2	75	48	30	49	35	41	52	67	21	30	113	35	12	26	62	75	67	19	28	60	0	20	945
sp|O75061|AUXI_HUMAN Putative tyrosine-protein phosphatase auxilin OS=Homo sapiens (Human) OX=9606 GN=DNAJC6 PE=1 SV=3	55	34	35	54	13	49	40	75	26	31	72	57	21	40	83	91	54	12	25	46	0	20	913
sp|Q53GG5|PDLI3_HUMAN PDZ and LIM domain protein 3 OS=Homo sapiens (Human) OX=9606 GN=PDLIM3 PE=1 SV=1	27	19	12	22	11	15	18	34	11	18	24	18	9	11	33	27	22	2	8	23	0	20	364
sp|Q14929|ZN169_HUMAN Zinc finger protein 169 OS=Homo sapiens (Human) OX=9606 GN=ZNF169 PE=1 SV=3	19	56	5	14	30	40	46	56	38	15	57	35	5	29	32	57	32	3	13	21	0	20	603
sp|O43543|XRCC2_HUMAN DNA repair protein XRCC2 OS=Homo sapiens (Human) OX=9606 GN=XRCC2 PE=1 SV=1	10	15	6	14	12	10	23	13	11	13	39	13	6	16	7	36	12	2	9	13	0	20	280
sp|Q6ZMU1|C3P1_HUMAN Putative protein C3P1 OS=Homo sapiens (Human) OX=9606 GN=C3P1 PE=5 SV=3	24	14	11	14	7	25	18	20	6	16	34	16	13	16	19	43	22	6	10	29	0	20	363
sp|Q8NHW6|OTOSP_HUMAN Otospiralin OS=Homo sapiens (Human) OX=9606 GN=OTOS PE=2 SV=1	10	1	1	4	2	6	5	7	3	1	10	1	4	7	10	3	3	2	5	4	0	20	89
sp|P02795|MT2_HUMAN Metallothionein-2 OS=Homo sapiens (Human) OX=9606 GN=MT2A PE=1 SV=1	7	0	1	3	20	1	1	5	0	1	0	8	1	0	2	8	2	0	0	1	0	14	61
sp|Q15393|SF3B3_HUMAN Splicing factor 3B subunit 3 OS=Homo sapiens (Human) OX=9606 GN=SF3B3 PE=1 SV=4	79	64	56	67	19	48	93	87	26	67	122	52	26	57	61	74	71	8	38	102	0	20	1217
sp|P56589|PEX3_HUMAN Peroxisomal biogenesis factor 3 OS=Homo sapiens (Human) OX=9606 GN=PEX3 PE=1 SV=1	18	17	19	14	7	24	23	17	9	23	52	23	11	11	14	32	22	3	10	24	0	20	373
sp|Q5SXM1|ZN678_HUMAN Zinc finger protein 678 OS=Homo sapiens (Human) OX=9606 GN=ZNF678 PE=2 SV=1	10	28	19	9	42	20	45	35	34	24	26	74	2	24	16	37	40	7	22	11	0	20	525
sp|Q9BSA4|TTYH2_HUMAN Protein tweety homolog 2 OS=Homo sapiens (Human) OX=9606 GN=TTYH2 PE=1 SV=3	53	22	14	28	19	31	16	33	14	19	73	9	13	22	23	47	31	9	24	34	0	20	534
sp|O60678|ANM3_HUMAN Protein arginine N-methyltransferase 3 OS=Homo sapiens (Human) OX=9606 GN=PRMT3 PE=1 SV=4	32	14	18	38	12	15	42	28	17	30	47	42	14	25	19	41	31	5	21	40	0	20	531
sp|Q9P2M7|CING_HUMAN Cingulin OS=Homo sapiens (Human) OX=9606 GN=CGN PE=1 SV=2	91	120	29	61	4	118	168	66	13	18	147	82	17	13	32	93	50	6	8	61	0	20	1197
sp|Q86Y28|BAGE4_HUMAN B melanoma antigen 4 OS=Homo sapiens (Human) OX=9606 GN=BAGE4 PE=2 SV=1	7	1	0	1	0	2	4	2	0	0	7	1	2	1	2	3	1	2	0	3	0	15	39
sp|Q5JSZ5|PRC2B_HUMAN Protein PRRC2B OS=Homo sapiens (Human) OX=9606 GN=PRRC2B PE=1 SV=2	161	164	57	101	20	147	185	200	39	44	143	134	42	59	229	273	73	26	37	95	0	20	2229
sp|Q86UA1|PRP39_HUMAN Pre-mRNA-processing factor 39 OS=Homo sapiens (Human) OX=9606 GN=PRPF39 PE=1 SV=3	36	35	48	34	6	28	75	28	26	34	57	40	16	28	30	37	33	12	32	34	0	20	669
sp|Q32M84|BTBDG_HUMAN BTB/POZ domain-containing protein 16 OS=Homo sapiens (Human) OX=9606 GN=BTBD16 PE=2 SV=2	27	24	19	18	10	25	32	22	18	29	69	43	10	34	19	32	32	6	14	23	0	20	506
sp|P0CE72|ONCO_HUMAN Oncomodulin-1 OS=Homo sapiens (Human) OX=9606 GN=OCM PE=1 SV=1	10	3	3	12	1	7	12	6	1	4	8	7	4	9	2	10	5	0	1	4	0	19	109
sp|A0A0J9YX94|PMA6F_HUMAN Paraneoplastic antigen Ma6F OS=Homo sapiens (Human) OX=9606 GN=PNMA6F PE=4 SV=1	92	40	6	30	6	29	71	83	4	11	50	14	11	13	35	30	13	10	2	28	0	20	578
sp|Q12767|TMM94_HUMAN Transmembrane protein 94 OS=Homo sapiens (Human) OX=9606 GN=TMEM94 PE=1 SV=1	70	68	40	64	45	61	77	77	47	59	197	47	29	55	86	141	65	25	22	81	0	20	1356
sp|Q9Y572|RIPK3_HUMAN Receptor-interacting serine/threonine-protein kinase 3 OS=Homo sapiens (Human) OX=9606 GN=RIPK3 PE=1 SV=2	27	27	28	17	9	30	38	45	7	8	50	24	14	15	48	47	27	12	8	37	0	20	518
sp|P19419|ELK1_HUMAN ETS domain-containing protein Elk-1 OS=Homo sapiens (Human) OX=9606 GN=ELK1 PE=1 SV=2	37	19	9	10	3	17	29	40	7	12	42	18	6	9	62	45	23	4	8	28	0	20	428
sp|Q8NHU2|CFA61_HUMAN Cilia- and flagella-associated protein 61 OS=Homo sapiens (Human) OX=9606 GN=CFAP61 PE=2 SV=3	75	59	61	63	32	42	88	49	49	80	127	56	25	64	64	85	70	8	57	83	0	20	1237
sp|Q9P0M6|H2AW_HUMAN Core histone macro-H2A.2 OS=Homo sapiens (Human) OX=9606 GN=H2AFY2 PE=1 SV=3	37	17	8	15	4	10	26	31	7	21	34	46	6	11	18	39	16	1	6	19	0	20	372
sp|A1A4G5|LNP1_HUMAN Leukemia NUP98 fusion partner 1 OS=Homo sapiens (Human) OX=9606 GN=LNP1 PE=2 SV=1	5	24	1	11	5	4	25	7	11	3	10	15	4	8	10	23	3	3	2	4	0	20	178
sp|Q9H8G1|ZN430_HUMAN Zinc finger protein 430 OS=Homo sapiens (Human) OX=9606 GN=ZNF430 PE=1 SV=3	20	24	25	15	33	24	51	34	32	28	37	66	6	27	20	37	42	6	28	15	0	20	570
sp|P50607|TUB_HUMAN Tubby protein homolog OS=Homo sapiens (Human) OX=9606 GN=TUB PE=1 SV=1	45	36	20	30	4	32	34	36	8	16	36	34	12	12	26	52	29	3	13	28	0	20	506
sp|Q9UL42|PNMA2_HUMAN Paraneoplastic antigen Ma2 OS=Homo sapiens (Human) OX=9606 GN=PNMA2 PE=1 SV=2	29	26	8	13	4	19	52	20	4	14	44	18	10	12	19	20	13	7	6	26	0	20	364
sp|P40261|NNMT_HUMAN Nicotinamide N-methyltransferase OS=Homo sapiens (Human) OX=9606 GN=NNMT PE=1 SV=1	16	9	7	14	8	10	20	16	3	10	35	21	4	11	14	24	10	3	12	17	0	20	264
sp|A6NES4|MRO2A_HUMAN Maestro heat-like repeat-containing protein family member 2A OS=Homo sapiens (Human) OX=9606 GN=MROH2A PE=4 SV=4	119	79	46	70	36	82	126	62	49	89	235	97	68	54	61	128	93	22	39	119	0	20	1674
sp|Q5ST30|SYVM_HUMAN Valine--tRNA ligase, mitochondrial OS=Homo sapiens (Human) OX=9606 GN=VARS2 PE=1 SV=2	94	74	15	42	20	56	75	75	37	27	134	35	19	35	89	75	39	31	18	73	0	20	1063
sp|Q2T9K0|TMM44_HUMAN Transmembrane protein 44 OS=Homo sapiens (Human) OX=9606 GN=TMEM44 PE=1 SV=3	54	34	8	21	16	24	23	25	10	20	61	13	8	13	29	49	24	13	8	22	0	20	475
sp|Q8NA75|DC4L2_HUMAN DDB1- and CUL4-associated factor 4-like protein 2 OS=Homo sapiens (Human) OX=9606 GN=DCAF4L2 PE=1 SV=1	26	24	17	16	13	19	13	30	12	17	45	13	10	17	18	39	22	7	11	26	0	20	395
sp|Q86UC2|RSPH3_HUMAN Radial spoke head protein 3 homolog OS=Homo sapiens (Human) OX=9606 GN=RSPH3 PE=1 SV=1	44	55	11	27	10	28	65	32	11	15	59	23	16	12	44	35	31	4	17	21	0	20	560
sp|C9JCN9|HSBPL_HUMAN Heat shock factor-binding protein 1-like protein 1 OS=Homo sapiens (Human) OX=9606 GN=HSBP1L1 PE=3 SV=2	7	5	5	4	0	6	9	5	1	3	9	4	5	2	2	1	3	0	0	3	0	17	74
sp|Q7Z6W1|TMCO2_HUMAN Transmembrane and coiled-coil domain-containing protein 2 OS=Homo sapiens (Human) OX=9606 GN=TMCO2 PE=2 SV=1	9	4	9	5	4	10	8	10	1	16	29	13	2	6	7	26	10	4	4	5	0	20	182
sp|Q7Z570|Z804A_HUMAN Zinc finger protein 804A OS=Homo sapiens (Human) OX=9606 GN=ZNF804A PE=2 SV=3	69	48	84	50	32	67	96	34	46	44	107	105	19	41	78	116	78	5	33	57	0	20	1209
sp|Q03721|KCNC4_HUMAN Potassium voltage-gated channel subfamily C member 4 OS=Homo sapiens (Human) OX=9606 GN=KCNC4 PE=1 SV=2	50	47	16	32	18	8	42	62	14	29	61	24	13	32	38	42	41	9	17	40	0	20	635
sp|O75886|STAM2_HUMAN Signal transducing adapter molecule 2 OS=Homo sapiens (Human) OX=9606 GN=STAM2 PE=1 SV=1	38	9	32	32	7	34	39	22	15	25	43	35	14	12	33	44	33	4	16	38	0	20	525
sp|Q08477|CP4F3_HUMAN Cytochrome P450 4F3 OS=Homo sapiens (Human) OX=9606 GN=CYP4F3 PE=1 SV=2	35	33	8	30	15	18	29	24	18	27	71	27	12	29	37	32	20	15	13	27	0	20	520
sp|Q13185|CBX3_HUMAN Chromobox protein homolog 3 OS=Homo sapiens (Human) OX=9606 GN=CBX3 PE=1 SV=4	14	8	7	16	3	5	22	10	1	5	13	25	5	7	7	13	7	4	2	9	0	20	183
sp|P80748|LV321_HUMAN Immunoglobulin lambda variable 3-21 OS=Homo sapiens (Human) OX=9606 GN=IGLV3-21 PE=1 SV=2	7	4	4	7	3	6	3	11	3	4	8	2	1	1	8	16	10	3	5	11	0	20	117
sp|Q4V339|CBWD6_HUMAN COBW domain-containing protein 6 OS=Homo sapiens (Human) OX=9606 GN=CBWD6 PE=3 SV=1	18	13	17	28	7	18	39	27	9	28	50	28	5	7	12	22	28	5	5	29	0	20	395
sp|P0C7W9|F90AE_HUMAN Putative protein FAM90A14P OS=Homo sapiens (Human) OX=9606 GN=FAM90A14P PE=5 SV=1	48	38	9	17	10	26	26	31	13	3	40	29	9	8	65	46	19	4	2	21	0	20	464
sp|A0A0K0K1C4|TVB27_HUMAN T cell receptor beta variable 27 OS=Homo sapiens (Human) OX=9606 GN=TRBV27 PE=3 SV=3	3	5	6	3	3	7	6	9	1	3	14	6	4	2	8	9	7	1	8	9	0	20	114
sp|Q86XD8|ZFAN4_HUMAN AN1-type zinc finger protein 4 OS=Homo sapiens (Human) OX=9606 GN=ZFAND4 PE=2 SV=2	36	38	49	28	20	25	49	49	24	25	74	49	15	26	43	79	42	3	15	38	0	20	727
sp|Q5VVM6|CCD30_HUMAN Coiled-coil domain-containing protein 30 OS=Homo sapiens (Human) OX=9606 GN=CCDC30 PE=2 SV=1	27	32	41	25	11	81	119	21	25	40	92	85	9	11	17	70	30	5	13	29	0	20	783
sp|Q9UKA2|FBXL4_HUMAN F-box/LRR-repeat protein 4 OS=Homo sapiens (Human) OX=9606 GN=FBXL4 PE=1 SV=2	36	28	33	29	28	29	34	23	12	26	86	29	13	26	32	55	37	10	19	36	0	20	621
sp|C9JN71|ZN878_HUMAN Zinc finger protein 878 OS=Homo sapiens (Human) OX=9606 GN=ZNF878 PE=3 SV=2	22	39	13	8	30	23	46	34	36	17	24	62	5	26	21	50	31	2	23	19	0	20	531
sp|Q86Y39|NDUAB_HUMAN NADH dehydrogenase [ubiquinone] 1 alpha subcomplex subunit 11 OS=Homo sapiens (Human) OX=9606 GN=NDUFA11 PE=1 SV=3	21	6	3	5	4	2	4	17	3	5	10	7	2	7	7	5	12	2	7	12	0	20	141
sp|Q8NGR8|OR1L8_HUMAN Olfactory receptor 1L8 OS=Homo sapiens (Human) OX=9606 GN=OR1L8 PE=2 SV=1	12	11	10	9	12	6	6	8	12	20	47	13	10	24	12	32	25	0	14	26	0	19	309
sp|Q6P2E9|EDC4_HUMAN Enhancer of mRNA-decapping protein 4 OS=Homo sapiens (Human) OX=9606 GN=EDC4 PE=1 SV=1	132	71	27	70	25	98	92	82	40	49	166	53	25	33	95	162	72	14	15	80	0	20	1401
sp|Q8NE35|CPEB3_HUMAN Cytoplasmic polyadenylation element-binding protein 3 OS=Homo sapiens (Human) OX=9606 GN=CPEB3 PE=1 SV=2	66	34	27	37	11	50	27	47	19	21	42	26	17	32	87	68	25	10	16	36	0	20	698
sp|Q9ULC8|ZDHC8_HUMAN Probable palmitoyltransferase ZDHHC8 OS=Homo sapiens (Human) OX=9606 GN=ZDHHC8 PE=1 SV=3	62	55	19	36	15	17	23	70	22	15	76	23	9	32	98	82	36	3	20	52	0	20	765
sp|Q9NT68|TEN2_HUMAN Teneurin-2 OS=Homo sapiens (Human) OX=9606 GN=TENM2 PE=1 SV=3	142	155	148	169	78	108	129	229	75	141	246	113	56	85	137	258	177	35	123	170	0	20	2774
sp|O75462|CRLF1_HUMAN Cytokine receptor-like factor 1 OS=Homo sapiens (Human) OX=9606 GN=CRLF1 PE=1 SV=1	32	33	14	20	12	13	16	39	12	11	47	17	3	8	36	35	23	12	13	26	0	20	422
sp|Q8NCW0|KREM2_HUMAN Kremen protein 2 OS=Homo sapiens (Human) OX=9606 GN=KREMEN2 PE=2 SV=1	52	36	7	23	19	22	15	57	8	6	54	3	3	17	44	40	16	8	14	18	0	20	462
sp|Q6NT52|CGB2_HUMAN Choriogonadotropin subunit beta variant 2 OS=Homo sapiens (Human) OX=9606 GN=CGB2 PE=2 SV=5	10	12	4	6	12	5	4	11	1	5	19	5	3	2	22	15	11	1	3	12	0	20	163
sp|Q96A09|TET5B_HUMAN Terminal nucleotidyltransferase 5B OS=Homo sapiens (Human) OX=9606 GN=TENT5B PE=1 SV=2	45	34	7	19	8	17	23	27	15	12	53	11	5	17	27	32	24	4	10	35	0	20	425
sp|Q6UW10|SFTA2_HUMAN Surfactant-associated protein 2 OS=Homo sapiens (Human) OX=9606 GN=SFTA2 PE=1 SV=1	1	1	2	0	2	2	4	7	6	0	20	3	2	2	3	11	7	0	1	4	0	17	78
sp|K7EJ46|SIM22_HUMAN Small integral membrane protein 22 OS=Homo sapiens (Human) OX=9606 GN=SMIM22 PE=1 SV=2	5	5	1	2	4	3	7	4	2	1	12	3	2	5	5	6	6	1	0	9	0	19	83
sp|P0CAP1|MYZAP_HUMAN Myocardial zonula adherens protein OS=Homo sapiens (Human) OX=9606 GN=MYZAP PE=1 SV=1	23	35	17	18	4	43	61	15	7	17	56	38	17	3	11	33	28	1	13	26	0	20	466
sp|Q9UNP4|SIAT9_HUMAN Lactosylceramide alpha-2,3-sialyltransferase OS=Homo sapiens (Human) OX=9606 GN=ST3GAL5 PE=1 SV=4	28	24	11	20	9	18	25	19	12	15	47	33	11	22	25	23	23	6	16	31	0	20	418
sp|Q8IUQ4|SIAH1_HUMAN E3 ubiquitin-protein ligase SIAH1 OS=Homo sapiens (Human) OX=9606 GN=SIAH1 PE=1 SV=2	21	12	12	10	18	14	15	17	10	14	27	10	9	13	18	20	20	3	5	14	0	20	282
sp|Q8NCW6|GLT11_HUMAN Polypeptide N-acetylgalactosaminyltransferase 11 OS=Homo sapiens (Human) OX=9606 GN=GALNT11 PE=1 SV=2	29	39	22	35	15	25	33	49	20	29	59	35	14	27	35	45	21	11	23	42	0	20	608
sp|Q6IE36|OVOS2_HUMAN Ovostatin homolog 2 OS=Homo sapiens (Human) OX=9606 GN=OVOS2 PE=2 SV=2	74	42	95	60	24	83	94	84	19	74	125	76	23	93	56	123	89	18	58	122	0	20	1432
sp|A0A0C4DH26|KVD41_HUMAN Probable non-functional immunoglobulin kappa variable 6D-41 OS=Homo sapiens (Human) OX=9606 GN=IGKV6D-41 PE=5 SV=1	8	3	2	4	2	9	4	9	1	5	11	5	2	5	8	14	8	2	6	7	0	20	115
sp|Q9H213|MAGH1_HUMAN Melanoma-associated antigen H1 OS=Homo sapiens (Human) OX=9606 GN=MAGEH1 PE=1 SV=1	21	19	9	10	2	6	19	12	3	8	11	14	6	7	17	24	8	4	5	14	0	20	219
sp|P42025|ACTY_HUMAN Beta-centractin OS=Homo sapiens (Human) OX=9606 GN=ACTR1B PE=1 SV=1	27	23	9	23	2	10	29	28	10	22	34	23	10	19	19	24	18	4	13	29	0	20	376
sp|Q64ET8|FRG2_HUMAN Protein FRG2 OS=Homo sapiens (Human) OX=9606 GN=FRG2 PE=2 SV=1	21	15	9	10	10	18	24	16	11	7	18	20	4	6	16	38	19	2	4	10	0	20	278
sp|Q9BRT8|CBWD1_HUMAN COBW domain-containing protein 1 OS=Homo sapiens (Human) OX=9606 GN=CBWD1 PE=2 SV=1	20	14	16	26	6	19	40	27	8	27	50	27	5	8	12	22	28	5	7	28	0	20	395
sp|Q9HB21|PKHA1_HUMAN Pleckstrin homology domain-containing family A member 1 OS=Homo sapiens (Human) OX=9606 GN=PLEKHA1 PE=1 SV=2	23	24	21	23	7	21	27	20	7	18	24	32	9	16	26	39	20	4	12	31	0	20	404
sp|A0A0A0MT89|KJ01_HUMAN Immunoglobulin kappa joining 1 OS=Homo sapiens (Human) OX=9606 GN=IGKJ1 PE=4 SV=2	0	0	0	0	0	1	1	2	0	1	0	2	0	1	0	0	2	1	0	1	0	9	12
sp|Q6UXB1|IGFL3_HUMAN Insulin growth factor-like family member 3 OS=Homo sapiens (Human) OX=9606 GN=IGFL3 PE=1 SV=1	3	10	3	3	15	6	4	7	2	5	14	6	2	5	10	10	8	3	3	6	0	20	125
sp|Q9UN67|PCDBA_HUMAN Protocadherin beta-10 OS=Homo sapiens (Human) OX=9606 GN=PCDHB10 PE=1 SV=1	65	44	44	47	9	30	56	56	11	31	96	22	6	39	45	62	43	4	23	67	0	20	800
sp|O15427|MOT4_HUMAN Monocarboxylate transporter 4 OS=Homo sapiens (Human) OX=9606 GN=SLC16A3 PE=1 SV=1	45	18	8	14	11	8	17	54	5	20	60	16	13	35	28	30	16	4	14	49	0	20	465
sp|P08238|HS90B_HUMAN Heat shock protein HSP 90-beta OS=Homo sapiens (Human) OX=9606 GN=HSP90AB1 PE=1 SV=4	38	32	28	51	6	21	96	34	13	48	62	75	19	26	23	48	34	4	24	42	0	20	724
sp|O43866|CD5L_HUMAN CD5 antigen-like OS=Homo sapiens (Human) OX=9606 GN=CD5L PE=1 SV=1	17	20	8	22	27	19	27	39	10	8	27	16	2	7	15	25	13	11	5	29	0	20	347
sp|Q9H0U6|RM18_HUMAN 39S ribosomal protein L18, mitochondrial OS=Homo sapiens (Human) OX=9606 GN=MRPL18 PE=1 SV=1	17	20	8	2	4	6	17	8	5	5	13	6	4	7	10	14	8	5	3	18	0	20	180
sp|O95136|S1PR2_HUMAN Sphingosine 1-phosphate receptor 2 OS=Homo sapiens (Human) OX=9606 GN=S1PR2 PE=1 SV=2	31	19	11	5	11	7	12	20	11	21	56	9	6	13	15	31	20	6	14	35	0	20	353
sp|Q9NRX3|NUA4L_HUMAN NADH dehydrogenase [ubiquinone] 1 alpha subcomplex subunit 4-like 2 OS=Homo sapiens (Human) OX=9606 GN=NDUFA4L2 PE=3 SV=1	7	8	4	6	2	2	1	6	1	5	11	7	3	3	7	5	1	2	4	2	0	20	87
sp|O60268|K0513_HUMAN Uncharacterized protein KIAA0513 OS=Homo sapiens (Human) OX=9606 GN=KIAA0513 PE=1 SV=1	26	22	18	25	8	17	48	27	9	10	31	29	9	21	21	36	24	6	11	13	0	20	411
sp|P13533|MYH6_HUMAN Myosin-6 OS=Homo sapiens (Human) OX=9606 GN=MYH6 PE=1 SV=5	165	111	94	103	14	128	258	73	34	88	209	205	52	58	28	96	83	10	41	89	0	20	1939
sp|Q9H6R4|NOL6_HUMAN Nucleolar protein 6 OS=Homo sapiens (Human) OX=9606 GN=NOL6 PE=1 SV=2	89	85	20	54	15	64	69	73	33	26	167	38	19	45	90	73	59	15	21	91	0	20	1146
tr|A0A075B6Z9|A0A075B6Z9_HUMAN T cell receptor alpha joining 24 OS=Homo sapiens (Human) OX=9606 GN=TRAJ24 PE=4 SV=2	1	0	0	1	0	2	0	3	0	0	0	1	0	2	1	1	4	1	0	3	1	11	21
sp|Q9P0R6|GSKIP_HUMAN GSK3B-interacting protein OS=Homo sapiens (Human) OX=9606 GN=GSKIP PE=1 SV=2	11	7	8	11	3	4	15	8	2	1	16	5	6	6	3	9	7	0	6	11	0	19	139
sp|Q9BS18|APC13_HUMAN Anaphase-promoting complex subunit 13 OS=Homo sapiens (Human) OX=9606 GN=ANAPC13 PE=1 SV=1	3	3	4	9	0	4	10	4	1	4	8	3	2	0	6	2	3	2	2	4	0	18	74
sp|Q6UW01|CBLN3_HUMAN Cerebellin-3 OS=Homo sapiens (Human) OX=9606 GN=CBLN3 PE=1 SV=1	21	12	6	6	2	4	10	28	6	3	25	3	2	10	17	15	6	4	4	21	0	20	205
sp|A0PJY2|FEZF1_HUMAN Fez family zinc finger protein 1 OS=Homo sapiens (Human) OX=9606 GN=FEZF1 PE=1 SV=1	41	19	21	11	20	20	15	30	29	10	41	39	11	23	52	33	26	0	11	23	0	19	475
sp|Q9UBS5|GABR1_HUMAN Gamma-aminobutyric acid type B receptor subunit 1 OS=Homo sapiens (Human) OX=9606 GN=GABBR1 PE=1 SV=1	58	57	35	41	19	36	61	67	20	55	100	53	18	41	52	74	58	22	32	62	0	20	961
tr|A0A075B6Z5|A0A075B6Z5_HUMAN T cell receptor alpha joining 4 OS=Homo sapiens (Human) OX=9606 GN=TRAJ4 PE=4 SV=1	2	1	1	0	0	0	0	4	1	1	2	1	0	2	1	1	1	0	1	1	1	14	21
sp|Q92565|RPGF5_HUMAN Rap guanine nucleotide exchange factor 5 OS=Homo sapiens (Human) OX=9606 GN=RAPGEF5 PE=1 SV=1	28	29	22	37	6	26	52	15	23	27	73	45	11	28	19	46	29	8	20	36	0	20	580
sp|P41440|S19A1_HUMAN Reduced folate transporter OS=Homo sapiens (Human) OX=9606 GN=SLC19A1 PE=1 SV=3	57	35	12	16	11	29	20	40	11	20	82	13	8	31	40	53	28	9	24	52	0	20	591
sp|Q96PB1|CASD1_HUMAN N-acetylneuraminate 9-O-acetyltransferase OS=Homo sapiens (Human) OX=9606 GN=CASD1 PE=1 SV=1	50	28	40	22	23	25	38	34	22	73	90	54	19	54	26	65	26	18	36	54	0	20	797
sp|Q96K76|UBP47_HUMAN Ubiquitin carboxyl-terminal hydrolase 47 OS=Homo sapiens (Human) OX=9606 GN=USP47 PE=1 SV=3	63	68	57	103	24	61	132	68	30	58	132	98	31	57	48	128	71	16	49	81	0	20	1375
sp|F2Z333|FND10_HUMAN Fibronectin type III domain-containing protein 10 OS=Homo sapiens (Human) OX=9606 GN=FNDC10 PE=3 SV=1	36	23	3	5	13	4	10	15	3	4	29	1	5	5	30	8	7	4	5	16	0	20	226
sp|Q9Y4P9|SPEF1_HUMAN Sperm flagellar protein 1 OS=Homo sapiens (Human) OX=9606 GN=SPEF1 PE=1 SV=3	15	23	9	12	1	22	16	14	4	6	29	13	6	5	16	15	1	3	5	21	0	20	236
sp|A6NIX2|WTIP_HUMAN Wilms tumor protein 1-interacting protein OS=Homo sapiens (Human) OX=9606 GN=WTIP PE=1 SV=3	46	43	4	18	25	13	24	60	10	9	38	7	5	10	41	35	11	0	14	17	0	19	430
sp|P09086|PO2F2_HUMAN POU domain, class 2, transcription factor 2 OS=Homo sapiens (Human) OX=9606 GN=POU2F2 PE=1 SV=3	33	18	19	13	4	38	23	37	13	12	55	21	10	13	65	50	34	4	3	14	0	20	479
sp|A6NNL5|CO061_HUMAN Uncharacterized protein C15orf61 OS=Homo sapiens (Human) OX=9606 GN=C15orf61 PE=2 SV=2	15	14	6	3	4	5	6	8	7	3	19	5	2	9	10	9	9	5	7	11	0	20	157
sp|Q14774|HLX_HUMAN H2.0-like homeobox protein OS=Homo sapiens (Human) OX=9606 GN=HLX PE=1 SV=3	64	22	10	19	5	32	22	45	14	9	38	23	5	18	47	66	21	4	6	18	0	20	488
sp|Q96FB5|RRNAD_HUMAN Protein RRNAD1 OS=Homo sapiens (Human) OX=9606 GN=RRNAD1 PE=2 SV=2	38	38	8	14	12	26	36	33	14	11	81	15	8	13	33	26	19	5	11	34	0	20	475
sp|A6NJZ7|RIM3C_HUMAN RIMS-binding protein 3C OS=Homo sapiens (Human) OX=9606 GN=RIMBP3C PE=1 SV=3	147	137	31	71	42	123	139	122	40	25	179	59	26	30	130	140	58	23	29	88	0	20	1639
sp|Q4KMZ8|NKAI1_HUMAN Sodium/potassium-transporting ATPase subunit beta-1-interacting protein 1 OS=Homo sapiens (Human) OX=9606 GN=NKAIN1 PE=2 SV=3	15	7	5	8	8	11	8	15	5	13	29	3	4	17	6	14	8	6	11	14	0	20	207
sp|Q9Y4G6|TLN2_HUMAN Talin-2 OS=Homo sapiens (Human) OX=9606 GN=TLN2 PE=1 SV=4	362	98	79	139	41	175	180	140	38	116	230	167	63	50	84	202	156	8	32	182	0	20	2542
sp|Q9BYM8|HOIL1_HUMAN RanBP-type and C3HC4-type zinc finger-containing protein 1 OS=Homo sapiens (Human) OX=9606 GN=RBCK1 PE=1 SV=2	32	34	15	25	32	42	42	32	11	15	45	20	12	12	39	21	25	9	12	35	0	20	510
sp|Q9UPC5|GPR34_HUMAN Probable G-protein coupled receptor 34 OS=Homo sapiens (Human) OX=9606 GN=GPR34 PE=2 SV=2	12	19	20	7	10	11	7	15	11	45	39	22	15	25	11	41	26	5	17	23	0	20	381
sp|Q96M42|CU129_HUMAN Putative uncharacterized protein encoded by LINC00479 OS=Homo sapiens (Human) OX=9606 GN=LINC00479 PE=5 SV=2	13	11	3	7	6	8	5	14	0	4	18	3	4	2	7	18	6	4	2	7	0	19	142
sp|Q9Y5Q5|CORIN_HUMAN Atrial natriuretic peptide-converting enzyme OS=Homo sapiens (Human) OX=9606 GN=CORIN PE=1 SV=2	38	44	54	69	88	48	70	70	31	43	93	38	22	32	50	94	51	21	28	58	0	20	1042
sp|Q7Z4H8|PLGT3_HUMAN Protein O-glucosyltransferase 3 OS=Homo sapiens (Human) OX=9606 GN=POGLUT3 PE=1 SV=2	28	32	15	26	7	24	38	27	11	18	61	36	12	19	35	29	18	7	28	36	0	20	507
sp|P62318|SMD3_HUMAN Small nuclear ribonucleoprotein Sm D3 OS=Homo sapiens (Human) OX=9606 GN=SNRPD3 PE=1 SV=1	10	12	8	3	2	6	7	15	2	10	8	10	7	2	3	5	5	0	3	8	0	19	126
sp|P49450|CENPA_HUMAN Histone H3-like centromeric protein A OS=Homo sapiens (Human) OX=9606 GN=CENPA PE=1 SV=1	12	21	1	3	1	7	8	10	5	4	19	7	1	6	11	10	6	2	1	5	0	20	140
sp|Q6UUV9|CRTC1_HUMAN CREB-regulated transcription coactivator 1 OS=Homo sapiens (Human) OX=9606 GN=CRTC1 PE=1 SV=2	48	26	22	29	2	49	24	47	16	15	62	14	17	16	81	84	47	2	13	20	0	20	634
sp|Q9BYN0|SRXN1_HUMAN Sulfiredoxin-1 OS=Homo sapiens (Human) OX=9606 GN=SRXN1 PE=1 SV=2	13	9	1	8	1	8	3	20	3	7	14	3	1	2	12	11	5	1	5	10	0	20	137
sp|Q8NAP3|ZBT38_HUMAN Zinc finger and BTB domain-containing protein 38 OS=Homo sapiens (Human) OX=9606 GN=ZBTB38 PE=1 SV=2	69	62	70	51	42	49	88	56	46	50	81	88	23	41	74	123	71	6	40	65	0	20	1195
sp|Q8NB25|F184A_HUMAN Protein FAM184A OS=Homo sapiens (Human) OX=9606 GN=FAM184A PE=2 SV=3	82	65	47	52	4	108	164	26	43	47	145	108	31	24	22	74	41	5	13	39	0	20	1140
sp|Q16829|DUS7_HUMAN Dual specificity protein phosphatase 7 OS=Homo sapiens (Human) OX=9606 GN=DUSP7 PE=1 SV=4	38	18	20	18	10	15	25	37	10	16	46	17	7	16	28	47	22	3	12	14	0	20	419
sp|Q96SL1|DIRC2_HUMAN Solute carrier family 49 member 4 OS=Homo sapiens (Human) OX=9606 GN=SLC49A4 PE=1 SV=1	45	26	10	10	12	7	13	41	5	25	79	4	11	32	29	40	25	15	12	37	0	20	478
sp|Q8WWU7|ITLN2_HUMAN Intelectin-2 OS=Homo sapiens (Human) OX=9606 GN=ITLN2 PE=2 SV=1	26	19	17	16	13	11	13	34	8	8	20	16	7	21	11	27	18	7	17	16	0	20	325
sp|Q8TCH9|YV004_HUMAN Putative uncharacterized protein FLJ23865 OS=Homo sapiens (Human) OX=9606 GN=- PE=2 SV=1	6	8	2	3	5	7	6	11	10	3	19	1	3	6	14	11	6	3	0	4	0	19	128
sp|P22455|FGFR4_HUMAN Fibroblast growth factor receptor 4 OS=Homo sapiens (Human) OX=9606 GN=FGFR4 PE=1 SV=2	63	55	20	39	16	27	48	66	22	25	103	25	13	22	61	72	29	13	25	58	0	20	802
sp|Q93073|SBP2L_HUMAN Selenocysteine insertion sequence-binding protein 2-like OS=Homo sapiens (Human) OX=9606 GN=SECISBP2L PE=1 SV=3	77	47	61	47	19	69	98	49	20	43	75	80	26	26	72	126	75	8	23	60	0	20	1101
sp|Q9NRA0|SPHK2_HUMAN Sphingosine kinase 2 OS=Homo sapiens (Human) OX=9606 GN=SPHK2 PE=1 SV=2	64	47	11	27	13	18	31	70	20	13	99	6	8	17	79	50	32	10	9	30	0	20	654
sp|O15258|RER1_HUMAN Protein RER1 OS=Homo sapiens (Human) OX=9606 GN=RER1 PE=1 SV=1	10	12	3	8	2	5	7	12	5	13	16	12	8	17	11	12	10	5	12	16	0	20	196
sp|Q15327|ANKR1_HUMAN Ankyrin repeat domain-containing protein 1 OS=Homo sapiens (Human) OX=9606 GN=ANKRD1 PE=1 SV=2	27	17	14	18	5	8	34	16	9	15	41	35	7	7	11	10	16	3	7	19	0	20	319
sp|Q8NAX2|KDF1_HUMAN Keratinocyte differentiation factor 1 OS=Homo sapiens (Human) OX=9606 GN=KDF1 PE=1 SV=2	30	33	2	26	15	12	26	26	10	14	27	14	6	10	46	47	26	6	10	12	0	20	398
sp|P40855|PEX19_HUMAN Peroxisomal biogenesis factor 19 OS=Homo sapiens (Human) OX=9606 GN=PEX19 PE=1 SV=1	28	5	6	18	5	21	41	18	4	6	33	18	13	12	20	26	15	1	3	6	0	20	299
sp|Q8N9I0|SYT2_HUMAN Synaptotagmin-2 OS=Homo sapiens (Human) OX=9606 GN=SYT2 PE=1 SV=2	24	10	21	24	9	15	36	33	5	20	39	53	13	17	23	13	25	4	9	26	0	20	419
sp|O60522|TDRD6_HUMAN Tudor domain-containing protein 6 OS=Homo sapiens (Human) OX=9606 GN=TDRD6 PE=2 SV=2	110	91	92	114	61	94	184	107	39	112	221	133	33	71	104	168	99	28	71	164	0	20	2096
sp|Q3LI70|KR196_HUMAN Keratin-associated protein 19-6 OS=Homo sapiens (Human) OX=9606 GN=KRTAP19-6 PE=3 SV=2	0	6	0	0	6	0	1	21	0	0	2	0	1	3	1	4	0	0	13	0	0	10	58
sp|A6NHP3|SPE2B_HUMAN Speedy protein E2B OS=Homo sapiens (Human) OX=9606 GN=SPDYE2B PE=3 SV=2	19	49	12	18	6	18	38	11	12	13	38	27	12	18	31	33	8	13	9	17	0	20	402
sp|Q5T7R7|CA185_HUMAN Uncharacterized protein C1orf185 OS=Homo sapiens (Human) OX=9606 GN=C1orf185 PE=2 SV=1	15	10	7	10	4	8	13	7	4	12	18	14	4	13	8	27	12	2	5	6	0	20	199
sp|Q96MT4|CF195_HUMAN Uncharacterized protein encoded by LINC01600 OS=Homo sapiens (Human) OX=9606 GN=LINC01600 PE=1 SV=2	9	8	4	4	7	6	6	10	3	6	10	3	2	8	16	13	6	2	2	2	0	20	127
sp|O60813|PRA11_HUMAN PRAME family member 11 OS=Homo sapiens (Human) OX=9606 GN=PRAMEF11 PE=2 SV=5	22	33	17	23	24	24	25	14	10	22	87	28	14	19	25	26	22	8	10	25	0	20	478
sp|P0CG01|GKN3_HUMAN Gastrokine-3 OS=Homo sapiens (Human) OX=9606 GN=GKN3P PE=3 SV=1	14	5	9	10	4	8	4	12	3	13	19	12	8	12	8	13	8	2	7	10	0	20	181
sp|P19652|A1AG2_HUMAN Alpha-1-acid glycoprotein 2 OS=Homo sapiens (Human) OX=9606 GN=ORM2 PE=1 SV=2	10	10	10	10	5	10	21	8	3	7	22	13	3	11	8	11	15	4	11	9	0	20	201
sp|P11234|RALB_HUMAN Ras-related protein Ral-B OS=Homo sapiens (Human) OX=9606 GN=RALB PE=1 SV=1	15	12	7	13	2	7	23	12	2	8	15	23	5	10	3	16	9	1	6	17	0	20	206
sp|P49354|FNTA_HUMAN Protein farnesyltransferase/geranylgeranyltransferase type-1 subunit alpha OS=Homo sapiens (Human) OX=9606 GN=FNTA PE=1 SV=1	26	22	23	28	2	29	33	12	11	19	36	18	6	9	23	19	10	10	19	24	0	20	379
sp|O94762|RECQ5_HUMAN ATP-dependent DNA helicase Q5 OS=Homo sapiens (Human) OX=9606 GN=RECQL5 PE=1 SV=2	96	67	23	44	30	45	76	75	26	24	81	73	12	36	73	82	42	8	24	54	0	20	991
sp|Q8WYK1|CNTP5_HUMAN Contactin-associated protein-like 5 OS=Homo sapiens (Human) OX=9606 GN=CNTNAP5 PE=2 SV=1	62	64	70	74	37	55	69	100	43	64	124	51	21	62	52	132	84	21	42	79	0	20	1306
sp|Q53HV7|SMUG1_HUMAN Single-strand selective monofunctional uracil DNA glycosylase OS=Homo sapiens (Human) OX=9606 GN=SMUG1 PE=1 SV=2	20	17	10	2	8	16	24	25	7	5	40	6	6	13	28	10	4	4	4	21	0	20	270
sp|O75155|CAND2_HUMAN Cullin-associated NEDD8-dissociated protein 2 OS=Homo sapiens (Human) OX=9606 GN=CAND2 PE=1 SV=3	133	78	19	76	26	55	84	60	30	44	194	48	27	38	74	90	50	4	16	90	0	20	1236
sp|O14508|SOCS2_HUMAN Suppressor of cytokine signaling 2 OS=Homo sapiens (Human) OX=9606 GN=SOCS2 PE=1 SV=1	12	11	5	8	5	8	13	16	4	8	23	15	3	4	11	15	16	4	9	8	0	20	198
sp|P51692|STA5B_HUMAN Signal transducer and activator of transcription 5B OS=Homo sapiens (Human) OX=9606 GN=STAT5B PE=1 SV=2	55	38	39	39	9	75	56	39	19	38	84	41	16	30	37	47	38	16	21	50	0	20	787
sp|Q6IN97|FRP2L_HUMAN Putative protein FRMPD2-like OS=Homo sapiens (Human) OX=9606 GN=FRMPD2B PE=5 SV=1	21	23	7	17	11	18	24	22	7	11	35	13	5	9	23	32	18	4	2	18	0	20	320
sp|Q5EE01|CENPW_HUMAN Centromere protein W OS=Homo sapiens (Human) OX=9606 GN=CENPW PE=1 SV=1	8	10	3	1	3	3	4	3	3	4	12	13	1	3	2	6	2	0	0	7	0	18	88
sp|Q86WU2|LDHD_HUMAN Probable D-lactate dehydrogenase, mitochondrial OS=Homo sapiens (Human) OX=9606 GN=LDHD PE=1 SV=1	53	34	16	20	15	21	34	50	17	13	52	13	9	16	24	25	29	9	8	49	0	20	507
tr|A0A024R1R8|A0A024R1R8_HUMAN HCG2014768, isoform CRA_a OS=Homo sapiens (Human) OX=9606 GN=ENSG00000225528 PE=4 SV=1	5	0	0	1	0	5	8	7	1	1	4	20	2	1	2	3	1	0	0	3	0	15	64
sp|A8MTJ3|GNAT3_HUMAN Guanine nucleotide-binding protein G(t) subunit alpha-3 OS=Homo sapiens (Human) OX=9606 GN=GNAT3 PE=2 SV=2	22	14	17	22	9	15	29	18	9	25	30	29	10	18	6	25	21	2	13	20	0	20	354
sp|Q969S0|S35B4_HUMAN UDP-xylose and UDP-N-acetylglucosamine transporter OS=Homo sapiens (Human) OX=9606 GN=SLC35B4 PE=1 SV=1	23	10	15	5	6	8	11	20	6	30	42	15	12	30	12	21	21	6	13	25	0	20	331
sp|O00555|CAC1A_HUMAN Voltage-dependent P/Q-type calcium channel subunit alpha-1A OS=Homo sapiens (Human) OX=9606 GN=CACNA1A PE=1 SV=3	190	201	105	119	28	108	160	193	68	114	208	110	85	125	172	164	119	32	76	129	0	20	2506
tr|F8WCE1|F8WCE1_HUMAN Glycine receptor alpha 4 OS=Homo sapiens (Human) OX=9606 GN=GLRA4 PE=4 SV=1	3	1	0	1	0	6	0	3	1	1	10	1	1	1	2	3	4	2	0	4	0	16	44
sp|Q9BQQ7|RTP3_HUMAN Receptor-transporting protein 3 OS=Homo sapiens (Human) OX=9606 GN=RTP3 PE=1 SV=1	9	14	10	5	13	16	15	9	5	15	17	15	7	11	14	15	8	8	5	21	0	20	232
sp|P48304|REG1B_HUMAN Lithostathine-1-beta OS=Homo sapiens (Human) OX=9606 GN=REG1B PE=1 SV=1	9	4	11	8	7	6	9	9	2	4	12	11	4	9	6	27	8	6	7	7	0	20	166
sp|Q92521|PIGB_HUMAN GPI mannosyltransferase 3 OS=Homo sapiens (Human) OX=9606 GN=PIGB PE=1 SV=1	21	28	19	13	14	17	20	25	26	30	82	27	15	42	27	41	33	15	29	30	0	20	554
tr|A0A075B6X8|A0A075B6X8_HUMAN T cell receptor alpha joining 44 OS=Homo sapiens (Human) OX=9606 GN=TRAJ44 PE=4 SV=1	1	1	1	0	0	1	0	3	0	0	3	1	0	1	0	1	6	0	0	1	1	11	21
sp|Q9HCQ5|GALT9_HUMAN Polypeptide N-acetylgalactosaminyltransferase 9 OS=Homo sapiens (Human) OX=9606 GN=GALNT9 PE=1 SV=3	41	56	27	38	13	25	33	48	11	29	57	23	15	17	26	36	18	11	26	53	0	20	603
sp|Q8IUC0|KR131_HUMAN Keratin-associated protein 13-1 OS=Homo sapiens (Human) OX=9606 GN=KRTAP13-1 PE=2 SV=2	2	10	3	1	21	8	2	23	1	0	11	0	1	7	10	39	11	1	17	4	0	18	172
sp|P47985|UCRI_HUMAN Cytochrome b-c1 complex subunit Rieske, mitochondrial OS=Homo sapiens (Human) OX=9606 GN=UQCRFS1 PE=1 SV=2	26	18	5	13	5	8	15	19	6	10	25	13	4	9	19	27	13	2	8	29	0	20	274
sp|Q9H5V7|IKZF5_HUMAN Zinc finger protein Pegasus OS=Homo sapiens (Human) OX=9606 GN=IKZF5 PE=1 SV=1	22	19	20	21	16	24	22	25	24	14	29	23	12	12	38	45	21	1	13	18	0	20	419
sp|Q14185|DOCK1_HUMAN Dedicator of cytokinesis protein 1 OS=Homo sapiens (Human) OX=9606 GN=DOCK1 PE=1 SV=2	87	104	71	111	17	88	145	86	45	113	187	151	59	90	93	116	98	17	65	122	0	20	1865
sp|O95471|CLD7_HUMAN Claudin-7 OS=Homo sapiens (Human) OX=9606 GN=CLDN7 PE=1 SV=4	25	5	6	6	8	7	3	23	1	13	21	10	13	7	7	18	9	5	9	15	0	20	211
sp|Q8N6M0|OTU6B_HUMAN Deubiquitinase OTUD6B OS=Homo sapiens (Human) OX=9606 GN=OTUD6B PE=1 SV=1	23	17	13	11	4	18	41	9	8	19	30	28	8	3	11	12	14	1	8	15	0	20	293
sp|A0A0U1RQE8|GLYLB_HUMAN Putative glycine N-acyltransferase-like protein 1B OS=Homo sapiens (Human) OX=9606 GN=GLYATL1B PE=3 SV=1	14	15	20	10	7	15	21	19	5	15	32	20	11	10	14	26	9	7	13	19	0	20	302
sp|Q8N183|NDUF2_HUMAN NADH dehydrogenase [ubiquinone] 1 alpha subcomplex assembly factor 2 OS=Homo sapiens (Human) OX=9606 GN=NDUFAF2 PE=1 SV=1	8	11	5	6	0	9	20	10	4	9	8	18	3	5	12	12	10	6	7	6	0	19	169
sp|Q86XE3|MICU3_HUMAN Calcium uptake protein 3, mitochondrial OS=Homo sapiens (Human) OX=9606 GN=MICU3 PE=1 SV=1	39	41	19	29	5	13	43	31	8	21	56	34	11	35	27	33	32	7	18	28	0	20	530
sp|Q9P016|THYN1_HUMAN Thymocyte nuclear protein 1 OS=Homo sapiens (Human) OX=9606 GN=THYN1 PE=1 SV=1	13	12	11	10	3	10	19	12	6	5	19	25	8	10	13	20	11	3	5	10	0	20	225
sp|P56748|CLD8_HUMAN Claudin-8 OS=Homo sapiens (Human) OX=9606 GN=CLDN8 PE=1 SV=1	21	10	10	4	9	7	8	16	4	17	20	9	11	10	5	17	12	5	8	22	0	20	225
sp|A4D2P6|GRD2I_HUMAN Delphilin OS=Homo sapiens (Human) OX=9606 GN=GRID2IP PE=3 SV=2	94	93	21	56	19	50	86	87	24	29	143	48	23	46	126	125	56	9	17	59	0	20	1211
sp|Q6AZZ1|TRI68_HUMAN E3 ubiquitin-protein ligase TRIM68 OS=Homo sapiens (Human) OX=9606 GN=TRIM68 PE=1 SV=1	26	36	14	21	17	23	48	25	15	22	49	25	10	12	30	30	16	14	18	34	0	20	485
sp|Q9BZL4|PP12C_HUMAN Protein phosphatase 1 regulatory subunit 12C OS=Homo sapiens (Human) OX=9606 GN=PPP1R12C PE=1 SV=1	103	84	16	40	8	32	91	61	13	12	78	27	8	8	71	61	28	8	6	27	0	20	782
sp|Q16740|CLPP_HUMAN ATP-dependent Clp protease proteolytic subunit, mitochondrial OS=Homo sapiens (Human) OX=9606 GN=CLPP PE=1 SV=1	31	17	6	9	5	18	15	20	7	20	27	9	11	3	23	16	12	2	9	17	0	20	277
sp|Q9BZS9|YG041_HUMAN Putative uncharacterized protein PNAS-138 OS=Homo sapiens (Human) OX=9606 GN=PNAS-138 PE=5 SV=1	2	1	0	3	4	5	1	2	0	2	5	3	1	5	3	5	2	0	3	2	0	17	49
sp|P0CE71|OCM2_HUMAN Putative oncomodulin-2 OS=Homo sapiens (Human) OX=9606 GN=OCM2 PE=5 SV=1	10	2	2	12	1	8	12	6	1	4	8	7	4	9	2	11	5	0	1	4	0	19	109
sp|Q9NQ25|SLAF7_HUMAN SLAM family member 7 OS=Homo sapiens (Human) OX=9606 GN=SLAMF7 PE=1 SV=1	13	13	17	13	9	10	23	21	7	20	36	19	7	9	21	28	26	6	12	25	0	20	335
[truncated: 18,625 more rows]
